# Supplementary material for: Comprehensive analysis of proteins associated with light responses and stress tolerance in the gametophyte of the fern Dryopteris affinis ssp. affinis
Source: bioRxiv preprint, doi:10.64898/2025.12.05.692567, version 1 (2025-12-05)
Supplement: Supplemental Table 1 [file 692567_file02.docx]

**Supplementary Table 1**. Nucleotide sequences of proteins found in gametophytes of the apogamous fern *Dryopteris affinis*.

| **PROTON GRADIENT REGULATION 6 (PGR6)**:  TTTTTCTGGAAAGCTTTCAATTGCATTTTTTTAAAGAGTTTGTCTTGTAAAACCTTTCATGTACTTACTTTCATTACATTGTGGTACACTACTTTCATGTGGTACAATATTGTGGAAGAAATGTTCATGGAACCAATAGGTAACATGAGTTGTATTTACTAATATACATCAATACCAAACCATTTAAGATGGTTTGGTATTTATGTTCATGAAAATGTGTCTACAGCCCTTGCCAAGCCAAGGTTGCAACAGCAAATATCTACACAAAAGCTATAACTTGGAATATCTATACAAAAGCTATTACTTGGAATACTTCATTACTAGATTACAAATCAGTGTTCACTTTTGCCGCGCCATTAAAGGTTCACCATTCTCTGCTAGCACATCCCCGAGTTGCCCTCTACGCAAATTTGTCATCCGGCTCCAAGTGCGTCATACATCCATCCAATTTTTTAAAAACCCAAACACCTATGTAGTTCTTATACATATTTAGGAGTAAAATGCCCCTGAAGAAAGCATTTACATCCTTGACAACAAGGATATCCTTTCCATAAGACCTTGACTTTGACATGCCTCTCTTCAAAAGAATGCTGCTTTCACATAAAGAATGACACACACAAGATGATGTACTCCATGCAGAAAATCATTGAACCATTATGAAGAGCAAGAGTAAAGCTTGCATGACCAGCTCAGCGGTCCACAAGAACTGACTCGCTCCATGATAGCATTAGATCCCTTGTTGCAGCAGGTATTCCTTGCACAACATCGACAACTAAATTTGCAACGTTGAACTCCCCTTCAACAAGTTTGTAGATGTCTAACAGCTCTCGAATGTGTAGTCTAGAATCCTCTGTGAATGCCATCAGCAGCTGCCGCCTTATTCCAGCATCGGTGAGGACAACTCTTGCACCATCCTTTATTGTGTCAGTAAGATCTAACTTCGCTCCACTGGTTGTTGATGACCTCATCACGTCCCGGCGGTTCCTCGCTTGTAAAGGAGTCATCATCTCAACCTGCTCTCTTGCAAGAACAATCAAGTTCTCTAAGCGTTTCCATTGAAATGCTCCATCCTTGAACAGAACCTGAACAAGGCGTTCTCGCAAGGCTGGGTCAGGGTCAGTCAATAAACGCTTGGCCACATAAGGGTAGGCCACCTCGAGAAACTTGAAATCTGGTTGAAAAGTGAGACAAATTCCCTCTTGAGTCAAAAGAGAGCGAATAACTAATGAGAATCGTTCAGGAATGCGTATGGGATATTGATACACAAGCTGATTAAATTTGGCAGTCACAGAGCGGAAGTTGAAATCCGACAAACCCTTCACGGTTGAATTTTGCCAGATTGCTTCTAAAGCTGGTACAATTGGTGTCAAATCTGTTCCAGGTGCAAGAAAACCCAACCTAGTGAAATCATTGGCCATCTCCACATAATCTTCGTTTACCGCATGGACAACTGCATCAATAAGAATCTGCTTGTTTTGCTGACTTAGTACTGCAACATTTCCAAAATCAACATAAGCGATACGTCCGTCTCGCATGGCAAAAATATTTCCTGGATGGGGATCACCATGAAACAGTCCAAACTCAAGCAATTGCCTTAGAGCTGCACTTACACCCACTGTTATAAAAGCTGGTACATTAATTCCTGCATCTTTGATGGCCTGAGGATTGGTGCAGCGTATTCCATCAATCCACTCCATTACAAGCACTTTAGAACCACTTAGATCTTGGTAAACATCTGGTATCTTGACTGTGGCATCATTTTTGAAGTTCTCCAGAAAATCCTTAATGTTGCGTGCCTCAAGAGTGTAGTCAAGTTCTTCAAGTAGTTTTTCACCAAACTCATCAACAACTAGTTCTGCATTGCAGCCCAGCTTCTGTAGGCTTATTCCATTCAAGAAGGAAGCCAATGTTCTAAACAGAAACAAATCTCTGTAGATTATGGGTTCTATCCCTGGACGCTGAACCTTGATAGCGACCTCTTTCCCAGAGCTCCGAAGTGTGGCCCTGTATACTTGTCCTAAGCTTGCAGCAGCCACGGTTTCTGATGATATTATGCTAAACAACTGCTCAAGCGGTGCACCTAACTGTTCCTCAATTATCTCAAAAGCCACCTTATTAGGAAAGGCAGGCACATCATCTTGTAAAATGCACAGCTCATTCATGTAATCTTCACGAATGATGTCTGGCCGATTTGCGAGGACCTGCCCAGCCTTAATGAAAGATGGTCCAAGGTCACATAGTAAATTCCTTAACTGTGCAGCTCTGTAGGCCACCATTTCCTCACCTTTGCCAATAAGACAATCATAAGAGAGGCTGCCCCAATAGTAACCTAATTTCAAAAGGATCTCGGCGCCACGCGAAACCACAGAAAAGAAAGCCCCAGGAGAGTCTAGAACCTTCTGTCGAACCCCTTCTGGTGTGTACTTCCTAAAAGGGATGCAAACTCCTCGTTCCAAGTCGAGGACATCCATGGCTGTGCTAGATTTCTCCCCCATGGGAGTGTTTACAAATGCATTCTCTAAGGTATCTCGACGCCGCAGGAGAGTACGCTTTGCAGAAGTGGCACTTCTGGTCTTTAGAGGAGCAGAAGAGACTGCAAAAAAATCTCCACTTCTCCGAGTTGGGCTTAGGAATTCGGCAGAATTATTGCAATTTGCACATAGTCTTGCTCCAAGGAAGCTGTTTCTATAGCCATGGCCAACATCCTGTGCATCCGAGGTAAGTGGAGACGCACGAAGCCCTAGGAAAGAATCTGAAGCTGAAGCAGCCATGGCCATCTCCAAGGAATACACAGAGACTAAATTGCACAAAAAACACCTAGAAGAAGCTTTCCATGTAAGCTTCTAAGATGTATGTGCACAGAACAAAACGAGGTTTCTTCACGTGGCTTCAAAGCTTCACGGAAGATTTCCCTGAGATGTACCTCCTTGTCTGCGGAGATGACGAGCACGCAACACACAGAGACGAATTCAAACAAAAATGCGCAATGTCTGTGTGAAGTTGCTCCACAAGAAGGCGATTAGCTGCAGAAAACCCTAGCTGCCTATGGAGATGGCGTGTCGTGCTGATAACAAGAGGGATTGCTTGAAATAATGTGAGGCCTGCTGCAATCGTTTCCATTTTTTGTG |
| --- |
| **LEAF-TYPE CHLOROPLAST-TARGETED FNR 1 (LFNR1):**  ATTTATATTAGAAAGAGGGGCTGACAAGTGTAATTAGGGGAGAGAGCCACGTGGCCTTACATAAGAGACGGCTACCTAGGATGGAGGGCGTGAAATTAATTACAAAGTGTCGCATCATCAACGACGACGTTGGGGCGGGGAGAGTAGGCTCCGAAGCTGAGGAGGAGAGGTCGCGCCGGACACTCCATGGCCGTTGCAGAGACATCTCCAAACAGGTGGGAGGAATTCAACAGTCTCCATTCCACCACGTCTTGAGGCTTCTCATCCTGGGTGTTTTGCAGGTGCCAGGGGGTTCTTGGTTGGAAGCGATTGACGGGAGCAGAGCAGAGCAGAGCATAACAAAGCCAAAGCACACTGCTTCTCCTCTTGCTCTGCCTTTATACCTTCAGTATGTTCCTGCTTGTCTGAGCTGTTGCATGTTGTGTTTTCCAAGCTTTCAGAACCTTTAGGTACACTGTCCTAAGAGAAGGATTGTATGAGCTAGATTGTACCCGTCTTTACAAATCTGAGACCAAGTCCACGAGAATTTAACGAAGTAGGATGAAACTCAAGGATGAAACTCAAGTTGAAGCTCCACACACATACAGCCGCCGTTGTAAAACGATGGCCTGCTGAAAAGAGGGACCTCTTCTGGGTGTTGCAGACTTTGCATTTCTAGTTTTTTTGGTTGTTATGGGCGTGTCATAATGTGCTTGTACTTAGATACCAATACTTGTATCGCATGATGTGCTTCCTGAATAGTTGCTGCGCAGCAAATTATTCTAGGATGCCCTCTGTTGTGAGATAATAACTTCCATGAACTACTTTGAAAAGAAGGCCTTGTGGATCCTCCAGCGATTTGTTTAAACCTCTTGTGATGCAATCTGAACCTCTACAAACCTATTTTATTAGGCCTGGGGTCCGCATGGCTTTTTATACACGAGTACAGCTGTGAAGATTGTCTCATCAACAACCAAACTCATACCATCAGCTTCGACATTTTACTAACATTCAGCTACTCCACTCCAGGGGTAGTGATGGTCTACAAGAATATGATTATCTTATAGATCAATTGCAGAAAAGGCCTTATGCTACAGAAGAAGATTCTAGTCAATGTAAATGATGGTTTTATCCCGGTTAAAATCTTTATGAAGATCAGGGGCCTACGGAAGAAGATTCAACCTAATATAGTACAATGTAGCATCTAATGCGTAAAGTCTGTGACAAGTAAGGTTAGCAGAGCACCATAAACCTATGGGATGCACCTTTTCTAGCAGAACATGAGAAATATACCAATTGATAGAATTCAATTAAAACAAAACTGTGTAATTGCTTGTAAAACAGTACAACTGTTTGTAAACTGTGTGTAGCAACAAAGCAGTGTGCCAGTTTTCTTCAGCCAATCCTTTCGTAAGATGGAAGGCTGTACCCCTCATGATAGCAGAATTGCCTGGCTATATTAGTGGCTTAATTCTGCACCTCTGTACTCTCCACATCGAGGCAATTGAATACTTCATGGCATATATATAGCCCCTGTTTTCCTCAAAACAAAAGCAAGAGCAGGGAGGTGAACTTTGCCTGATAAGTCTTGGCCCCGTAAGAATATGCAGTCTAGCCACTCACATGATCGGAGCCAAGACGGCCCCGTAAGAATAGGCAGTCCAGTGACTCACATGATCATAGTCTAAAAGGGTTACTGCCATATTTCTGAATAGCAAACATTTCCATATACCAGAAGAAGAGTAAATAAGCCAAGAGGAAAACTAACTGTTACTCAGGACCAGCAGGTAAGATTGTTATCACAGCAAAAAATGAGCAAACAGTAAGCAAACTATTAAGGCAACAAGAAAAAGAAAGCGGAGGACTTGGTTTACTCTCGCAATCTTCATCGCAATGTCGTCCAGGCAAGACCAAGAAAAGCCAGGAATAAAGGACAGGGCCAAGGTAGCCCCTACTTACAAGAACAACAATCATAGTGAAAAGTTGTAAATGAACTTGATTATGATAGGGTAGATTCTAGAATGTGCTTCTTCAATGGAATTGCTCGCCCTTGAAGGTTTGCCCCAACTGCCAGGATGCAGGGGCAACATCATAGGAGATGAGGCTGGAGCCGTCCTTGAGCAACACTTTGAAAGAGAGGCTCTGCCCCCTCATGTCCTGTGGAGTTCGCCAATTGGAGCCCCAATTCCGTTCAAGGGGAATCCATCCTGTCTTCGACCCCTTCACTAACAAACTTTTCACCTCTCCTGTGCCACCCACATTTGTCAGCAGCACTAAATTGTATCGCGAGTTGCCGTTGATGGTAAACTGGATCCCCCCTTGACGGGTGCAGGGCACACTCCGATAGAGGACAGGAACAGGATTGCCGGTGCTGTAGCTGGCGATCTCCGAGAAGGCAGAGTTGGTGACGTCAAAATGCTTGTTGGGTGGGTTGCACCACGCATTAGGATGCTCGGAGTTTGGAGGGCACAAATTCGTCGCAGTTACCACTACGCTTTTCCCAGCTGCACACCGCTTTGCTGCATCGGGAGCGGACATGTCACACTTAATCTCAAAGCAGCTGCCACATCCAGACCCACTATTGAAGAGGGAGGCACTCACTGCCGCTGTGTTGCTCCCATAGCCACTGTCATAGCGGTCTCCATAACCACAAGCACCACTGTTAATGGTGCCGGAGTCATCTCCATAAACAGTAGCCTTTGCTGTTAGCCATGTCGCTTCCGTCACTGCTGCAGCAGCTGCTAACTGCATGCAGCTGACGAGCAGCAGTAACACAAGCAAGTCGCTAGACGCCATAGCTTGCATGCCAAGCTCTCTCAGCAGATACAAAATTCAACCCAGAAGCTGCCACGCGACGCCCGAGCTTCACGGGAGAAGAAGAGGACACGGCGCGCTCCTATGCTTTGCTAGCACAAACAGCGGGAAATGGGCACTAGAGAGAAAGGAAGCTATTCTATATTTAATGCTCCTGAGTCCTCCCTTCTGTATGCAATAGTTTTGTAGGTGAGACTCCGATGAGAGAGAGAGAGAGAGAGAGAGCATGGCCTCGCAAGCTGCAACAGTGCCCTCCTCCTCGGCTGCTGCTTCCTCTTGCCTCGACCGCCTCTCTGCAACGACCCTCCGACCTGCAGTGGATCGCGTCTCATTGCCTGCATTCAAGTCATTCTTCAATGGCACGGCCCTTTCTTGTGAGAACAAATCTAGCAACTTCAGGAATGGGGGTGCTGTCACTGTGAAAGCGTCGGTTGCAACGGAAGCACCTGCCAAGGTTGTGAAGGAGTCCAAGAAGAATGATGAGGGTGTGATTGTCAACACATTCAAACCCAAGAGTCCGTATGAAGGTCTATGTCTGCTCAACACCAAGATTGTTGGGGATGATGCTCCTGGTGAAACCTGGCACATGGTCTTCAGCACAGAAGGTAAGGTGGACTACAGGGAGGGTCAATCTATTGGAGTTATTCCTCCTGGTTTGGATGCTAATGGAAAGCCTCACAAGCTTCGCCTTTACTCTATTGCCAGCAGTGCAATTGGCGATTTTGGAGACAAGAAAACTGTTTCGCTTTGTGTGAAGCGGCTTGTCTACATCAATGACAAAGGGGAAGAAGTGAAAGGGGTGTGCTCCAACTTTCTATGCGATTTGAAGCCTGGGTTACCTGTTTCTATAACTGGACCTGTTGGAAAGGAAATGCTTATGCCAAAGGACGAGAATGCAACCATTATCATGCTTGCGACCGGAACAGGTATAGCACCTTTTAGAGGGTTTCTGTGGAAAATGTTTTTTGAGGAGCATGCTGATTACAAGTTCAAGGGACTCTCCTGGCTCTTCTTGGGAGTGCCTAACAGCAGCACTTTGCTGTACAGAGAGGAATTCGAGCTTATGAAAGAAAAGTTTCCCGAGAACTTCAGGCTAGATTTTGCGGTCAGTCGTGAGCAACAGAATGAGAAAGGAGAGAAGATGTACATCCAAACACGGATGGCACAATATGCTGATGAGCTGTGGGAGCTTCTGAAGAAGGACAACACATATGTGTACATGTGCGGTTTGAAGGGGATGGAGAAAGGAATTGATGATATCATGACAAGTCTTGCTGCCAGAGATGGTTATGACTGGTTTGAGTACAAGCGAGAGCTGAAGAAGAACGGGCAATGGAATGTGGAGGTGTACTAAATTTTACTCGAAGAGCTTCAAGGTGGGGATGTCCTTTTTTGTACAAAATCCTTTTGGCAATGGGCTTCATTAATAACCAAATGAAGCTCATTCTGCCTCTCTGTACCATGATCCATCCCTAGTCCTATGATCTAGCGCCAATATAGCTTCTTCCAAGAGCCTCTCTTGCATTTCACTGCATGTACCATTGTATGTGTTCATAAAGTCAATATCTACAACAAACTCTTAAGACCTGCCATTTGGCTTGAAGCAATTCGGTCTCAAGTGCTGTGTGTTGGTGATACTAATTTTAATGATGTAAGTTTTAATATTGACTTTGAGATGGTCACACACTGAGCCACACCGATGTTTCGTTAGGGAAGTGAAATTGTAGTAAAAATTTCACTATAAGGTATGCATTTCCG |
| **LEAF-TYPE CHLOROPLAST-TARGETED FNR 2 (LFNR2)**:  TTTTTTTTTTACCTGAAATGAAATGCTTTATATATTACACAGAGGACAAGACATCAACTGCAGCTGTTGGGACAAAATGCATCTCCAAATTCGACAGCAATGGTTGTCACCTTTCGAATGCAGGTCTACATTAGTACAATCCCAAATAGGGGTGTTTGGGCTCAGCATCAAAGGATGGAGTGTATACAAGGGAGAAACAGGGTAAGGTCAGCTCGGTAATACACACATACATATCAACACCAACTTGATGCCCTTCTTCTGGCCTATCTTTGCAATTGAAAATTAGCAGCGCTTCTCTTCCATTAGTCTGCGTTCTAATCACCATGATCTGTAGCTGCAATCCAGCTCGACAACATGTGCCAATCCTGTCCTCCTGTTCATGTCAACGAATTGATACTTATTAGTAGACCTCCACATTCCATTGTTCCCTCTTCTTAAGCTCCTTCTTGTATTGCAACCAGTCATACCCATCTCGAGCGGCCAGACTGGTCATGATGTCGTCTATGCCTTTCTCCATCCCTCGAAGACCACACATGTATACGTAAGTGTTATCTTTCTTCAAAAGCTCCCATAGCTCATCAGCATATTCAGCCATCCTTGTTTGGATGTACATCTTTTCACCTTTAGAGTTGCTTTGTTCTCGACTAATAGCAAGATCATATCTGAAATTATCTGGGGCAATATTTTTCATCTTCTCATACTCATCGACATAAAGAAGCGAACTGGAGGTTGGAACACCTAAGAAGAGCCAAGCAAGCCCTTTGAACTTGTAGTTTTCATGCTTCTCAAAGAACATCCTCCATAAAAACCCTCTGAATGGAGCAATGCCTGTACCAGTTGCAAGCATGATCACTGTAGCATTGGGGTCAGTGGGCATTAACATCTCCTTCCCAACAGGGCCTGTGATTGACACATCACTTCCAGGTTTCAAGTCACAAAGAAAATTTGAACAGACACCCTTCACTTCTTCACCCTTGTCATTAAGGTAGACAAGCCTTTTGACACAGAGGGAGACTGTTCTGTAGTCCCCAAAGTCACCAGGAGCACTGCTAGCAATGGAGTAGAGGCGAAGCTTCTGAGGTTTACCATTGGCATCCAGACCCGGTGGGACAACACCTATGGACTGACCTTCACGGTATTTTACCTCGCCTTCAGTACTGAATACCATATGCCAGGTCTCGCCAGGAGCATCATCTCGGACAATCTTGGAATTGAGAAGGCATTTACCAATGTATGGGCTCTTGGGTTTGAATGTATTCACAATCACACCCTCATCATTTTTTCTAGATTGCTTCTTTACAGGAGGGGGGGCAGTCTCTGTTTCCACAGAGGCCCTTACTGTGGTACCTTTACCTCCTGCCAATCTTGCCTTCAAAACTGAGGAGTCCAGGCATAGCCTGTTCCCACTTAAGAAACCCTTGTTGATACAGAAAGTGACATTGGAGGAAGCAGAGGGGGAGTCGTTAAAGGGCTGCTGCAAGCAGCGCCCATGTAGAGCAGAGGAAGATGCAGAAGAAGCAACGGCAATCGAGGAAGCCATCGCCTTCTATAGCGTCTCTCTTCTGTGCCAGCCTTCTTCTTCAGAACTAGCTTGATTGCTCGTGCTCCCTATCCTTGTGTGGCTCTCACTTTATGGATAGGCCAGCCCTCTCCCTCCACAAATCACATTTTTGAATGCTGGTATAGTTTTAGACAATTCCCACCATTATTCTTACCACAACACATGCCTCGCTATTATTTAAGCTAATGCCATTGTGGGGCAGACTCCAGAGAACTTGCTAGCCCCTACACTGTGCCCACAATCACATGTCTAGGGT |
| **K (+) EFFLUX ANTIPORTER 3 (KEA3):**  TTTCTACATCGTCTCTCGTTTTTTCAGCTGATCCATACAGCCCACCTCGATTTTTCAAGCATTACCGACCTCGGGCAAGCTTTGTATCAAGCGGTGCCCTCCGTCGCCAAACCCTCTTCTCCATCGCCCAAATGCTTCCAGTTTCTCAGCTTCTTCCCCATCGCCAAGATAACTTGCTTCCAACAAACAAAGCGCTTGCTTTATGACCCACACACGCCCCCATCGCCACTCATTTCTTCGCTTCTTGCCAGAAAAACAAGCTCAGCTACAAGTCCTCAAGACATGAACGTATGATGGGCAGCTTGCAGAACCCTCCACTAATGTGTCTTGGGTCTGGTCTTCTCCATATTGCATGCACAGCTCAACTGAACCGCAACATCAAGTACCCAATGGAAATTACTTCATGCAGAGCGCGTCGTTCAGTTCATATTCATGCAGCATTACCGGGTTTCTGCAAATGAAGCCTCTTCTCTTACACATCTCCACAAACGCGTCTACTCATCCTTTACGCAAGCTATGGGAGATTTGAAACCTGTGTCGGCTCATAAAGCTAGTGTCACACATACGTTACGTAGTCAAAGGTGGCACAATGTTTCAATATCTAGTTCTTTACTGGAAAAGAGGCAGCAAAGGTTTTATGAATGTATTTCAAGAAAAGTCAGTTGTAAAGCAACAATGCACCTGCAAGCCAGCACCAGGCATCTTAATGCCAGGCACCCTACACTAAACTGTGGCAGATGGTTTCGTCAATGCAGAAAGTCAAATTGCTTTGCAATGCGAAATCGGTCTACTAGACATCTATGGTTGGTCCCAAGAGCTGAAGTTAACCTTGCAGCTGGAGTAGATGTTATTAATGATTTGGGTCTAGATACTCTAACTTTTCTAGCAACAACTGTTGTGGTTGTTCCTACATTCAAGGCTCTGAAAGCTAGCCCGATTTTGGGGTTTTTTGTCTCAGGAGTTGTTCTAAACCAGTTGGGTTTGATAAGGAATATATTAGATGTCAAGGCCTTGTCTGAATTGGGCATCCTTTTTCTTCTGTTTGAGATGGGACTTGAGCTTTCCTTGGCACGCCTTAGAGCACTTGCCAAGTTTGCTTTTGGAATGGGTCTGGCGCAGGTTTTGTTTTCAACTTTAGCTTTTACTGCTTTTGAGCTTCCACCAAATGGTGCTATTGGGACAAAAATCTTGGAGTTCTTGTTTCATTCAAGGCCAGATCTGGTGAATATTCGGACAATAGATGAAGCGGTTGTCATTGGTGCAGCACTGTCTATGTCTTCATCAGCCTTTGTGCTTCAGCTTCTTGCAGAGAAGGGTGAGCTTCCAACTCGTTTTGGTTCAGCCACACTTGGTATTCTACTCTTTCAGGACATTGCTGTGGTTCCCCTGTTGGTCATTTTACCAATTTTAGAAAGTGGGACCTTAGGGAAGGAAAGTGTCTGGCCACTTTTAGCTGCTGAGAGTCTAAAAGCTCTTGGTGGTCTTGGTATTCTCTCTTTTGGGGGTCAAATAGTTTTGCGTCGTATCTTTGAGGTTGTGGCTGATTCAAGGAGTGCTGAGGCTTTCAATGCTCTGTGCCTCTTGACAGTGACTGGGACATCACTAGTCACTCAAAAGCTTGGTTTCAGTGATACACTTGGAGCTTTTCTTGCTGGCGCTTTGCTGGCTGAAACGAACTTTCGCACCCAGATTGAAGCAGAAATTCGACCGTTTAGAGGCTTGCTGCTGGGTCTATTTTTTGTCACAACAGGGACCTCCATTGATATTCAGCTACTGCTGCGGGAGTGGCCAAATGTGCTGACTCTTCTAGGTGGGTTGATTGCAATAAAGACAGCAATAATCACTTCCATTGGGCCGTTTGTAGGATTGTCTCTACCAGAAAGCGTTCGCATTGGGCTTTTGCTCTCTCAAGGGGGAGAGTTCGCGTTTGTGGTGTTTTCCCTTGCCAATAGATTGGGAGTGCTGCCTTTGGAGCTGAACCGTTTACTTATTATTGTTGTTGTTCTTTCCATGTCTTTGACACCTCTTCTGAATGATTTGGGTCAGAAGGCTGCACAAGCTATAGAAGCACGTCTTGATATCCCTCGAGATAATTCGACGACTGCAGAAACATATGAGGCGAATGATCCTGTTGTTATTATTGGGTTCGGACAGATGGGCCAGGTGCTGGCCAATTTTTTGTCAACTCCATTGGCGAGTGGTCTAGGTGGTGATTCTGCTGGATGGAGTTTTGTAGCTTTTGACTTAGATCCTGGCCAAGTGAAGGCTGCTCGAAAATCCGGATTTCCAGTCCTGTATGGTGATGGCTCACGTCCTGCAGTGCTGCAGACAGCAGGCATCACTATGCCAAAGGCAGTCATGGTTATGTACACTGATAAGGAGAAAGCAGTAGAAGCGGTGCAACGTCTGAGACAGGCTTTCCCAGGGGTACCTATATATGCTCGTGCAGAAGACCTTTCACACTTGCTTGAGTTGAAGTCAGCAGGAGCTACGGACGCTATCCTTGATAATACAGAGACCAGCTTGCAGCTAGGATCTGTCCTCCTTCGAGGATTGGGTGTCTTGTCTGATGATGTAAGCTTTTTGACTCGAGTCATGCGCGAGTCTCTGGAGCTGCGTGCCAGAGTGGCACTTGACAGGCAGGAAGAGAAGGATGGAGCCTGGCTGAACTCCTTCCAGGTTAAAGTAAGGCAATCATGGGATGCCCGTATGCAAAAGCAGCGTCTCAGAGAACCAAGGCGCCTTTCTCCCAAACTAAAACTGGAAGGGATTATTGACTCAGAAGCTGTGTCTGAGAATGAGCACACATCAATCACTTCCAATGGCAGTTTATCAGAGCACAAGGCAGAGCCAGAAAGCAGTTCAGAAGGTCATGATTTAATAGACAGTGCAAACAGCATGGCAGCACAGAATTCCTTTGAGCTTTCAACAGCTAATGTTTCCCAGACTCCCTTGATTTCATCCAGTGCAGACAATGAAGTAAAGGTGCCCTGGCACCAAAAAATGAGTTTTTCAAAATATGAACCAAGTTCTGGATCTGTAATTCACCCAAGTCCAGATGCTAGAGGAGTAACATGGTGTGCATTGACTAATGAAGAAGGCTCTCAAGATGCTGATGAGGACCGTCCAGATGCGGACGTGATTGATCGAAGTGTTGAATACATAAGTAAACTTGAATAGTTTCAGAGGCCCTGGCTTATAGAATTGTGAGTGTTTAATAATGTGCACACCTTTGTCTGAAGTTTCAAAGACAACTCTGATTTTTCTTGTGAGTTGCAGCTTTGTACAAAACAGTATGTCTGAAGATAGTACCGTCTGTCCAACATTACAGAGATTTTTTTACTTGCTTGGTGGAGATTCATTACTAGGGTCTAGTAAGAAGCCCTTTCTTAACAAATTTGGGCTCATCTTCATCATCCATTATTCCCTTTCTTGTGGGAACCAAGGCCATCACCAGGTGTACCCCGACTACTTCAAAAAAGTGGATTACGAAACAAGTGTCAATGGAAGTTCAAGTGACAGCAAATCAAGGCATTAATTGGAGTTGTACTTCTGTAGTTTTGTGTATCCTTGGCTCTGCCGCTCAGTGATTACCTTTAACATTTTGTAACTGCATTTATTGAAGTTGCAATATTGCAGCTGAGAAGCCTGTATTATTGGCTTTTTGTGACTCATTGAGCAGTTTCAACATCTTGTAACTGGCTCAGAATATATTTCTTTTGGAAAGTGTATACATTGCATGTGCATATTGACAATTGTAACGTGTAATCTGTGCAATCAATTGCTTACCAGTTTAAGATCAAAAAAAA |
| **HIGH CHLOROPHYLL FLUORESCENCE 136 (HCF136)**:  AAGAGCGTTCTCTAACTTTAGCTCATGTTTTTTATGTCCTCATAATCCTATACAAATGAGTGATATTTGGCATGCTACGTGGGAGAGAATTGGATAAGGTCCCAAACTTCTCATTTTATACAAGTGCATTGAGACGAAGGGATGGCGACGGCAATGGCTGGTCTGCACTTGAAGTTCGCCATAGCCAGCTCAAGCAGCGAGCTTTTCTCCTCAACCCAGCGTCTACTGGCGTGCGCGCTGCCCTCCCTCTCGCAGCAAGCGCGACCTTCAACAGCTCGTTCCTGCCTGGCCAACAACAGCGGCGATGGTGAGGCCATTTTCAGCAAGAGGCAGCTGCTCGCGGGCTCTGCATCGCTCTCCTGTGCGCTTGCTGCCTCGTCTTTGGTGGGGCTTCCCACCAGGGAGGCTCTAGCGGAAGAGCTCCTTTCTGAATGGGAGATGGTGCCCCTGCCCATCAACTCCGGAGTTGTGCTCTTGGATATCGCTTTTGTCCCCGAGGAACCTGACCATGGCTTCCTCTTAGGCACAAGACAAACACTTCTGGAAACAAAGGATGGAGGAAAATCATGGGCACCTCGATCTATACCATCTGCAGAGGATGAAGATTTTAATTACAGATTCAATTCTATAAGCTTCTGTGGCAAGGAAGGCTGGATTGTTGGGAAGCCATCAATTCTCCTACACACTGCTGATGCAGGCACGAGCTGGGAGCGAATCCCTTTGAGCTCGAGGCTTCCTGGCACTCCGGTGCTTATCAAGGGAACGGAGGAAAAAAGTGCGGAGATGGTCACAGACGAGGGAGCAATCTATGTGACATCCAATAGGGGCTACAATTGGAAAGCAGCCGTAGCAGAGACTGTTTCGGCCACATTAAACCGTACAGTTTCAAGTGGAATTAGTGGCGCTAGCTATTACACTGGCACTTTCAACGCAATAAATCGCTCAAGTGCTGGAGACTATGTTGCTGTATCAAGCCGTGGCAACTTCTATTTAACTTGGGAGCCTGGACAGGAATATTGGCAACCGCATAACCGCACAAGTGCTCGAAGAATCCAAAGCATGGGCTGGCGTGCGGACGGTGGACTATGGCTTGTTGTGCGAGGAGGAGGGTTGTACCTCAGCAAAGGTTCTGGGGTAACTGAAGATTTCGAGGAAGCGCAAATCCAGAGTAGAGGGTTTGGAATTTTGGATGTAGGATATCGATCAAAAGATGAAGCTTGGGCAGCTGGAGGAAGTGGTATATTGCTAAGAACGGCTGATGGTGGAAAATCCTGGATTCGTGACAAAGCAGCAGATAACATTGCTGGAAATCTTTATACAGTAAAGTTCATAGACGATAGAAAAGGTTTTGTGCTGGGGAATAATGGCATTCTCTTGCGGTACCTCGGTTGAGGGGATGTGACCATGGGCTACAACATTTGAGGAAGATGGTTCCCCCAATTTTGTATTTATATGTAAAAAGATCTGGCTGGCTAAAGTTTTGATCTAGATAGATAGAGATGTCTTTTTCAAGGGGAATGATTTTTTATTTGTTCTATTTAGATGAGATGGGGTTTGAAATTGTGAAAAATAGATTTTTGCTTCATGCAAAGAAGCTTAAAAATAAAAAGAAGATGCATCGCATACTGCTGCTTGGTACGATCATAGTCGCACAAATTGATGGCCAAGCTTATTCTTAGATTGGAAAAACTAAAGCTCCTAATTTAATAAATTTCTACAATTATCCGAGAAGGTTAATTTGCTAAAAAAA |
| **HIGH CHLOROPHYLL FLUORESCENCE PHENOTYPE 173 (HCF173)**:  GTTTTGAACAAGCGAATTGGAGCCATAAAATTGTGAAGAGAAATGGGGAGCCTCTAGTTCTTGATCACGCCCTCACAATCGCTCTCTCTGCTTATCACTCACATCAAACTTTATTGCAGAGTTGCAGCGTTCGGTATGACGCCCATCTTTCTCCTTTGATCTGTGTTTTCCTCGCTATGGCTTCCTCTCTTGTTGCTCGCCTTTCATCCTCACCTGCCTCTACCTCCTCTTCCTTCTTCCCCTTCCAACCCATTTCACAAAGCTTGCCCCTCCATACCCACCATCGCCAGCTCAAATTCCCTTTGTCCGTGCATGCTTCTGCAGGAGATGAACCCCCTACACAAACAAATGGCCCAGAGCCTTCATCAGCATCATCATCTCCATTCGATGCTCCCACATCTACTGTTGCTACATCCAGTAAGCAGCCCCCACCAGTCTCTTTGAGTTTGGAGGATGTGAATCCCGTGGGTCTTGGGCGGCGATCACGTCAGCTATTTGATGAAGTGTGGCGTCGCTTTACGGAGCTTGGACAGCTCACTCGCTCCCCCCGGGATGATGAAGAGTATTCCAGTGTTTTGATCGGCGGACCCATGTGTGAATTCACCATCCCTGGTGCTGAATCCACCACCGTCCTTGTTGCAGGTGCTACCAGCCGTGTTGGTCGAATTGTCATCAGAAAGCTTCAGCTCAGAGGCTACAAAGTGAAGGCCTTGGTACGAAAAGCAGACCCAGAAACTCTTGAAGGGCTACCGCGTTCTGTGCAAATTGCTGTTGCTGATCTCGGTGATCCTTTGACACTCAAGAGCGCCGTGGAAGGTTGCAGCAAGATTATCTTCTGCGCAAGAGCTCGCTCTAGTCTCACTCTAGATCTTAACAGGGTGGATAGGCTGGGTGTCTACAATTTGTCTAAGGCATTCCAGGATTACAATCACAGAATGGCACAAGCAAGGGCTGGACGAAGTAGTAAAAGTAAGCTTTTGATTTCAAAGTTTAGTCAACCAAAGGAGAAAGATGAGTGGACGGTACACCAAGGAACTTACTTCGCTGATGATATCGCTGTCAAGTTTGATGGGGGTATGAATGCCGGACTTGAAATGGAGGAGGATGGGAATGCAGTCTTCTCAGGTTATGTCTTCACGCGAGGTGGTTATGTAGAGCTGGCAAAGAAGCTAGCGCTTTCTCCTGGTGTTTCCCTTGATAGATATGAAGGTCTGGTCCTGTCTGTCTGTGGGGATGGAAAAATCTACAGCTTAATTTTGGAGGCATGCTCCATGGATGACCCTTCTCATAAGATTGTCTACTTTGCAAGGTTCGCCACGCGTCTGGGTTACAGTAGGATAAGGATACCATTTTCTTCCTTCAGGCCTATGAATCCCGAAGACCCAGCTCTAGATCCCTTTTCTGTACATACCTTGGCTATTCGATTTGAACCTCGAAAGCAGAGGCCACCCCCTGTTCGTAATGCTGTTCGTAATGGAAGTGCCACATCAACTACAGCATCTTTTCGAGATCTCAACAGCTTTAAGCTGATAATTGACTACATAAAAGCCTTGCCGGGTGGGCAAGAGACTGATTTCATTCTGATCTCTTGCACTGGAGCTGGCCTCAGCGATGAAGATCGTGAGAAAGTCCTCAAAGCCAAACAGGCCGGAGAGGCTGCTCTCAAGAACTCTGGGCTTGGATACACCATCATCAGGCCAGGACCATTACAGGATGAACCAGGAGGGCAACGAGCTCTCGTCTTTGACCAGGGAAATAGGATTTCACAGGGTATCAGTTGTGCTGATGTAGCTGACATCTGCGTCAAAGCTTTACACAATCCATCTGCAAGAAACAGAAGCTTTGATGTATGCTATGAGTATGTTGCTGAGCAAGGACAAGGATTATATGAACTTGTTGCACACTTGCCAGACAAATCAAATAATTATTTGACACCAGCACTGTCCGTTTTGGAAAAGAACACATGACATCTATGGTGCTTGGGCGACGATCATTGCTGTATCAACAAACAATCAACATCTGGACAACACTTGGTATCTGTATCCATAGAGTTGTTGTGGTGGAACAAGTGGTTGTGATTTTGTGCAAGCATAATCACACCTACATGTTTGTGAAACCAAAAGAATTCTGTCCGCACTGAGCGATATTTACCTCAATTCATTTGTAGCTCTGCCTCATTTTCACAGTGTATGTATATAAGGGCTATCTGTACATACAGGCTCAGCCAAGGAGGGATTAACAGGTCAGATGCCAATTCTATTGAGGTATTTGTATGCATCAATGTGGGTAGTATGGGTTTACTCCCACTTCCATGTATTCTTCCAATTCTGCGTCAGCAGTATATACACCCGGCAAGCCAATATTGAATGGAATTCAGGTTCTGAGATCAATTTGAATGTAGCTGGCAAGTTAATAATTAATGGAATATATGTTCTGACACCAATTTGAGTGCAGATTTACGAGACTGCCATGTGAACAATGTTTAATGCTTGGTACTCATTCCACAATATGAACCAGCGGCACCTGTTTTCGACCTTGCAGTAAAGAGTATACTGGCATAAGTGACAAGTATTGCCTTCATACAGTATCTTCATCTTTATGGTTGCCAGACAAATGAATGCAGAACTGGTTATGTACATTGACAATACATGCATATGAGAGCTGACACATCATCTGATTGTTGCAGTGCTAGCTTGAACAAAATACTCCAAACAAGAGAAGCCTCTGGTGTTAGATGTTAGGTTTACTAGCCTTAAATTCTCTCATCCCAGGCAGATGGTATAATTCCATCTGATTAAGCCATGAAAGTGATATCAAGGCCAGAGAGGAGTTCTCATGGTGGAAGGACAACCTAGTGTAGAAATGTAATTCTTGCACTCATTCACATGCACATCCACACTCTCTCATTAATCCAGTTGATGGATGGTTCAGATTAGTAGCTTTGGAGATAGCCACCCACACCACTTTCAATCCTCATTTACATGCAAAGGTAATGAATTAGACTTTTGAAACCAGGATGGATGACGACAACTTTCAAACTGTTGTCCCCCAAGATTTGGGCTAATGGTAAAGCTTTGGCCTCGTAACCTCTAGGTTGTGGGTTCAA |
| **HIGH CHLOROPHYLL FLUORESCENCE PHENOTYPE 244 (HCF244)**:  GCGTTATCCACTCTTGAACCACATCAAACATGAGGGTGGACAGCCACCCAACTTGAAAATGTGAGTAAAATACGCTCTTCCTTACAGCGGCGCTAACCCACACACACGCTAGTGGGCGCTTGAAGGGGAGCAAGCAGAGAGGAGGGAGCTATACGTTGCCCCTGTGTTTGCGTGATTATTGTTGGTGTGTTCGTGTGTATTGTGAGTGAGTGTGTGTATTGTGGGTGTGCGTGTATTTTGCAGCTATGGCAGGCCTGATGGTTGCCCAGGCCCCCACCTTCCATAACCTCTCATCGTCTCCCCCTGCCCACTCCCCCCCTCTGGCTTCTTCAACAGGATCGCCCTCTGAGCTCTCCATCAACTCTGCTTTCTGGGGCTCCATCAAGCTTAACTGCTCTCCTTCCCCTGCTTTTTGCAAAGCCTCCACCAAAGCAGATAGGCGAGCAGCCAGTTTATCAGTGAGATGTGATGCCAACAAGGTCATGGCAGCAGCAACAGCCATGTCAGGGACTCCTGTAAGGTCAACCAGCATATTAGTAGTAGGGGCCACTGGGACTTTGGGTCGTCAGGTCGTGAGAAGGGCTTTGGACGAAGGCTATGAAGTTAGGTGCCTTGTACGACCCCGCCCTGCACCTGCTGATTTTTTGCGCGACTGGGGTGCCACTGTTGTGAATGGTGATCTAAACAAACCAGAGACATTGCCAGCAGCCCTTGTAGGAATACATACAATCATCGATTGTGCAACAGGTCGACCTGAAGAGCCTATACGGACGGTAGACTGGGATGGAAAAGTGGCTTTGATACAATGTGCGAAGGCTATGGGAATCCAGAAATTTGTGTTTTTCTCTATCCACAACTGTGAAAAACATCCGGAAGTGCCCCTAATGGAGATCAAGCGCTGCACAGAGAAATATATTGCAGATAGTGGCCTCAACTACACTATTGTGCGACTGTGCGGCTTCATGCAGGGCTTAATTGGACAGTATGCTGTACCTATATTGGAAGACAAGTCCGTTTGGGGAACAGATGCTTCAACTCGAGTTGCTTACATGGACACCCAGGATATAGCACGGCTAACTCTCTCAGCATTGAGGAGTGATAAGGCAGATCGAAAGCTCTTTACTTTTGCAGGTCCTCGGGCTTGGACAACACAAGAGGTGATCAGTCTTTGTGAACGGCTGGCTGGTCAAGATGCGAAGGTGACTACTGTGCCCGTCGGAATATTAAAGTTAACAAGAGCAGTAACTCGCTTGTTTCAGTGGACCAATGATGCGGCGGATCGGTTAGCTTTTTCAGAGGTGCTAACGAGTGATGTCGTCTTTTCTGCTCCAATGACGGAAACGTACTCCGTCCTTGGTGCTGATGCCAAAGACACCACCACTCTTGAGAAATATCTTCAAGAGTACTACACAAACATTCTCAAGAAGCTCAAAGACCTGAAAGCTCAGTCCAAACAAGGAGATTTCTACATCTAAATGTAAATGTGAGACTTGTACATCAAAAACCCTGGGTTCTTGTCATTTCCCTTGTACTTGTGTAAGGACACACATCATTGTACTTGTAAGGACACATCATTGTACTTTTGGACATTGGGTTAGCATATTGTTTCCGAGTTTTCTCTTTTTCTGAAGAGGCTCTAAGCCGACGAACTCCTTCCGTGTTCTATACTTCTGATGTATCATCATGCTTCCTCCAAACCTGTAATTTTGTCAGCTTGTCTTGATGCATCATTTGAATAGTTTTTTGAGCTAGCAACTTCTTTTGTGAAAAAAA |
| **CYCLOPHILIN 38 (CYP38)**:  GTTTTTTTGGAGGAGGGTTCCGGAAGGAGGGCATGTGGCTAGTTTAAAGCAATGGAGTGGGGACTTCTTATCCACTATCTGGCTGAGGTGGCCAAATGCACAAATGAGAAATTTAAACATGCAAGGCGAGTGATGGTGGAAGCAGAGGAGTGTGCTTGATCGCTCTCTCTGCTAAGCCAGCACACGAAAGAGGAAGCCAGGGTTAGGATTAGGTTTAGGGTTCTACCATGGTTCCCGCTACAGTTCTTGGAGCTCCCTCTTCCTGGGTTTCTGCAGCAGGTCGCGCCTCTCCCTCCTGTGAAGGAGCCGGCGCGCAATCTTTGCTCCCCACGTGCTTGCGATGGAGCGAGCATTTCTCTACGGAGATTTCTTTGTTAGGTCGAAGCAGCTTCAGCTGCAGGAGCTCTGCTAGAAGGACCTCGCCTTTCACAGCTTTCGCCCACTCCAATCAGGGGAAGGAAGAGGAGGAATGTTGTTTAATGAGGGTTGTACAAAAATGGGCAGTATGTTTGATGGCATCAGTAACGTTGGCTTCCGTGCAACCCTCATCCTTGCCAGCACAGGCACTGGTTACAAATCATATCTTTGATGATCTCGCTATACTTATTTCAGGGCCACCTGTGAAAGATCCTAATGCTTTGTTAAGACATGCTCTACCTATTGACAGTAAGCCGTTCAAGGACATACAAAAGTCACTCGAAGATATTACAGACAACCTGAAGCTTGCAGGAGCAAAGGCATTTGATCCAGTTGGACGGAGTGTTAGACAAGCTGAAAGGGCGCTTAGCCAGAACAAGTCGGAGATAATTGCCAATCTGGCTCCAGCAAAGAAGGAAACTGGCCAGGCTTTATTGGATAAGCTCAGTGTAGGCCTTCAAGAGTTGCAGAAGATTGTGGAGGACAAAAGCAGGGATGAGATTGCACCAAAGCAGAGGGAGCTTTTGTACATTATGGGAGACTGAAAGTGTTCCTGGGGCGTTGCATTTCTGCAGTGTGGAAGAGGCTATGGTGGACAAGTTCCCATTTGAGGTACCGGAGGAGTATGCCAACAAGCCTCTATTGAAGGGTAGAGCAACAGTGGAGATGAAAGTTAAGGTCAAGGACAACCCGAATTTGAAAGATGTGGTTTTCCAAATGGTGCTGGATGGCTACAACGCCCCAGTCACTGCAGGGAATTTTGTAGATCTCGTTGAAAGGCATTTTTATGACGGCATGGAGATTCAAAGAGCGGACGGCTTTGTAGTGCAGACTGGTGATCCCGATGGACCTGCTGAGGGCTTTGTAGATCCTAGCACGGGGAAGATCAGGACAATACCCTTAGAAATAATGGTGGAAGGGGACAAGCAACCTATTTACGAAGCTACTTTAGAGGAGCTAGGGCGCTACAAGGCCTCGACAAAGCTCCCTTTTAATGCTTTTGGGACCCTTGCTATGGCACGAGAGGAGTTCGAGGACAATTCAGCTTCTAGCCAAATATTCTGGCTTTTAAAAGAGAGTGAACTCACTCCAAGCAATGCCAACATCTTAGATGGGCGATATGCTGTGTTTGGCTATGTTACTGAAAACGAAGAGCTTCTTGCTGACTTGAAGGTAGGAGATGTCATTGAGTCCATCAGAGTTGTAGCTGGACTAGACAATCTGGTCAATCCAAGCTACAAAATCTCTTGAGTTGCATTGCTAGCATTTTGGGTGGCAGTACATTCCTGTAAGATGCAGTATATTCTTGTGAGATGCGGTCTATTTTAATGTGTTGTGCCTCTCTTAGAGGGATGGCATTTTTGCTTGAAAAATTAAATTCTTGAAGAAGTGTGTTTTTGCAAAGCTTTTCAATTAAGCATCAAGTGTGTTTTTGCAAAGCTTTTCAATTAAGCATC |
| **LIGHT-HARVESTING CHLOROPHYLL B-BINDING 2 (LHCB2):**  TTTCAGGTCTAATAAGATGGCGATGAACATTTCAGGGGAGCAGTATCGAAGCTTGAGAGAGAGAGGAAGGTAGAATGGCCACCATGACCTCTGCATCTGCGATTAGCAGCTCTACATTTGCAGGCCAAACGGCATTGAAGCCCCAGAGTGAACTCTCGAAGAGAGTCGGCAATGTGGATGCTCGCGTTACCATGCGGAGGACTGTGAAGAGCACTCCCGAGAGCATCTGGTATGGCCCTGACCGCCCTAAGTACTTGGGCCCTTTCTCTGAGGCAACCCCTTCGTACCTCACCGGTGAGTTTCCTGGCGATTACGGGTGGGACACCGCAGGACTTTCTGCAGATCCGGAGACTTTTGCCAAGAACAGAGAATTGGAAGTGATCCACTCGCGCTGGGCGATGTTGGGTGCCTTGGGATGTGTCACCCCTGAGCTCTTGGCCAAGAACGGTGTGAAATTTGGAGAGGCTGTGTGGTTCAAGGCTGGCTCACAGATCTTTGCCGATGGTGGACTTGACTACTTGGGCAACCCGGGCCTTGTGCACGCACAGAGCATTCTCGCTATCTGGGCATCCCAGGTTATCTTGATGGGCGCCGTGGAGGGATACAGAGTTGCAGGAGGGCCTTTGGGAGAGGTTGTAGACCCCATCTACCCAGGCGGGCAATTTGACCCCCTGGGCTTGGCTGATGACCCAGAGGCATTCGCAGAGTTGAAGGTGAAGGAGTTGAAGAATGGGCGCCTTGCCATGTTCTCCATGTTTGGGTTCTTCGTTCAGGCCATTGTGACAGGCAAGGGCCCCATCGAGAACTTGTCCGACCACTTGGCCAACCCCGCTGTTAACAACGCCTGGGCATACGCCACCAACTTCACCCCCGGCAAGTGAAAATTTGCTCCTTTGTAGTCTATCGCACTCGGGTAGCCGAAGCTTTCGCCTCCCTGCTTGTACCATAGTCTTTAAGTTGATTGCCTTTTCTTTAGTCTTTTTTCTTTTTCTACGACATTGTTTGCCAATTGTGAATGCGGCCCTTTTGCAGCAGAAACGTTTACACGCATAATTAGATTACACTGCACCAGTTTATTATTTCATCTAGTGTTTGTTGGTTGTATTTTGGCCCTTGTAAATGAGCTGCGCTATTGCACCTCCAACCACCCTTTGGAGGTGCATTAAGCCAATCACTGCGCTGCAACACTTTGTTAATCGTGCGTGAGAAGCCGGGGCGCATGGAGAAGCCTGGGGGCATGGATAAGTCTGAACAACCTAATGGGAAAAAAATCCAATTTAAAATGAAGTTCAAAATAAAATGTGCACGAGTGCCTACCGTTTGTAGAAAA |
| **PHOTOSYSTEM I LIGHT HARVESTING COMPLEX GENE 1 (LHCA1):**  GAGAGAGAGAGAGAGAGAGAGAGAAGACTGACAGGCAAGATAAAGCTTGATTTACAGTCACTCAATGAGAAAAGCATCCAATTGAAACTAAATTGCATAATGCTACACAACCGTGGAAGACTTACTGAAACCGGAAGTAGCCCGGTCGGTAAAGTGTTTCAATGTTAAGTTCTAGGTGTAAGCTCGAACGTGTGATGGCACTACTCCGAATGATGCTCAATTTTGGTTATGGGTGGCCATTCGAGACCTCTCCATCAAAAAATAAAAGACCGCCCACGACATAGTATATAAGCACATTTAATCTTTTAAAAATTCCTTCTTTTCTTATGGTTAAGCTCCAAAGTTATGGGAAAAACTTCCTAGTAATTGAGGGCATTTAAAGGTAGAAAGACAAATTTTCAAGTACCACTCTCAAAGAACCAACTCGAAAATAACCACATACAAATGAGGCATATGCTCACACACTGAATGAATAAACCAACTTCTCGTCAGATATTAAGAACAAATGTCGAAAGCCATGTGCACTTCAAACACTCGGTGGGTCATGTGAGTGAAGCCAATTTACAATACACTCCTGGGAATGATAATGTCTGCGATATTCTTGTGCCATGGATCGGCCAGGTGGGCAGCAAGGTTCTGGAGGGGGCCTGTGCCTGGGTAAGCAGCTGCCTGAATCGAGAAGCCCACAAATGCCAAGATGGCCAATCGACCATTTTTCAGCTCCTTAACCTTGTACTGCTTGAAGGCTTCAGGGTTTTTGGAGAAGCCAAGAGGGTCGAAGGGGCCACCAGGGTACTTTCTTTTCTCAATGTCTGTCTCATCATTTCTTTGGGCCTCAGCGAAGGCAATGGCAAAGATTTCGAAAGCGAGGATGAAGGGCAAGTTCCCCCATGGCACAGGGTTGCCCAAGTAAGTGGCTTGGCCTCCCGGAGTTGCCGCCCACTTCTGTGCATCTACCCAATTTCCAAGACCCAAAGCCTCGGGCACAAGTACACCGGGCACAGCGAGCATTGCCCATCTGCAGTGAATGAGCTCCGACTCTTTGAAGCGTTCGAAGTTCTCTGGAACCTCAGCCAAGCCTAGAGGGTCAAACCCAAAATCTCCAGGGGAGGAGCCATCGAGATGGGCAGGTCGAGGCTGGCCGGGAAACCACTCAGAGGAAGCCATGAAGACGCGAGAGCCATTGGAGCAGGCGAGCGCGGGTGTGAAAGAGGAGGCGCCCAAGAACTTGGACTTGGAGAGAGGCAGAGAGAGGGCGGGCACCAAGTGTGAGCACGCCACGCTTGTAGACGCCATTGCAGCTTCTAGACCCGCTTCACGCTTGCTCTGCGCACCCACACTCGCGCGATCTAGCCTCTCTTGCACCTTCACCCGCGTCAACTTTCACTCCCTCTTCCTTATTTTCCGTGGATATCTTCTTGTAAGATAGGCCCAATCTCTCATGGGCGCTTCTCATTGGCTCCTTTGTGGATGTATGCTCTCTCTCCACCACCAATACTTTTATTTCTTACCTTAGCTCTCTCAACCAATATTATTGTTTATTTTCTTGACAGGACCCTCCTTATTGGCATTGTGG |
| **LIGHT HARVESTING COMPLEX PHOTOSYSTEM II (LHCB4):**  GGAAAAGTGGGCAATGGGAGGGTGCCAAGTAAGCAAGGAGGAGATAGAGCATGGGATTCTCATCCACAAACGAGAAAGATAGGGTGTTGTATAATATGGATAGTGTGTGTTTAGAGTGTGCACGGTGAAGCATACTCATATCTGATCCGTTGGTGCAGAGAATTGAAGAAGCTCGCGAAAGAGAGAGAGAGAGAGAATGGCAGCGACTTCTCTGGCTTCCTCTTTCTTGGGTACTCAGGAGCTCGTGAAGAGCTTCGGTGTGAGCAGTGGGTCGCGCGTGGTCTGCAAGCTGGGCTCCAAGAAGAGCGCAGCTAAGCCAGCGCCCAGAAAGAGCAGCGCAGGAAGCAAGGATAGGCCTTTGTGGTACCCAGGCTGCAAACCCCCTGCGTGGCTAGATGGCTCTCTTGTGGGTGATTATGGGTTCGATCCCCTCTCTCTCGCCAAGCCCGCAGAGTACCTGCAATATGACTTCGATTCCCTCAACCAGAATCTTGCAAAGAACCCTGTCGGCGGCCTTATCGGAACTAGGGTTGACAACCCTACCAACATCAATGCTACCATCCAGCCCTACGCTGAAGCCTTTGGTCTCCAGCGCTTCCGAGAATGTGAGCTCATCCATGGCCGCTGGGCCATGCTCGCTACCCTCGGCGCCCTTTCCGTCGAGGCCTTCACCGGTGTTACCTGGCAAGATGCTGGAAAGGTGGAGCTTGTTGAGGGAGCTACTTACTTCGGACTGCCCCTACCCTTCTCCATAACATCCCTTGTATGGATTGAAGCCCTCATCATTGGATACATTGAGTTCCAGAGAAATGGGGAGCTAGACCCGGAGAAACGCATCTATCCAGGTGGCAAGTTTTTTGACCCCTTGGCTCTTGCTGCAGATCCAGAGAAAAGAGAAGTGCTCAAGCTTGCAGAGATCAAGCATGCCAGACTTGCTATGATTGGTGCCCTTGGTTTTGCTGTTCAAGCTGCTGCCACTGGCAAAGGGCCTTTGGACAATTGGGCTACCCATTTGAGTGACCCCCTGCACACCACCATCATTGATACCTTCTCTAAGTGAGCAGGGTCCATCTCTCTCTCAAAGCATCCTATGCCTCCCTAATGTACTATCCAGTGTAACTAGTTTTTTGAATGAATACTGAATTTGTTTACTTACCAACATGACAATGTAGGGATGTGGTCTGATGCATGCAGCCTGAAGCATTTGTGGTTGCATTTAAAATGAATTGCTACCTTGTTTTTGTCCATGTTCAAAAAAGTTCAGTGCAGAATTTTTGGTAAAGAGCCATGTGTAATAAGTTATTCATGTAATTTTTCTACCAATTTGGGCTAGCTTGCGTCCATGTTTGAGTAAAAAAA |
| **SUPPRESSOR OF QUENCHING 1 (SOQ1):**  GGCCACGTAGGATATCTGTCTTGAATCATACAACGTAGTCGTTTATCCACAAGCAGCAGTGCATATATCATACATGTTGTACTCGCGCACTGCCACCCCTTCTCTTCCCAAGCTTTCCATGGCTTCTTCCTCCTTATCTCCTTGCTTCTTGTCCTCGTCATCTTCCTTCCTTCGCCACCGCTCACCCTCCTCTGCACCGTGCCACCCTCTTCTACAGCATCTCTCGTACCCATCACGGCCTTCTTCGCCTTTCACATCCTGTTATGCGCCCATGCATCGCATGTGTTCTTCCACGCAGCTCATTTGCGCTTTCTCAGCTTCGCCTGCTGGTGCCAGCACCTCCAATGACGAGCGCACGAATGCCTCCGATCGAGTCTCTGCAGTGCTTTTCGACATGGATGGTGTCCTTTGCAACAGCGAGGGGAGGTCGCGCTTGGCCGGCGTGGACCTTTTTGCAGAGATGGGTGTGCAGGTTTCTGAAGCAGACTTCTTTCCTTTCATGGGAACTGGTGAAGCCAACTTTTTGGGGGGTGTGGCTCAGGTCCATGGAGTAAAAGACTTCGATGTTTCTTCTGCAAAATCTCGTTTTTTCCAGATATATTTAGAGAAGTATGCAAAGCCTAACTCTGGTCTTGGATTTCCTGGAGCATTGGATTTGATTATGCAGTGCAAAGCTGCAGGTTTGAAAGTGGCACTTGCTTCTAGTGCGGATCGACTCAAAATTGATGCTAATTTGGCAGCTGCGGGTCTACCTTTTTCTGTCTTTGATGCCATTGTGTCAGCAGATGCATTCAAAAATTTAAAGCCATCTCCTGACATTTTTTTAGCAGCTGCCAAAGCCCTTGATGTTCCAACTATTGAGTGTGTGGTTATCGAGGATGCTTTAGCAGGTCTCCAGGCTGCCAAGGCAGCAGGAATGAGATGCATTGCTGTCACTACGACTCTGAGCGGTGATAAGCTTGTCCCAGAAGGTCCATCTCTTATCAGGAAAGACATCGGCGACATACAGCTGGATGACATCCTCAAACTGCAGGGATCTGGTAATTCTGAAACATATTCTCAGTGTGAAGTTGTCCCTACGCCTTCAGCACCAGCTTTAGGCATTCTTGACGAAGAGGTCCAACTTCCAGCTGGGTCAGCTGTGACTCGTAGGAATGCCCTGAAATATGGAAGCCTTGCAGTTGCATTGTCGACCTCTTACATCGCTCTCACACATTGGAAGGCTATGTCCTACACATCCCCAGAGGCTCTTCTCAATGCATTTGTTGGCCTGTTTCAACCATCAATAGCAAGTGGGGCGGATGAGTCAGATCGTGCTGCAAAATACTTGAGCTACATTAATGATTTGGAAACTCGTGGGGGAGGACAGCAGGTACCGGAGTTTCAGTCTCAATTGGAGTGGCTTAACACAACTCCTCTTAAATTAAAAAAGGATCTGGTGGGAAAGGTGGTGGTTTTAGATTTCTGGACATATTGCTGCATAAATTGCATGCATATTTTGCCAGATTTGGAGTACCTAGAGAAAAAGTACAAGGGTAAACCGCTTGCTGTGATTGGTGTTCACTCTGCCAAGTTTGACAATGAGAAGGATTTGGGTGCCATTCGCAATGCTGTTTTGAGATATAATGTGACACATCCGGTTGTAAATGATGGTGATATGGTGTTGTGGCGAAAGCTGGGTGTAAACTCATGGCCCACTCTTGTGGTTGTTAGTCCTCGAGGAAAAGCTCTTGCTGTAGTGTCAGGGGAAGGCCACCGCAAGGATCTGGATGAGTTAGTGAGTGCTGCTCTTCAATATTATGGAAACAAAAAACTCTTAGATGATCGGCCTTTACCCGAGCTTTTAGAAAAAGACAAAGACACACGCTTGGTTTCCTCACCCCTGAAGTTTCCTGGCAAACTTACTACAGACCTTGCCAATCAGCGACTTTTTATTTCCGACAGCAACCATCACAGAATAGTGGTTACTGATCTTGAGGGGAACTTTATACAACAAATCGGTGGTACTGGCGGTGAAGGCCTACAAGATGGAAGATTTGAGGAAGCTGCCTTTAACAGACCTCAAGGTGTAGCTTATAACTCAAGTAAAAACGTTTTATATGTTGCAGATACAGAGAATCATGCGTTAAGGGAGATTGATTTTGCCAATGAAACTGTGCGCACACTAGCAGGAAAGGGGGTGAAGGGATCTGATTACAGAGGTGGAAAACAAGGAACATCACAGGTTCTCAATTCCCCTTGGGATGTCTGCTGTGATTCTGCCTCAGGCACTGTCTATATTGCTATGGCAGGGCAACATCAGATTTGGCAGCATACTTTATCAGATGGTATCACAAAAGTCTTTAGTGGGGATGGCCGCGAACGCAACCAGAATGGTAAAAGGGGTCAACAAACATCATTTGCACAACCGTCTGGCCTCTCTTTTTCTGCAGATATGAAAGACCTTTACGTGGCAGACAGTGAGAGCAGCTCTGTCAGAAAAGTTGACTTAGCTACAGGAGGCTCAAGCTTACTTGCAGGAGGGGACCCAATTTTTGCAGATAATCTCTTTCAGTTTGGTGACAAAGATGGCACTGGATCTGCAGCTCAATTTCAGCATCCGTTGGGTGTACTTAACGGTGTTGATGGCCTTGTCTACATTGCTGACTCTTATAATCACAAGATTAAAACTATGGATCCTAGCAGCAAGACGGTTAAGACAATAGCAGGCACGGGAAAGGCTGGGTTCAAGGATGGAACAGGCTTAGGATGTCAGCTATCTGAACCAGCTGGACTTGCAATTGGGCTTGGTGGGAAGTTATATGTGGCAGACACAAACAATAGTGTCATTCGAGTTCTAGATACCAAAGGCAATAGCGGTCCATCAATCTCTACTCTTGAATTAAAGGGTGTTCAGCCTCCCCAATTGAAGACAGCTGGAAAACCAAGACGCCTTCGACGTAGATCTTCAAGTGACATGGATGTGATAAAGACAGAGTCAGTTAAAGGCAGCAATGGAAGTATCAAGATAAAAATTGCTTTGCCACCTGGATATCATTTCACTAAGGAAGTCACTAGTAAATTTGAAGCAGATGCTGAACCTGATGGCAAGGTCGAGTTAGACCCATCTGCAGGTACATTTGATGCCAATGGACAAGCTGTTATCGGATTCTCACGATCTCAGGACGCATTGGCAACTATACAAATCAACTGCAAGGTGTATTACTGTGAGGAGGATGAGGTGTGCCTCTATAAAGGGCTTGCCTTTCAAATACCTTGTGATGAGGTTTCCTCATCATCTTCAGTGGTTTTGCCACTGACATATAATGTAAAGCCACCGGTTCGACAAACACTATAGTAGACATTTCAAAACGCCTAGATTATTTTGGTAGGTATTGAAGGGAAGTCTGATTCTTTTGTATAATATCCATTATGTAAACCAAAAGAAAGCCTTTTGTAATCATATTCAATGTAAGAACACCATTATTGCGTCATGAAAATCGACAATGAAAAAACTCCATCTCTGATGTTGCGCAAAAACCGTGTTAATCTATCTGATGTGGTTGTGGC |
| **ENHANCER OF VARIEGATION3 (EVR3)**:  AGAGAGAGAGAGAGAAAGAGAGAATGGAATCAAAGAAACTACTTTTGTTGACCAGCTGGATCTTGCTTCAAGTTATTTTACAAGGCCCTCTGCCGAGTGACCTGAAAATTGTGTAATTCGTACAAGGAGATCATCAATGCTTATCTGCTATTGAGTGTGTATAGTAGAAGACTGCGATTACTCTTACGCAGCTCATCTTGGGGTGCAATTAGCTGTAACTACGTTGAAATGGAAAAACACTACCCAGGTTGAACAATGTGAGCTATGTACATTTACCTGCCTTAGATAAGAGGGGATCCCAATCCGATACCAAGCTCTTCAGCAAGTCCATCCCAAAGAGGTAACAAAGTGAGAAGAACTAGTATAAAAGCCACCGCAGATGCACCCTGCCTCCATGTCCCCACCTCAGTAACATCATTCAAGCATGGCTTCTCAGGTTCTCTTTGGCAGATCAAAATGTAAAGCCCCCATGGAAGCGAAAGAGGTCCTCCTAGCACTCCAAGACCTAGAAGTAAGTATGTCCCCAATGCAAAGCCTGTCAAAGCGCCCTTCCCAAATGCTGCCTGCATTGCCCTTCCACCATCTAAACAACCAACAGGAAGAAGGTTGAATGCTGTTGTGGTTAATCCGCACCAGCCTGCAAGGACCAGAGGATGAATGGAGACCGTAGCTGCATGCATGGCATCATAGCCAAGCACACTTCTGCTAAAATACCCTAGTAGTAGTGATCCTTGAAATAGCAAGCTGGGCACTTGTACCAAATCGCTGGCAGCTTCGGGGCTTGTAGAGAGCAAAAGCCCCACCCCGAGCATGGCAAAAGACAGGAGTCCACCTGCCAGGGGGCCCGCTAATGAAATGTCAAATTTTGCAGTGCGGTCAGGAAGGATTGATCTGAACTGTGTGATGGCCCCAAAACTACCAAGAGTTATGTTGGGAATAAAATACGGAATTCCAAGCTTGACTTTTTTTCGAGAAGCAGCAAGAAAGTGTCCAACCTCATGGAAGAGTTGTACTCCAAGAACTCCATATGTAAGAGGCATAGCAGCCTCCACATATGGAATCAAAGTGTTCAGATCTGGCGGTTCCACAACCTCTGGATTTGTGAAATACCGCACAACTTCAGGCGGCAACTTTGAAAGCTGTGATGCGATTCCAAGCTCCAGACAAGAGCCTGCTGTTGTGACAAAGAGTACAAAAGCTATCACAAACTGCCACAAGGTTGTGGACTTCGGTTCAGAAACTTCTCTACGTAGTAGCACAAAACTGACTCGAGGGCCTCCTCGAGGATCTAATTCTTCTGAATTTGGTTCCTCCACCATAAACAGAGTATACTTAGAGCCAGTCACCTCCCGCAATTGCCGTTGAAGCTTTGCAAAGACTTCTTCCCTTTTGCCTCTTAAATTACCTAGAAACAGAATTCCTGCACCTAGATCCCCAAAAGGCTCTTGCCCAGTTACCCAAAAAGTGCTATAGCCAAAGACTCTCTCCTTCAACAGCTTCACATCTTCTGGATCTACTTTCTCAGGACCAAGCAGATCCAAAAGTTTAAAGGCATCCATTTGTACATTGGCATGTTCTGGTGCACGGGTGTGGTCTGTCTCCTCAGAAGATGGTGTCGAAGGCTTTGGTTTGGACTCATCAGGCTCTTCTGTCGCCACCGTCGTAGAGTTTACGCTCTCTTGCTCATCATCAGGCCCAGTGGCATGACACCGGAACCTGCTCTCATTCTTAAATTTAAGGCCGTCGAGATTTCTGCAAAAATTTCTAAACCGAGAGCCCCCATTACCGCAAAGCTTGCAGGTTGCAGAAACTCCTAGAGATGCCTTTCTGAAGCTGAACTGTGCTTGTCGTTGCAGCTGATGGTGAGAGCAGGCGATGGTTGTGATGGGTTTTCTCAATTTTATCAAGCAGCAGCATCTGGCGGGAGCGTCTTCTGAGCTGGATATGGTGGAGGGCAATCCATAATAAGCAGAGCAGAGAGAGACGCAGGAAGACAAGGGATGAAAGCAGAACTCGGCGTCTGCAGGCTTGCAAGGTCTGTTCAGCGATGGAGCTCGGAGAAAGAAGGGGGCACCACCAGACAAGCTTGTGGTAGCAGCCATGTCTATGCAAACCTTCCTTGAAGGCCTGCTGCCTAAGAAGTTGATCAATGGATTGTCTTACATTTTGGTCACACTCCTATCA |
| **FTSH PROTEASE 1 (FTSH1)**:  CGTTGCTCTTCCCATATACACCAGGGGGTCAATGATGACTACATATCCTCCCAAAACATTTCTGCATGTGAGATGATAGCATTTGAAAATATACATACCATCTGCAACTACTAAAAACCATTTGGGCCCATCAATTCAGACACCTAAAAATGATCACTCAATATGACCTTGTCTACAAAAAGGTTAAAACTGCATGATCAAATCCCATTGAGCTTGCCAACTATCAGGGTTTGTAGATACATGATGCATTAAAAGAATGATGAGGCCGTTTCCAACATATACGTGGAAACTTACAAGACCAGAAACATTTAAGGCTGGTTTTGGCACACAAGGACCCATCAAGTTTGAAATTTGGCAAAGGGGCTCAAGTACTAGAAGATAAATCTTTGTTTGAGATTTAGTACACATGACCAGCATTTAATTTTCAATAATAATTTGCTCTGGGTACCTTTTTTCTAGGGCCTAGTCAAACAGAATACACAAAATAACACGAGTAATTTCTCTACATATAACATTATGAGCTAAATCATTGACACAGCATTAAGCGACGAACAGCTCAGCCTTGCTGTCCATGAAGAGGCTCATGAATTCCTCACCATCCACACTCTCCTTTTCAATTAGCAAGTTGGCCAGCTTGTGGAGAATGTCAATATGCTTGGTAATGATGTTTTTCGATCTAGAGTAAGCCCGTTCTACAAGCTCCCGCACTTCAGAATCAATCACATCCGCAGTGGCCATCGAATAATCAGATTGTTGAGAGACTTGTTGTCCTAAGAAAGGGTTTCCTCCTCCTCCTCCAAGTGCAACCTGCCCTATCTTCTTGCTAAAACCAAACCTCTCCACCATCTGCCTTGCAACCCTCGACACTTGCTGAAAATCGTTAGATGCACCAGTAGTCACATTATCTGCCCCAAAAATGACCTCTTCTGCCACCCTTCCACCCAAGGCTACTGCCATCTGATTTTCCAAGTAGCTTCTACTGTATAGCCCGGACTCCAATCTCTCCTCACTGGGAGCAAAGAAGGTAAGCCCTCCAGCACCACCACGAGGAATAATGGAGATTTTGGCCACGGGATCATATTCTGGCATAAGCGCGCCAACAAGAGCATGCCCAGCTTCATGGTAAGCAACAAGTTTCTTTCTCTCTTCCGACACCACAGCATTTTTCTTCTCAGGCCCAGCAATTATTCTTTCAAGTGCATCCGCAATCTCATCCTTGCTTATCTCTTTTAAATCTCTTCTTGCAGCTAGGATTGCTGCCTCATTCATGAGATTCTGCAGATCAGCCCCAGTAAAGCCAGGAGTCCTCCTGGCAATTTTATCAAAATCAACATCTTTGGCTAACGCTTTTCCCCGAGAATGGACCTGTAGAATCTTGACTCGACCTGCTACATCTGGTCTGTCTACTGTAACCTGCCTGTCAAAGCGACCAGGTCTAAGAAGAGCAGAATCAAGGACATCGGGCCTGTTTGTAGCAGCAAGTACTATAACTCCACTGTTTCCAGTAAAGCCATCCATCTCAGTCAGCAGCTGATTGATGGTTTGTTCTCGCTCGTCATTGCCACCACCGAGACCTGCACCTCTCTGTCTGCCCACAGCATCAATCTCATCAATGAAGACAATGCAAGGAGCCTTGGCCTTGGCCTTTTCGAATAGGTCTCTCACACGGGAGGCTCCCACACCAACAAAGAGTTCTACAAACTCAGATGCCGCACATGAGAAGAAAGGAACACCAGCTTCCCCTGAGACAGCTCTGGCCAACAGCGTCTTTCCAGTGCCAGGAGGTCCAACAAGGAGGCAACCCTTAGGGATTTTAGCCCCTAGAGCAGTATATTTGTCAGGATTCTTCAGAAAATCCACCACCTCTTGCAGCTCGAGCTTGGCTTGATCAGCGCCAGCCACGTCACCAAATGTCACTCCCGTTTCGGGAACCTCTTGAAACTTGGACTTAGAGCGACCAAAGTCCATGGGGCCACCAAACCCACCCGGGCCACCTGGACCACCCTGAGCACGCCGGAAGAGCAGGAAGAGACCACCAAATGCAAGGATGGGGAACAGAAGGTTACCTAGAATGTTGAAGAGGCTATTATTGGCCTCACCTTCAGAGACAGATATGTCGACCCCATTCATGGCAAGGATGTCAACAAGGTCGGGATCATTGGGAAGTGTCACATTCGCCCTCCTCCCATCCACTGCAGTGAGTTGCAGAGTGGTTCCATCCTTGCTGAACCGCACCCTCTCCACCTTACCCTTCTTTACTGCATTCAGAAACTCACTGTAGCGCCACTGAGTACCCTCTGGAAGATCTGACTTCACCGGTGGTGCAGAAAGCGAGCTTCTAGTGAAAGGATTTAAGTTTTGCTCCGCTTGCTGTGCCTGCAGGAGCTGTGGGGGCTGAGAAGGCGGGGGTGACATGTCTGCAGCTATCGCGGGAAGTGACGAAAGGGCTGCCAGGGCAGCAATGGCGGGTAGCTTGAGAGAGGGACATGCTGTTTCCGATGGTTTCATAATGGTAGCTCGCGTGACAGAAGCTCGACAGGTCCGGAGGGGCCGATGAAGAGGGATGAGAAGGGAGCTGCCATGAAAGCTTGAGCGTTCCAAAAAGGGGTGAAAAGGCAGAGAACTTGCAACCGCCATGGCAGCTGAACAAGCCATCTTCGACTTCGAGTTCGTGCACGCTTGCTCCTCCAAAGAAGAAGAAAATAGAGCAGTCTATCTGCC |
| **HYDROXYPYRUVATE REDUCTASE (HPR)**:  TTTTTTTTTTGCAGATAAAAATATTGAATCTCCATTTGAGCAAAAGTGCACTGAATGTGGTGTGGATGGTCAGAGCTCTCTAGCTGTCTGATAGCAGAATTTCCATAAGAAGATTTCTCTACATTCCTTATTTGGACAGTTTAATGTTTCGAAGCTGTCCTTTTGATTCGGATAACACTGACACACGGATATTTTACAGTACCATATGCAGCTACATAAGCTTCGATAAAGATTAGTGGATTGGATGCTGAGGAACATCACAAACTACACAATTTCAAACATTGCATTCACATCACAAATTGGAAGCTGCCGAGGTTTTGAGACCTAAGTTTTTGGCATTGACAATGCTTGGGCAAGCAGCAGGCGGCTTGGAATCTTCTTGGAGGAAAGGGGCAACATTGTTGGCATCATGCCAGATAGGATACCCTTTCAGCTTGCCCAGAACATTTAAAGCTGCTAAAGTAGCCATGCCCTCACGTGTCCACTTAGAAGCAGATGCAATATGTGGCACAACAACTGCATTGGGGAGCTCAGCAAGCCCAGGCTTCATGAAGGGTTCATCCTCAAATACATCAAGCGCAGCTCGAAACTGTGGATTGGCTTGCAAATGTCGAACCAACGCAACTTCATCAATAATTGGTCCTCGACTTGCATTCACTAGTATTGCCTCCTTTTTCATTACAGCAAGGCGATCCTTGTTGATGAGATGAAAAGTGGTTTTATCCAAGATAGGATGCAAGCTCACCACATCAGACAACTTGAGCAAATCTTCAACTGTCTGGACTCGCTTCCATGTAACTGGACTTTCCCCTTGGGACTCGAGGAATTGGCCATAAGCTGTAACAAATTTTTCAAGTCGAGTTGCTTGATAAAGGTCATAGTAGACAACATTCATCTTAAAGCCTTCAACCATCATCCTTGCATAAGCAGAACCAATCCTTCCAGCACCAATAATGCCCACAGTCTGGCCCTTTAATAAATTTCCAATAAACAGATTTGGAAGCCAGCCATCATATTTTCCAGCTCGCATGAAGGAATCAGCTTCAACCAGCCTTCGTGAAGCTGCTAGTGTTAATGAGGCCGCTAGCTCTGCTGTCGTTTCCGTGAGCACACCTGGTGTGTTGCCTACAGCTATGCCATTGCGTGTTGCTGCCTCCACTTCAACATTATTGTACCCAACAGCCATGTTGCTGAATGCATGGCCTCCAGCTCTCTTCAAAGTAGAAAAGAGAGCATCTCCCCATTCCTCAGTAAGCTGGCCGATGACACCATCGCACTGGGTTCCAATCAGACGTTTGATGTCATCAACACTAAGGATAGTCTTCTTTTCTGTGCAGATCTCAACGCGGCAGCCACCATCGACAAGGAGGTTGATCCAGCGGGAGCCAGGCATAGGCTTGGTGCTGACGACGCGCAAGTGGCCATTAGGATTGAGGACTTCAACAGAGAGAGGGGAGGAAGACATAGCCACAAAGCCCTTGGCCTGGCAGGAGCGTGAGGGAGCAGCTACCAGAGAGACGAAGCGGAAGAGCAGGAGGCTCAATCCATCCCGCACTTTAATATCGCACTTGTTGAGATAGGGTAATAAAGGGCTCATTCTCAGCCTCACCTGCATTTTGCCCCCCTCTTTACTTTGCCACCTTACATTATCACCCTCTTATCTCTTTAACTCCAAAGTTCGCG |
| **HYDROXYPHENYLPYRUVATE REDUCTASE 2 (HPPR2)**:  GAGAGAGAGAGAGAAAGAGAGAGTAAGAGAGAGAGAAAGAGATGCCTATTAGAGGAATGCCAACCAAGGCAGTATTCCTCCGTTGGTTTACTTTACACGGGAGTTAAAAGGGGCTGCCCAGAGAAGTGAGCTTCAAGGTTGGAAACAACTAGATCTGCCATACCCCTCCTGGTTTCCCAAGTGGCACTTCCAACATGAGGAGTCAAAACAACATTATCCAAGGACATGAGTTCAGAAGGAACATGAGGCTCATCCTCAAACACATCAAGCCCGGCACCTCCGAGACGGCCCTCCACCAATGCCTTGACGAGATCAGCCTCATCTACAATAGGACCTCGGGCAATGTTTATGAGATATCCATTTGGACCCAATGCATCCAGGACTTCCCGGTTGATGCTGCCCCTGGTTTCTTCAGTCAGGGGGCAAGCAAGTATTAAAACATCTGATTTGGCAGCAAGCTCTGTCACAGTAGGATAATATGTATAGGGTATGCTTGGCTTTGAAGATCTGCCTTGATATGAAATTGGGCACCCAAAAGCTTCAGCACGCTTTGCTATGGCCATACCAATTCTTCCAAGCCCCACAATTCCTACTCGCTTTCCACTTGCCTTTGTGGTCAGTATGAAGGCATTTTTGACAGGCCAGCAGCCCTGTCGGACAAACTGGTCAGCAGCTGGGATTCGGCGCAGGCACGCAAGCATAAGGGCAAGTGCGGTGTCAGCCGTGCAATCAGTAAGGACGTCGGGGGTGTAGGTGACGGCAATGCCACGTTGGCGACACTTGGGAAGGTCGATTTTGTCAAGGCCGACGCTGTGGGATGACACAATTTCGAGATGTGGGAGTGCATCAATAAGGGGGGCACTTGCGCCCACAACTGTATTGCACACGAGGCCTCGGATGGAGGCTGCGTGTGCGGCAACAAAGGCGGCATGGTCAGGAGCTTCCCAGAGCTTGAAGACAGAGAAGCTGTTCTCCAGCGATGGTACCATTGTGTCGATCATGGGCTGCGTCAGCAGCACCCCAGGCCGAGCCATCCCACACCCACACAAAGAAGCAGCCTCAGCCTCAGGCTTTTTACTGGTTGGTTTTCGGCGCTCCTCCCACTCACACACTCCTTTTAATGTGCATGGGTAGCGAGGC |
| **GLUTAMATE:GLYOXYLATE AMINOTRANSFERASE 1 (GGAT1)**:  TTTTGAACATAGTGCCCTGGGCCTCACATTAGTTGGGTGTACACTACTTGCCATCCATTGCTAAGAAAAGACAAGATCATGACACGTGGAATTGAAATTGTTTAAACATTCTTTTTGGGCTGCATGTAAGGTACATCTGATTTAGATGTCATGAATGCCAACTGACTACACTAGCTAAAGGTACTACTGTAGTCTGTAAGCTGAGGAGCTGACATTTGAAGACAGTTGTTCTGAAAACTGCAAAGTAGTGAATGCAGCATTGTCTTTATTTCCCAACTTGGATGATAAAATAAAAACCTGGCCTGCTTGGCATTAATTACATAAGATGAATAGTGCCCTGTCTGCTTGGCATCGACTATACAGCATGAATAGTGTTAACCTCAGGGTAACAGCACTCATAATAGAAGTCCAGAAGCTTCAATACATAGTAGCCCAAATCTACCCGATAGTTTGTTGCCGTTTTTCAGCAAATCGGTATGCGATTCTTTGCAGGACACACGGTTTTTCCATAGCCTTCTATATGACAACAAGGTCCATCTTTTGTGCACTACCATAGTGTCAGTATAGTAGAATACTGGGACGGAGTAGCAAATGAAGAAATACTTGTCCTTCTAATTATGAAATAGCCCCCTCATAATTTAGATAGAGTCCTGGATGGCCCCTCATACTGTGCCATAAAATTCTCATTGAAATTTTTGAACAAGTCCATAACTTCTGGCATATCTTCCTCGGCTGGTAGAATCGTAGTCCTTAGATGAAATGTACCGTCTTTTTGGCCAAAGCCCGATCCGGGAACTGTTGAAATTCCAGTAGCCTCAAGCAGCCTTAAGCAGTAAAACACATCTGGTGCTTTACCTGCCTTTTTGGCAGCTGCTATGGCAGCCAGTGGCAGCTTCACTTTTGGAAACGAGTACATTGCACCTTCAGTGAAATTACAAGTAATGTTTCTGCAACTATTAAAGCCATCTGTCATCATATGAGCACGCTTCCGTAAAGACCCCAAAGTTGCCTCGCTCTCTTGGGCATATATAGGATAAGAGGTCTCTCCTGGCTTTGGGGGGTTGACCATCAGTCCCACAAAAATTTGACCTGGTACATTCGGACTGAGGGCAATGGATGCCACTTTGTACAGTTCATCCACTGTCTTTGGGTGAATATTTGTCAGTTCAAAATATCCGCCACGCTGACCGCACTCGCCCCAATAGCCTTTTGAGACCGTATGAAAAGATATAAGCTCTACTTCTTTGCTGAAGGGAGGACCCATATCCATCAAAACCTTCTTTGCACTTATGAATGGTCGTTCATCCTGATATATGTTCAGCTGGTACACTTCATCAGCCAGCATCACAATCCTCTCTTGATGACAGAACTGAATGAGCTCCTGAAGATTAGCTTCTGAAAGACATTGCCCTGTTGGGTTTCCAGGGTTGATGAAGACCAAGGCACGCAGAGTTATTCCCTTCTTCCGGGCTTCAAAAACTTGGTGTCTCAGATCTTGAACATCCAAACCCCAATTAGCTTCCTCATTTAGATAATAAGGGACTAATGTCCCTCCAACCAGTTGAATTGTTGCAGAATATAGAGGGTATTGTGGTATGGGACAAAGCACCCCATCCTTGTCATCCCTAACGATGATATTGAGAAGCTGCATCACGCCTTTACTAGCCCCATCAGTGAGAAATATCAACTCTGGATCGCTTGGATATCCATCTCGTCTCAAAATAAAGTCTGCAACATCTTTCCGTATACCAGGTAGTCCTCGTGAATCACTGTAAGCACCTAGACCCCCCGATGTGTAAGATAAGTAGTGCTTTGCTCTAGAAATGGCATCAGCAGGGAAAAAAATGTCCACGTTTGGATCATCCATAAGAAAAGGGGCTTGACAAAGTGCAATCACCTGACGAGGAAATGTCAGTGGCTTTTGCCCCAGGCCATGGGGGTTGCCTACATTGGTGAAAATAATCTTTTTGCCATCCTTTTGCAATTCAGAAGCTCGGATGTAGAGCTCTCCACGTACTGCATACACCATCTTCTGTATGTTGGCATTGATAGTATCCGGATCAAGCACTTTCTTGGGCGCCATTGAAGCACAACTCTCTCACACGCGCGCACACACACACACACACATACACA |
| **β-CAROTENOID HYDROXYLASE 1 (BCH1):**  GGAAGTTGCTCAATGAGAGCGCTCCACGTGGGCGAGGAGATTGCGGCGGCTGTAGCTGCTTGTTCGATCGAGCCATCGCTGCAGAGAATTCGTTATGAAGCAGCCCACATTTCCGGCAGACATTCCTTCGTCATTTCCAAGCTTTTCTGCACTTGGGCTCCAATCAGAACATGGGTTTCAAGTCCCCTTTCTTATCCCCTCACATTTCCATCTCTCCTTCCACAGCTCTATTCCGCCATCGCCTCTTCTTCCACAGCAGAAGAGCCCTTCATTTTCACCCCCTCCTCCCTAAGCAGAATGCAGTTATTAGGATGGTTGTTGGAGAGCGCCATTCTACCGGCATCTTTGAATCTGCAGAGTCCTTGGCTGCTTCGGAGCTTCCCCCCCCAGCCGCGTTAGTCGAATCAGTTGTGCCCTCTGTGGAGCTAGGAACTGCGACAAGAATATCTGAAAAAAAGAGCAAAAGGAAAGCTGAGCGCATGGCTTATCTCTTTGCTGCTGTCGCGTCAACTGTCGGCATTACGTTTCTAACTGCGGGCGCTGTCTACTATCGCTTTGCTTGGCAAACCGAGGGCACTGAAATTCCTTTGTCTGAGATGTTTGGAACATTTTCCCTAGCAGTGGGTGCATCTGTCGGTATGGAATTTTGGGCTCGATGGGCACATCGCGCTTTGTGGCACGACTCTTTATGGAGTATGCATGAGTCCCACCATCGACCTAGGGACGGGCCCTTCGAATTAAATGATGTTTTCGCCATTATCAATGCTGTTCCTGCCATCGCCTTAATGGCGTTTGGTTTTTTCCACAAAGGGCTAGTTCCTGGGCTGTGTTTTGGAGCTGGCTTGGGTATCACAGTCTTTGGTATTGCATACATGTTTGTACATGATGGTCTAGTTCATCGGAGGTTTCCTGTCGGTCCAATTGCAGATGTCCCTTACCTCCAAAAAGTTGCTGCTGCACACCAACTTCATCATGCAGACAAGTTCAATGGTGTACCTTATGGACTTTTCCTTGGACCCAAGGTTTCTATGTAAACTGAATTTCAATTACTGATTGAATGCTGTTGAAGTGGTATTGCAAGTTGGAGGAGCTGAGGAGCTTGAAAAGATGATACAATTGAGGAAGAAAAGGGCCAACCATTGAGTCTTTAATGTGGCAGGATTCGAGTTTTTTCGAAAAAACTTGGCAATGGATGATATACATAGGGTGGGCTTTGCACAAACTGTTTGCTCTTTCATTGAGTCCTTCATGACTAAAATTCTTGTTTCCAGTATAAGATTGGTGAGGAGTACCCAATGGGTACACGCATGCTAAAACGATGGAGATCAAGAGCAGAGCGGAAGGGTATTCGCGTGTACGATTAATCAGATCCATGTGCTCACTTGTTTTAAGAGAGAGAGAAGCCTGACATTATGCTCAATAGTAATTTATTCAGATGTAAAGAAACAACCATAAAACAAGTTTTTTCAAATAATTCTAGGTTTGAAGCCAAAGGAATGCATCGAATGCAGAACAGGTCTTGAGTTTTATCTTTATCTTTGCTTTGAGATCGAG |
| **LUTEIN DEFICIENT 5 (LUT5):**  GATTTGGGTACCCTAGATCAATGGCTGAGAACTTGCCCATGGAGGCATGAATCACGAATGATGTAGCCAGGTGTCATTCATGAACTGAGGGTGTTATTTTTCCACGTTGCTCTCTGAATTTCTGAGTGAGAGGTACTTACGACTGAGGTAATCGTCGAGGTCGCCATGGAAGCTGAGAGGTAGCAGACTCAGATGATAGCTGCTTGAAACTTCCTTCTGTAGCTCATTAAAGCTTCAATGGCGAGCTTGCAAGCTGCACCAGCTTTACAAGTCGTGCCTCCTCTGTGTAGTCTCCACCAAGATGGTTCTTCGACTTCGTGCCTTCGTTTCCTTTCAGACAGGCGAATTAAGCCTCTCTCCATCTCCATCCACACTTCCATCTTTCCGAGCTTCCTCCCCTCCTCCTCCTTTACATCTACTTTGTCATCTTCATTTGTTACAAATGCCTCCTCCAAAGAAAATGGTTCTCAAGACGAGGCCCCTGATGCGGCCATTCAAAATCTTCAAAGGTTACTGGCCTCAAAGAACGAGGGGGAGCTTAGAGAACGCATACTGTCTGGCGAATTTTCAGTCGGCTCTTCCAAAAGCAATATGCGGAAGGCACGCGAGGTTTTAATGACATGGGGGCAGCTCGGGCGCAGCCTTGCATACTTATTGGCAAATTTGGAGCGAGGTTACCTGTTGCGGCAGGCCAGGAAGATGCCTGAGGCAAGGGGGAATGTCAAGGCAATTACTGGACAACCCTTTTTTATACCCTTGTATGACCTGTATTTAACGTATGGGGGCATCTTCAGGCTTACTTTTGGACCCAAGTCGTTTGTTATAATCTCTGACCCTGCAATAGCAAAGCGTCTGTTGAAAGACAATTCAAAGGCTTATTCGAAGGGTATTCTTGCAGAGATTTTGGATTTTGTAATGGGAAAGGGGCTCATACCTGCAGATGAGGAAGTATGGCGTGTTCGACGACGGGTGATAGTTCCAGCTCTGCATAGAAAGTATGTTTCGGAAATGGTTGGCTTATTCGGTAGGGCAGCACAAAACCTATGCCAGAAGCTTGATGTTGCTGCTAGTAATGGGGAGGATGTGGAAATGGAATCATTGTTTTCTCGCCTGACGCTGGATATAATTGGAAAAGCAGTCTTCAATTATGACTTCAACTCATTGTCGCTGGATACAGGAATTGTAGAGGCTGTGTACACTGTTTTGCGAGAGGCGGAAGACCGAAGCATAGCCATCATCCCATATTGGGACATTCCTATAGTCAAATATCTTTCACCAAGACAGAAGAGGGTAGCAGCATCCCTTCAGTTGATCAACAAAACTTTGGATGATCTTATTGGTATTTGCAAGAAAATGGTTGAGGAGGAAAATGTGAACTTCAATGAAGAGTACATGAATGAAAGAGACCCAAGTATTCTGCATTTTCTCTTGGCTTCTGGTGATGATTTTTCAAGCAAGCAGCTCAGAGACGACCTAATGACTTTGTTGATTGCTGGTCACGAAACATCTGCTGCAGTTTTAACATGGGCTTTCTTTCTTCTGGCAAAGAACCCTGCTGTTTTGGCCAAAGTTCAGCGTGAGGTGGATCATGTACTTGGGGACAGAACACCCAACATTGAGGATATGAAGAAGCTTAAATATACCACTCGTATCATCAATGAGACATTGCGGCTGTATCCACAGCCACCTGTTTTGATTAGGCGATCATTGGAAGAAGACATTCTCGGGAAGTACTATATATCTAAAGGAGAGGATATTTTCATTTCTGTATGGAATCTGCACCGCTCTCCAACTTTATGGGAGGATGCCGAGGAGTTTAGACCAGAAAGGTGGCCTGTAGATGGTCCCGATCCAACTGAAGTGACAGAAAACTACAGATATCTACCTTTTGGGGGTGGTCCTCGCAAATGTGTAGGAGATATGTTCGCTACCTTCGAGAACATCACAGCTGTAGCCATGCTGGTTCGGCGTTTCAATTTTGAATTGGCTTTAGGAGCACCACCGGTGGGGATGACCACAGGTGCCACAATCCATACAACTGCCGGCTTAAACATGACTGTAACTCACAGATTAAAGCCTGTAGTCATTCCTGTAACGGGAGGAACAACACTAACTACCATAGATGAGAATGGCTCAATAAAAAGCTATACGCCCAGCAATGGGACTGCAACACTTTATACATCTCAGAAGGAAAATCAGGGAGCTCAAAAAATAGGACCTTTGTAAATATAATCGGTAATGTGGTAATCAATTTTCTTTCCTGCAATGTTGTGCGTTTCTTTGGAAAAGGGAGTTACGAGAGGAGCAAATGCAATGATTGCAGCCTGCTCCCTTGTGGGGAGTTCAAAGATAATGTCTTGAGTTTCACGGATGATGAATGCCTATGAATGTACCTGAGGGGGGTGCTATGAATGAAGTATCATCACAGTGCCTTTGCTAGTCACATACTGCAATGGGGGCATAAACTTGTTTTGAAATGGTTTTATAGCTTTGAACAACTCAATCATCCAACCTCATTGGGCCAGTGTCAAAGTTGGGCTTGGTTGATACTCACAAAGGGTCTTAACGTAAGAAATCTTGAAGCTTCCAGCAGCACAGCTCATGCAAGGAAACTTTGAGGACCAGACTGATTTTTCAGTGAACAGAACCCTCCCTCGGCACCTTGTCATTACTGTTGTATAACGATTACTATCTTCACAAACCTATTTTTTAAACTTCAGTCAAGCCGTGTACTCCACCCCTACATTCAAAATTTACTGTACCTCCTTTGGTGAACTTTGGAGTGAGTGCTTTGGTAAATATTTTGATTCAATATAAAGCAATTCAGGAAAGGCTGGCAATTGCATGTGCTGCCCCATGTGAAAGGCCAGAGTTTTAACATTTTATATTGGCCTTCAAATGCCGAGTGCAGATTGCCTTTTGTGGTTTTGGAATGTCGAAGTCGAGACAGATTGCCTTGAGTATGTTCATCTGCTTCTCTACTTTGTGCAACAAGTTTACAATGTAGTCATTTTTGTGTCACTTTGGTGACTTAATAGAACTGTACCCATCTGAAAGCCCCAGTACCAGCATTCTACTTTGAACTGAGAATCATGCAGCTATGCATTTACTTTTTCCTGATAATTCTGTACAGAACCTCAACCATTTGGTCAATGCTCAATAGGATGGGTTGATGCTAGGCTTCCTGTGTCCGGTGTCGCAATTGCTGTGCTGCTCGGTAATTGAAGGAAACTGTTTTTTGTATCTCAGGATTTTATGTGGGGCGCGCATCAACTCTGCCTTGCAGGCTCTTTTGTTTTGG |
| **VIOLAXANTHIN DE-EPOXIDASE 1 (VDE1):**  ATGGAATGCTCTCGAAACAAAGCATCCTAACCATGAGCTTGGACGCAGCGAAACTTGCAGAATGGCGCCCCTCTCCAGCTCCTGTGGCGCTTCGTTACACTCTGAAGCACGATGGGCAAGCCTTCCCTTACTTCATGATCATGGTGGGCATTATCGGCATTATCATCTTGGAAGCAGCACAAAAACAAGGACTCTGCATTTTGTGAAACCTCTCAGAGTCATAGCTTCCAATGAGGCAGCATCTTCCGCAAAGGCCATCTCGCGCGCTTGGCCTGTGCTACCCTCACAGCCCATCTCCCTTCTCGCAGGTCTTCTTCTTGGGCTTCAATTGTGGACGGCACCCTCTAGCCTAGCTGTGGATGCCCTCAAAACATGCACTTGTCTTCTCAAAGAATGCAGGGTAGAATTGGCACGGTGCATTGCCGATCCTGCATGTGCTGCAAATGTTGCATGCTTACAAACTTGCAACAATAGGCCTGATGAGACAGAATGCCAGATAGGCTGTGGAGATGTTTTTGAGAACAGTGTGGTTGACCAATTTAATGACTGTGCCGTATCGAAAAAGAAGTGTGTGCCTCAGAAGGCGGATGAAGGAACGTTTCCAATCCCACAACCTTCAGCACTTGTCCAAAAATTCAATACCACTGATTTCAGTGGAAAATGGTATATCAGCAGTGGTCTCAATCCAACCTTTGACACGTTCGATTGCCAATTGCATGAATTTTCAACATCTCCAAATAAGGTGACTGGCAAGCTTACATGGAGAATAAAAACTCCAGATGGGGGCTTTTTCACACGCTCTGCAATGCAGAATTTTGTGCAAGACCCAAAACAACCAGGGATACTTTACAACCATGGCAATGAGTTCCTACATTACCAAGATGACTGGTACATCTTGTCTGCCAAGATGGAGAATCAAGCTGATGATTACGTCTTTGTTTACTACAAGGGGCGAAATGATGCATGGGATGGCTATGGAGGGGCGGTCGTCTACACACGGAGTAAAGTACTTCCTCCAAGCATTGTCCCTGAACTGACAGCAGCAGCCAAGAAGGTTGGGTTAGATTTCAACAAGTTCAGAAGAACCGATAATACGTGTGGGCCCGAGCCTCCCCTTTTTGCAAGACTAGAGAAGAAAGTTGAAGAGGGGGAGCAAGCACTTGTGCAAGAGGTGAGAGAAATAGAGCAGGAGGTTGTGAATGTGGGCAAATCTGAAATGACATTATTTGACAGGCTGAAGAAAGGGATTTTAGAACTGAAGAAGGACCAAGATTATCTTCTTAGAGAGCTGGGAGATGAAGAAAAAGCCCTCTTGAGTGACTTGAAAATGGAGGCAGCAGAGGTGGAGAAGCTTTTTGGAAAGGCACTGCCCATAAGGAAACTGAGGTGAAGCCAGTATATTTACACTTACCAAATTATCATGGTGCAACATCCTTGTTCTTATTGGGTCTTGGTTATCAGCATCAAAGTTTGATACTGTTGGAATCGGATGATCACGAACAAATGGTATCTTTTGTATTATCATGTTCATGAGTAGACGTGTTCTATCATTGACGAGCATATTTCATTGTGTATAATCTTGATGTACATCTCCAAGTCCTCCTCACTTGTTACCAATTGTCGCAGTTGACACTCCAAGTAGGATGACGAGATGGAATTTGCAAGATTGAGCAATTGTTTCTCGCTTTTGAAGTTAAACTCGGGCAAGAGCATATTGTAGAAGAAACCTTCAGTTTGGTGGCTAGGGTGGAAGTTTGTGAATCTTACAACTTGTTGATTTTTCTCGATGTGTTGGTCATTAGCATTAGTCCCAATTGTTCTCTTATTTGTTGGCGATTACTTTTGTATTGTCTATGATACTCACAAAAGGTTAAGTACTCAAGGCATGATGGTCTTGTGATGTATATATCAATAGAGCACATTACTAGGTTATGATGCCTTGAAATCATCCATTGTCTCATGGATGGTGGTGAAGAATCAATAGATTTTACAATTTCAC |
| **LONG AFTER FAR-RED 3 (LAF3)**:  GGGGCAAAGTATATATCAATCATGAACTTTGAATAAAAAGAGAGAGCAAAGCTAGAGTGTTCTATGATATTTACAATTATGAAACATTTACTTGCTGTCCCGATCATCATTCTTGCTCAAGAATAACTAAACACTGAAAGCTCATAAAATGGAATGCTATGGTTGATTAAACTTTTGAAAACACTTTGATTCCTCCCTTGTAAGTTGCTAAGACACTTATTTGATCTAAGTTCTTAAAAATGTTTCCAGAAAGCACAGCAAAATCTGCAAATTTTCCTCGAGATAAGGACCCAATGTCATCATCCATAAAGCTAGCATATGCTGCAGACGTTGTGTACCCTTCTAAAGCTGCCTTGACATCAATGCATTCTGCTGGTATCCATGAGGAATTCCAGCCTGCAGGTGTCCTTTCTTTAGCTGCCTGCATACCTCCTAAAGGATTAAGATGTGCCACAGGCCAGTCTGAGCCAAATACAAGAGTTGTCTTGGCCAGCAATGACTTGAACAAGTACGATTCCTTGAGAGCTCTCTCTTCTCCAAGTTTTCTTGGAGCAATGTAAGCATCATCTAGCAAGTGCTCAGGCTGCATTGAAGCTACTATGCCTTGAGACCCAAAAATCCCAAGAGCAGTTTGTGATAAATGTTGTGCATGCTCAATCCTTAACCTTCGATCACGATGACCATTTGTAACGTTCAGAGCTTGATATAAATCCAGTATCCTATCATTTGCAGCATCTCCAATAGCATGAATCGCTATTTGCAATCCTCTTTTGTCTGCCTCTAGCATATCTCTCATGAGGGTTTCTGGATTGGTCACTTCCAGCCCAAAGTTGCCTGGATCGTCATTATATGGCTCATTGAATAAAGCAGTCCCAGATCCCAGTGATCCATCTGCAAATGCCTTCACACCTCCAACTCTTAGATTTTGGCTTAGCTTTGGGCCTGTTTGTTTTATTTGCTTATCAACATCGGACCATGTCCCAAGAGGAAAGAAAACATGTACTCGTAAAAGAAGATTACCCATTTGATCTGCCCACTTGTAGACGTCATGGAAATCATCCCAAACTTTTGTTGTTGGCAATCCAGGGAAAAACCTTCCAAAGTCAACAACTGCTGTAACTCCCTTAGATAACGCCTCCTTGCTTGCTCTAGTAAGAGCATCTCTTCGTTCTTGAGCTGTAGCTTCAGGAATACAGTCGACAACAAATTTCATTGCTGAATCAACTAGAATGCCAGTCAGCCCACCATCTTTTCCCCTGATGAAGCTCCCACCCTCAGGATCAGCCATGCCCTCTGTTATCCCCGCAAGTTGCAAGGCCTTTGAGTTTGCAAGTGCCATGTGACCATCCATTCGATAAATCCATACAGGAACTTCTTTTGTAAAAGAATCAATCCATGATGCACTCGGCAACTCTCCACCCCATTTTTCATTGTTCCATCCACCTCCTAGAGCCCACTGTCCACTCTTTACTTCTTGCACACCTAGCTGAACTTGCTTAATAAAGTCACTTTGGCTGCATGTATCTTGAAGTGTGATTTGCAGCATCTGAAGTCCCCCAGAAATCAAATGAACATGTGAGTCTATGAATCCAGGTACTACAAATCTTCCTTTCAGATTGTGATATTTGGTATTTCGGCCAGTCCTTGCCTTAACCGTGTGGAGGGATCCAATGTCAAGGATGCGGCCTTTGGAGAGGGCCATGGCGTTGGCCCATGCCATTCTTGGGTCACCCGTAAAAATGGTAGCATTTGTAAAAACTACATCAGCAACAGCTTCGGGAGCGGGAGCTCGGAGCAAGAGGTGGGTGGCGATGGCGAAGCAAAGGGGCAACACGAGTAGCAGGCAGAACCGTGGTGCATCCATTTGCCCAAAGCTGGCGATATAGCAGTTTATGTGCGCATTTGTGGGATATTGATACTACTTAGAGAGAGAGCAAGCATTTTCAAATAGATTGTGGAGTATGTTTGTGGAGAGAGAAAGAGAGAGTGATGTCCAAGCACTCAGGAGCGCAGCCCTAGACACGCAACTGCTTTGCTCTCGTCCGCTGCCCGAGCTTCCCTGGTTTTGGATCTTCACCTTCACTAGCCAGGTCCAAGCAGCCCACCCAAGTTTGACTTCTCAAGGAGTGTCTAAGTTGTACTCCTTCATTGCTTAACATTTTTGCCTTACTTCTTGCAACTTGTGCGGAGTTGCTATGCCAACTGCACTTTTCCTCTTTCTTTCTCTTCAAAGCAACATGACAAGGAGAAGCCTCTTAAACATGACCACCATTAATTAGTGGATGTTCACTTGTATCTATCCCTAGTTGAGTTGACAATCTATTACTTGAACCATCGAGTAG |
| **PHYTOCHROME B (PHYB)**:  CCCCCCCCCCCCCCCAAAACCCCCAATTTTCGCTTGCTGATCGCTCGCCCAATTCCTGCAGCATGTCCTCCAAAACCATGACCTACTCGTCTTCTGCTGCAGCCGCTCGCAGCAGCGGCTCTTCTGTCGTCCGCTCCAAACACAATCGTCGCGTTGTGGTTGCTCAGACCACTGCAGATGCAAAATTGCATGCAGTGTTTGAGCAAGCACAGTCGGAGGGTGATACAGACGGCAGCTCCTTCGACTATATGCGCTCCATTGAGGATGCCCGAGACTCTGTTTTGAGTGAGAGAGTTCCTGCCCAGGCGGTAACAGCATATCTCCAGCGAATGCAGAGGGGTGGCCTCATTCAGCCGTTTGGATGCATGCTTGCAGTTGAGGAGGGCAGCTACAGAGTCATTGCTTTTAGTGAGAATGCTGCGGAGATGCTGGACCTCATGCCACAATCAGTACCAAGTATGGGCACTCAGAATTTCTTGCTCGGCATTGGCACGGATGCCCGCACCCTTTTCACGCCTTCAAGTGCTGCTGCTCTGGAAAAAGCCTCGGGTGCCGTTGATGTCTCTATGCTTAATCCCATCACTGTTCACTGCCGCAGCTCTGGTAAGCCCTTCAATGCTATCGTTCACCGTATCGATGTTGGTTTAGTCATTGATTTCGAGCCAGTTCGGCCATCTGACGTAGCCGTTTGGGCTGCTGCCGGGGCCTTGCAATCCCACAAGCTCGCTGCCAAAGCTATTTCTAGGTTGCAGGCACTTCCAGTAGGGGATATCGATCTCCTTTGCGACTCTGTAGTGGAAGAAGTAAGGGAGCTCACAGGGTATGATCGCGTGATGGCATATAAGTTTCACGAGGATGAACACGGCGAAGTTTTGGCTGAGATACGGAGGTCCGACTTGGAGCCCTACTTGGGATTGCACTATCCTGCTACCGATATACCACAGGCATCTCGATTCCTTTTCATGAAGAACAGGGTAAGGATGATATGTGATTGTCGGGCAATCCCTGTAAGGGTTATACAGGACAAGGAGCTAAGGCAGCCTCTGAGCTTAGCGGGTTCTACATTACGAGCGCCCCATGGATGTCACGGTCAGTACATGGCGAATATGGGATCAATTGCTTCACTGGTTATGGCTGTGGTAGTCAATGATAACGATGAGGATCTGAGCAACAGACCTCATCAGCCCAAGATGCGGAGGCTTTGGGGACTAGTAGTTTGTCATCACACCACGCCCAGAGCTGTCCCGTTTGCACTCAGATCAGCTTGTGAGTTTTTGATGCAGGTATTTGGTCTTCAGATAAACATGGAGCTGGAGCTTGCTGCTCAGATGAGGGAGAAGCACATTTTGCGCACACAGACTCTTCTCTGTGACATGCTTCTCAGGGATGCACCGATTGGGATTGTGTCAGAATCACCCAACATCATGGACCTTGTGAAGTGTGATGGAGCTGCTCTGTATTATGGGAAGAAATTCTGGGTGCTTGGAACAACTCCCACGGAGGCTCAGATCAAGGATCTTGCAGAGTGGCTTCTCGATGTCCACAGAGATTCCACTGGTCTGAGCACGGACAGTCTTGCGGATGCTGGATATCCAGGTGCAGCTGCGCTAGGGGATGCTGTTTGTGGAATGGCTGCGGCAAAGATTACCACCAGTGACTTCTTATTTTGGTTTCGGTCTCATACGGCAAAGGAGATCAAGTGGGGGGGGGCAAAGCACGATCCGGAGGACAGGGATGATGGCAGGAAAATGCACCCCAGGTCTTCTTTCAAGGCCTTCTTAGAGGTAGTGAAAAGGAGGAGCTTGCCTTGGGAAGATATGGAGATGGATGCCATCCATTCTTTGCAATTGATCCTTCGAGGATCGTTCCAAGACATAGATGACAGTGATACTAAGACAATGATCCATGCACGCCTAAACGATCTCAAGCTTCATGGCATGGATGAGTTGAGCACTGTTGCAAATGAAATGGTACGTCTTATAGAAACAGCTACGGCACCTATATTTGCAGTTGATGCAGGTGGGTTTATCAATGGGTGGAATGCCAAAGTGGCAGAATTGACAGGTCTTCCAGTGGACGAGGCTATGAGTAGGTCCTTGGTGAGAGACGTGGTGGTGGATGCATCTATGGAAACTGTAGAGAGAGTGTTGGATCTTGCACTGCAAGGGCAAGAAGAACAAAATGTGGAGATTAAGCTCAAGACATATGGTGATCAAGTGGATAAAGGGCCAGTAATTTTGATTGTGAATGCATGTTCGAGCAGGGATTTTACAGACAATGTGGTTGGAGTGTGTTTTGTTGGTCAAGATGTGACGGGTCAAAAGGTAGTAATGGACAAGTTTACTCGCATTCAGGGTGATTATAAGACTATAGTACAGAATCCCAATCCTTTAATACCGCCCATTTTCGGGGCTGATGAGTTTGGGTATTGTTCTGAGTGGAATCCAGCAATGGAGAAGCTGTCAGGTTGGAAACGCGAGGATGTTATTGGTAAAATGTTGATCGGGGAAGTGTTTGGTTCAGAGTTGGCCTGCTGTAAGCTGAGAGGGCAGGATTCTATGACCAAATTCATGATAATTTTGAATGCTGCAATGGGCGGACAAGACTCAGACCGGTTTCCTTTTGGCTTCTTTGACCGCCACGGTAAGTATGCAGAGGCCCTTCTGATTGCCAATAAAAGAACTGACAGTGATGGGACGATCACTGGAGTCTTCTGTTTTCTTCATACTGCTAGTCCAGAGTTGCAACAAGCCCTACAAGTTCAGAAGCGCTCTGCACGGACAGCCTTAGATAGATTAAAAGAAGTCGCTTACATGAAACAAGAAATTAGGAATCCTTTGTATGGAATCATCTTCACACGAAAGCTGCTGGAGGGCACTAGTCTTTCCGACGAGCAAAAGCAAATAATGGAGACGAGTGCTTTATGTGAGAAGCAATTGCAGAACATTCTGGATGAAGACAATTTTGAGAAGCTTGATCAAGGGAATGTTGACCTGGATACATTAGAGTTTACCATGGGCACGGTGATGGATGCTGTAATAAGCCAAGGAATGATTAGATCCAGGGAGAAAGGACTACAGCTCATAAGAGAAACCCATGTCGAGATTAAGAACACATGTCTTTTTGGAGACCAGTATCGTCTACAACAAGTGCTGGCTGACTTTCTTACCACAGCTGTGAGATTCACATCGTCATCAGATGGCTGGGTGGGCATCAAAGTCGTGCCAACCATAAAGAACATAAAAGACGGATTGCATATAGTGCATTTTGAGTTCAGAGTGTCACATCCTGGTTCTGGAATACCGGAAGACCTTGTCCAGCAGATGTATGACCGATCTCAAGAAATTACACAAGAAGGGATGGGACTTAGTGTATCACGGAAGCTTGTTAAATTGATGAATGGAGATGTCAAGTACATTCGGGAACCCGGAGTTTGCTACTTTCTAGTCACTGTGGAGCTTCCTCTTGTTCAAGATGATGACTGATGCCAAGCTTCAGGACGAGGACTTGGGCCTAAGTTCAACATCTCAGCGATTTCCAATGGCAAAACATCGTGTCGTGTGTGCAAGTGACAATTATCTTGTCGCGTATGCACTTTCACCGCTTGGTGCATAGTGCCAAGCATGTTTCAAACTACAGCAGCAGGTGCCCTTGTGTGTATATATACCTGTTGTGTTTCAAACTACGGCTTGCAATCGTGCACTGCGGAAAGAGAGAAAGGCCGCAATGCACATTAGATGTTGCATCATCAAAATATTCAAACTGTTCCTATCAAGGCAATCGAAGCCCAACTATGCACACATACTAGATACCTTTACCAACTACGTGTGTAGATTGAAACATCTTCTCTGTTTTTTTGTCAAATCTACTGCCTGGTTTCCCCAACATACTCTTGGTTGAGAAGAGGGTGGCACATGAAGCCATGTTCCTGCTCATGTGCAAGTAAAAGTGCAGATGAATAAGAGGTGACTTAAACTTTTATCCTGACTATGATTTGGGTATGTGAAGTATTCCTCATCTCTAAAAGAAGAAAGATGGTGTGTCACATGCTTCTACGCAACCTCTCACTCAACCGTGGGCACAGAATTAACACTGTTATGCACAGATTAGATATATGCGGAAGCTGTACTAATATTTGGAAGTATGGTTGCGGAAGCTGTACTAATATTTGGGAGTATGGTTGCATTGATGATGGGATAGAGGCAGCATTGCATGGTCAGGTCAATGAAGTACCAAAAGTCTGTTTGTTGTGTGCTTTTACTCCAGAAGTTGATTTTGTAATAGGCCTTGCACAGTTAATGTTATTCCACCACTAGATGCTAAAATCAATTATTTAATAGTTCCACTGTTAGATGTCTTTTGTTTAGTATGTAGAGGTGGATCTCTGCCACAGGTTGTTCGTCCTCATTCTAAGGGTGCATCGTTGCCGTTCCTTCATTTTCTCCTTGGTTTTTTACAAATAAACATGTATTCTGAAGTGGGTACAAAATGTCAATTCACAACAATTTGCTAGGATAGCACTCGGAAATAACTATTTCCATGTAATCGATGCAAGATTGCAAATCATGTTGTATTTCATTTGATGGTCCTTGGAAAGGAGATGTTAAATTTCCTTCTGTCTAATTAACGAGAGGTACGAGGATGTTTGTGAAAGAGGTGTGCATCAATAGAGGTTAACCTGCTAAGGTATTTGGTGAGAACAAGTTTTTTGCGGCTGCTACCAAAGATGAGGTTGATAATGGGTAAAATGCCATTCTTGCAATGTGCCCTTTCTAATTGGACTCCATCAGGATGTTCGCTTGTTATGACTCAAACCTCCATTGATGGAGGGCTACTCATTTCTATGTATCACAGAGCCCAATGAAGCCTAGAGGACCTTGTAGGAGCAATAGGTGATATGGTGTCTTTGATAACCTAGAGGGTGATGTCTACCAAGATCGAGAGTATTGCTCTCCACAATTTGTTGTATTTGATAGGGTTTCAGCCCTTCGAACA |
| **PHYTOCHROME A SIGNAL TRANSDUCTION 1 (PAT1):**  AATAAAATGCAGCTGAAACAACCTCAAATTCACATATGACTCACTGACAATCACAAATCGGGCGAAGGAAAAACACGATTGTCCCACAGTGAAGTATAACAGGCACAGATGCTATCTGGCAAATTAAGCCTATATAAGAAGCCACTGCTGTATCAGTCACATTGCCCTTCAAAATGCTTATAAGAACGCGCAGAGTTCAAACATGAAACTTAGCATCTGTAATTGAAAGAGCAAGCTGACTTGTAACTCCCAAACAAATTACTGTGAAACTTAATAGCTAGCCAAAGTAAGAGTGCAAGCTTGGACATACTGCCTCCTCTTCCTGTATACCCTGCAGCAAGACTCGTGTGTGCTGTTATATCATACACATTCTACATACATCGTTCAGCAATTTTGAAGGTGGAATAATTGCGAGCACTTATCATGCCACTTGAGCTAAACAACGGAGATGGCCCATGAGTACCAGCAACTAAAAACCAACTTGCTGAGCAGCAGATCTGCTCTGCCTTGGCCTGAACAGAACCAAGGATCCTGCCCGCACATATAGAAAAAATAGCATACATGCACTTAACCCTTACAAAATTCTAAATAGCCATGGACTGGCTAGCCAAACTAAGTCCTTAAAAAAAAATTAAGAAAAGATTCTGTACCTGGACCTCTTAGCGGTCCTCTTCAATCCAGAATACAATGTTCTCTGGACCAAAACTTCGTGCCTAGGTCATTTCTCCAGCCAGCTGAAAGTATAAGCTTACACTAGCTACAAGCTAGAATATACACTTTCATTCATGATCTAATGCCATGCGGAAGCCGCCATCAAATTTCTGTTCTGCCATCCCAGTACAAGAATCTCGCCGTCTTCCTTCAGCCTGTATTTCTCATTGTAAGACTCGAGGAGGGCCTTGATGGTGTTGTTTACATACAAGCTTAGAGGGTGAGGCCTAAAGCCAGCCATTAACATCCGCGCTCTCCACTTACCTGCAAGCTCATGGCGTTCAACTCGTTGTACACCTTCGCATGCTATGACGTTGACAATGTCGCGAGCCAAGCAATGTTCCTCAACATTGACCCTCTCTTTGCTCTCTCTTGGGAGCGCTACATCAATAGACTCGAAAACAGCTGAGTAGTAATCCAAAGTTTCCATGAACCTTGCCAGAAAAGGGGTTGTGTTGGTGTTGGCATCTTGTTCTACCAAGGTTAGAACTTTTGGGTTAAGACTCTTAGCCATTCTAAGAAGACGATCACGATGATTATCAAGGCAAACATTCTCATCCGGCATATGATGAAGCTGAAGAGCAAAGTTCATTGCCAGAGCCTCTCCAGGCCTTCTTTCTATCATATGCGCCTGCAAACCAGAGAGCACTGTTGAGATAGTGCTAAACTGAAATGGAACTCCGAGGCTACTTGCAAACTTTTCCAACCTCTTCTTCACAGCAAGCATACCACCCAATGGATAAGTTTGAGCTGTAGGATCATCCACAGTACTAATCCGAATATGAGGAGTACCTCCTGGCCTACTCCCTAGTGCTTGTATGAGAGAGAACCACTGTGTTCCTTGATCAATCTGGAAATCAAAAATATGAACCATGGGCTCATCTTTAAAGGCTTCCGCTATTGCACCATTTGCCGCCATATAGGCGAACTTAATGTATGGGCAGATTTCGTAAAGCTTCTGCATGGCGGACAAAACTTCAATTGCAGGAGCTTCCCAACACTTCAAAGCCTTGTAAATGGTGGAGCCGGAGGCATGAAGCCTTGCTACAAGCCCCTCAGACATGTAGGCAGCAAGTCTATCTAAGGGATCTCCATACACAGATGCAGTTTTCCGAAGATCTTGCATTGCCAGCTCAGCTACATCCATCTTTTCTTCGGATATTGCAGCAGCACATGTGACGAGAAGGTTCTTGACACGGCTGCCGAGATTCAATGCTCCCAATGACTGCTCAAAAGTAGACAAGCCATCCAATGGAGATGTCACTGCACATTTCTCCTGGTCTGTTTCTTCTGCGATTCCTAGATTTTCCTGAAGAAGATCATCAAGAAGCTCTACCCAAGAGCCTCTATTCTCATCTAAAAGCTCGTTCATATCTGCATCGTCTGCATCTGGCTCCATAAGTGCATTTTCCAGCTCATGCAACTTGTACACCAAGGCTTTACTATCACACTCAGGAGTATCCTTGGCAGATGCTAAAGCTGAATCTACTACATTTAAGTGCTTATCGGAAAATGTAAGAGTAGAATCAGGACTCTCAACAGAAGACGATGCAATTCTTTGAGATACTTGATTGTAATGTGAGCAGCTAGAAATCTCATTTTTGTACATATCGCTATCATATTGATAGTCAGAGCTGGAATGCGACGGAAGCTCTGAGCTAACTGAAGATTGCGGAGGAGATAGAGACGAAATGGGTGAATTAACATGTCTAAATTGTCCCTGCCCATATTCTGCTTGTTGCTTACTTCCTTCCCTCATGTTGTTATTCATGTAAGCCTGTGCCACTTGTCGGCCATTCCGACCCTGTTGCAAACTGGGGGTAGAGGAATCTGAAGTTCCTCTTGAAACCTCTGAAATGCGGCTATGCTTGTACGTGTAGCCCATACTCATGTTGGCTATGACTGATGGTCTTGAGAACAATCTCCTCAGTAAGTGAATGAGCGCAATCCGAGCACTGCACAGCTGTGTTGCAGCTGCTGTAATCTGAGTGGTTGAAAACCCTGTTGCACCTACTAAAAGTAGGTGCAAAGATGCTGTATAATCCTCTTACTAAACCCTTACTGAAGAGCTTAGCACCAAAATAGGCAAATATGTATACTAGAAACCCTGTCGTGCCTAAATTGTGAAGCTGCTTTTCCAGATAAACCGTCTTACTACACCCTGCTGCACCTGCTAAGGTAGTTAAGATGCTGTTATTGAAAGGCCTGTCTCAGCTGCGGGTATACTTCATGCAAGAGATTGTACAAGAAAAGGTATAAGCTGTACCATAAAGATATCTGTGCATGTGTGCTGGCTGTGCAAGCTTCACCTCAAATATCCATGCTTCCGGCTGCTGGGCCGTGGTTCCCCATTGTCAGTATCAAGTGCCCACTAAGATGCAAAATCCACCATTAAAGCTCTCCGTCGATTCTTCAAGTGCTCGATAAGACGAAAAATCCACCATTGAAGCTCTCTTTCACATGCTCTGGCAAGGCCGCAATGGTCACATCAAGGGAAAGCGTGCAAGTAGTGGAGTGTCACTGTTGTCTGCAAAATAGAGGGCAACCCACAGAGGAGGACTCCGAGAGACAATCCAAATGGGTAAGTGCGTTAGGAAAACGAAGCAACGCACACACACACACACACACA |
| **VASCULAR PLANT ONE ZINC FINGER PROTEIN (VOZ1):**  TTCTTAAAGGTTTCGAACTTTTCCCTTTGCGTGAGCTTGCCTGTGCGCGTCATCTTCGTGGGTTTTTCTTTCCCGGCGATTTTGGGCGATGGGGAGCCAAGGCAGGCACACCAGGCCCTCCACGCAGACCCAGTCCTTCAAGGCCAAGGCTAAGAATCGAGTTGACGATCTGCAGGGCTTGTTTTGCAGCTTGCAACAGGCCCGGAGAGAAAACAGAGGCGTTGATGCTGCCATGCTTGAAGAGCAGGTCAACCAGATGCTTAGAGAATGGAAGGCGGAGCTCCATGAAGCTTCCCCTGCTACCTCCTTAGCTGTAGCAAGTCCAACCTCATCTGAACTATCTTCTGACATGCAAAGGCTTCTTCAATTGACCGAGGAAGATGATGATGCCACCAGTAGCTTGGCAGCTTGTCTGGCTAAGCCTATGTATGAGCAACGGGGGCGCAGCCCACAGGCATTCAGCAGCAATGAAGTGGAATACAATGCCAGTTATGTGGGAGTTCAAGAGCGCAGTTTTGAGCAGGAAATGTTGGAAAGACTGCTGAGAGCAGAAACACAAGCAGAGTGTTCACCACTCTGTCATGACGATAATTTATGTTTACAAGAACAGCTGACAAGCTCTTCTTTGTGTTTGCAAGATTCTCTCTCACACAAGTTCTATTCAGATGGTGCTGGTTGTCCTCCAGATGAACCATTTTCATCAGTAATGTCTCCCCCTCCTGCCGCTTTCCTTGGCCCAAAATGTGCTTTATGGGATTGCCCCCGACCTGCAACAAGATCAGAATGGTTACTGGACTACTGTAGCACTTTTCATGCAACCTTGGCTCTCAACGAGGGTGCAGGTGGACAATCTCCTGTTGTTCGACCAGGTGGAATTGACTTGAAAGATGGACCCCTGTTCTCATCATTATTTGCAAAGAGTCAAAGCAAAGCCGTTGGTATTCCTGAGTGCGAAGGTGCAGCTACTTCAAAGTCGCCATGGAATGCTTATGAACTATTTGATACCTCCATGCTTCAGGCTGAGGTGATAAGGGAATGGCTTTTCTTTGATAAGCCTCGCAGGGCCTTTGAAAGCGGAACTAGAAAGCAACGTTCTCTGCCAGATCATAATGGCCGTGGCTGGCATGAGTCAAGAAAACAGGTCATGAAAGATTTGGGTGGGCTTAAGAGGTCGTATTACATGGATCCTCAACCGACCCCACAGTTTGAATGGCATCTGTATGAATACGAGCTCACTGACTATGATGCGTGTGCCTTGTATAGGCTGGAGTTAAAGCAAGTGAACACAAACAAGAAAGGCAGTAGGTCAAAGGCACAGAATGATCCAGTGACTGCTTTACAAAACCAAATTGGCAGACTGCCAGCTAATCTATCGGCGCAAGATGGTAAGGTCTGGACGCCTGAAATGATAACAGAGCCAAAGAATAATAAAAATAGACCAAAATCTACCCTTAATGCTGCTCGCTCAAGCGGGCAGTCGGCTGATAATGAGGTTTGCACAAGCTCTTTTGATTATGCAGTGGAAGATATGAGCAACTATCTGCTTAGTCCATAAGGTTACACAAATGTCCAGACGCTGCTCGGTACTAAAATTGCTCATTTAAGCTCTTTTGGCAACAATTGTTTTCCTTGATTGGCAATTGCGTCCTAGGATGGTGTTGTAATCCTGGTCTAAGATAAGTTGCATGATAATGTATATGTAAATATCAAGGGATGCGGGTGGGGTTGTGAGCCTGAAGTCTCTCCCCTATTTTACAAGTTTCAGAGATATATCTGTCCTTCACTAGTCGTGCTTTTTGGCTAGTCTGCTGGAATACAATTCTGTGGTTTGTATATTAAAAAAA |
| **TYPE ONE SERINE/THREONINE PROTEIN PHOSPHATASE 4 (TOPP4):**  CACAAAGGCTACAATACAAACAGTCGAAGCTGGAGACTTCATAAAGTGATTGCAACGAGCCTCTCCTCTATACAGTAACCAGGCAAGGCAAAACAAAATATTTCACTTGAGAAGATAAGACTAATCAATGTGTTTCTTGGTGAGGACAAAGCCCACCGTGCTTCATACATCGGACAAAAAGCTTGTTAGCTGGTGTTATGAAAACTTTTCATTGGCCCTACTAAAGAATGAAGGGGAAGGAACAGACTACAGTCATGATCGTTTCAATGACAGCTGCTCAATATTACTCCATACCTCGTGGAAAACAGGCCAATAGCACAATTGCTGCCTCATCTCATCTTTATTGAGGAGAATAAGAGTAAGAATAGTCCTGCAATACTTCAAGATAGAAAATGGTTCCAGATGTACTCACTCAATAGGGATGCCGTGTGCACACGTAATCCAAGGAAACGGATACTTGTAGGCATTTATTACTCGGATCAATTGAGTGCAAATGCACTCAGGGCGGTACTAAAAATGACCAAATGCATGTGTCTTGAAAATGCACAATCTACAAACACTCTCAAAATCCACAGAATGAAGAAGATACATATTTCACAGACTAGCACAATATCAGGAAAACAAATGGATTTTTCGTTATACAGCAAAATAAACGCAAATAATACCACCTCTAGATCCATTTGAGACTTTAAGACGCAATAACACTCTGATCTCCCCAGTGCTCACATAAAAAAACAGATGAAGTGTACATGATTGCTCTTATGAAGCTTCCATTGCTTAAAAGCAACCCCATGTGCCACCAGCATCAAGTCCAGGTCAAATAGCTTTCTTTGGCAGAATGTAAACTTTCCAAACTAGCTCATGTGCCAATCTGCAGCGCATCCACAGTTTCTCTTGATTTTCACGGAGAACTAAGCTTTGCCACCCCTTGCTCCACGTGGTGGTGTTCCTGGTTTTGCTGCGTTGACAGATGTATAAGAAAATTTTGGCTTCTTTTCAGCAGGTTTGAGGATCTGAAAAGAGCACATAAGTGTCTCATCAACACTCATCATTGCTCCAGCATTGTCAAATTCCCCACAATAATTAGGCGCTGAAAAGATGGTAACGAGCTGTCTGTCCGCAAAAAACTCATAGCCATCCTCTACCACCTGATGAGCTCGGCATACAAGGTCAAGATCATGCTTTTGTAAAAATTCGTTTACTTTGTCTGCACCAAATGTAAAAGAGACACCTCTATCATTTTCACCCCATCCTGATATCTCTCGCTCAGGGTCGGCCCATAGGAGATCACAAAGCAGCCCTAGATCAGGCACATCAGTTGGCCGAGGTAATGCTCGGATTTGATCCAAATTGTTCAATTCTGGTGAAAGTCCACCATGCATGCAAAGAATCTTCTCATCAATCAGAGCAGCCACAGGAAGACAATTGAAACAGTCAGTAAAGACCTTCCACAACCTGACATTGAACCTCCGCTTGCACTCATCATAAAACCCATATATGCGGTTAATGGAAGCACACTCGTGATTGCCTCTCAGCAGAAAAAAGTTTTCTGGGTACTTGATTTTATAGGCCAAAAGAAGGCAAATTGTCTCCAAGCTTTGCTTGCCCCGGTCCACATAATCTCCTAAGAAAAGATAATTTGCCTGCGGAGGAAGTCCACCATATTCAAAAAGCCTTAACAGATCTGAATACTGGCCATGAATATCACCGCAGATCTTGATTGGCGCTTCAAGTTCCAGCAGGTTAGGCTGTTGCATAAAGATGGCCTTGGATGTTACGCAGAGCTGTCGGATCTCAGCCTCTGAGAGCTGCACCTGCTTGCCAGGCCGCGAGTCCCGTACTTCCAAGAGACGGACAATGATTTCATCCAAAGCAGCTGGGTCCATCAAACCCTAGAAACAGAGCAAGGACAGAAAAAGCCCACAGAGAAAGACGACTGAAGCACCGTCCTGCACGCAGAAATTTGCGCCAAGAACTCACCCACAGGGGCAAATCCAATGTGATCAAAATGAAGCAGAAAGCCCACCTTCTCTGTGAAGAAATAAGACCTAGGAAGACAGAGCAAACCCAAGAAGGATAGATGAAGAAAAATGGACGCTTGATCTAATCACACGCAGAAGCCCCTGCTTCTGCGTAGAGAGGGCGCGGGACGGGGCAAACCACCCATCTGTTGTTGGGTAATGTCGATTTCAACGGCCGCCTCCCGACGGCACTCTCTTCATACGTCACCATCCATCCCATAATACATTTATGCCACCTATTCACATTCGCCTCACCTTTGAA |
| **HIGH LEAF TEMPERATURE 1 (HT1)**:  ATTTTATGTGAGGATGAGGAAGGTCGTTGGCTATGGCGCTCGATTTTCTCTTTCTCTCTCTCAAGAACCGGTCCCCGCGCAGCAAACAAAGCTCCGCCATGGCCGCTTCCTCTGCTACTTCCACTTGTCGCCCGTGACCCTTTTTTCCTCACCGCCCCCAGTCCATTTCTTCATCTCTTTTCTCAGCTTCTGAGACGACAAGCGTGCTTGAATGACAAAAGTCTCCGTGTTCGGTCTCCATTTGTAAAGGATGAAAGTCTTCATTCATTTTTTAAGAGATTTGCTGCTGCAATCTCTTCATTTTGCACCTCTTGGGCTACCCTGTACAGTACAGGCGGAACTGAAAGACCAAACTTGCTGCTTTAGAAGCTGGAATTCTAATTGATTACTATCAGGAAGCAGAGAGAGCAAAGGCCAAGCAGATGCCTCCTTCAAGGGAGAGCAGTGGGGACAGCACTCTTGAATCGACATGGGTGGGCCGTACGCATTTCTCAAGGTCGATTTGCTACCGCCTCAGCAGCAACGCTCTTTTAGGCCTGTCGTTACCTCGTTTTGATGATTCCAAACTCAAGGGCTTTGTCAAGCTGGTAGGAGAAGACCCAGACACGTTGGCATCGTCGGGCTTGCTCTCAAACGGAATTCTTGCGAGCTCAAATGGCTCAAAGCTAAGTGATGAAGGTATGGTGGCTTCGGTTTCTGTACAGAATTTACAGCCTCTTTACACATCAAGCTCTGTGGATATCTCACCTGAGAAGATTGTTGGAGGGCAGTTATGTGTGCATCATCGTTCTCTCTCTCTTCCATCACCGGGTAGCCGACGTCATCATGAAGGTGAAGAGAATTTGTACTCGAGTGGAGAGTATTCAGATGATGGGACTAAGTTTGATGATGGTAGCCTATCAGATGTGGCGAGGGCTGCCTCTTGGACTGAATATTTTGCTACCCCCGGTAATGAGTTTGCTGTTGAGAAAGCGGAGGACTGGATGGTAGACTTATCTGATCTCTTCTTGGGCCATAAGTTCGCATCTGGGGCTTACAGTCGCATTTACCTTGGCAAATACAAGGACTCTGACGTGGCTGTCAAAATGTTGAGAAAACCTGATAATGATCAAAAAATTTCGAAGCGCCTGGAGCGCCAGTTTAGTTGTGAAGTTAATGTCCTCTCTCGAGTCCATCATCGCAATGTCGTAAAGTTTGTTGGAGCATGCAAGAAGCCGCCAGTGTGTTGCATCATCATAGAGTATCTTGCACTTGGTTCAGTGAGAAGTTATCTGCACAATCAACAACCATTTGCGCTATCATTGAAGGTAGCAGTTGACATGGCACTTGATGTCGCACGAGGCATGGAGTATTTGCATTCCCAAGGTTTGATACATCGTGATCTCAAGTCGGAGAATCTGATTATAGCTGATGATTTGTGTGTCAAAATTACCGACTTTGGCGTTGCATGCTTTGAGTGGGAATCCTCTGTCATGACTGATGATGTGGGTACATATCGATGGATGGCTCCTGAGATGATCACCAAAAAGCACTTTTCGAAAAAATCAGATGTGTACAGTTTTGGCATTGTTTTGTGGGAGCTTCTTACTGGCAATGTTCCTTTCTCGGATTTATCACCTGTTCAGGTTGCTTTTGCTGTAGTACACAAGCATGCACGACTTCCAATTCCACTCAATTGCCCCAATCTCCTTGGCCATTTAATGCATCAATGCTGGCATTCGGATCCGGACAAGAGGCCAGACTTTACCAAAGTGGTCGGAATGCTAGAAAACATGCAGGAGTCAATTGTCTTGAATCGCGACATGAGTGTTTTTCACGGGCGCCATAAGCATACACATGGCTTGTTGCATTGCTTTGGTCGTTGTGCTTCAAATTATGTTTTATGACGGGCCAGCAGCGTGTGCTTGTCACGTTTGCATTCGCCATGTCTGAATCAAGAATTTCTCGTAGGACGATTGAAGGAAAGTTTTCAAAGAGATGAGTAGGAAATTTCTTGTAAAAGGCTCATGTAAATAACAATGAGCTTCTGAGACAGGCGATTTGGTTGGGACGAATATGCAACATGAAGTAATTGGTCTATTGTATGTAGGCCTTTTGTATGGAAATTGTTTAGGTCCTAGTGTAGCAATGAATTTCTTGGCAAGGAGCGAGCTTGCCCAATTAATTCAGTCAAGGAATCATTATTTTCGCGTACAGCAAGCTTGTTTATTCACAGATTGATGCGACAAATCGGAAAGTTTAAAGGTTGCTTTTGCAGCAAGAGCAGTGCTTTCTGCTTGTATTTCATGCTGAAGCTGAGTACTCTCTACATCTAAGTTTGTAGCGATGACATGCATGGCTATAGGTCGATGCAGTTCTACCCTCATTGGCTGGCCTTGCTTGAATAAGCTTGCGGTATTAATATTGAGAATGGGAGATGTTCTCTTCAAGTTACTAAACATGTATTCAAAAAATATGAAGGCTTCTTTATTTTGTACATGCAGCATACACCAAAAGATGAGAGAACATTTGTGAATCAATTTAGTTTTGAAAATTTAAAAAAGTGCTATCGAAGTCTAGTGCCCAAATTTTTTTTGGGTTTACATGTAAAATTATTGGCCAAAATTCT |
| **KINESIN-LIKE PROTEIN KIN-14B (KAC2)**:  CACCAATAATAATAACAACCCATTGAAAAGTTCATGTATAGCCATGATCCCAACAAGTTCTTCACATGAACACAAATCCACATCAATTTGTAAGCCCAGCATTACTATAGAGCTTTTCATTGTCTTTTCATTTACAAATAAACAAGAAGTATAATTGGGCTACAACAGATGTATAGGTTCTCCTTACAAAGAGGTCTGCCCATAGAAAATTCAATATTGATACACCAAATCAGCTACTCGTCAACCTGATGCCCGGTTGAGATTACGGAATGAGGGGAAAGAACAACACATTCTCCACCTCTGAATGATAAGGAGCTAAGATACAAAAGAAAGAAAAACCACAAAACTATAACACCATCACATACACCACAACAGATTTAGCCTGTATCTAAGTGAAAACTTTTACTCTAACACCACTTCCCGCTACGCGTCTGCTATCCAGCTGCAACCAGTCTGTTATACTGGCCTCTTGAAAGATAAAGAGGCAGTTGATAATTCTCGTGAGTGCTCTCTATCAAGCTCAGGAACAGAGCTTTTTAGAGCAGGTACGCGGATAGCCAACGTCTTGTAAAGCCGAGCATACCGTGCTCGCGTACCATCAGCAGTCCTTGCCAATGCTAACTGACTAAATGCTTCAGGTAGCCGAGTAAGCACTTGCTTGATCTCCTCCAAGGATAATCCAGCCAGTGTTGAAGGCGCAGGCACAATTGCCACCATCTCCTTCCCAGTCTTATCCTGGACTTTTGCCTGTGCTTTTACAACAAGCTCAAGAGAAGATGTGGCACCACATTTAATCACAAATGGGTTTGCGGACCCATTGTTGAACTGCAAGACACTCCATTGCATCACATCACCATCTGCTCCGATGATGTTTTGGTCCCCCCAGTCACCTGACATAGCTGACAATTCTCCTGCACCATCATCCCCAGAAGCTCTTGCCCGTGTGTGGTGAGGACCATCGCGTTGCTCAGCTATCGACTCTACAGCTCTTCTTGCCTCCAGTATGTGCTTTTGAGCACAAGGATGATCTATTGTTAAAAGAGATGGCATTCGATCTGATAATGAATGAAGGGCAGAAAGCATCATTTGCTTTCTGGCAGCGAAAATTGCCTTTACAGGAGCATCTCTCTTGATCTCTTCAGCTTGTTTAACAATGTCCTCAAGTGACATAAGGGATGCTATTCTTGCATCTTCACTTGCAGTGGATGGGTTCCTGATGGGAGACCCACCCTCTTCTTTTGTTAATAGAGCAACGTCAGACCTCATTTGCTGTAAAACCATTCTTCGTTTGTGTTCTACAGACTCCAAGGCAGAACGCAATTTCGCAATTTGGCCCAAGTCATCTGCTTCTTCTGTTGCAAGTGTGGCGGCCACATCCTTCAAGTGTTGCAACTGGGACGTATAAACCCGCTTGGTGTAATCTGATAAGAGTTGTCCCAAAGCATCAGTACTAGGGCGCTGCGGCACGCCAAGACCAGACATCCAGCCATCCATAATTGCCGTTGATAACAGCTCTAGCTGCCCAGCAGTGCCACTAACTGCATCACCTCCAGATAGAGAAAGGAAATCAAAGTTTTCAGCAAGCCAACTGCGAATTTGCCGTTGCAATTCGCCTGCAGGTGTGTGCACAAACAGTGCAGCAAGAGCCTTGTTGCCAATGGCAAAATTGCGAGCTTCTTCAGTCGTTTCCCTCAGCTTTCCACCAGTAACATGCTGCCTCCAAGTCTCCTGGTCAATCCCACGCAACTTCAGAACAATGGATGAAAACTTTGACTTTTTCTCATGCTTGATGTGGACCTTGAATCCTTGTATGTGTTCATCAATTAAATCTTTTCGCACATTGGACTCATACTGAATTGGTGACCTTGCTGGACTACTCCCTCTTGAACCTCGGCTTCTGCTAGATCCTGAACCTACCTTTTCCAGAAAACGTTCCACTGGTGGCACTTTAATAGACTGTAATTCCGGAGCTCGAGAGAGCAAAGACCTTATGTAAAGAATCCTGACCCTAGAGACCAGCATAGTATCCATCACTCTTCGGGGTTCCATCCTTCGGACAAATGCAAAAACAGCATTACGAATTTCTGCCAGCATCTCATGTTCTCTAGCAGCACCGGCTTTGATAACTGCAGCCAGGACCAGCATTAGGAGCTTGTTTGCTCCATCTGAAGCTGCTGATCCCTCTGACTGCTGGTCCGGATTGAAGTCGTTCAAAGCATTGGTCAAGTACTCGCCTGCTGGAGTTGTTTTGACTTTTTCAGAGCTTGATTTTACAAGCGCCAAGTTTCCAGCTATGGCAAGAGCACCAGATGAGGAATCCAGACTCATGGCAGTTGATGACCTTACATCTGACGTAGCAGGTGGTTTTGTGCCTGTATTCCTGTTGGGAGCATCTAATTGAAAATCCTCAACACCCCTTGGCTCCATCTTCGGGACCGCTGGTGAGTTGGTAGAGGCACTTCTATCAGTGAGCCGTTCAAACAACTTTTCATTCTCCTCATGCAAGCGCTCAATAAGCTCATCACGTTTGGACAATTCTTCTTCCAGCCTTTTGACCACCTCACTCTCCACTCGATCCTTCTGCTGCGAGTCTGTATCATCCGGCTTGCGTACTTGCCTAAGATTGGCTCTACCAAAGATATCTGCAGCAGGTTGAGAGCGAGCTTCTTGAAGCTGCTGGTTCAACTCCTGCACTTTGCCCTCAAGAAGCTGAACCTTCTTAATGTACTCTTGCTGCTGAGTTTTTTGATCTTGTTCAGACTTCCCAAGCTGGGCAATCTGAGCCTTCAGTTGCACATTTTGCTCCCTTTCAATCTTCTCCTTCTCAGCAAGCACAGCAGTCTGACTCTTATGATCAGCCTGAAGTGTAAAGGCCACCTTCCAGGCTTTTTGAACTTCATTGAATAAGAGAAGGCACTGATCGTCTGCTTCTTTCAGAGACTTCTTCAATTCTATTGTTTGCTGCTGTGTTTCGTTCAGTTCCTTTTCTTTCTCATATAACTCCTTGCGTGCTTCATTGGCCATGTCGCGCCACTTCTTTATGGTGTCACGATTGCCAAGACTTAGTTCCACATTGCGCGCCCTGGCAGCGAAATGCAGTGATGCAAGTGTTTCCTGGATATCAGTCTGGCTGGGACTAAGGTTGACAATCAGTAGAGTTTTCGCATCACCTCCTAGCGAGTCTGCAAGGGTTTGAGTAAGCTTTGAGTTTGCATAAGGTACATAATCCTTTTTAGCTGTTAAAGCTGAGATCACATCACCGAGCGCTGAGAAGGACTTATTTAAATGAAGTAACTCTGTGAGTCTATCACCAGTGGCCTCTTCTTTTGAAAGCCTCTCACTGGCAGCCATGTCTACCATTGACAGCTTGCTATATTGATTCTCACCAGAAAAACTGTTGGTGTAATGAATGTGGATTGTTAAGACCAAGTGCGCACGGTTAACAGCATCTTTCCCTCGATTCTGTGTACCAGTCTTGTATATTCTAGCAAAATCTGTTGGATTCTCTACTCTCTCAAGAGCAAGCTCTATAAATTTTCCATTATAACCCATCTGCGCAGTTCCTGATGAGCGAATGGAGTTGTATAGGAGATCTCGAACCTCGTTATTAAGTTCGAACATAGTCACTGAAAAGGAGAATTTTGAAGCGGATGTCATGTCGTTATTAGACAAGTCAAAAAGTTCTTCAAAAGCCCTAAGAAATACACCTCGATCGCTATTTGATCCTTCCATGGTATGAGTTTTCCCTGATCCACTTTGTCCATAAGCGAAGATGCATGCATTATAGCCATCCAAGGCAGACTGCACAAATGGCTGAACATCTTGGAAAAAATCTCCTTGACCCACATGCGGACCATACACTCGATCAAATTCAAATTCTTTTTTCTGTGTGGTCCCTGCATCAATCCCCAACGATGATGTGTTTATTCGTATCAAAAAATCATCTGGAAAATCGGTTATTGCTGGGCCCTCATGCTCAAATTGTGGACGCACTCGACAATATACTCGGATGTTGCCTTTCACGCCTAGAAGATCATTGAAAAGCTTTTTCTTCTCTTTCCGCAGCAAAGATAAGTGAGCTTCACCTTCTAGAACAACCTGATCTAGTTTATGAGCTTTCTCAGCCAAAACACCGAGGTAACGTGTAACCCTGACAATTTTTGCATTTGAATACTCTTGCAAATCACTTGCTTCTTGTCGTAGCTCCAGCATTTCCTCTTGTGACACCAACACCTGCTCATGGAGCTTTAAAAGCTTGCTGGCGAGGGCAGAAGGGACAGCTCGCTGGGTCATGTAACTGGGTTGTGGAGCGGCTCCAAGGATGGGTAAAGAGAGACGTCTAGACGCAGCGTTGGGACTGAGAGATGATGCTGCAACTCTATCCAAAAGCACAGCAGCATCCTCATCAACATCATCATCCTCGTCATCGCTGACTGGGTGTGCCCTGCTTGTGTCAACCGACCTGCGAGGATCGTAGCTTGGCAGTTCCCAGCCCCATGAGCTTCGAAGTGACGCATCTCCCATCTTTATACACTTGAAAGGCAATCAGATGAGGCTAACAAAACCTGCCCTGTAGGCTAAAATGAGGATAAACTCTCACTGCAATCACTTGCAGAGACCAAATGTGTGTATGCAATACCAAAACCATATCCTGCACATGTACAAGTTACCTCAAAACCATGGCTGGCAGTGTAAAAAACCTGAAGAAGAAGCCTGTAGGAATCAAACACAAAGCTTCACCGGCGTTTGGCAGTAGTGTTCGAGCTTAAAAGCTTTATATTGCAGTCCAAAAGCCCTAAAATGTAGAGGATGCAGCGAGTGTGCAAAACCCAATTGCAGAATGCAAGCTGAGAAACCCTCGCCTTTTTGTATAAGCTGCTAAGGAGTTGAATGCAGGGGATGCTGTAGTTGCACCCAACAGCTGGGAAAAGAAATACAAGGTAATCTGATGCAATAAGGGGTGTGTATGTGGGTGCGTGCGTGCGTCTGTGTGTGTGTGTGCGTGAGTGAGTTTGTTTGTGTGTGTGTATGTGAAGAATCTGCTCTCCCTGCGTCGGCAATGGTCAAGAGAAAAAAA |
| **PHOTOTROPIN-2 (PHOT2)**:  TTTTTTTAAAGCAGAACCTTTCCTTTGCATAATTGAAAAAAAAAGAAAAGACAATTTGGGTGTATCCTATCCACAGGTGGGAATAAATGAAAAAAAAAATTTAAGCTTTTAGAGTAACCCATGTTTAGTTGTGAAGGTGCATAAAGGTGGCGTGGAATGGGAACACCTTTTTCCGGCTGCGTGGATCCGCCACACCGAAGTCCCAAGTGCACCACGTCTTGCCCCGCGTGTCGTAGGCAAGTGCCGGTCGTGACATGGCCTTCTCTGTACACAAGCATATGAAGGCAGCTACAACGCCCACTTTAAGCCTGGCCACAAGCGGCGGGGTGCGGGAAGCTGTGAGACGCATGTAATCCTTGGCAGGACAGGCGGAAACATGCTCCCACCGGCCCTGCGCCTCCTCCAGCTTCCAGATCGAGATCCCCGCAAAAGGCTCAAGAAAGGAGGCCACAAACAGACATCCCTCCACCTCCACCAGCTTCCCAAAAGGCGCCCGGGGAGGGTGCGGCATATTCTCCACCTCCTTCCCGCTCTTGATGCAGAAACTGGAGTCCTCAATTTTCTCCAACCCCGGCGAGCTCCTCCACGCATGAATCACTCCCTTGCACACCACAGGCTCCCGGTTCGCCGACGGCGCCTCAACCTCCCACTCCATCCGCTTCCATCCCGACGAGCTGCTGCTGTAGATGAAGATACGGCACTTGCCGGCCAAGGTTTTGGCCAGCAACACCACCTCGTACTCCCACTCCCTCCTCCGATCCTCCACAACCTGGATGAAAGCCCTGTGCAGCACCTCGAATTCCTCAAACCGCAGCACCGGCAACGCCTTCCACATCCGCATCACCGGATTGCACACGTAGAGGTACGTCTCCCCGTAGCCTTGCGTCCGCTTGCTGAAGCACAGCAGTCCCTTGTCCGACGCCCAGAGATCCAGTGGGAAGGAGCCGCCTCCCGGCAGACACGACGGATCCATCTTCCGCGGCAACAGACACGCATGCGGCAGCTGGAGCAGCAGCTGCTGCTGCCCCACCAGCTCCGCCCCCCCGAAGCAACACAAGCAAGCTTTTGCAGTGCCTGCCGCGGCAGCAGAGTCACACTCCCTTGCGAAGGCGGGCTCTGAGAGCATCGATTGCCATCTCCTGCACACGCACATGAACCGCCGGTGGCTCAAGATCGGCACTCTCACCAGCACCATGCGCAGCACATCCTCCGGCAGCCGGCTCCACACGTCCCCGTCCATCTCCGCCTGTGCCTCGCTGCACGCCTGCTGCGCACCTTCAACCTCGTCCTCCATGAAGAGGTAAAGGCACTCCCTCCCCGCCATCGCCATGGCTGCAAGCGCGAGTCACATTGTGGAAACACAAGCGCTTACACGCGCTTCATGAATCATGAGATCGGACGGGGACAAACTTTCAAGTTTTTAAAAAAAAGTCAGACCAGAGCTCCTGGACACTGAGGCTGCACCGTGGCACATGCAAAACGATAAGGAAGCACGTGGTGGCCAATGGTCCATATTTCGTTTCCAACAAAAAAGATAAGGAAGCACGTACGAGCTCCGACATATATGACGTGACTCTCGGCCCTCCCGCTCGGTACGCATGAACAGCGCAGATTGCGCAGTGAACAGCGTCTTGGATCTCTTTAAAGAGCAGGTTGCAACTTGCAAGGCGGATTCAAGCACAAGAGGAAGAGCGCATAGGTGTTGATCAGCAATGTCCGCCAAGACGAAGCACAGCGTGCGGGTGGCGCAGACGAGTGCGGATGCCAGGCTTCATGCGGCGTTCGAGGGGTCGGGCTCGGGAGGCGGCGCCGGGGATGGCGGCTCCGGGGTGTCCGACCACTCCAAGTCGGGGCAGCCATCATCCAGCGGCCGCACCGGGGTGGCTCCGGAGGCCATCACGGCGTACTTGCAGCGAATGCAGCGCGGGGGCCTGACGCAGGCCTTTGGGTGCATGTTGGCCGTGGCGGGGAACAGCATCCTGGCTTTGAGCGAGAATGCGCCGGAGATGCTGGAGATGGGGGTAGGGCTGGGCACGGACCTGCGGATGCTGTTCACATCGGGGAGCACGGCGGCGCTGGAGCAGGCGGCCAAGGAGGAGGATCTGAACAGCGTGAACCCGGTTGTGGTGCAGAGCTGCGGCGGGTCCGGGAACCGGTTCTACGCGGTGTTGCACAGGATTGAGGATGTGGCGGGGCTGGTGATGGACTTGGAGCCGATTGAGGGCGGTCTGGGTGTTCATGTGGAAAAGAAGTCGAGTGCAGCGATGGCTGTGAAGCCTATTGCACGGATCCAGTCGTTGCCGGGAGGGGACATTGGGCGGCTGTGCCAGGCGGTGGTGGAGGAGGTGCAGGAGATGACAGGCTACGATCGGGTGATGGCCTACAAGTTTCACGAGGATGAGCATGGGGAGGTGGTGGCAGAGATGCGGCGCCCGGACCTGGAGCCTTACCTGGGCTTGCACTACCCCTCCACGGATGTGCCGCAGGCGTCCCGGATGATGTTCATGAAGAATGGGGTGCGGATGATCGGGGACTGCACTCTCCCGCCGGTGCGGGTGGTGCAGGCGAAGGAGCTGGCCCAGCCCATCAGCCTGGCGGGGTCCACTCTGCGGGCACCGCACGGATGCCACGCGCAGTACATGTGCAACATGGGCTCTGCGGCGTCGCTGACCATGGCGGTCGTGATCGACGACTTCGACGACGATAGCAGCTTGAGCGGGAGCAGGAAGCTGTGGGGACTGGTGGTGTGCCACCACACGTCTCCCAGGAAGGTGTCGTACCCCCTGAGATGCGCGTGCCAGAAGCTGATGGAGGCATTTGGGGTGCATCTCAACATGGAGCTGGAGTTTGCTGCACAGCTGAGGGAGCACCACATTCTTACGACGCAGACGCTGCTGTGTGACATGTTGAGGATGATTCGGGGCACGCCCATTGGGATTGTGTACAGGTCGCCCAGCATCATGGATTTGGTGAAGTGCGATGGCGCCGCTTTGTACTATGGGGGGAAGTTGTGGCCTCTGGGGACTACGCCCTCTGAGTTCCAGGTTCAGGACCTGGCGGAATGGCTGCTGGGTTCCTCGGAGGAGATTGCCAGCAGTGGAGTGACTTGTACCGACAGTCTGGCGGAGGCAGGGTATCCTGGTGCTACCGCGTTTGGTGATGCGGTGTGTGGCATGGCGGCTGCTAGGATCACGCCCAATTCCGATTTCCTGTTTTGGTTCAGGTCGCATACTGCAAAAGAGGTGTTCTGGGGAGGAGCTGAGCATGACCCTCAGGCCAGGGATGATGATAGCCGGCTGCTGCCCAGGTCGTCGTTCAAGGCGTTTTTGGAGATTGTGAAGAGGAGGAGTTTGCCGTGGGAGGAGGTGGAAGTGGATGCTATCCGCTCGCTTCAGCTCATTCTGAGGGAGGACCTGGAGGAGTTCTGTGCTGCTGCTGCTGCCGGAGCTGACGTGGAGGATGTGGATAGCCTGGTTCCTTTGTCCATAAAGCTGTCGTTGAAGGAGAGCGAGGAGATGGGTGGTGCGGAGGATTCGAAGAAGCTGGAGAGGGCAACCAGTGCAGCTGCAGGAGGAACAGGAGGAGGAGGGTGGGAGAAGATGTCGCTGCCTTCCAGTCTAGCGCAGGAGTGGATGGAGGCAATTCGAGGTACTGGAGATGGCGGGGCCAGTGGCGGAGTTCCCTTCGATTGGGATGCCATCAGTGTGTTCCAGCAGACCAGCTTTGTTGTTGTGGATGCTCTCAAGCCAGACTTGCCCATCATCTTTGCCAGCACAGGGTTCTTCAACCTTACCGGCTACACCTCCAGGGAGGTGATTGGAGGCAACTGCAGGTTCTTGCAAGGGCCTGACACCAATCCTGAAGACGTTGCCAGCATCCGGGATGCTGTGGTGCCACGAGGCACAGGCACCTTCTGCGGCAGGCTGCTCAATTACAGGAAAGATGGCAGCAACTTCTGGAACCTGCTCACCATAGCTCCCATCAAGGACGACACTGGCACCATTGTGAAGCTCGTCGGGGTGCAGCTAGAGGTGAGCAAGTACACGGAGGGATCCAGAGCAAACAGGCTGCGGCCCAACGGACTGCCGCAGTCCCTCATCAAGTATGACGTCCGGCACCAGGACAAGGTTTCCGCCTTGGTTGCGCAGATAGTGGCTGCTCTGACCAAGCCATACAAGGTGGAGCCTCCCAGGCCGAGCTACGCCATGCGAGCCTCGCTCACTGGGCAGACCATCCAGCCCTTATCCCCGGGACGGGCTGCTGCTGCGCGACCCTACTCTGCCTCCGATGTGCCCCAGACTGCTGCCATACCCAGGGAGGGCGGAGGTAGAAGGCGGCACCGGTCCTCCACCTTCCTGTCCTTGCTGGGGATGGAGGAGAAGGATTCGGAGGAAGATCAGTTCCCGGAGCCGGAGCTTATCATGATGGACAACGCTTCAGTTGGCCGGCCCGGAAGCTTGGACGATCGGGAGCGCACCAGGAGGGGCATCGATCTGGCCACCACGCTGGAGCGAATCGGGCATAGCTTCGTGATCACAGATCCCAGGTTACCGGACAACCCCATCATCTTCGCATCGGACCAGTTCCTGGAGCTGACAGAGTACAGCAGAGAGGAGGTGCTCGGCGAGAACTGCCGCTTCCTCCAGGGCCGGGACACGGATCTCAAAGCGGTGCAGCTCATCCGAGATGCAGTCAAGGAGGGGCGCGACATCACAGTGCAGCTGCTCAACTACACGAGGGGCGGCAGGCCGTTCTGGAACCTCTTTCACCTGCAGGCCATGAGGGACAAGAAGGGCAACCTCCAGTACTTCATCGGAGTGCAGCAGGAGACGGACACGCTGGACAGGGTGGAGCAGGAGAAAGCTGAAGTGGTGCGCGCCACTGCCCAGAATGTGGATGTGGCTGCCAGGGAGCTTCCCGACGCCAACCTCACCCCGGACCATCTGTGGGAGCGGCACTCCAAGGTGGTCACCCCCCTCCCGCACAGCAAGATCAACAGCCCCTGCTGGTACGCCATCCGGAAAGTGCAGCGGCGGCTCCGGCGAGGGGAGAGGCTGGGGCTCAAGCATTTCCGGCCCATCAAGCCGTTGGGATCGGGAGACACCGGGAGCGTGCACCTGGTGGAGCTCCGGGGAACTGGGCAGGTGTTCGCCCTCAAGGCCATGGACAAGTCCATGATGCTGCACCGCAACAAGGTGCACCGCGCCAGAGCGGAGAGGGAGATTCTAGGCATGATGGATCACCCATTCCTGCCCACCCTGTACGCCTCCTTCCAGACCAAGACCCACGTCTGCCTCGTCATGGATTTCTGCCCCCGAGGCGACCTCTTCCTGCTGCAGGACAAGCAGCCCGACAAGACGCTGAGCGAGGAAGCTGCCCGCTTCTACGCCGCCGAGGTGGTGGTGGCCCTTGAGTACCTCCACTGCATGGGTGTCATCTACCGGGATCTCAAGCCCGAGAACCTGCTGCTGCAGAAGAACGGCCACATTTTACTCACCGACTTCGACCTCTCCTTCCTCACCTCCTGCCACCCGCAGCTCATCACGAGCGGCCGCGGCAGCCGCAGGCGCATTAAAAAGAGGCGAGCACGGGTCATCTTCTGTGCAGAGCCGCATGTCTCCTCCAACTCGTTTGTGGGCACTGAGGAATACATTGCTCCTGAGATCATTTCCGGGCACCCTCACAGCAGCGCCGTGGACTGGTGGGCATTGGGAATCCTGCTCTACGAGATGCTCTACGGCCGGACCCCTTTCTGCGGCCGTAACAGGCATAAAACCTTCATCAACGTGCTGAACGACGAGCTCACCTTCCCAACCAGCATCCCTGTGAGCGTTGCGGGCAGGCAGCTGATAGCGGGCCTGCTTCAGCGGGATCCTGCCAGACGGCTGGGCGCTTTTCGGGGGGCAAGCGATGTCAAGAAGCACCCCTTCTTCCAAGGCATCGACTGGCCTCTCATCCGAGGGAAGAACCCACCAAATAATCTGCACAAGCTTAATGCCACCACTTTCCACGAGTTCTGATCAGGAGAGCTTGTTTTCTCAAAATTGTTCATTTTTCTTTTCTATATATAGTGAAAGAGCTCTTTTTGTAGAAATTTAAGAGCTTGAAAACATATTCTTAAATGTGTCTACCCTTCAATTAAGAGTTTGGATAATTTATTCATTGTATGTGAGCAAGGACACTAACCTTAGATTTATCTTATTCACTATGTGTAAAATACTAGGAGTGACAGTCCTCATTTATAAACTTGCCATTGATTCAGGCTTTGCATACTTCATTTGCTGTGCAGCATTGCCTTGAAGTTCAGTTTTCAATCTTTCAAGTTCCAGTCGAGAGACTCTTAAGCATGCAAGCACAGACTTGAGATTGTTTATTTCTTGTGTTTGAGAAAGTACCTCTTCATCCTTGCGAGCAAGCTGCTCCAATAAGACCTGATTCTCTTTCGCAACGCCATCCTTCTCCTTCTGTAGAAATGATACGTTAGCTTTAAGTTCAGAGTCCAACCTGCTTGCTTCATCTTCCATAGACTTAAGCCTCTCCCTCAGCTTTCTTATTTCCTTATTGTATCTTTCAACCTCTGCTTCAGATGAAGTTGCTCTTTCCAGCGCTCTCACCAAATCCACTTGCAAAACCTCCACGTCTGAAGAGCCCTGATGTTGTCCATTCACATTCTCTAGTGCACATAGTTGAGCTCGTAATTGTGCTGAGTCTGCCAGGGCGTGTACCAAATGCTTCTCCTTCTTCTCCATCTCCTCTTCTAGTGCTAACAAGCGGGCCTCGTCTTGTTGTGCCTCTTTCAACACGTTCTTAAGCTCTCGAGTAAATAGTTCCTTGAGAGAGGAGATGCGCCATCGCTGGAATGCAAGTGCGGCATCAGCGGCAGAAGCACTAGTGCTGAGGGTAGCCTTAAGATCAACGGCACAGTCGAGGGCAGTCACACCCGAGAAAGCAGAAGCTTCTGGTTGTGCAGAAATGTGGACAGGGTCTGGCGAAGATGATGAAAGAGACGTGGCTGGTTGGCCATAGTCATCCTCTCCATTGTTGGAGCTCTGCTCGTCGCTGTAGTTAAGCACGCTGCCCAGCCTCGTCAATTTGCCAAGCTCATCCCGCACCCTTTGAAAATTAGGGTTTGTATTACGAGGGCGCTGCACGGCAGAAAATTCTTGAGGCGTGACAAGTGCCCCCATCCCACGAGTAGGCGAAGGACTTTGAGAAGGTGCTGTCACGAACAAAGCTTTGCTGGCCCTTCTCGACTTCACCATTTCCCCAGAACAACAACGGGGGATGACAGTTGAGTGCAACTCCAAAGCTCCCATGCAACTAATTG |
| **CRYPTOCHROME 1 (CRY1):**  GTTTGCGCAGCTTCAATGAGGGTTTTTTAGGGAAGACGATGCTTCTTCTGTTGAGAAGAAATTAGGGTTTCTTCGAGCTCGCGTTGAGAAATCAGGGCTTCAGTCTATTAGGTGTCCTTCTTGCTTTAGCAGCAAAGCCACGCACCAGCTTTTCAGTGTGGTTTCCTCCTCGCCATAGCCAAAATCTTCTCCAGCCAGCTATATTTGCTCCTCATCCTCATATCCGATTCCCGCTGCCCTTCTTGCCAATCGCCCCCTCTCCTGCATCGAACGTCGAGCTTCCTCACTCCTCATTCTCCTTTTTATGCAATTGCCGAGACCCCCGCTTACATCGCGAGGTCATGCCGGGAGACCCGCGCACTGAAGTTTGAGCATTACCCTCACCCTCCTCAATGAAGTTTGAGCTCGCCCTCTTCCACACCTCCCTAAATGCGCCATCGCAGGTGTAATCGAAGCAGAGACTTTGCTGAATGCAATAGAAGCCTTAAGAGAGAGGGTGTGCAAATTGGGTTTCTTTTTTTTACTGCCGAGGGCTTGTGGAAGACCCACAAAAGTAGCACAAAGCTTGCCAATCAATTTTTACTTTGCTCATGGAAATGAGCGAAGCATTTATCAGCTTGATGTAAGGGCTGAGAGGCAGGTCTTGAATCTTGACAGTGCCAAACAGGGCTTGTTTGAAACAAAAATCTATGTAGAGCCAACTTCCCAGTATTTGTGTTGAAGTAACCAAATCGCCGATGGCAAAAGCAAAAGCGTGCACCATAGTGTGGTTCAGACGAGATCTCCGGCTAGAGGACAATCCTGCGTTGTCGGCAGCTGCAAGGGCGGGCTCTGTGGTGCCTGTTTTCATCTGGTCGCCTGAGGAAGAAAGGCAGTTCCACCCGGGACGAGTATCGCGATGGTGGCTCAAGCAGAGCCTCGTCCAGCTCGACACGGCCCTACGCAGCTTAGGTGTTTCCTTGGTTTTGATAAAGACCCATGACACCCTTTCCGTCCTCCTAGAGCTTGTCCAGACAACAGGCGCTAGCCAAGTTGTTTATAATCATCTATATGATCCCATTTCTCTTGTTCGAGATCATCAAGTTAAGCAGGGCCTCACAGAAAACGGCATTCAGGTCCAAAGTTTCAATGGTGATCTACTGTACGAGCCATGGGAAGTGCTTGATGATCATGGAAAACCTTTCACATCCTTTGAGAGCTACTGGATGAAGTGTCTTAGCATGCCCTTTGAACCTGATTCTCCCTTGCTTCCCCCAAGGAAGTTAATGGCATTCCCAGGCAACTTGTCTTCTTGTACATTGGAAGAACTTGGGCTTGAAGATGAAACAGAGAAAAGCAGCAATGCCCTTTTGGCAAGGGCTTGGGCACCAGGTTGGAGTAATGCTGACAAAGCTCTGGAAGCATTTCTTGCTGGTCCGTTACTGGATTATTCTAGAAATAGGCATATGATAGATGGGCCCACAACTTCCTTGCTCTCACCTCACTTGCACTTTGGGGAAGTCAGTGTTCGGAAAGTGTTTCATTCTGTTAGAAGATTGCAAATTTTATGGGCTAAAGATGGTTCAATGCTAGGTGAAGAAAGCATCAACTTTTTTATGAGGTCTATTGGTTTTCGGGAATATTCAAGGTATCTTAGTTTTAATTTCCCATTTACTCATGAGAGGTCTCTCCTTGCAAACTTGAAGTCGTTCCCTTGGAGGGTTGATGAGGGGTTTTTTAAAGCTTGGAGGCAAGGCCGCACTGGATATCCATTGGTGGATGCAGGAATGAGGGAATTGTGGGCTACAGGGTGGCTTCACAACAGAGTACGAGTCATAGTATCCAGCTTTTGTGTAAAATTTCTTCAACTACCTTGGAGATGGGGCATGAAATATTTCTGGGACACCTTACTAGATGCAGATTTGGAATCAGACGTGCTTGGTTGGCAGTACATATCTGGAAGCCTTCCAGATGGCCATGAGCTGGACCGAATGGATAATCCTCAGACTGAAGGATACAAGCATGACCCACTTGGTGAGTATGTTCGGCGCTGGCTACCTGAACTTGTTCGATTGCCCACAGAATGGATTCATCATCCATGGGATGCTCCTCCAGCAGTCCTTCGAGCTGCTGGTGTTGAGCTAGGGTCTAATTACCCTCGGCCCATTGTAGAAGTAGCAGCAGCCAGGGAAAGACTGCAGCAAGCAGTTGCACAAATGTGGGAGCAGGAGGCTGCTCTAAAGGCTGCTGGAGTCGTTATTGATGAGGAGGCTTTAGATGAGAATTTGGAGGTGAAGGTCGTGACTCGGCCTTTAGTTTCGACACAATCAGTCAAGGCAGCCATGGCACTCAATCCAGCAACTGAAGTTCTGCAACTTCCTTCAAGAAGCTCTCACCGGGATCAAATGGTACCTTCCTGTGCCAAGCAACTGGAAGTGAAGACTGGTCTTCCACTTGAAGGTCTCAATTCGTCAGTCTTACCTGAAATTCCAGTGTCTTCACAGCAGGAGAATTTGTTAACGTCTACTCCGACTCCTGAAACAAGAAATATATCTCAAGCCTCACCAGAGAGTTGTGGTAAGTTGATGAACTGTGCTGAGGCTCCTAGGCCAACATATACTTTGGCTCCGCCTCCAGTCTCTGACATGAACTCCACAGCAGAGTCTTCCTCTTCTCCAAAAAGGCTAAGTGCCGAAATAAGAAAGGATGCATCCATGATGTGGGTGCCTGCAATCTTGCATCAACAGCCGTCAGACTTTGGATGTGTGCCTTATGCAGGGGATGCAGGACAATTGAGAAAACATTTGCGCTCTTTGCAGAATTCAAGGCCAGATAATAAGGTGGAAGAGGGGGCCCAACTTTCTGGTGTCCAGTGGCCGCGAAGAACCAAACGGAAGGCTAGAGCCTAAATTCTGCCAATGTTTAGGAGTCTTCGCGGTATAGTCGAATTCTCCTAGTGTCTTGCAGAGTGTTTGGCTTTCAGCGTGGTTGGTATACCAAAATGTTTTCTGATGTGTACAAAGCTCTCAGAGAACAAGCCGTTAAATGCCTTGTGATCAGCAGGTGCAAGTGTTGCAGCAGAGTCATCAATGATCACACCGCCCCATTCCGAGCTTTAATGAATGATTAGTCATGATTAGTCACAGTAAGCCATGGTATGGTGTTATCCCCGTCTCTTGAAGAACGTGGCGAATAAAAGGGAATAAGCTTCCTCCCGTAGATTTCTTTGGGGTTGTGTAAAGTTGTCAATTCCATTTGCACTCTAAATTTAAGTGAAAATCTGTTTTGTTGTTTTTCCCTCGTTCCATTATCTAGGAGGTGCGTAAAACAATGAATGCCAAGGGTTTTGTGGCATTTTTGTATGAGGAGCTGCAGTTGTAGTAGCAGCACGTTGAAGTCTGAAATGTGCAGAGGCTGCATAGCAAAGCCTGGAGTTGATTACCTATCGGGTTTTTTCTGATACTAGTAGCACCTGGCTCATGACTGTTATCTACTACCTTTATTGTATTTTTCAGGAGGCTTTCAGGCCAGAAAGAATATGCAATAGATAGCCCTTGACTATGGTAAGCAATGAAGACATGGAATAAAAGGTGGTTGATAGTCTCAGAACTGAGCAAATACAGATGCTTGTATTAGCACAGTAATTGTTATCTCACTTTGCACTCAATCAGTCAGATGATGCAAGGCTGCTGTCCAGAGTATGAACAGTTGAATAAGGATGTTACCAGGTTTAGTGACTTTGCCGCTTGAGTATGAATGTACTCTTGCATTGGCTTGAAAAGAATGGCTACTTGTCTGCCCTGCTTCATTGAAGAAGTGGATTATATATAACATAATACCTCTTTAGATTGTGTGTGATGGTACTTTTTTGCGCTGTGAGAAATTTGAGATGAGAGCAACTTCAAGTCGGTTTAAAGCATAGTGAACAACAATACATATAGGACGATAATAAGATGTAATTATCAGGTTGGATACTTTGTTACTGTT |
| **CRYPTOCHROME 2 (CRY2):**  GAAGAATTTAGAAATCAAAAGGTTAGTGTTGGCTGAAAGCGTCACGTGAGTGTGTAGCACGTGGCAGAAGCTGGTTGATTGCACTATGATGTATTCACATGGTTATGGTGGGCTCACCGCCACGTGATTAACTCTTAAGTATGCGCCTCCCTAAAACCATCCTCAGCAAAGCAAAGCAAAAAATCACACAGTATATATATGCTCTCATGAAGATCAAACCCTCTTAATGGTATCTTCAGATCTGTGCATCTCGCCATGGCTGCAACCATTGTGTGGTTTCGCCGAGATCTGCGCTTGGATGATAACCCAGCACTCAAGGAAGCATCGCGCAGCGGTGGAGCCGTGCTGCCGCTTTTTATCTGGGCTCCTGAAGAGGAAGGCCAGTTTCAGCAGGGCCGCATGTCTCGATGGTGGCTTCAGCAAAGTCTCATTCAGCTCGCCCAATCCCTTGAAAGGCTTGGCACTCCCTTGATCGTCCGAAGGTCCTGCAGTTCTTTGCACGCCCTCATCGACATTATTGCACACTTCCAGGCATGCCAGGTCTTTTTCAATCAGCTCTATGGTATGTGGCGCATTGGAACTCAGCTGTGTGTGTGCATTTTGTTTAACTTTTTCAAGCTTCTCCTCTAGGGAGCGTGACGTGCTGTGCACACAGAAACCACAGCCATTTGACATGTATGTGGAACACCTTAATTCGATGAAAGTAGCTGTAATATTTCTTTTTGAACTGGTTTATTGAATGATGAATACACATTCATAACTTATTAATCATGGGACATCCGGTGATCTTGTAAGACAGCATGGGCTAGGTTACATGCCTTCACACGGAGTACATTGCTCATTTGTGCTTCGACATGATGCATTGCAGCCAATCCCATCTGGCCACGGCATTTTGCATGTCATTTCATCCAATGTTTGTCTCATGAAAGATTGACACAGACGTAATGGGCTACCAGATGGTAAAACTGCTTTGCAAACAAATCTATGTAGTGACATCGTCTTTGATGTTGAGGATTGCAAGGGGACTTAGGGTTCATGAAATTACAAACATATGTTACCCCACGGCATCCTGTACACATGGTGCGATTATCATTGTGATGCAGTCGGAATCCAATGTGCACTGTAATACATTATAGAGGTTTCATAAGTAAAACCTTCATGATCGAGTACATAATTTGAAACATCATTGCCAACAGATGCACACTGCAAAACTGCTTTTGAGCATGGTTCTCTTGGAAGACAAAATGTTTTGTAGAGAGCAACAGCGCACACTACAACTTAGTAACAACCAGTTGAAAGGGAAGATAAATAACTTTATTTTTATAATTTATAGGTCTTTTCAACAATGGTAGTACATAAAGTAAGGCTTTTACAAACGGCTTATGCTTGGTTCATTAAGGGATGTCCTCCTATGCATCAGGTTATGGCTTCTAGACGTTGCAGGTGATGTGCATTAATTCCGTTCCGGTTGATTAAAAATCCTTGTGTTTGGCATAGCTAATCATGAGTTTTGAATATGAATGTGCAGATCCCATATCATTGGTGAGGGACCACAGGGTCAAAGAGGGATTGTTGCAAATGGGTGTGGATGTGAGAACCTTCAATGCTGACCTGCTGTATGAACCATGGGAAGTGAGCGATCCGTCAGGCAAGCCATTCACCACATTCAATGCATTCTGGCAAAAGTGCCTTAACATGCATGTTGAGCCAGAGGCACCATTGCTGCCTCCTAAGCGCTTGCTCGGATACACAGGGCATGTTCCTAGCTGCACGATAGAGGAATTGGAGCTTGAAAACAGTACAGAGAAAGATAGTAATGCCCTCCTAGCAAGATCGTGGACACCAGGTTGGAGTAACGCTGAAAGGTCGATGGAGACTTTTGTGGAAAACCATCTATTACAGTATGCCATCAATCAGCACAAGGTGGATGGGTCCACCACATCGTTTTTGTCACCTCATTTACACTTTGGTGAGTTGAGTGTGAGGAAAATATTCTACCATCTCCGTGTCAAATCAGTAATGTGGGTGAAAGAAGGACATCCAGGTGGAGAGCAAAGTGTCGATTTGTTCCTAAGGTCCATTGGATTCCGAGAGTATTCAAGATACATATGTTTCAATTTTCCTTTCACACATGAGAAACTTTTACGGCAGGATAATAGAGCTTTTCCATGGCGTGTTGATGAGAGCTTATTCAAAGCATGGAGGCAAGGCAGGACAGGGTATCCCCTTGTAGATGCGGGCATGCGCCAGATATGGGCAACTGGGTGGCTACACAATCGCATTCGGGTTATCGTGTCTAGCTTTTCTGTGAAGTTCTTGCACCTACCTTGGACATGGGGCATGAAATACTTTTGGGATGCTCTTCTAGATGCCGATCTGGAGAATGACATCCTTGGATGGCAGTACATTTCAGGTGGTCTCCCAGATGGGCATGAACTCGACCGGATGGATGATCCACAGATGGAAGGCTATAAGTATGACCCACATGGGGAGTACGTGAGGAAGTGGCTGCCGGAGTTGTCAAGGCTACCCACGGAATGGATCCATCATCCTTGGGATGCTCCCCCAAGGGTCCTCCGAGCCGCAGGAGTAGAATTGGGATCCAATTATCCCCGCCCTTTAGTGGAATTCGCAGCGGCCCAAAGCCGCTTGGAGAAAGCGCTACGGGAGCCATGAATCCAGAGGTTTTTACGTGTCCCAAGTCATATTGAGGATCCTCAGAAAGAAATTTTCACACCCTTTATGAGTCGGCGTTACAAAAAGGGAGGATCCTTCAGAGGGGATGTTTGGTGTTGGTACTGTTTTGATTGATCCATCCATGGCACGGTCATGGAGTTTTCTTACATTACACTTCGTTCATCACCAAGGAAGGTACGCATCTACCTGCTGCTTGGTCTGAGGTTCACGAACGTCGAAGTCCATCAAATAAAGTGTATCGAATGGTGCTTTTATTTCTATTGGGCAGCATCAAAGACCGTGGAATTCTAACCTTTAAATGCGCCCCTCAAAGATGGCATTTTGTAATTCTGCAGGTGAGCTCTTCTTATAAACCATTGCATGTGGCTTCACGGCATCCTCCAGCATTGATGTGATGTTAACCCCTGAATGCACACAGACAAGCCAATCACAGAGATGTCCTGTAGATAGATGCAGGAACTTGTACCTACAAAGATGTGCATTCTTCGACATAAATGTACACAATTATGTGCATTTGCATTCTAACAGCACACACGCAGACTCGCAAATAATGGAGCCATGCTAACAGACTCGCAGACGCACACACATGCATTTGCATTCTAACAGATTTTTACAATTGTAATGATCAAGAAAAGTGCAGCTGGAATTTCACAAGAGTTCAAAATGACACCTTGGCATTTGGGAAAGGATAAGCAGCCTTCACAAACACGGTGTGCAGCTCGGCGTTTCAAGTCTATCAACACTGTTCGAAGTCTCATGAGTAGAAGATACTGTAGCTGTTTCATAGCAACCACAATGAAGGCTATCAAAATTATATGTATGCAGTCTACTAGTACTATAAAAGGCTTGTTCGAAGCTGTTGCCAATAATCAACTTTTATCTGCATTGTGGGTTTGCTTTTGATCTCTTCCAACTGATTGATTGTATTGGATTATTGTGAAGCCTGTTTTAAGG |
| **G-PROTEIN COUPLED RECEPTOR 1 (GCR1)**:  AGAAAAAAAAAATGTAGCTTTCAAATAAACGGCTATGCATGAAAATATAATACAGCATGTGATTGTGAGAATCTGGCTGAGCATATGTGATGTGTATATAAGGTATAATTTACATGGGCTAGCATGGGAAATGTGTGTGTGCAAAAGAGTACACAAAAAGGTTTCCACAATGTTTACATGTGACTAATGAATGTAAAAACCCCCATAGGGTTGGTAGGGCCAACAGCTCCCAATCTACATAGGACAATTTTGCAGATTGTTTCTAGTTTTGGTCATATTACACTTTGTCTTCTTGACTATCAAGCTGTGTCAACTCATTCTCTTGAATTTCTCGAAGGCGCATGAAACCAGCTCTCCTCCAATATAGTTTCTCTGGCCAATATTGCTCAGTTTTTTCTTGAAGTGTCCGGCGTACGGAGGAATTCAACCCATACGCAATGGAATTAAAAAGCCCCATCAGTGCAGAAGTTCCAACGTGCAAGCAATACAACCAAAACAATTGCTGATGAGGGGCCACAAAATCATGTATTCTATTGATTGTTCCAAATGCCCAAGATCCTATCAGAATTAAGGGATAATAACCCCATCTGTTCATAGCTTTCATGTCAGCCTTCACTTCTACTTGTCGTTGCCGATCAGACATTTCCACAGCCATTCTAGCAGCATAATTCAGCATCCGAATGACTTGAAAGTATATTACTCCATTGAACGAGATCGCTCCCCACAAGGGAACATAGAAAGTTAAGAAGCGAACAACCTTTCCAGCGTTAGTTTCATTTTGAACCCAGCACCAAGCACCTGCGTGCCCATAGTCGTTTCCTATTGAGGGAATGATTGCCAAGATCAGAGAGGTACCCCAAACATAAAGATGGAAGATTGGACCAAGTTCTTCTACATCTGTCTTGTGTTTAACCACCGTTCGATGGAGAGTAAAGGCTATTGTGGTTGTCCAAAGAAACGATGCCACGGAAAAAAATTGTGTAGTGTAGCCTTGAACATAGCACAGAAACCCCTTCCCTGGATCGCCGAGAAGATTGAAAATGCTGCAAAGCAAGTCAGAGAGGGAGAGGAAGAAAACGAGCTGGAAAGAGAACTTGCGAAGCTCTTTGAAGAGAAGGTAGCAGAGAACGATGAAGCCTGATCCGGCAAAGGAGAAAGCCGACGCAAACACGTTAATGCTAGTCAAGGTTTGTGTCTGCTCTGCACTTAAGCCTGTGCTCATGTTGCCTCCCTCCCTCTCTCTGTCACAATACGCTGCACACCTCCATCGCCTACCTTCTTTGCCATCCACAGTTGAGTTTTTGTCCGAGAGAATCTTTGGAAATGCTTTTCGAATCTTCCTCAAATAACGAGACCCACAAATCAAG |
| **ADAGIO 1 (ADO1)**:  AGAGAGAGAGAGAGAGAGGTCTGAGGATATATTATGCAAAAAAAATATACATATATATCTGTTTTTCCCTCATTTTTGTTGTGTGTGTGTATGTGGGTTTCCCTGCTTCTTCCGTCCTCTCTATTAGTGTGCTCTCTCTCTAGACTTTGAGTATGTGTGTATGTATCCCTTCTCTCTATCTTCCCTCTCTCTGTGTGAGTGTTGTATCTTCTTCTCTCTAGTTTCTTGAGAGTGTGAGAGTGTGTGTGTGTGTAATTGGTGCGTGTCGCGAATCATCGCGCTGGCCATCGCCATGGCCAACCTCTGCTTCATCTTGCGCGAGAAGGGCTGAGCTCCAGTTTGTAAGCTTCTCTTCGCTCCTGCTAGCTTGCTTAAGAATCTGGCTTGTTTACAATGGGCGATTGGAAGAATATTGATGAGGATGCAGATATGGTTGACATTGATTCATGTCTCATCGATGAGGAGGACGATGATTTCACAAATGATGATGTGTACCATCACCCTCAGTATGATAGTCATGGGGTTATGCATGGTGATGATGACCCATGCTATCCCCCTCCATACCATCAGTATGACGCTCGGGTGCCTGCGGAGGATGATGACGACGACACCCATCTGAGCCCAAAGCTAGAAGCTCTTGTGGGTGTGTACAATGCATCCCTTCACTGCGACCAGGATGGTGCCCGTATGGGCGTGTCTGATGATGATGCACACAACTTCCATTGCTACCACCATGACGATGCCCCGGTAAGCGAGCATGATGAGGAGGTGGGCATCTTTCCATATCCGAAGCCAACTGAGATGCTGTTTCGGACCAGCCCTTGCGGCTTGGTGGTGACAGATGCGCTTGATCCTGATCAGCCTGTAATCTATGTCAATGCTGTCTTTGAGATGGTCACAGGCTACAAGGCTGAGGAGGTCCTTGGTAGAAACTGCCGATTTTTACAGTATAGAGGGCCCTTCGCAAAGAGGAGACATCCATTGGTAGACACAACTGTTGTAAGAAAGATGCAAAAGTGTCTTGAGAACGGGCTAGAGTTTCGAGGAGAGCTTCTCAATTTCAGGAAAGATGGGACTCCGTTGATGAACAGATTGTGTTTAACTCCAATCCATAGCGATGATGGAACCATTTCTCACATTATTGGGATACAAGTGTTCATGGAAGCAAATATTGATCTAGGACCTGTAGCATGTAGTTTGTGGAAAGAGTCCCTTCACACAGCTGAATGGTACACTGAAGAATATCTACCTCACAGAGAGAAAGTTACTGCTTCCGACCAGCCTTCTCGCCAGCATCGTTGTGGACTTTTGGACCTGAGTGATGAGGTTTTAGCTCACAAAATTTTGGCACTATTATCACCGAGGGATGTTGCTTCGCTTGGTTCTGTTTGCACTCGGTTGTTTCAGCTTACTAAGAATGAAGACTTGTGGAAGATTGTATGTCAAAATGCATGGGGTGTGGAAACTACGGCAATCCTTGAAGCTGTGCCAGGAACGAGGAGGCTGGGTTGGGGGAGACTAGCAAGAGAGCTAACCTCTCTCGAAGGAGCAGCTTGGAGGAAGATTGTTGTAGGAGGGGCTGTAGAACCTTCGCGGTGCAATTTCAGTGCGTGTGCCGTTGGAAATCGACTGGTTCTCTTTGGTGGTGAGGGCATCAACATGCAGCCTATGAACGACACCTTTGTACTTGATTTGGGTGCGGCAGCACCAGAATGGCGACACATGCAGGTTAGCTCGCCTCCTCCTGGTAGGTGGGGGCACACTCTTAGTTGTCTGAATGGTTCATGGCTCGTAGTTTTTGGAGGATGTGGGAGAGAAGGGCTGCTCAATGATGTGTTTGTTTTGGATTTGGATGCACAGCAGCCTAAATGGCGGGAAGTAGCAGGGGGAGCTCCTCCTCTTCCCAGATCATGGCACAGCTCTTGCACACTTGACGGGTCAAAACTAGTAGTATCCGGGGGGTGTGCAGACTCCGGTGTGCTATTAAGTGACACTTTTCTGTTGGACTTAACAATGGACAAGCCCATGTGGAAAGAAATACCAGTGTCATGGAGTCCACCTTCCCGCCTTGGCCACTCACTGTCCGTATATGAAGGCCGAAAGATTCTCATGTTTGGAGGCTTTGCGAAAAGTGGGTCCTTGAAGCTAAGATCAAGTGATGTTTACTCGATTGATTTGGGTGAAGAAGAGCCTAATTGGAAGCATTTGAGCAGCAATCCTGGGGGTTCTGTACCTCCTCCAAGGCTTGATCATGTTGCGGTTAGTCTGCCTGGTGGGCGGGTGCTGATTTTTGGTGGCTCTGTGGCAGGGTTACATTCAGCTTCACAACTTTATCTGCTAGATGCAACAGAGGAGAAACCTACTTGGAGGAGACTTGATGTGCCTGGGCAAAAGCCAAAATTTGCTTGGGGACATAGCACGTGTGTTGTGGGGGGAACTAGAGCTGTTGTGCTAGGGGGTGAAACAGGCGAAGAGTGGATTCTGAATGAACTTCATGAGCTCTCACTCGCAACAATGTAGGGCTCAAGTGTTGTGCTCCCAATCTGCACCAGTCATGTCTAACCACATAGATGAAAGACTTTTTGGAAGAGGTCTGAGAAGGACAGCCAGATTTGTGATAGGAAAGTAAGATGTGTTATTACAGTGCGCACATCGAAGGCATTGATGGAGGCTAGCTTATCCAGCTTCTGTTCTTACCTGCCTAAATTTTCTTGTGTGGGGAAAGTGGCAGGTCTGGTCGTGGTCTTTCCAGGGAGGCTTATTTTCTGGTGTAAATAATTTGTTAGTGTACCATGTTGTGTCTTTCCAAATTCAAAGTTGCCGAAGGATTTGGGTCTTGTAATAGGCTGACTTAACTGAGTAGGTTAGGTGATTGGTTTGAATTTTTTCTACTAGACAATGTAAGTAATTTTTGAGTGGTATCATGTAATGTAGCATTCGATAGCCGTGTTGTTGCATAAGGACGCCCAAGTTTTGGGAGCAGCGTCTTTTGATGTATGAATAATTAACTGGAGCTCTGCACCAATCTCACTGTCCTCAACACCAACCAGCAGTATAGGTATTTTTTCTAATTATGTTGTATGGAATGTGTACTTATTCGCAATTGTAATAATCATTATCTTGAATTTGGAAAAAGCTGATTTTTTTGGT |
| **GIGANTEA (FB)**:  CCCTCTCTCTCTCTCTCTCTCTATTTCAAGCTCTGCTGCTAGCACTTAACCCTAGCTGATTCTATGTTCAAGGCTCCTCTTGTACGCTCTCAATTTCTGCATAGAAATTTCACAGAGATCTTCTGTTTTTCAACCTCCAAAAGCTAGCTCGGTTCTGGAGCGGATTGCATCAAGCAGAGAGCAATAGCTTCATGTCTCCTCCTCGCCAGAAATGGATTCGGCGGTTGGAGTCATCGTCGCTTGTCAGGCCACCTCCACTAAACCTGGACCAAAGACAGACGGAGGTACTAGCTTATGTTGAACTCTTTGCACAATTCGCATCTGAAGCTTTCGGTCATGATATCAGCGAGCTGGTGCGGAGTCATTATCCTCATGGTGAGGCATCTCTATTGGATGATGTACTTGCCATGTTTATCCTGCATCATCCTGAACATGGCCATGCTATTCTACATGCTTTGCTATCTTGCATCCTTGATGGAACCATTGTTTACGACAAGAAAGCACCACCTTTTGGGTCTTTCATATCTTTATTCAGCCCATCCAGTGAGAAGGATATTTCTGAACAATGGGCTCTCGCCTGTGGAGAAATTTTAAGAGTTTTGACACATTATAACCGTCCAATCTCAAAGGCTGAGGGTTGTCAAAATGTTGGAAGACCTACAGATGCTTCTGGTTGTGAAGCAAGTTCAAGCAATGGACCTCAAAATCATCAAGATCTTGAGAGAAAAACTCTCACAAGGTTACTGACTCCTTGGATAACTGATAATCTACTTGCTGCTCCCTTGGGTGTCAAGAGTGATTATTTTCGCTGGTGTGGAGGAGTGATGGGAAAGTATGCAGCTGGAGGGGAGCTGAAGCCACCGATAACAGTTGGGAGCAAAGGACCTGGGAAACATCCACAGCTGATGCCATCAACTCCTCGATGGGCTGTTGCAAATGGTGCTGCTGTAATACTTAGTGTATGTGATGATGAAGTGTTACGCTATGAAACAGCAGATCTCACAGCAGCAGCGGTCCCAGCATTATTGTTGCCTCCTCCAGCCACAGCTCTGGATGACCATTTAGTGGCTGGCCTCCCTCCGCTTGAGCCATTTGCTCGACTGTTTCATAGATACTATGCCATTGCCACACCTGGTGCAACTCAGCGATTATTTCTAGGTCTCCTTGAGGCTCCACCGTCATGGGCGCCCGACGCTCTTGATGCATCTGTGCAACTTGTTGAACTGCTTCGAGCAGCTGAAGACTACAACTCAACAATGCAGCTTCCTAGAAATTGGTTGCATTTACATTTTCTGAGACCGGTTGGAGCAGCTATGGCCATGCGGTCAGGAATTGCAGCAGATGCAGCAGCAGCCTTACTGTTTCGAGTGTTTTCACAGCCAGCTTTGCTTTTCCCGCCACCTGGGCATGCACAGGATCATCAAGGAAGGCAGTCGGTTTCTGGATTCTCAAGGCATCCAGAGACAAGTGTAAGGGAACAGATGGTTATTGCTGCTGCAAAAGCCACTGAAGAGGCAACTGCAAGAGGCATAGCATCATTGATGTGTGATCATGGACCAGATGTAGAGTGGCAAATATGTACACTCTGGGAGGCAGCTTATGGACTTCTTCCACTGAACTCCTCTTCTGCTAATCTGCCGGAGCTTGTTGTTGCAACACCATTGCAGCCTCCTTCCTTGTCTTGGAATCTCTTCCGCCCTCTACTTCGAGTGCTTGAGTACTTACCGCATGGGAGTCCCTCGGAGGCTTGCTTGCTTAGAATATTCACTGCCACAGTTGAGGTGATTTTGCACAGGGCTATTCCCAGGAAAGAGAATCAAGATCAAAGAACTGGAATTTTCAGAGCTTCTCAATTTGGGATTGGTAGGTTTGGTTTGAAGCAAGTGGCCAGCACAGAGCTGCGAGCCATGGTGCATTCTTTGTTCACCGAGGCTTGTCCATCTGCAGATCTTGCGGCAAGATTGCTTTCAGTTGCTTTCACAGTTTGCTTGAGCCATGATGCAGTGCAACAGGGCAGTAGAAAGACAGAAAAGTCCCTCGTAAGCGAAGAATTAAGTGAGGAGGGAAGGGTTAGGTTGAGCACTGGGAAACAGAGGGGAGCAGTCTCAACTTTTGATTCGTATGTTGTAGCTGCAGTGTGTGCCTTGGCATGTGAAGTACAGCTACTTTCTCTAGCACCTATGTTAGGTGCATCAAAGCAAGGTTCATTCCAATCAGCAGGACCTGGAGTAGGTGGCTCAGGGAGTTTAAATAGTTTACAGGTTGGCGTGGTCTCTGCAGTGAACAATGCAAGGAGACTCCTTCGGCTTTTAGAAGCTCTACTGTCCTTGATACCACAATCATCATATGTGATTCCAATTAGTGGAAGCAGCTCCTCTGGTGAAATTGTTGCTGCTGCTGTGGTAGCTGCTCATATATCAGAGGTTCTAGGGAAGTCGAAGGCTTGTATGCATGCTTTGGGAGCCATTATGCGCTGCTCCTGGGAGCCTAAACTGTCTGGAAAGGCTGCCTCGGTGCTAGCTCTTGTTGAAGCCAATAGAAAAGTTGTGGCTGCAGTTGTTAATTCATCTGGAAGCAGTCTTTCAAATGAAGTTGTCAATGAAGAAGATGTGAAGGATTGTCCAGCTGAAAGTAAAGCAGTCATTAAAGGAAGAGCACAGGGACATTGCTTGGATCCCAAGAATGTCTTTCAAAAACTGGAGTCATGTCATGGCTGTGACACAGCAATAGATGATCTTAATGGCAGCTCTAAGAGGAATTTTGTAAGCGTTATCTGGAAGACCTGTTCAGAAAAGAGCTCTGCAGGCCTTCCCATGAATGCATCAGACGTTGTTTCGCTTTTGTGTATGGACAAGGACAATGCCTCAAATGACAACATTGGCTCTTTTGTAACAACTGTGCTACAAGAGAATAAGGATTTGTCAATAGCAGCTGTGCCATTGCTTTGCAAAAGGTTGATAACTGCACCCGAGGTCCCCACTTATGGGGAGGGCACATCTGCCAAGAAAGGATGGCGACAGGTTGTGGAAGCTCTTTGTAATATAGTCTCAGTGTATCCTGAGAAAGCAGCGGCAGCAATCATGTTTCAGGTAGAAAAGGATCTTCAACCGTGGGTATGTAATAATGATGCACCAGACTTTGTGGATGTTTGGCGAGCGAACAAGCGCATTGTATACCTTCTAAGTGAGATTCTACGGCTACATCACGCACCTGAAGCTCTGAAAATTGTCGCCAAGCGTTCTTATACCCTTGAACGGGCAACAGAAGGACTGGCAGTGGATGGTGAAGCGTGTACTATGCCACAGCTTGAGTTGCTGGAGGCTGCAGCAGTTGCTACTCAACTCTTGGTCATAAATAACAGCCCTACTGTAGAATCACTATCGATTCTTTTAAAGATGCGTCTTCCTGCAATTGTACATTGCTTGTCCCACAATAGTGCTCATGTCAGGGCATTGAGTATAGCACTTTTGCAGAATGAGGTGTACTCTAACTCAGCAAGCCTACACTTAGAGAAAGGCAAGATACCATCAGAGGAATGGAAGCTGTTAGTTGGGCAGTGTGTTGCACAAGAGATGCATTCTCTGCAGGCAATGGGAATGCCCATTTCGACACTGGTAGAGGCGGCGACTTCCTTGGGTTGCTGTGTACTCGCTTGATGCAACCTTATTTGTGTAAAGTGTTTGTTTGGAAAGTGTCCTCAAGTTTTAGTTCTGAGGGGAGCTCTAGCTTCTGAGGCATTGCCATGCTCAGGTAGTCATTGGAACTAACGCAGCCGTGCTGAAGCTATGTTCATTGACCACTTGTGTTTTGTATCTATGTGTTGTAAAGGCCCCCTTGGTTATGGGGCTGTAAAGGAACAACCCACAATTCCTCAAAGGTTGTATGGGGATTCAAACAAAGCTAACTCAGTAGAAGTGGAAAAGATGACATCCTGATACATCTTAGCTTAATGGGTTCCATAGGTGCAGAGCTTTTTCATCTTTTCTAATGATGCACCAAAGCGTGTATCGCATTTGATTGTTTCGGTTAAGGTAATTGCATGATTGATGGCGGAGACTGCACACTGTTGTATAGCTGGTCCCTCCTTCCTCGAAGGGTGAGATGCAGGGGCAGCATATTCAGCCTTGTGGATAGCATTTTTTGTTAAAGTAGTGAAGAGGGTTCATGAGCATGTGGAATTTTAACATGTTCTGCACTTCTTCTCCTGTATGATTGGATTAGTTTGTATGATTGGATTAGTTGCTCTTATTTTAAAAATTGTCCTTCTCTACTGCTGGGAAATTTGTTCTTGTTGAGAGTTCCTAGCAATGTGATCCAAGC |
| **SUPPRESSOR OF PHYA-105 1 (SPA1)**:  AATGGAGAGAGTTCCGAAAATCCCAATAAGACAGAGATCTGTGGAGTGTGGATACTAGCAGTCTCTCTCCGTACCACTACCTTACCTCCTCTTTCACACTGGCTATGGCGGCAACAAACGCTTGAAAACAACCCACATAGCAGAAAGAGAGTTTGTGCCTCTTGGAGATCGACCCACGTCTCGAATAAGAACCTACATGCAGTAATTGCAGGTAACAGATTTGCTACAACCTCCTACAAGCTGTAATTCTCCTCTCAGAGCCTCATCTTCACTTCAACGAAATCAACCGCAGCTTGCCATACCTTGGTACATTTGATCTCTTTGCAGAGCTCCACCTTTGCAGTGGCTATGGCTTGAAAACTTTCTTGTTGAGTTCCACCTGCACTGGCAAGAAAGTGCCTCAGGGTTTAGGGTTGCGAAGCAGAGCACAAGCAACTCACATTTTTAAGAATTGTCTTTCTCAATGCCATCACACCGTCCCGGTTGATTTGACTCTCTTTTCAGACAACTAATGTTGCAGAAACGTTTGTCTCTCACAGAGCTATGTTGTCAACCCGCTAGCTTTGCAACTCTTGAGACTACATTTTGCGATTGCCGGTCGTTACTTAGGATGTGCTAAACTGGAATTAGCTTGGCAGTCTTTCATGGTTTTGTAAGTAATTGTTGCTAGAGCTTTGGATGGACTGGATTCTTGAAGTCCTGCCAGTGTACTTTAGCTCTCATTGACAGAAGCAAGCAATACATCTGCTCTCAGGCAAGTAGTAGTGTTGATATTCTCCGAAGGCATGCACACGCTTACCAGGTGTCTTTAATGGACAAGCATGCTGTTCGGAGTCCAAATATTGATTGCAATGTCAAGATAACTGCTTCAAATGAATGTAGTGTAGCAGAGCCAAGCTGCACCAAACTCGTTGCTGATGATGCACAGGTACTGGAACAACCAGAAAATAAAGTAGTGGAAAGTTCATGCTCTCGGGGACTGCTTGAAGGCATGGTTATACATTACATTCAATCCGATCAACCGTCCAATTTGCGATTGAAAGCGCAGTCTGTTAACTGCAATCTTTTGTCTTGCAAAAGAGATCTTTCTGAAAGGATCCCTGATTCAAAAGCCTCCATCAAGCAAGCTGAGAGCTACAAGCAAGAATTTCGTGAACATCAAATCCAGCAATGGGTTTCTAAGCACAGCTACACACAGGAAACTCTCCCAAAAGATCATTGGCTTGGTGTGTATCCCCAACCAGGAGAAGGGGTCAAGAGGGCAGAAACTCCGGCCTCAGTTCAGCATGCCGGAAGCCGTCAAGGTCTGGACACGGGTGCACTAATAAGGCAGCCACAGGCTTTCATAAAAAGCTCTTCTAATGTGGATTATAGAGATTCTAGTAAGAAGCATGTCCATTTTTTTTCCAGCAATGCTCTCATTGCCGACTCAGCCACCGACTCAGCCGGTATGGATGCATCTGAAGGTTTTTTTTTTAGGAAACGAAAGTTTACAGATTTAAAAACGGGGATTCATCAGGACTTTCCAAATGAGGCAGTTGCAGCAGATCGTCAGCTCAACAGAGCAGCAGGTTTAGAACAAGCGTATTTTGAGGATGACAATAAGGCAACTGAGATCACTTTGCGCCAATGGCTTAGCAGGCCAGGTCGCACTGTTGATTGTCTTGAATCTTTAAATATATTTAAACAGATTCTCCAGTTTGTGGATCTTGCTCACATGCAAGGCGTCGTGCTTAAAAATGTTCGCCCATCTTTGTTTCTTCTTTCTTCATTGCACAGGGTGACTTTTTTAGATTCTGCAAGCTCCAGCTCTAGTTCTGGCTCATCTGAACCTTCTACAGGTGCAGCGTCTGTTCAAGCTTCTCTTCTGGCAGATACAGCATCCATGAGGGTTGACACTGCTTCCCAGACTGCAGAAAGATATTTCTTGATGATGCATACACCTCAAAGTAGGGATCTGGGGGAGCATATCCAGCCAACGGGTTTGAGAAGTACAAACGAGCATACACTTATTTCTCCAACTCAAACTAAGATTTCTGCTGACAGGATACACTTTGGCTCTGATTCTGAAGCTCGGGATTCAGGTACTGGTTGCTCTGATTGAATCTGTGCATTTTGGTGAAGAAAGCTAAGGCGTTTTTTGTTTGTAGGGAAAGCACAAATGCAAGATAATCCTAGGGACCCTGGGGAGGGTCCTTCCAATAGTAAGTCTCACCAGAAGGACATTTTCCCGGTGCGACCTACTCGGATCATGGAGGACATGTGGTATACAAGCCCTGAAGAAGTTCAAGATGGGACATACTCCTTTGCATCAGACCTTTACAGTTTAGGTGTTTTGTTCTTTGAGCTGTTCTGCCCTTTTAGCTCCTGGGAGGAACATTCAAAGATAATGGTGGATCTGCGCCATAGGATATTGCCACCCAGCCTTCTTTCTGATCAGCCCAAAGAAGCTGCTTTTTGTCTCTGGCTGCTTCATCCAGAGCCAAATTCTCGGCCCAAAACCAGAGATGTGCTACAATCAGAGATTCTTAGTGATGCTGGTGAGGCGCTTGCAGAGAGACAAGATGCTATGAATCTAGAAGAAAAAGAAGCAGAAGCAGAGCTGCTGTTGGAATTTCTTCTACGTATGCAGGAACAGAAAAGGACCATGGCATGCAAGTTGGAAGATGAGATTTCATGTCTAACTTCAGATATAATGGAAGTGAAGAGAAGACGGTCTTGTTCGCAGCGCTCCTGCACAATTCATGAAGAGCAAGATCCTTCTAGCAGGATAACACAAGAAGGAGCTTCAGGAAGAGTTCAATGGAGCTCAAAGAATTTAACATCAAGTGGCGTAGTGTTGCAGGCCGATGACACAGAACTCTTGAGTCAGGGCCTAGGTAATGAAGTTGCTGTTGATTCTGCAGAAAAGCAGAGCTCCTGGGGCTTTGATACAAAGCTTGATACAAAGCGAAAAGAGGAACAAATACGCTCAAAATCTGCTCGATTGTTGAGTAATTTTGATAAGTTTGAGGAAGCTTATTTTGCCATGCGCTGGAATGTTCAGCCTGAAGTTTTAGTAAGCCAAGCAACCCAAGAAGCCAGCAGTGGCAGTGCACCAACAGATTCTAGAAATGCTTTTGTGGAGGTGAATAAAACTTCTGAGACTGGCACTGGTGGAAAGGATTCTCTTGGATTTTTCTTTGATAGCCTTTGCAAGTACGCAAGGTATAGCAGGTTCGAGGTAAAAGCCACACTTCTTCATGGCAATTTGCTGAACACTTCCAACATGGTCTGCTCACTAAGTTTTGATCGTGATCAAGAGTACTTCGCGACTGCTGGTATATGCAGGCGAATCAGGGTGTTTGATTGTGATGCTGTATTAAATGAGAATGTAGATATACACTATCCGGTTGTTGAGATGATGGGAAATTCAAAGCTTAGTAGCATTTGCTGGAATAGCTATATCAAAAGCCACATTGCATCCAGTGATTACGATGGCGTAGTTCAGCTTTGGGATGCTAGCACTGCCCAGTCATTGATGCAATACAAGGAACACAAGAAACGTGCGTGGTCAGTTGACTTTTCTCAAGCTGATCCTACAAAGTTGGCTAGTGGCAGTGATGATGGATGTGTAAAGCTTTGGAGCATCAATCAGGAGGGAAGCATTGGAACAATCAAGACAGAGGCAAATGTGTGCTGTGTCCAATTTCCTGGAGATTCTGCACATTTGATAGCTTTTGGCTCTGCTGATTATAAAGTGTACTGCTATGACTTGCGCAGTACGAGGCTTCCATGGTGTGTCCTGATGAATCATAGCAAAGCTGTCAGTTACGTGAAGTTTCTGGATTCTGATACAATTGTGTCTGCATCTACGGATAATACCTTGAAGCTCTGGGATATATCGAGACCAAACGCAACTGGAGGTGTTTGTAAAACGCCATCACTGACTTATACTGGTCATACAAATGAAAAGAACTTCGTTGGACTCTCTGTAATGGATGGCTACATTGCGTGTGGTTCGGAAACCAATTCGGTCTTTGCCTATCACAAGTCTTTACCTATGCCAGTCGCAACCCATAAGTTTGGCTGGCTGGATCCACTTACCGGCAAGAACATGGGAGATGATACTGGAAAGTTTGTTTCAAGTGTATGCTGGAGAGCCAAGTCGCAGATTCTCGTAGCAGCAAACTCATTGGGAAATGTCAAGGTGTTGGAGATGGTATAGGAGAGTGGACATAGTAAAATACCACAAATTTGATGATTGCATACGGTGCATTGCTTTGCAGAGCTTTTTCTGTGCATCAGATTTCTATTGCATGCCACGGGCGCAAAGTACTTTATGTACTTTGTCTACTTTCATAGAGAAGAGTCATAAAGTTTTTGAAGAGTGATACATGGAAGCATGTAGTTGTTGAAAGATGATTCAGGGAAATTTACCCTAGGGTTTTTGAAGAAAACACCAGGATTTAGAGTTCCCCCACAGAGTGGTCGTGTACAAATAATTGAAGTGATCACACAGGCCGGTTTAGTTTGTAAATAAAGAGATCTGTAGAAGACACAAACTTTACTCAGAAGCGGAGTTTTTGTTTACCTATTTGTGACAAGGTGAAGCAGACGGAAGATGACTGCTTTTTGCTCTCTCAACTGAGAGGCTGAAGTTGGATCGGTATCCGTGTTTTTTTGGTTATCAGCACAGGCTGCCATCACAAGTGGTGCCTCAGTTTCACAGGAAATGCAAGAAATAGAGTTTTATAGGACATTTATTAGGACCAGCAGGAAATGGAGAAAGCGAGTTCTGTTGAGTCAGTTTTCGCCTCAAGTGAGCATGACATCTTTTGGCACTTTGGGAAGAGCCAGGGGCCATGTATGTAGGTCTGTAATGACGATGTTTATTGGCAATCATGGAAATTTATATAAGCAGGTCATGGCTAGCATGAAAAATGCAAAATTTCATGTTATTGGTGTGGCTTGCGGGTGCCCTATTCATGGCATTGTAAGAGTGCAATTTATCTTTTCATGTTATTTGTTTCAACAAAAATATTTATCTGAGGGACAGGAGCACCAACATATGTAGGAGGTTCCTTTTTCGTGCATTGCAG |
| **UV RESISTANCE 2 (UVR2)**:  TTTTAAGTTTATCCCTTCTTTAAAGTGTAAGCAGGAAAAGAGAGCTCATTTTCTTCTGAGCGCGGGAGGAGAGATGGCGCCAGCAGGTAAGCGCACGGGGAGCGACGGGGAGAGAGCAGCAGCAACAGGACCCGCCGCCAAGAAGCTCAAGGCAGCAAAGGAGAAAGAAGAAAAAGTAAAGAAAGAAGCAGGGGCTTACTTCTTACAACAAGACGAGGTACTAGCAAGTGCAGAGGTCAATGCAGGCAGGGTGCGCTTGCTAAAGAAGGCAACCCAAGAAGCAGGTCAAGGTGCCCCCGTTGTTTATTGGATGTCGCGTGACCAACGGTCCCGCGACAACTGGGCACTTCTCTATGCTGCTCAGCAGGCTGAAAAGCAGGGCTCTCCCCTCTGTGTTGCTTTCAATCTTGTTGATTCCTTCCTTCAAGCCCAGGCTCGCCACTTCGGGTTCATGCTCAGAGGCCTTCGCGTAGTCCATCACAACCTCTCCTCCCTTGGCATCCCTTTCTTCCTCCTGCAGGGAAAAGCAGAGGAAAACATTCCTGCATTTCTTGAAAGATGCGGTGCATCAATTCTCGTCATGGATTTTTCTCCCTTAAGAATTGGCAAATTATGGAGAGAAGGTGTTTGTAGAAGAGTCCCGTCTTCAGTTTCTGTGTTTGAGGTGGATGCCCATAATGTAGTTCCCACATGGGTTGCTTCTGACAAGCTAGAGTATAGTGCTCGGACAATTCGTGGTAAAATTCAGAAACAGTTAGCAGCGTATCTGGTCGAGTATCCATCACTCGTGGTCCCAAGTAAAACATGGACACTTGAAAAGCCCGAGGCCATTGATTGGGATTTTCTTGTTGCAGATGTCATTAAGAAAGGTGCAGAAGTGGGTGAGATCAAGTGGTGTGAACCAGGAGAAGATGCTGCATTGGAGGTGCTTTTAGGAAAGAAGAGTGGGTTCTTGACAACACGATTAAGAAACTATGCGGACGATCGCAATGATCCCTCAAAGCCTTCTGGACTCTCAGGTCTCTCCCCTTATTTGCACTACGGTCAAATATCAGCTCAGCGCTGTGCTTTGGAGGGCCGCAAGTTGAGAAGATCACATACAAAGGCTATAGATACTTTTTTGGAGGAGCTAGTCATAAGACGAGAGTTGGCAGATAATTTTTGTTTTTACCAGCCACATTATGACAGCCTTCAAGGTGCTTATGAGTGGGCTCGTAATACCCTTTTGGCTCATGCTTCTGATAAGAGGGAGCATATTTACACGCAAGAGGAGTTGGAGAAGGGGAAAACTCACGATGAACTATGGAATGCTTCACAATTTGAAATGGTATATCTGGGGAAAATGCACGGCTTTATGAGGATGTACTGGGCAAAGAAGATCCTTGAATGGACAACTGGGCCAGAAGAAGCCCTTGCAGTGGCGATTTATCTGAATGATAAGTATGAACTTGATGGAAGGGATCCAAATGGTTATGTTGGTTGCATGTGGTCCATCTGCGGCATACACGATCAGGGATGGCAGGAGCGTCCAGTATTTGGGAAGATTCGGTACATGAACTACAATGGGTGTAAGAGAAAGTTCAATGTGGATGGATACATTCAATATGTGAAGCGCGCGGTTGCTGAGTTGAAGAAGGCAGCAAAAGATCCTGCTAAGATTCCTCCATCATCAACACCATCAAAGAAGAATGTGCTGTAGATTATGCATTAGTACTTAATTTGATGAAGACTAGAGGAGAAATTTGCTCATTATATGTATAAGATCTATTGCAGGGACTGTTGTACTTAAGATTGTAAGTGAGCCAGTAGTCTCAAGGGTTTGTAATGCACATTCATTACGGTTCGATGTCATCAAGACATTTGATACTCGACCAAATTTGTAAATGCACTTTTGACCAATTATTAAGGAGTTAATCTTAGTCAAAAAAAAA |
| **UV RESISTANCE 3 (UVR3)**:  AAATGCCTACGTGGACAGCATTTAAACTACGCTCCCGCTCTGCAGGCGGCTGTGGCACTTGGTTGATTGCCAGCCATGGAGATCAACTCTCTCATGTGGTTTCGCAAGGGTTTGCGTTTGCACGATAATCCTGCTCTGCACAAAGCCTGCGAAAACGCCAAGCACGTGTACCCAGTCTTTGTTCTAGACCCTTGGTTCCTAGCCCCCGACCCTTCAGCTCCATCGCCCGGATCCACTCGTGTTGGCGTTAACCGCATTCGTTTCCTTCTTCAGAGCTTGAGCGACCTTGATGCTCGTCTTCAAGACAGAGGATCTCGCCTCCTCTTCTTTAAAGGAGATCCCGTTTCCATCATTCCTGATCTCCTCAAAAAGTGGAATATCAAGAGGCTTTGCTTTGAGTTTGATACAGAGCCTTATGCACAGACGAGGGATAAAAGTGTCAAGGAAGGTGCGACAGCAGCTGCAGTAGATGTCTTTTGCCCCATCAGTAACACAATCTTCAACCCTGAAGAAACTATCAAAAAGAATGGTGGGTCACCACCTTTAACCTATCAATCCTTTTGCAAAATCGTTGGCAAAGCATCAGCTCCCATCGGAGATGGCCCCTCTCTCATACCCCTGGCCAAAGATTTCAATGGGGCCAAGATAATCTCTCTTCCATCCCTTCAAGATCTTGGCTATGATGACTTGGAGCAGGAAGAGTTTACGCCTTTTCCTGGAGGAGAGACCGAAGCTTTGAAACGACTAGATGCATCATTACTGGACAAGAAATGGGTGGCTGAGTTTGAGAAGCCCAAGGGGGATCCAACAGCTTTCATCAAGCCAGCCACCACGGTCCTCTCACCCTATTTGAAGTTTGGATGTTTGTCAGCACGCCTTTTCTATGCGAGGTTGAAAGAGGTTTATTCTCAATCCAAATCTTATTCAAAGCCCCCGGTGTCTTTGGAAGGCCAGTTATTGTGGCGAGAATTCTTTTACACTGCTGGATTTGGCACTACCAAGTTTGATTGCATGGTCGGCAACCCTATTTGCAAACAGATTCCTTGGAAAGACGATGATCACCTTTTGGCTCTGTGGCGCGAAGGTAGAACAGGGTTCCCTTGGATTGATGCTGCCATGTTACAGCTGAGGAAGTGGGGTTGGATGCATCACCTTGCTCGCCATGCAGTTGCTTGTTTCCTCACTAGAGGGGATTTGGTGTGTTTCAATTGCTGTCGCTATAAATCTTCATAAGTTGCCATAAAATCCTGATAAAAAAAAGGGCAGATTGATTTACATCTAGCAGCATTTATGCATGGACACTGGACAGAAGTTTCGCAAGCTGATTCTTGTAGTCTTCTCAGTTTGTATACTGGGAGAAAGGTCGTGATGTGTTTGACAGATTACTTATAGATGCTGACTGGGCCATTAATAATGGGAATTGGATGTGGCTTTCGGCGTCGTCTTTCTTCTATCAGTATCATCGCATTTATTCGCCCATAACATTTGGAAAAAAGTATGATCCTGATGGGAAATACATTCGACATTTCCTCCCTGTATTAAAAGACATGCCCAAAGAGTACATTTATGAGCCTTGGACTGCTCCAGCAGAGGTCCAAAGAAAGGCAGGCTGTGTAATTGGCAAAGATTATCCCAAACCTGTGGTGGATCATAGCATTGCAAACAAGCAGTGTCGAGACATGATGGGCGCTGCATATGCCTTGAACAAGGGGACTGAGGGGCAACCAACCCAAGGACAAGTAGCTTCCTTGCAGGAAAAGCTGCAAGTGGAAGTGTTAAGCAAAAATGTAACTGTTGCAAGCCCAAGCAAAAGAAAGAGCCGAAAGGGAAGTAACACGATCGACAGAAGTGGCAAGCGGCAAAGAAGGATAACAGAGTACAAATGAGAACTTGGACTTGCATTGTCTTTGTAGACTCGCAATTTCCTTGTCCTACATCATGCCTCAATACAGGGCATTGATTACCCATACTCCTGACAGTAAGGGCATACACACAGATTGTGAGTGCATTTGCTATTCATGGGAGCTTGCAGAAGTGGAATATTGCTGAAGGTGAGAAAAGTTTTTGTAACCAAACAAAATTTGTAGTAACAGGTAGGTCAGTATCTGTACATTTGTACTGCTTTGCAATATAAGATAGTTGAGGGATTGTAAAGGGACTGTCAATTGTTTGCATGGGTCAGTTGCTCTTGTGGATCATCTCTTTCTACAGATGGTCAGCTACCCAATTTGTCCAGTCTTTGAAAAAGACAGCTAAGACATCTTGTGAGGCCAAAAGATTCCTCAAAACTCTTGTTGGTCCTTGTAACACATGTTATCGACAATATCACTATA |
| **MUTS HOMOLOG 6 (MSH6)**:  GCCAAGCTTGCAGCACGAGAGAAATGGCGCCTACCAACAGCAAGCTCGCCAAAACTCCTCAGCAGCAGCGCTCCATCTCTTCCTTTTTCACCCCAGAACCCGCCTCCGCCAAGCGTAAGAAGCCCCTCCTCCTCGTTTCTTCCTCTTCTGAGAAACCACGCCTCTCTCACCCAGAACAAGCTCGCCATAGCCACGAATCCCCTGCTTCTCCTGCATCAAAAACACCCCTTTCAGACCCCCTTTCTCGCACGCAGAGCTCAAAACAAGCTCGCCATAGCCAGGAATTATCTGCCTCTCCCGCCGAAGAGCTCATCAATGCACAGCTTTCCAACCCTCATTCTGTCATTGGTAAACGACTTAGAGTCTATTGGCCCATCGATGATACCTGGTATGAGGGTTCTGTGAAGGAATACATCTCTCCGAATCATCTGATCGAGTATGACGATGGCGATGAAGAAGCTCTATGCCTGGAGAATGAAAAGGTCGAATGGGTTTCTTGTGAGAAACCTGCGCACAGAAGAAAGCTGAGAAAGCTCAGCTTTTTGAAAGAATCCTCAAATGTTCAGGCAGAGGATTGTCTGCAGGGAAATAGCTCGAAGCGGACTCGAGGAAATGATGCAGGTATTTGCAATGTGGAAGAAAATGGAACCAACAAAAATAACAGTGAGGAAGATATGGATAATGACGATGATGATGACGATGATGATTATGATGCCAAATCTGCTAGGAATGCTGAAGACGAGTCTGATGAGTTGGATTTCAATGAGGATGAAGGTGCAAAGGCCAAAAAAACAAAAAAGACTGTGAAACATCAAGGCAGAAAGAGCACATCGAGGTGTACCTCTGCAAAGGCAAATGCACAAAATCAATCGACGCCTGGGTGCAAAGGGTCAAAGAATGTTCTTGATGAATCTACTGTCACGGAAGCAACACATAGTGTACATGAGCAACCAAATGGATCCATTGGAAATATTCATGTTCATCTCTCTGGAGAAGCAGCAGAGAGATTTGGGCTTAGAGCTGCTGAAAAGTTCAAGTTCCTTGATAAGGATCGCAAAGATGCATCTGGTAATCGGCCTGGTGACCCAGTTTACAATCCTCGCACACTTTTTTTGCCAGCAGAATTTACAAAAGGACTATCAGCAGGCCAGCGGCAATGGTGGGAATTCAAGTCAAAGCACATGGACAAAGTTATTCTTTTTAAGATGGGGAAGTTCTATGAGATGTTTGAGATGGATGCCCATGTTGGAGCTCAATGTCTCGACTTACAATATATGAAGGGTCATCAACCACACTGTGGGTTTCCAGAGAAGAATTTTGAAGAAAATGCAGGCAAATTGGCAAAAAGGGGCTATCGTGTTCTAGTTGTGGAGCAGGTTGAGACTCCTGGGCAGTTGGAGGAGCGCAACATGAAGTCAGGCACAAAAGATAAGGTTGTCAAGCGTGAAATATGTGGAATTATTAGCAAAGGAATTATAACAGAAGGAGATATGCTTACATGTTCTCCAGATGCGGCATACCTCATGGCAACATTTGAGATATCTAATGAGGAGAGCTTGAATGGTTCTTCTATCATAGGATTGTGCTTTTTAGATGCTGCAACTAGCCGCTTTCTTGTGGGCCAATGTTCAGATGACTTGGCAAGGTCACGGCTAAGGTCTATCCTCTCGGAACTGAGGCCAGTTGAGCTTGTCAAGCCAGCTGGTTTGCTTACCTTGGCAACAGAGAAGGTCTTGAAAGAGGAGACAAGAAATCCTTTGGTCATAAGTTTGACCCCTGGGTTGGAGTTCTGGGATGCAGAGAAAACAATGAATGAAATTGTGACGTTTTTTGTTGAGAAATCAGGAAACAACGGTGGAAATGTTGATGAAAAGCCAGACTGGGAAGACGGACTGCAAACTTTGCCAGAGTTCTTGCAGAAGCTTGCTCAAACCGGTGCTAAGGCAAAAGCTGCAATTAGCGCTTTAGGAGGCTGCGTCTCCTATTTGAGACAATCTTTGTTAGACCGCCAGTTGTTAGGCTCTGGCAGATTTGAACTACTTCCGGGTTCGGATTCCTTTCTGGAGCCACCATTCAAACATAGTTCAACCTTTGACAGTGAAAAAAAGGAGGAAAATACTTTGTTGCCTAACATCTTTGCAGAAGACCCAGAGCCTTGTATGAAACTTGATAGCTCCGCTTTAGAAAACCTTGATATTTTGGAGAGTAGCCATGATGGAAGCACCCGAGGGACACTTTTAGCGCAGTTAGATCATTGTGTGACAGCCTTTGGACGTCGATTGCTGAGGCAGTGGATTGTTCGACCTTTAATATGTGTTGATTCAATTGTAGACCGGCAAAATGCCATTGAGGACATTAAGGGTGTAGCGGCTGATGCAGCATCCAAGTTTAGAAAAGATCTTTCGAAACTCCCTGATATGGAACGATTGGTTGTCCGGCTGAAGTCTTACAATGAAAAAACAGGAAGAAATGCTCATGCAGTTGTGCTGTACGAGGATGCGGCCAGAAAATTGTTAAGAGAGTTTCTAGGTGCTTTGCGTGGATTTCAGATAGTCAATGAAGTCTTGTCATCGTTCTCTAGGGTCTCAAGCAAGTTTCGGTCAAGGAGGTTACAGTCATTGTTTACATTGGGAGAGGGTGTGCAAGATCTGGCTTACGCTCTCAAGTACTTTGAAGATGCATTTGATTGGCTTGATGCAGAAAAAAGTGGCCGCATTATACCACATGAAGGCGTGGATGCAGAGTTCGATTTAAGGTCTGAAAATGTTGCAACAGTTGAAGCGAAACTAGAAGCATACTTGAAAGAGCAAAAGGAGTACTTCAAAAATCAATGTATTGCATTTGTGACGGTAGGCAAAGATCGTTTTCAGCTAGAGATTCCTGACTCTTTGCAGAAGAAGGTGCCACCTGAATACAATGTGGAATCACAGAAGAAGGGTTTTTGGCGTTATTCAACTCCAGTTGTGAAACAGCTACTCGCAGACATTGTTCTAGAAGAACAACAAAAAGAGGCAGCACTGAAAAATATTTTGCAAGGTTTACTTGCTCGATTCGGCGAAAAGTACTCTTTATGGTTGTTTTTAGTGCGATTAATTGCAGAATTGGATGCATTGATAAGCCTTATGTTGGCCAGCAACACTATTGTGGGAGCTATGTGCAAGCCTGTAATAAGCAACATCAACAACTCTTTAGATAACTCAGTACCATTTCTACTTGCCAAGGGATTGAGACATCCTATTTTAGAGCACAGCCTTGATGGGGGGAGGTGTTTTGTACCAAATGATATCAACCTTGGGGGTAAACAACATGCGCCTTTCATGCTTCTTACTGGCCCAAACATGGGAGGAAAGTCTACACTTCTTCGTCAGGTCTGCTTGGCAATCATTCTAGCTCAGGTAGGTGCTTATGTCCCAGCAGAGGACTTCCATTTTTCCCCTATTGATCGTGTTTTTGTCCGGATGGGTGCAAAAGATCACATCATGGCTGCTCAAAGCACATTTCTGGTAGAGCTTTTGGAGACTTCTTCTATGCTGACTTCTGCGACGCGACACTCATTAGTAGCATTAGATGAATTGGGAAGAGGCACTGCAACATCAGATGGCCAAGCCATAGCGCACGCTGTTCTTGAACATCTTGCGCACAAGGTGGGCTGTCTAGGGATGTTCTCGACTCACTACCACCGCCTTGCAAATGATCACAATAACGATACAACGGTCGCATTGTATCATATGGCGTGTAAAGTTGAAGATGACAATGCTATTGAGAAAGTCACTTTCCTATATAAGCTTGCAAGTGGTGCATGCCCAAAAAGCTATGGTGTGAATGTAGCACGCATTGCAGGTATGCCTGAGTCAGTTCTGAGAAGAGCAGCAGTTCGATCTGCAGAGATGGAGGGGATAGAAAGTACACTAGCCATGAAAGGTTATGAAGAGAAGCTCTTTGTGGAGGTACTGCAGGTCGCAACAAAGGCAGATTGTGCAGATTTGGGTGTCATGACCAACTTACGTGACCGATGGAGATCGTTGCATGCAACTCAGATTCCTCTTTTCCAGAAATGCTGATTTCTGAGTGGCTTTTCTGTCTTCCCCAGCCTCTTAAACCACACATTTTGGATATGGAGTCCTTCAAACATCTGGAAGTTTTCTCAGGCCTGGAAACCATGGCAGCCTAACTGGGTCAATCACAGTCTAGATAAGAGATAGTCCTCAGGGTGCCCTACAAATCATGATGCGAATTCGAGAACTCATATCGTCACCATTGCCAGCTCTCATCACTTCATTAATGGCAGGGATTATTTGGCCTCGGTAAGCCCTACAGCATGTCTGCTTTTATGATCGCCATGCCAGCAGGCCCGTTTCACCCTTATTGCCTTTTCTAAGGCATTTCTCTGCCCATTCTAAAGGGTACCGTGAAAGTAGATATAAGTTATCCGGCTCTAACGGCCTGGCAGCCTGCTAGTTTGTCCAGTTGATTTTGAGACATGGACTAGCTTATCTAACGAGTCCCAACCATTTTTTGATGGCAGTTTGGGCTGGTCCTTAGTGTTAAATATTTTGTGCAGTAAACAGGTCTTATACTTGCAGCGAAAACGTACTTTCATATGGATGAAAGCAGATGTGTTTTACTTTTCTTGCTACTCTTGAGTACACCTTTTTGTATAACCTCACTTTATGTGGCCTTTTGGGGCTCCTTGATTCTGGACATGTGAGCAAGGTTGGATTTTGGTATGCATGTAAATTTTCTTCATTAACCTTTACAGGACAACCACACTTGTAACAGTTTTTAAAACTGGCGAGTTCCGATCACAAGCAATGTCAGAAAAAAATCGACTTTTAGTGGC |
| **HISTONE ACETYLTRANSFERASE OF THE MYST FAMILY 1 (HAM1)**:  TTTTTTTAAACAAAGACACGGAGAGTTATTCATGTTCTATTATCATGTGTTAAATGTATATACAGGCTTTATAACCATTTGAGATTGAACTGTGGCTCCCTCACCACCTTTATCTACCTTTTCTGGCCGAGTGTGTTACAAGTGCAGAAATCCTATGTCGACATCAAGTTTATGACGGACATATCAACATCGAGTTTATGACGAACCAATTCCAAGTTAAGATTACAAAATTAGGCTAGCATGGAGATATTTACTAACACGTACAAATTCTTTTAATTACACGTAAGTATTTCCTCTCCCACGTCAATTATGTCAAAAATGCCCTTCAATCTCAATATATATCTACAAGCACTATAACCTAAAGCTTTTCTACATACATTCATTGCTCTTTGAATGGTGTCCAAATCAATTTCGTGGCATCCACCTCAAGTCCCCCTTTGCCAGCAGCCTTCAAATGACGCTCCAAGAGCTTAGGATCTGCACATATGACATGTTGCCCTTTTCTATATTGAATCAGTTCAAGAGACTGCAGGGTGCTGATGACATCCTCTGTCTTGATAGCAGTCATATCACTTAGCTCCTTAATAGAGAGGTTTCCCCTATGCTTTTTTATAATATCCAAGAGAACACGAGTCCAATAGCCCCTATAACTAAGCAGCCCCAAGTCCGATAAAGGCCTTTCCGGTGTTCCCACTTTGAGCTCCTTCTTTGACAATTCATATGAAAAAGAAATCAAGAACTTCCCATAGCCCTTTCTCTGATAAGGTGGTAGCGTCAGGATACATGCAAGATTATAGCCTTCTTCAGATTGTTTTTCCTTGGAAAAATATCCAACCATGTGGCAACCGCGATCATCACATTCACACAAAATGTAAAATAAGAAAAAATCCACGTCATAATACAGTGTTTTGTGATCCAAAAAGAGCTTGGCCAGGTAGCACAGATTCTGGCCATAAATTTTGTTCTTCCTTCCATCAACCTCAAACATGGATAAAGAGCCACTACGATAGATTTCATCTCCAGGGGGGTGCTTGTAAGTGCACTTCCTCATGTGCCTTGCGAGCTGCTCCTTGCGTTTCAAAAAATTAAGGCAGAACTCACAAAAGAACAGCTTGTCACAGTTACTGTACTCTGGTGGGAATGGAGAGAAATACCAAGTATCAATCTCGTACTTTCCCAGCTCTATTTTGCTTATATTCTTGACTTTAGTAAATTCCTCATGCTCCCGCAAACTTGCAGCATCAAAATCTTCGTGCCCCTCTTCAACATGGGTTTCATCGATCTTCCGTTTCTGATGCCGAGTCATTTTCAGACTACCAGCCTTGTCATCAGCCTTCTCTTCCCCCTCCTGTTCAAGAGATTCCAACTCCAATTGATCAAGTTTCACCCACTCGTCGAGCCTCCTATTAAATTCTGTGTAATGGACATAGTATTGGTAGTCATCAGGTCCAGTGGGGAGCTTGCGCCTTTCGATAACACGAACAGGGTGATACTTGTCATCGCGCCAACGGCAGAGAACCCTAGCCCCGACTTCGAGAGGGAGGCCCATGAACTTGCGGCGTTTGAGGTGGGAGTCCAACGCAAGCTCGGCCATGGAGGGAGGCTCCAAATCCATGATGCCATTCTTTCTGATCTCCTCGCCGTTACCGAGAAAATGTATGTGCTTCTCCATGCCCAGGCTTCCATTGCTGCGCGAGAAGACCTCCACGCTTCCCATTGTCTGAGGAAACCCTAACTTCGCTTGCTCTGTGTGTCCCGAGTTGCTATAGTAAAAATATTGACAATAGAGAG |
| **HOMOLOG OF REVERSIONLESS 1 (REV1):**  GATACAATTGTGATGCACAAAGTGCGAAGTAAACAAACACTAAAATACATGTGTTCGTTAAGATAGCATTATTCCTAGGCAACTAAGGTACTATCTTAATTCAAGGATCACAATGGCCATATCCCTTGACACTAATGAACTTTCCCTTTTTGTTGTATTATTACAGACAATTTCAGACCAATTTACATTAGTGTACTTGTACAAATTTGTATACAAAAACAGTTTATTGCACTAATAGCTCCTTTACAAGCCCCCTTGCTGTGCTTGTTCGGATATTAGTGCATGAATATTTAAGCTCTAATATACAAGGTCCCTCCATAGACCTCTCCAGTTGCTGCCTGGATAAACGGAAGAATAGATTCATAAATTCTTTCCCAAAACTGGTCTTCACCTGCTAGACGTTTTACAACCCGAACAATCATGAAGACCTCTTCCAGGTTATATGACAGTTTTGTTGTAAGGTACTGTTTAAGCAATTCCAAGCAGCATCTGAATGCTATCGAATCTGCCAGATCTTCATGTAGGTCCTCATGCACAATGAGCTTGAAGGAAAACATTGCATGAAGCAGAACAGACGAAAAATTTTCAGGACACCTTAAATCCAAGAAAGCTGTACAGAGAAGGCGAAGTATCTCCGCCCTGCCTCCATGCAATCTCTTAAATAGGAAGACCCATTTGGGAGGCGCACCACACCAAAGGCCATCAAGTTGGAGAGAGCTAGCTGACAGCTCCGACATCTCTTCCAGATGTCTTTCAGGCATTGTCAACATTCCCGTATCATGTTTATGTCTTTGATTGTCAGGTCGATGTACAGGGAGAGATCTCAAAATTTCCTCCCTTAATTGTGAGGGCAGCTCCTCCAAAGTGGCCATATCAACCTGTGATAAAGACAATGGCACAGATGATTCTGGATCAGCTCGTGTCCCTCCTGCAGAGGAAGGCTCGGCTCTTTCTTCCATGCGGCTGCGTTCCATTCTGGAGATTGGTAAGACATCATCAAAGGCTGCAGAGCACTTATCCCTCTCTCTTTGAAAGTTACTAGCATCACCTCCATCAGCAGCAGATACAAGAGGCTCATGTACTGGAGTAGATGACCTGCTCATCACAGATGGCATACCAATTCTGGCTTCAGGCTGCTGGGACAGTGATAAATGTTGAGCAACTGCACCATTGTAGGCTTCATCCAGTTCTGCTAAAATATCTGGAGGCAAGGATACCAGGATGGAATGGTCCAACTCGGAAAATTGAGGTAAATTATGCAAAGAACTGAGATTTTGGTTCTCTTTTTCCTTTGGTTGCTTAGGTCCAGAAAAAGGGCCTTTCCGAACTTTTCCTAAGCTTAGCATCCCCTTATTTTCCTTTGGTTGGCTTCTGTCTATCCCCCAAGGGGCGACTACGTGTCCATCCTCCTTCGTAAGATGGGGTGGCTTCTCTCTCACAGTAAATGATTTCTCATTTGATACATCAGACAAGCTATCTGCTTTGGACATGCCTTTACCAGGACTCTCTTTGGACACAAACTGCAAACATGACTCCAGTGCTTTCTGGTGATGCTGACCTTCATCACTAGAAACAGTTAGGTTTGATTCCAATTTGGTGACTTGAAGGCCCATTCCTCGGATCTCTCGTACATCAAGGTGGAAAGAGGCAAAAATTTGTCTGCTGACTCGAAGAAGAACATCAACACTATTGGTAGCACAGCCCAACGTGACTGATTTGCTTAGGTTGTCACAACTTCCGCACCCCATAAATTTGTGAGGTTCTCCAGCACCTTCCTTCCTCTTTTTTATCTTGAGTGTAAATGTCCGGCCAGTAACAAGAGCGTTTTGCAAGCGCGTTGAGACCTCTTCACATAAATTGTTTAAAAAATGTTGTGCATCAGAAGCTGAGTCAAAGCGAACACCCCAATTGACTTCAGCACCTATTGACTTGCGTTCTTGATAGTTTTGAACTTGGCGATGGTCGATTCCACGAGCATAGCACCACAGCATATCACCAGTTTTGAGACCAAAACCCCTTTGCAAACCTTCCTTGGAAACACCTCGAAGTTGCATACAATTGTAAATGGATTTGCTATGTAATTTTTCTTGCAGTGACCACCCAACCCCAGGCAAATCCTCAACTGACAAGCCTGAAAGAAACTCTTCAACATGTTCAGAATCAATTTTATACAAGCCGTCCGGTTTAGCCTTGCGGGTTGCCATTCGTGCTAGCAACAAATTTCCAGCTATGCCAACACTTGCAGTACATCTTGTCGAAATGACAATTTCCTTCCGGATATTTGAAGCCAAAACTTCAGGATCTTCAGAACCTGTGACATCCAAATATGCTTCATCACAACTAATTGCTTGCACTTTTTTGCAATACTTGTGAAGAACGTCATAAAACTGATCTGCCACCTGCCCATATCCTTCAAAATCATAAGGAACAACCTCCAGTTCAGGGCATAGAGCTTTTGCATCCCGGATAAACATGCCAGACTTGACACCAAATGCTCGGGCAGCATAATTGGATGATGAAATCTCGGCTGTGCCCTGCGTATTCTCGGAATGGCACACAGCAACAGGCTTTCCAACCAAATCAGGTCTATTCCTCACTACTACAGAAACAAAAAAGCAATCCATGTCAACATGCATGACTATCCGATCCCCATTATCGGAAGAAACAGAAAAAGGATTTGGCTTCTCATGCTGTTGATCTTTCTCTAGCTTGCTACCATGAAAACGATTCTGATAACGTGTTCTCCAAGTGCCGATGAAGTGAAGTCTTGAATTCTTGAAGTAGTTTTGTACAAAGTTAGCATCACCCAGAGTGCAATGCGATCGGACACTTTCTGAAAAGCTCCCAAAATTTCTTTCTTCCGATGCACTTGGACCTAAGTCAAGCCCACGGTCTTTCTCTGAATGTAAGTCTGACTCAAGGTCTCGTTTCAATGGATATTGGCATGACATATGCGTGTGGCCCTTTTCAAGAACTTCATAATTATCAGCTGTGGTCACTTGCTTCTCAAGTGGCATTTGTTCTTGTAAATATGTGATAGGTTGTGGCAATGGTAGAATGCCTGCATGAGACAAGTGCTTGTTTATATCCTCTTTTGTGCAATCCAAAAAAGCTGACAGAGTTTGCTGATTGGGATGATTGCGTGCAATCCGCTCGTGAGAATATAATGAAATAGGTAGAACTTTCCCACAAGATATAGAATCCACAACCCAAGAAGGCTTCACGATTGGCAAGCCTCTACTAAAAGACCTACAAGCACAGATGAATCGATTGAGCTGGTGACTCTAAACAATAAACAAATAAAGAAAACAACCTATGATCTCTTATTTTGCTGTCTGGAAGCGTGCTGCAAATGATGTGGGTGACCATATCCCGAGAAAAATAATTCTCAAACATTCCCCCATATTTAATCATGAGGTTGCGCAGTTCCTGATGAGATGGTGTAGTGAAGCCATCCACAAAAATGGAAATGCCAACAAAAAGCTCTGTTAGATCTCTACATGGAGCTGCTGCATCAAGAACACGGATGTTGGTAAGAAGCTCTCCATTGCCGGATGATGAACTGAGATCTGTGGGTGCCAAAGTACTTGAGTCCTTGTTAGATGCCTCATCTTGGAATTGTAAGCTTAGCTTTCTTTTCTTTTCAGTCATGTATTTTCCAAAGTCACCAAAGGCGCTGTCGTGTTGAATTTTGTATTGTTTAAGAGAAGGAGAGTTGGAGCCCCACAGCATGCCTGTTTGTTTCTGCAACTGCCCATCCATCTGCTTCCTCTTCATGCTGCTACTTTCAACAAGTTCTTTGTTGGGCACAGCCATCCGGCCTTTCAGATTGGTAGGAAGCACTAAACCCTTAAATCTCAGATTTTGCTACGCCTCACACAGAATTCTGTACGTACAATCTCATACAATAG |
| **WD REPEAT-CONTAINING PROTEIN CSA-1 (CSA1):**  CTCTCTCTCTCTCTCGCTCTCTGTCTTCTGGATGGCTCAGGAAAAATAAGGAAAGAGGGGGCGCAGGAGGATGTGGCAAATGGTTGGCAAGAGAGAGATTGGTGGTGTTGCGCCTCATCGTTTTTCCGCTCTCTTGCAAAGGAAACGTCTCCATAGCATTGAACTCGCCAGCCACAAAGAAGTTGTCAGTGCGCACAAGAGTGGAGTCAACAGCCTTCAGATTGATGCCACGGATGCAAGATATTTACTTTCTGGAGCATCGGACGGTTCAGTGGCTGTCTACGATATTGAACAAGCAACAGCTTTTGAACATAATACACTAATTTGGAAGCATGAAGCCCTCTTTCTGGTCGACAAAACAGTGCAGCATGGCCACTTGTATTCTGTTTCGTGCGTGCATTGGTATCCCATTGACACTGGCATCTTTGTCACAGGGTCTTTTGATCACTTTGTGAATGTTTGGGATACAAACACAACACAGGTTGAGCTGCAATTTAATATGTCAAAGAAAGTCTATGCTATTTCCATGTCAAACCTTGCAACAACACATATGCTGATTGCTACTGGAACGGAGGATACTCGAGTCAGATTATGTGATGTAACATCAGGCGCATTTACACACACACTTACAGGCCACAGAGACAGTGTATGGGCTGTGCAGTGGTCGGCCAAAAATGAATGGGTGCTTGTAACTGGTGGTTGTGATGGGGCCATTCGCTTCTGGGATATTCGAAGGGCAGGATGCTACCAAGTTTTGGATCAACATTGCTCACAGATTGGACGGCGTCCTCCTGTATTAAAGAGTGGTACAGGAAATCATAGAAGAGAAAACAATTCGATTGCTAGTTCTTCTAGCAAATCAACTTCAACGAACGAGAGAGGTCAAAAGCGGCATCTTGGTACTTCAGCAATGGACTCTAGAACTGCACATTACGGATCGGTAACAGGACTTCAAATGACCTTTGATGGACTCTATTTGATTAGTGCAGGTCTTTGCTTTTAGGTACAGACTCAAGGCTTAGATTGTGGGATTTAGAGTCTAGCTGCAACACACTTTTAAACTACCCGTCAACACGAATTCGTGGAAATAAAGGCACACAGATGACTCTTTCACCAGACTCCTCGCTTCTTTACACACCCTCTGCAAATGCCATTCTGGTCTACGATGTTTGGTCAGGCCAATCTTACTCTTCTTTGCGGGGCCATTATGACCTAGTGAACTGCTGCACTTTTCACCCACAAGGACAGGAACTCTACAGTGGGAGTAATGACCGGAAAATTTTGGTTTGGGCCCCACCCTGTCCCGCTGATGCCGAAAAGCTGGGAAGGGAAGCTCAAGAGCAAACTGTACAGGCGGACGAAGATGCATGGAGTGACTAAGAGGGAACAGTGCAAGGTGCATCGATACCCTCGCAGCATATTGAGACCTCGGCCCTGCATGTTGGCTGGATGATTGATTTCCAAATTCAATGCTCCTGGCAAAGATCATTCAAGTCAATCTTGTTTACACTCCATTTACAAGAGTTTAAAAGTTTTCTACCTTCAAAGCCAAGATAGATTCAAGGGCCCAGATTAGCTGACAGCAAATGGAAGGCATGTATACATTTGCCGCCGTCACAAAGAGAAAGTTGGCATAGCTTACAAGTGTGCACCAAGTGGTTATTTTGCATCCTTCCAGACAAAGATGGTTTGATGAATTCTGCAATAGGGTGGAGAGCAGTCCATTGTAGCTTATTCACAAGAGTATAATAGTTGTAGTCTTTCTTGACATGTTATCAATTGCTTGATTCTTTTTAAGTTTGATAAATTCTTCAATAGGGTGGAGAGGTGCTCTAGGCGCTCCATTGTAGCTTATTCACAATAATTGTAGCCTTTTTATCAA |
| **UV RESISTANCE LOCUS 8 (UVR8)**:  GCTCTCTCTCTCTCTCTCTCAATCAACTCATTCTCCTGCAGCTTACAGCTTGCCATTCCTCTTTTATGCCAGTGAACGGCTGCTCTCTTCTCTACAGCCCCTCCTCATGCTGCAGCCCTTGAAGCCCTATTCTCTCTCATTGAGAGGATATCAAGCGGCTGCTGTGGTTAGAGAGTTTTCGCGTGAGCCTCTCTGTTACTGGAGAGGCTAGTTACATTGAGAATGCAGACGTTCGTTCTATCAGAGAAAAGGATCTGGGTTTTGCATTAGATTTTCTCATACATACGCACAGGCCCATCAAGCTCAAGCAGGCTGCACAGGAATGGACGAGGCGTCTTCCAGGCTGAGGCAAAGAAGAGTGGAGCTCGTCTCAGCCGGTGCCAGTCATACTGTTGCGCTCCTTTCTGGAGACATTGTATGCTCTTGGGGTCGAGGGGAGGATGGACAACTAGGGCATGGAGATGCAGATGAGAGACATTTTCCAACAATTATTAGCTCTTTGGAGGAATGTGAAATTTCTTCTATAACATGTGGGGCTGATCACACAATCGCACGATCAGATTCTAGAGCAACAGTATACAGCTGGGGGTGGGGTGATTTTGGACGCTTGGGACATGGGAACTCGAGTGATCTTTTTATTCCTCAGCCTATTAAGGGACTTAAAGGGATTGAAATCAAGCAGATTGCTTGTGGTGACAGCCACTGCCTTGCTGTGACGATGGATGGTGAAGTGAAAAGTTGGGGTAGAAATCAAAATGGGCAACTTGGGCTTGGACACACTGAAGATTGTCTCATCCCCTGTACCATCCAAGCTTTCCAGGGAATATCTGTGAAGATGATTGCCGCTGGAGCTGAACACACTGCTGCAGTGACAGAGAGTGGCAAGCTGTATGGTTGGGGATGGGGCCGGTACGGAAACTTGGGATTGGGTGATCGGAATGATCGCCTAGTTCCCGGAGAAGTTCCATCCATTCCAGGCGAGCAAATAAGTCTTGTTGCTTGTGGCTGGAGGCATACAATAGCTGTTTCAGACTCTGGAACACTCTACACGTATGGATGGAGCAAATATGGGCAACTTGGGCATGGCGACCACGAAGACCATCTTGTACCTCATCAAGTGGCTGTTCTAAAAGCAAATCGCATTGTTCAGATTTCTGGAGGCTGGAGACATACAATGGCCCTTGATGACCAAGGAAAGTTGTACGGATGGGGTTGGAACAAGTTTGGACAGGTTGGAGTGGGAAACAATAATGATCATAACAGTCCTCAGTTGGTGAAAACCCCAGTGGAAGAGCGTGTCAATCATGTGTCATGCGGTTGGAGGCATACTGTGGCCATTTCAGCTAAATATAATGTGTTCTCATGGGGTAGAGGAACGAGTGGCCAGCTAGGTCACAAAGATGCTGTTGACAGGAATTTGCCAAAGATGATAGGTTCCTTGAGCGCAGATGGGGAAGCGTGTGCAGGGGTTGAAAGCTCAACTTCTGTCGCAAATGCAGCTGCTGCAAATTGGATTTCGCCTTCTGAAAGATATGCAGTCGTTCCAGATGAAACTGTAAGAACGCTTGCCAGTCGTCTTCACCAAATAGCCAGTGTTGGTGGCCAACGTCTGGAGGGCACCAGAGAAGATGCGAGTGTGCCAGATACTGATTTTAAACGTGTAAGGACGGAGTAGATCATACTCCAAAATATGAAGGGATTCATGATTTGTGCAGACTCTTGAGGTGGTGTAGGAGTTACGGCAGGAGTCAACCGATTAATCGTGGCGAAGAGGGTCGAGCTTATATAAATGGCTCACTGCTCTCTGCTATTTATGTACTTCAAACGGATCCAAATCTGTACAGGCAAACCGCTCAATTGTTTCTGAAATCTGCTTGAGATCCAATGGTACTAGTTTGTTTGGTAAAAAGATCTCACATTTATTATACAGTGTTTCATGGAAATCATTTGTAAGTGCAGTATGGTGCTTTGTGGCTATTTGGTGGCTCTGCTCGAAACACTGGGGATTTTACATTGCTATTTGGAAAATACGCTGGGCCTTTTGAAGCATAAAAAACCTGGCCATGTTCTTTACTATTTAAAAAGTGTCTATATGTTAAGCTTACGGTTAGAGCTGTGGTGATAAAGCAGCTTAACAGTGATGCTGACATATATTTGCCACCTGTTGAATTCTTTCCTCCTGCTGCACATTGACAGTTATTGCAACGCAGTTGATTTTGTTGGAGTCGATTGCCAATGTTCTATAAAGGGCATGTCAGTAAATGATATGGGTCATTGAGGTGTAGCTATGCCTTCTTTTCCAAAATTCAAGAAGAGCTACTTAATTGTTCTTCACCATGTGCACGCGAAGCTGAGTAAAATGTATGAGGAGTTCAAATTGTTCAGTATTAAATTTGACTGCAAATCAAACCAAAGGTTACTACTAATGAAGTATGCTGGTGCCTGATGTGTCGACCGTTCCAAGAGCATAATAATGCCACCCGACCCAAACTGAAGCTCAGTATTGAATAAACCAGCTCTGCAGATACTTTCTTGCAATCTTTTTTTTTTTTTTTTTTTTGTTCTTTTTTTTTTTTTTTTTTTAATGA |
| **ROOT UV-B SENSITIVE 1 (RUS1):**  CTTCAGTCCATCTTAAAATTTTAACTTTTTCACAGCAATCCTTTCTCTCTCTCTCGTTGGCTATTTGGTCTAGATCATACTCTCTCTCTCTCTCTATTTGGCATACTCTCTCTGTCTCTATTCGGGATTGTTAGCAAATGTAGAGGACCACTAGAGATGCTCAAGCAGGCAGCTCTTCCAAGGAGAACAGCAGCTCCTTGTCTGGGAAAGGAGCTCATTAAGACACAGATAACAACCCATTTCGGAAATGGTGAGTGCTTGCTGGGTTGTGGTTTTCAAAACCCTAAATTCTATAAAGCTAGGGTTTTTAGCAGCACAGACTTCAGATGTTCGAAGAAAAACATCTCTAGAATCTTGAAAAACAATATTTCTTGCTCTGCATGGAGAAGCCAGGGTGTGTATGAGATATGGCTGAAGGCTTCTTCATGTAATGGTAATGAAGAACATGGAAGATGCGACGGCTCTGACAGAGAGCGTGGAAGCATTTCTTCAGCTAATGCTTACAAGGAACATGGAAGACGAAATGGTGATTACAGAGAGGGTTTTGAGGATTTAAGCATTCCAAAAGAAGCAAGCTGTGGAGGAGGTGGCAGTGGCAGTGGGGGTGCCGGAGGGCATTGGGGTAGTAGCGGGGGCAACAATGGAGATGAAGGCGGAGACTGGTTTTGTCTGCTTGTAGGCGATGCATATGCTCATCTTTTGTTTTTGCTCGGGCTCATCTTTACGCACGTGAAGATTGCAGGGACCAAAGCTTTGATACCTGCTCTTTTATTGCACCTTTTTTTGCATAAAGATTTGATTGCCACTGCAGATGGAATTACCTCACCTGTCAAGCAGTCTCGCGACACTAGTGAAGTATGCAGAGAGCAAGCAAAACCAAGCAGTTCACATGAAGGAACACCCGAACCCGATGTTGTATTTGAAGTGCGAGGTGGTACTTGGAGAAGGCTGTTGATTGATGCTGACAAGGACGAGTTTGTAGTTGATCCTGTGAAAGAACCCAGTAAAGAAGCATTTGCTACAGATGATCATGCCCAGGATAATATGAAAAAATCTTATCAAGGTATGACTCTAGAGCGTACTATCAAATGGTGCACGGACCTTGTCAGAAACGTGATGCTCCCAGATGGCTATCCGAGTAGTGTGACAGGAGATTATTTGGATTATACATTATGGAGAATGGTCCAAAACATTGCGAGCCAAATCAATGGTGTGCTCACCACCCAGGCTCTGCTTTATGCCGTGGGTTTGGGTAAAGGGGCAATTCCTACTGCAGCAGCGGTGAACTGGGTATTGAAGGATGGTATAGGTTATCTGAGCAAAATTATGCTTGCAAAATATGGTCGCCATTTTGATGTGCATCCAAAAGGGTGGCGATTGCTGGCGGATCTCATAGAAAATGCATCTTATGCTTTGGAACTGTTGACTCCAACCTATCCACATCTTTTTGTATACTTAGGTGCAGCAGCAGGAGCTGGGAGGTCTGCTGCTGGTTTGATACAGGCTGCCACTAGAAGTTGTTTCTATGCAGGATTTGCTGCTCAGCGCAATTTTGCAGAAGTGATAGCCAAGGGGGAGGCACAGGGCATGGTTAGCAAATCCATTGGTATTGCACTTGGCATTGCTATATCTAGTTATGTAGGTGCTTCTGGACCAATGCTAGTTACTGCTTTTCTTTCGGTCACTGGTGTCCATATGTTTTGCAACTTAAGATCATATCAAGCAGTGCAACTTCGCACTTTGAATCCATACCGAGCAAGTTTAGTATTTGGTGAGTATATAAGAAGAGATGTAGTTGCCTCTGTGGAAGAAGTCAACGCAGAAGAGCCCATCTTTACTGAAGTCCCTTTGCTATTATTTAGGCTGAAAGGGCATAAGGATCATACCAGCAACTTACTCTCTTTGCAAACTAAAGAGGATGCGGCAATCATAGCAACAAAGCTGAACATAGGTGTTTCATTTGCTAATGTAATCAGATCACAAAAGGAAGCTGATGAGCTGTTCAAGATCTACCAAAATGAGCAGTATGTTTTGGCAGAAAGGCAAAACACTTATCAGGCAATACTGAAGGTGGGAGCTACATCTCATGACCTCCTCAAATTGATGCTTCAAGTGTGCTACCTCTATCAGCTGCAAAATGGACCTTGGAGATCCTTCGCCGAGGGGAAGTTAGATTTCCATGCTGCCAGTCCAGTGGATATCTCCTATAGACTTACAATAGATAACTTCGATCGCTTACAACAAGAACTAGCCTCTGCTGGCTGGACCACTTCGGATGGATTGGTTGCTCGGCCTCTACCTTATAGGCTACTCGAAACACCCCATCAAAAAGATGATTATTCCTCCAAACACACAAGCATGGTGTAAATTATGAGACCATTTTTGTGCGCCAGTTGTCCCAAAGCACTGTTTATCAAAACTTCCCTCTATTCGGCAAACTATCATAGTCATTAATGTCAAGGTTAAGGTAGTTCAAGGCTCCTATACCTTTGTAACGTCTTTTGAGAATGCTGATTGTTACAGGCTTCATTTTTCAGGTCATATTTGACCAACGTCCCAAGGTACTCTGATCATTTGTTGCAGCGAATTCAATCACACACATACCTTGAAAATGTGAGTTGTTG |
| **ROOT UV-B SENSITIVE 2 (RUS2):**  CACTGCTCCTAGAAATAGAAGAATAGAAGTATTGTGCAGAAAAAATGCAGGAGCGGGTGAGATGGGTGGAGCGGAAAGAGAGTGTTCGACAAGAGTTCTCATTCGACGGCCGTGCCTCCGACATCCTCTGTTCCAAGACTTTGAAAGACGAGCGACATTTCCCTAACCGTATTGTTGAATCCTTTCTAAGCCGGTTCTTCCCTCTCGGTTACCCTCACAGTGTTGCAGAGGGATACTTAACTTATTCTCAGTTTCGCGCTCTGCAACATTTTTCGAGTGCAATGCTATCTGTCTTATCAACCCAGTCTTTGCTATATGCTGCAGGTTTGAGGCCAACTCCCGCCCAAGCCACTGTTGTCAGCTGGGTTTTAAAGGATGGAATGCAGCATGTGGGAAAACTAGCATGCAGCATGTGGGGAGCTCGGATGGATGCAGAGCCTAAGCGCTGGAGGCTATTCGCTGATGTCCTGTACGACTTGGGGACTGCTTTGGAGATTGTTTCACCACTTTGCCCACACTTATTTTTGGAGGTTGCAGGTGTGGCAAATCTTGCCAAAGGAATGGCCACGGTCGCTGCTCGAGCAACCAGGTTGCCTATTTATTCTGGGTTTGCCAAAGAAGGGAATTTAAGTGACCTTTATGCCAAGGGTGAGGCGATTTCCACCTTATTCAATGTGTTGGGACTTGGTGTTGGCATACAACTTGCATCCACTATGTGCTCAACCATGCAAGGGAAGCTTGTGGTGGCTCCTTTGCTTTCAGCAGTACATTTATTCAGTATCTCTCAAGAGATGCGTGCAGCTCCTTTAAATACGTTAAATGCACAGCGAACTGCCAGCTTAGTTGCAGAGTTTGTGGAGACTGGCAAGATTGCTTGTCCGGCAGAAATTAGGTACAAAGAACGCCTTGTACTGCCAGTTTGCTTAAATGTTGATGCTGGAAGTGTCGAAGCAGGTGTTCCGATCAAGCAAGCAGTTGGCAAACCTTCAGTGTTGAGGGAACTCAAAGCTAAATTTCAAAAGGAGAGGTTCTTGCTGTGTTTTAAGGACAAACAAACAGAGATGGTACTGCATCATAATGCAACAGGAGAGGATGTATTGAGAGGCTGGCTGCTAGGTGCATATGCTGCAAGGATAGCTGGAGTTGAAGGCATGTGCACCGGAGCCAAAGGTTATGGGGAGCAGAAATTGGAAGCTCTTGGGAAGGCCTATGAACTCGTGGAGAGGTCGCTTCCAATTCTGATCTGTGGTTTAAGAGAGAGAGGCTGGCATACAGATCTGTTTCTGGAGGGCTCTGGAGAGCGAGCAACCTGGTAAAGGAAAGCTCTTTTTATACTGAAGGATAGATTGCATACTTTTCAGAAGCGTACAATCTTATTCTTAATGTTTGATGAAATGCAATACCATTAGTCTTAGTGGAGACCAGATCGATGTCAGGCTCTTTGATACTTGTTTTAAGTTGTCCTCCAAAGCACCCAGTTTGTAGTTGTTGAGTTTGCATGCAACCCAAGGGGACAGTGTCAGGTCCCGGCATTGTAGAGGGCATCCCATCTGCACCCCAATAGCCACAACCTTCAGGGAATAGTCCTTTATGTGAACCAACGTGTAGTTAGCCTTGGCTGTATCAATAGATTACTCTTGCTTATGTATCTATTGCCAATCTAAAGGAATTTTGTGGGCATTGTTTGCTTTTGAAGATTATGCACTTTCTTGACCAAGACTACAATTTGTGTATCAATCAGGCGTTACCAAATAAATGAAGACATTCAAAGTGTTAGCCTAAT |
| **COP9 SIGNALOSOME COMPLEX SUBUNIT 1 (CSN1):**  ACTTTACGAGCTACGAAGTTTGGCACCCCTGAAATAAGACTTTAATGAGAAATCAGATGTTTGGAATCAAACAAGAGGGTTCACTAGTGCCACTACAAGTTCTAACATCACTACTTAGGAATCATTAGCCCACACGCGGCAAATTTGGCTGAGAATTTCATGTAATAGGAACCCTGCACTTCTCAAACATGTGACCTAGACCCATTATATCAAGGCCATTCCCACACAATAAAGAGTCCTTAAGACAGAATCGGTCATACTCACCTGTATTCTCATTCAAAATTTTGAAAAAAAAAGGGACCTAGACCAGAATTTCATGTAACAGGAACCCTCCACTTCCCTAAGATTCTCTAAGTAAGAAAGGTTTTAAATAATAAGCCACCATCTTAATTGAACCAAGCCAATGATTAGCCACACAAGATGTGCTGAGACGAGGCTATCAGTGTTGAGAAATGTCTACTCTTACATTATCACTTTCTCGACCCTCCTCTTACCACAATCTCATGTTTCAAGAGATTTGCACGTACGAGCATGGCACGTGTATCTCTTTCAAAGTCCGACCCTGTTTGCAGAGCTCGCTGAAAAGTTCCATTCCTTTGGTCAGCATGACGTGCATGTAAAATCTTGTTATGTGAATCGATCCGAGCCTGAATTTGATTCTCCATAATTAAAGCTGCAAGCTCCTTCTCTAGGCCAGCTACAGTTGTCTTAAAAGCATCAGCCATTCGATTCAAATCCACAGAAATAAAAGGAGTTGTATACTGAATAAGAGCCTTGTGACGAATTAGAGTGTACAGAGATTCAACATGGTCATGGAGGTGAATATCTAGCAGCAGATTTGTCTTCAGCTTCTGCAGGTAGCCCAAGCAGGAAGCATAGCGACTTGCATAGAAATCATGTATAAGTTCTCGAACTTCTGGAACTAGCTCTAGAAAATTCTTGAAGTTAATATTGTCAATAACTTTGCTCTTCAACTCTGCTCTGTCAAAGGAAGCTAAAGCACAAAGACCTCCATATGTAGCCACGTCTTGAGGAGCAATGACTTCATTATAAGTAGCACCCAGTTCAAAGCTGGTATCAACAAACTTTCTGGCAGCAAGTTTGTACTTCTGATTCTCTAAATATGCAAGGCCCGCATCAACCCGCAGCTTTGCCACAACCTGAGGCTCCTGGTTATCAGGTGTCTGCTCAGCCTTCGAAACATAATTTGACACATGATGGAATTGCCCCAGGTTGATGGCAACAAGGATGACATTGAGGCACATAGATATGATATGCTTAGATGTAGTGCAGTAATCACGAGTTCGAACAAAGCACTTAAACGCTTGTTGCAAATCGCCTCGTGCATTGTGAAAGTCTCCCAAATCATTGTATCCCATTCGAATACTTTCTTTGATCAAATTTGTCTTGTAGCCGTTAAGCTCAGTTTCAAGGCGTTCGAGGCGCTGGGCAGACCGACGATCGACAGTATCCACCCACTCCTGGTCAAGGAGGAAAGTAGGGCCAAGGCGGGTATTGATTTTCTCACAAATCTCTTTGTAGAGGGAGGTGCTTTCGCCTTTGCGAATCTCTTCGTGGGCCATGCGCAGAGCCTCTAGCTCCATAGCCTGGTTGCGGCAGTGCTCAGCAATGAAGAAGAGGCGCAGGATCTTGGTGCGACCCTTGTAGAGGCTTGCATAGGCTTCTACGTCCATTTGGTCGCCTGAGACAGCAGGATTGTGATCTTCTGCTGCAGGAGATAAGCCCAAGGAAGAGGGCTCCATCTGCTTGCCCTTACGCTGCTCCTCTTCTTCTTCCTCTCCCTCTGTGTTTGGAGGATCCATCGCCTCCATATCGTCGTCTGAAAACATCTCGCTTTCCCTCCTCAGCTTCGATGCTTCGAATTTCAAGAATTTTCTATAGACAGA |
| **COP9 SIGNALOSOME COMPLEX SUBUNIT 2 (CSN2):**  CATGCCTTGTACACACTAGTCAACGTGACCTCAAAAAGTTCTACGGTGATCTCTTCTAATTACTCCAGAAGAAGACTCACTTATATAGCAGTAAAACCTTGTAATGATAAAAAGGTAGCATACAGGGTAGTCTTTCAAAAGCACATAGCGGAAGAGAAAACCTCCGCAATGTGCAAATTAATATGGGAGAGGGCAACCTGACAAACACCTTTCTTGATTGCATAGAATCTCAAGGGAGCATAAGCAGCCCAGCCCCTTTACAAAAGCCGATAATTTCCTCTGAAAGACCACAAAATTTTTTACTCAATTACACCAAGCTGACAATTCAATCAACACCACCTTTTGCATATGCAGCGGTAGTACTCCAAGCCAGGTTAGCCCACCCGTGTTGTGACCACTTGGCACAAACCCCTTAATTGAGTGTTCCACTTATCGATTGCTGTATACTTCTTTGGGCCTTTTGACCTGTCCCCGAGTTCAAGGAGCTGGTTGACCTGATCTATATGACCATGTACTCGATTATCCAAAATTAGCGAGACAAGCAGCTGCTCCACATCCTTTTCAGGAATATTCAGCTCCTGCGAGATGAATGGAATCCGTATCCGTGTATATGGTTTGATAAGCTTCAAGAGAACTTGTGTCCGAATGTTCTTCAGCAAGTCCTCAATGTAATTGCGAATGAATGGGTCGTCCATTATCGTTTTCCGATTACTCTTAATTATTTTCTCAAACTCCAGTATATCATTCCGCTGGTATGCTGCAACGAGATTGGTCATTGCAAGAATTTCAGGATCATTCTTGTACGGTTTTGCTTCTTGACCATCGAAGGGATTAACTTGAGACTCCATAAGCATGTTCGCAAGTACTAGGTACTTGAGACATTGGATGCGCCGATGCGTTCCTGCCTCATCGTAGTTCTTGAAAGCATCAAAAAAGTCTGTTGCAGCATCCGCCCATTGCCGTTCTGCCATGTTCATCTTTCCCCCACACTCGTGAATGATCCCCATGATACGTGGATGTGGAATTGCAGATTTGATGGTTAGCGCTTGCTTATACAATTGCTTCAATTTCTTGTTATTTTTTGTCTCTGTGTACATCTGTATCTCAATGGCATACACTTCCAATAATTGTGTGCCTTTCTTCTGATCATCTGAACCATCCTCTCTCCGGCAGGACTTGTGAAGCTCCTTCAGTATCTTGTTCATGCGACCATACTCTCCCATATCAAACCACAATTTGCAAAGCTTTAAATTTGTTTTGAACCATAGCCGCTCATTTTTGGCATCCTCCAAAGCCCTCAGAGTTGTCTGATAAAATTCTTGAAGTAATTCCATGTTCTGACTAGCACTTCCTGATACAAAGTCCAAAATATTATTTATACATTTCTCACTGTAGTTTCGTGTCACCGCTGATTTGATGTACATCAACATCTCTCTGTAAGCATCCATCATTTGCTTAAAATTGGCAAGACGATAGTGTAGTTTGACTGTCTGCTTCAAAGCCTTGAAACCCCATTCACCCTTCTCCCCCTCCATCTTGACCACCTCCGCAAAACCAGACAAGGCACCTTTAGGGTCCATTTCCACCAAACCCTTTGAATTGTAATATTGGTTTTCAATATCAACATCCTGCTCTTCTGGCTCCTCATCTGAGTACTCAAAACCATAATCTTCCATATCTGCATCTGAACCCATAGCTTGAATTTGCTGAGAGTCCGAGACGATCGACGAAGAGAACTGTTTTGTGTTAAGCGAGTTTTCGCAGCAGACAGAGTGTATGTTATTTCTGATTTTTGCTTCGGCCGGCCACAGCTGAAGCCCAAGTTGTGGGTTCAAATCTCTGAAAGCCTTGGATGATATTTGTGCCCTTGAGTTGTGGGATAAGGGGGGTCCCAATCCTATTTGTTCACCCGCCCTTGGGCTACTAGCATTTTGGCCTATTTCCTAGGGATTTGTAGGACCTAGTTATGAACCCTTCTCTCTCTAATGAATGTTGCCAACATTATAAAAACTCCTTAAAAGCATTGACATTAATATGGGTCTCCTATGTGTTCCTCCTCAAAATAGGCATTAAAAATATCTTTAACAATTAGTCAAAGTAGCCAACCCAATATAAAGGGCCAAATAAAG |
| **COP9 SIGNALOSOME COMPLEX SUBUNIT 6A (CSN6A):**  GTCTCAAGCTACACCATCGCTTCCATGTCCACGTGGACTGCACAGCAGAGGTGTATTGCATACATGTTGTGTGAATATCCACTTGGAGCTATTTATTATTTTCACACAACTTCGTTTGCGTAGGCTATTCACATAACTTCGTTTGCGTAGGCTTTTAATTAAAAAATGCCACGTCAGTGGCATTTTTTAACACAAACGAAATTTCTCTCCTTGAGTTTGTATCTCTAAATTGGTAAATTGTAAGAAGAAGCCCGAGAGCCTGGGTATCAACCGCGAAAGCAGCAGCATCGCAGCTCTCGCAGCCTACAGCTTCCCTAATCAGAGATCGCCATGGCTTCTAGCAGCGGCCTTACCTTCAAGCTTCACCCGCTCGTGATCGTGAATGTCTCGGATCACCACACGCGCATCAAGGCGCAGGAGAGCTCTTCTACTAGAGCCCCCCCTCGTGTCTTTGGCTGCCTCCTTGGATTGCAGACCGGCCGCACTGTCGAAATCTTTACCAGCTTCGAAACCAAGCTCTCTGAGGACTCCTCTGACTGCCTTGATCGTGATTTCCTCTACCAGAAACAAGAGCAATACAAAAAGGTCTTTCCAAAATATGACATCTTGGGATGGTATTCTACTGGAAGTGATATCCAGGAGACTGACATGCAAATGCACAAAGCTCTGATGGACATCAATGAAAGTCCTGTGTACATGCTTTTGAATCCAGCCATCAATCATGCCCAAAAGGACTTGCCAATCACCATCTATGAGAGTGAATTACATGTTATTGATGGAGTGCCATCACTGATATTTGTCAAATCAAGCTATACCATTGAGACAGTAGAAGCAGAGCGAATTACAGTTGATCATGTGGCTCATATCAAACCTTCTGATGGAAGCACTGCTGCCACACAATTGGCAGCTCATTTGAGTGGCATCCACAGTGCGGTCAAAATGCTGAATTGCAGGATTAGGGTTCTTCACAATCTCCTGATCTCTATTCATAAAGGGGAAATACCTTATGAACACTCGCTTCTGCGACAAGTTTCTAGTCTTCTTCGTAGACTGCCTGCCGTAGACTCTGCAAAATTTCAAGATGATTTTTTGATGGAATACAATGATACTCTGTTAATGACTTATCTTGCTATGATGACAAAGTGCTCAAGCACTATTAATGAGTTTGTGGATAAGTTCAACACAGCTTACGACATCAAGCAAACCAGACGAATGGGCAGGATGCCTTACATATAGAAGAGTATAGTAGTGAAACCTAATGGGACAGTCTTTTGCACTCGGCTCTGTATACAAGGATAAATATGGCTGGCTTGCATACATAGTGACACATCTCTTGGATTGGTGTGGGCATAGATTTCCGCATCTCACCTAATATTATGATCTTTTCGGGCCAAAAGTTTCGGTGTCAATTTATAGCAATCAAGTGGCAGAACATGGACCTTTTGGCAATGTGCAAGGAAAAGGCTCCACCGAACATTGAAATGTATAGGTGACTGCATAGGAGAGCCCATAGAAGCAAGTTTGGTAAAAGTCAGCCTTGGGCTCTGCAGTCATGGGCCAGTACAATTTTGATACCTGCTTATGGTTTACATGTTTTGTTTTAGTCATGGCATGTGCATGTAGTCTATATAGGTCGTGGATGCAACTAGTAAATGCTCAGAGGAGGTTCATTAATCGTCTTATGCGCTGGATATGCCTCTATTCAATTTTATGTAGTTTCATATACTTTAACTCGCAGTACACGGCAGTACTTTTCTTCATTTTCTTTTTCTCATCAATGACATATCTTATAAGAATTCCCATGGACCATTTTTTATGAAAAAATCATCCCAAATTCCTCATATTTGGTGCCTTGGGCAGATTAAGCTTGGTAGTGTAGGGTCTCATTTGCATTGGCATTAACCATGTTGTTAACTTTTACTTCACTTTCGAACATTACAAGAATATGTAGCTGCAAGTAACATTGCATGCATAATCATTTTCAAACATGTAACTTTTGATATCTCTTCTCTGTTGTTGATTCATACTTGGGCATGAAAAA |
| **DAMAGED DNA BINDING PROTEIN 1A (DDB1A):**  GGCGAACGCACTCGCGCGGGCACGCACAAGTCATTTCTCTCTCTTTCTTGTCTCGATGAGAGAGATTACTCCGAGCTTATAAACAAGTAACCTGAAGTTTCCCTCGCTAGGGACTCTGTAGGAGAAGGAGTAGCTGCAGAAGATGAGCATCTGGAATTATGTGGTCACGGCGCACAAGCCTACCAATGTCACACACTCCTGCGTGGGCAACTTCACTGGCGCCCACGAACTGAACCTCATCATAGCAAAATGTACACGAATCGAGATACACCTGTTGACGCCGCAAGGCTTGCAGCCTATGCTGGATGTACCAATATATGGACGTATAGCAACACTCGAGCTTTTCAAACCACCAGGGGAAGCACAAGATTTTCTATTCATATCCACAGAAAGATACAAGTTTTGTGTTTTACAGTGGGATGCAGAAGCAGGGGAACTTGTAACCAGAGCTATGGGAGATGTTTCTGATCGAATTGGAAGAGCCACAGACAATGGCCAGATTGGCATCATCGACCCTGATTGTAGACTTATTGGTTTGCACCTTTACGATGGGTTATTCAAGGTCATACCAATCGACAACAAGGGTCAACTGAAAGAGGCATTTAATATTCGCTTAGAGGAACTACAGGTCCTTGATATCAAATTTCTTTACGGATGCGCTAAACCCACAATTGCAGTTTTATTTCAGGACAACAAAGATGCACGCCATGTCAAAACATATGAGGTATTGCTCAAAGAGAAAGACTTTGGAGATGGTCCTTGGGTGCAAAACAATTTGGACAATGGGGCTGGTCTGCTTATTCCTGTGCCTTTGCCATTGGGAGGTGTCATCATTATCGGGGAACAAACTATTGTGTACTACAATGGGTTTGTTTTCAAGGCCATTTCTGTACGACCGGCTATCACCAGAGCTTACGGAAGAGTCGATGCAGATGGGTCTCGCTATCTCCTAAGTGACCTCACAGGGATGCTACATTTACTGGTGATTACTCACGAGAAGGAAAGAGTTACAGGCCTTAAAGTGGAGCGCCTTGGAGAAACGTCAGCTGCTTCAACAATCTCTTATCTGGATAATGCTGTGGTCTTTGTTGGGTCTAGCTATGGAGATTCACAGCTTATTAAGCTCAATCTACAACCTGATTCCAAAGGGTCATATGTAGAAGTTCTTGAGAGCTTTGTCAACCTTGGGCCGATCGTGGACCTGTGTGTGGTAGACCTTGAGAGACAGGGACAAGGGCAGGTCGTTACTTGTTCAGGAGCATTCAAGGATGGATCTTTGCGCATTGTTCGGAATGGTATTGGCATCAATGAACAGGCATCTGCAGAACTTCAGGGCATTAAAGGCATGTGGTCATTGCGGGCTGCTTCATTGGATGCATTTGACATGTTTTTGGTGGTTAGTTTTATAAGTGAGACACGCATATTGGCAATGAACTCAGAAGATGAGTTAGAGGAGACTGAGATCGATGGATTTGATTCAGATGCCCAGACCTTGTTTTGCCAAAATGTCTTGTATGATCAGCTCATCCAGGTGACAGCATCTTGTTTAAGACTTGTTGATGCAACTTCGAGGAGGCAGCTTAATGAATGGAAAGCCCCTCCTGGTTTGTCAATAAATGTAGCCACAGCAAGCTCCTCACAGGTTTTACTCGCAACGGGTGGAGGCCACCTTGTCTACATAGAGATCGGCCGCGGTCTTCTGATGGAGACGAAACATGTGCAGCTTGAGTATGAGATTTCGTGTCTGGACATCAATCCTGTTGGTGATGACCCAGACCGAAGTCATTTGGCAGCTGTTGGCATGTGGACAGATATTAGTGTGCGGATTTTCTCCCTCCCAAGCCTTGATCTCATAACAAAGCACAGTTTGGGAGGTGAAATAATACCTCGTTCAGTTCTCTTCTGTGCTTTTGAGGGGATTCCATATTTGCTTTGTGCGCTAGGAGATGGCCATCTGTTCAATTTTATCCTAGATGTCCATACTGGGCAATTGTCAGACAGAAAGAAAGTCTCTTTGGGAACACAACCTATTACTTTGCGGACGTTTCGCTCAAAAAATGCTACTCATGTCTTTGCAGCCTCAGATAGGCCAACTGTTATCTATAGTAGCAATCGAAAACTTTTGTACAGTAATGTAAACCTAAAGGAGGTCAATCATATGTGCCCATTTAACTCAGCTTCGTTTCCAGACAGTTTGGCGATTGGAAAGGAAGGGGAACTCACAATTGGTACAATTGACGATATTCAGAAATTGCATATTCGAACAGTCCCTTTGAATGAGCAGGCTCGGCGCATTTGTCACCAAGAATCATCTAGAACGTTCGCAATTTGTAGTGCAAAGTACATGCCAAATATGGAGGATATGGAAACACATTTTATTCGGTTGCTGGATGACCAAACATTTGAAAATATGGCTTCTTTTCAGCTAGATGCATTTGAAAATGGTTGCTCAATAATGAGCTGCTCATTCACAGATGACAACAATGTTTACTTCTGTGTCGGGACGGCATATGCTATTCCAGAAGAAAATGAGCCCTCAAAGGGCCGTATATTAGTATTCCTTGTGGAGGATGGGAAGCTACAGTTGGTTGCTGAGAAAGAGACAAAAGGCGCGGTCTACAACTTGAATGCATTCAATGGAAAGCTCTTGGCAGGTATCAACCACAAGATTCATTTGTACAAGTGGACACAACGAGAGGATGGTACAAGGGAGTTGCAATCAGAGTGTGGCCATCATGGACATATTCTGGCACTCTTTGTACAGTCTAGAGGAGATTTCATCGTGGTTGGAGATCTAATGAAGTCAATTTCACTGCTGATATACAAGCCAGAGGAAGGTGCAATCGAGGAAAGAGCCCGAGATTTTAATGCGAATTGGATGTCTGCTGTCGAGATTCTAGATGATGACATTTACCTTGGTGCAGAGAATAGTTTTAATCTGTTCACAGTGAGAAAGAATAGCGATGCTGCCAGTGATGAGGAGCGGGGCAAGCTTGAGGTTGTTGGCGAATATCATCTAGGAGAGTTTGTAAATCGCTTTCGGCATGGTTCTCTCGTCATGCGTCTCCCAGACAGTGAATCAAGTCAGATCCCCACTATGATTTTTGGCACAGTGAATGGTGTTATTGGAGTGGTTGCATCTTTACCACAAGAACAGTATATATTTCTTCATAAGCTTCAACAAAATCTTGTCAAAGTGATCAAGGGTGTTGGTGGCCTGAGCCACGAACAATGGCGCTCCTTTAGTAATGAGCGGAAAACAGTAGATGCTAAGAACTTTCTGGACGGTGATCTTATCGAGTCCTTTTTGGATCTTAACAGGACCAGAATGGAAGAGATATCCAAGGCAATGGCTGTTTCTGTGGAAGAGCTTTGCAAGAGAGTGGAGGAATTGACTAGGCTTCATTAAGTTAATGATATATTTCTGCAGCCTAGGCACTTGGGGATAAATTGTGCTCTAGCAGGCAAAATCAGCTGCAGGTTGTAAAAAATGTTGGCACAAAGCCCCTTCTTGGGGGTGAAAGCATTTTTCTTTCATCTGGCTGGTTTATTAGGTCTTGCAAGATCAGGAGGCAGCAGTGAAGCATAATTTTATAGAGCAGTGAAGCATAATTTTATAGAGTTCAAATGTAACTGCTTGGGCTTAACCCAAGAGCATTTTTTTTTCTGCCTACAGGGCTTGTTCTCTTGCAATGCTCATCTGCTCTGGTAGTGATAACAGAACATTTGCTGCCCCCTTGTGTTTCAATATATGGCTTTTACTAAATATGGCAATAAAGCATTTTTTGTCTCTCTGGGAGTCTCGTTTCATTCATGCTCTAAATTATAGACATTGAGTGAGCATACACGCCGTTCAAAGGTACTGTCTCATCATGTTCTAAAAGGCCAATTTGGATAGCCTAAAAATTGGTTTTCTCCTGCATATCTGGAGTTGTAAATATTGAGTATTCCAAACAGACATTAAGAGAACTATTGAAGCGCGTACGTAAGTAGTGTGGTGTAGGGAAAGAAGTAAAGTAGTTTTTGCGTGATGCAGTGTTTGCTCGATGCTTGTACTTGACATGAGAACACTGGAACAAGGG |
| **EMBRYO DEFECTIVE 168 (EMB168):**  GGACACACTAGGAGGAAATAAGGACACGAGAGCAAAATAGAACAGAGCATGAAATGCGGGAACGATTTGGGTGGTGGAGGCACTAAAGCCTTGTGTTTTGATCACGTTTCCTTTTGTTTTCCACTGACGCTACTGCCCGGAGGGCAATCCGACGCGCCCTTGTACCTTGTCACAATCCCTTTTCTATTGGGTCTCTGCGCTACGTTAAGGCAATCCTCGTCGTTGATCTGGGTCTTCAGCAAATCGTCGCCTTTTCTCTCTGTATTACCCATATCTGTATTACCCAGATTCTTTACTCTTTTCCTGTGTGCAGAGAATTGCAGGCCAGCAATGCCTCTATACAGGTCTTTTGATTACTCGAAAGCAGGTGATCTTTGAGTCCACAAGAGCTTATGGGTGTTTTGTATTAGACCAGGATGAGACCCAGTACCCATTTTTCCCATACCTTTGATCACATCGCTACACGAACGATTACCTGTCTTACCTCTTACAGGTCAAGGGCAGCTCCAATTAGGCTCCTACAGCATGCAACACTGATGTAGATTTTCTCACAATTGCCACCATGAACCCAGAAGGTTCGGTTGGCGTTCAGGTTCCATCTGTGACTGGCGGGAAGGGCGAGCCCTTACGGTCTGAGGACACTGATGCCGGGCAGTCGAAACGTGACCTAGATAAAGACATTTTATGTCCAATATGCTTCCAAACCATGAAGGATGCTTTCTCCACTGCTTGCGGACATAGCTTTTGCTACATGTGCATTATGACCCATCTCAACAACAAGAAGAATTGCCCTTGTTGTGGACTCTATCTAACTAACACACAAGTATTTCCAAATTTCCTTCTCAACAAGCTTCTGAAAAAGGCATCAGCATGCCAACTTGTAAGCAGTGCTACTCCCTTGGAACACTTTAAACTATACCTTCAAGAGGGAGCGGAGGTTTCGGTTAAGGATCTGGACTCACTCCTCTCTCTTCTTGCTGAGAAAAAAAGGAAGGCTGAGCAAGAGGAAGCAGAGACAAATATGGAAATACTTCTTGATTTTTTACACAGGCTTCAGCAACAAAAACAAGAAGAGTTGAATGAGCTACAAGCTGATCTGGAATTCATTAAAGAAGATGTCTCAAGTGTTGAGAAGCAGAGGCATGAACTTCTGAGAGCCAGGGAACGGTATTCGGTGAAGCTGCGCATGTTGTTACAGGGCTCAAGTCCTCATGTGACCAATGCAACTCCTAGCACGGGCAATGCAGTCTCTATGCCAAAAACTGAGGCAGGATTGGCCATGATATCAACGGCTCTAAAAAAAGGAGATGGCAAAGAGAGAGCTTCTTCCATAACCTTTCAAAAAAGAGATCAACCATTTGGCGGATCCACAGACTGCATTTCCAACCTTCAAGGCCCAACACTTTCTCCGAGCATGGCAATCGCAAAGAAGAAAAGGGTTTTAGCGCAGTTTGAAGACTTACAAGAGTGCTACCTGCTCAAAAGGCGGCGGATGGCACCCTCCCAGCGGCCGAGGCAGCTGGATTTGAATTCCAAGAAAGACAAAGATAGCAATGACAAAGATATTGGCAGTGCAGGCCTCGAGGACTTCCAAAACATTTTGAATGCCTTCACACGTTACAGCCGCCTTCGGGTAATAGCAGAAGTCCATCAAGGCGATTTGTTCCATTCTTCTAACATAGTTTCCAGCATTGAGTTTGACAGGGATGATAAGCTGTTCGCAACTGCGGGTGTGTCAAGGCGCATCAAAATCTTTGAATTTGCGACGGTCGTAAATGTCCCAGCAGAGGTGCATTTTCCTGTCGTTGAGATGTCGACAAGATCAAAACTTAGCTGTCTTAGCTGGAACAAGTATTTAAAAAATCAAATAGCGAGTAGTGATTATGAAGGCATCATAACCGTTTGGGATGTAAATACACGGCAGAGCATCATGGAATACGAAGAGCATGAGAAACGCGCATGGAGTGTTGATTTTTCACGAACCGACCCTTCGATGCTAGTCTCTGGAAGTGATGATTGCAAGGTGAAAGTTTGGTGTACAAAGCAGGAATCGAGTGTGCTTGATATAGATATGAAGGCCAATATTTGCTGTGTCAAATACAACCCTGGGTCCAGCCATTACCTGGCGGTGGGTTCAGCTGATCATCACATTCATTACTACGATTTGAGAAATACTCACACTCCATTGCACATATTCAGTGGACACAGGAAAGCGGTCTCATATGTGAAGTTCGTTTCACCTGTGGAGCTTGCCTCTGCATCCACGGATAGTACTCTACGCCTCTGGGACGTGAAAGAGAACTCACATATACGGACCTTGAAAGGACATACGAATGAAAAGAACTTTGTCGGGCTTTCTGTAAACAGTGACTACATTGCTTGTGGCAGCGAGACAAATGAAGTGTGTGTCTACCACAAGGCGATTTCAAAACCAGCAGCATGGCATCGGTTTGGGTCTTCAGACCTTGATGATAGTGATGACGATTCTTCCCACTTCATAAGTGCAGTTTGTTGGAAGAGTGAAAGCCCAACCATGCTGGCTGCCAACAGCCAAGGTACAATCAAGGTGCTAGTGCTGGCTCCATAATTGCTTGATTCAAGCCAACAGATTCTTCAATTTTGTGCCGTGTATGCTCATGCGCGATCTAATGCCAAGATGAAAACTATGTGCTAGTGAAATTCTTGTTTTTGAGGCTGCTCTACCTATCCCAATCAGGGTTCGAAAGGGCACATGATGCCATTATATGTTTCATCTCACTTGCAGCATGCAATCCCCTTGCCTGTCTGCCTTCTAAGGCTCCTTGTATTTGTGTTTCTATTGATGAGTAATGTTTTGTCCAATTGGCACACAGATAAATAGCCAATTTCCTGGCTTGTTGTGCAAAATGTTCACAAAAATTCAAGCAGCGACTTTGTAACCTGTAACCTTGTTATTCAAAAATTGCACAATGGGCATTACCACATCATGTCAGTATTTTGTT |
| **SPA1-RELATED 3 (SPA3):**  CTGTCTCAGGCTCCAAATGGCATAGCTGGCATATCCTATCCTCTGCAGGTATCCCCCTAAATCTGCCAGTTTCGACCACGAGAGAGAGAGAGGGAGAGATATGGACATCCATCCCTTCAAGGACATCTGATAAAACTGGAACAACACAAAGTACGACCCCTGCGCAATCATGACATGCACAAATCGGGAAATGGTTAAGCAAGTTATGGACATCCCAGTCAGCCATCCAAGGAAGCGTAGTCCAGGACGAGGAAACATAAAGAGGAGGTGCAGGACCATTTCTATGCTTCCCCTCCCCCCCCCTTAAGTATCAAAAATAAATTACATTTTTCTCCACTAGTTAGCATCCGCAGGTTGACCTTGTGGTGAAGCAGACCCCCGCTAAGGCAGGAAACAAAAATCTTGCATCAACATTTTAAAATACAAATTTAGAGGCATGGGCAAGAAATTAGAAGTCCCATTATATCAGCACTTGCACTTGTAATGCCTTGCACATTGTCGATTGTTTGTCCTCAAAACTTCAGCGTAAAAAAATCACAGGTCCAGGACAGCAAACTTTCTTACTCAATTTTTGTGGAAGATTGCACTCTCTGCCTGTATTATGGCAACATTGTACAAGCTTCTCAAATAAAAACGTATTGTACAAACTGATCAACAACAAAATTGTAACTCTGCTGTGATTCGTAACATAAAATCACCAATCTTGGCTGATCACTTCACAGAATTTGGACTGGACTTCAACCACCATCAAACAGATATGGGTCATCCGGATTGTAACCACTTCCTTTACATGCTAACCCTAACTAGAACAAACTGTTAGTATACTGCCTATTGAAGGAGTCCGAAATTTTACTGTACAAAATGCCTTGCTGGAATGTTCCAGCATATTATATATATGGGTCTGTAGGAAAAAATTATCATTACAGGTACAAGCTTTGTGGATGGAGCCAGATTCCTTGCAGCAAAAAGGGCAGGTCTGTACTTGCAGAAAACCCATCTGTTGCATCTCGAGGTAAGCCCCATCTGCTTGGTGCAGCAAAGGCTGCCAATCCACAATCTTCATGTCGAATTTGCAAATGCTGTAAGCATATCATGACTGTAGGAGAAAAACGGCATCGTAAGTATGCAGGTAAAAACGCATTGCTGAGAGGCCTTGCACCGACGATCGAACAAGATGCAGGTAAAAACGAATTGCTGAGAGGCCTTGCACCGACGATCGAACACTGGCTTCTGCCTACCAGGTATATAAATACAGATTTGAGCCTATCAATGTGATAGTAAGGGAACACTGGCATCTGCCTACCAGGTATTTAAATACAGATTTGAGCCTATCAATGTGATAGTAAGGGAAGGGAAGACAGAAGGCATCCCAGCACAATCTTCCACTTTTGTAACATCTTGAGACTGGTCCTCTCCATAATACATATGCCATTAATCAAGTCAGCTGTAATCACTAATGCCGTATATGTTTCCACTCACCTTGTGTAAAGTAAAGCAATTCGTATTATATTATCCTAAACCATCTCCAATACCTGAATATTCCCCACTGAGTTAGCTGTCACCAAAATTTGAGATTTCTTTCTCCAGCAGACACTTGAAACAAACTGATCCCCAATATCTTCAAGCTCTCGACCTGAAATTGGATCAGCATTCTTGAACTTGTGCGACAGCATGGTCTCCGGAAGAGACTTGTGGTAAACAAAAACCTCATTTGTTTCTGAACCACAAGCTATGTAGTTTTCCTCTGCAACTGAAAGTCCAACAAAATTCTTCTCATTGGTATGACCAGTGTAAGTGGTTATGCAATCACTCCTTGATCCAAGACTAGCACCATACCCTCTAGCATTTATGCTGGTTTTAGTCAAATCCCAAAGTTTCAGAGTGTTGTCAGTTGATGCAGACACAATGCCTGTCGGGCCCACGAATTTTATGAAAGAGACAGCCCTTTGATGGCCCGTCAAAATGCAAACTGGGATTCTGATGTAACGAAGGTCGTGAAAATACACTTGGCTATCTGCTGACCCAAATGCCAGAATATGGGAATGATCCGGGGAAAACTGCACGCTACATATGTTGGCTTTTGTCTTGATTGTCCCAACACTTGTACCCTGATTTGTGCTCCAAAGTTTAACACAGCAGTCATCACTCCCACTTGCTAGTTTTGAAGAGTCACTATGAGAAAAGTCTACGGACCAAGCACATTTGCCATGCTCCTTGAATTCCATAATTGTTCGACCAGCTGTTACATCCCATAACTGAACAGCCCCTCCAAGGTCACTGGATGCCAAGTAGTTTTTGCGAAAATTATTCCAACGAACACAGCTCAGTTTTGTTCTACTGTTCATCTCGACCACAGGGTAATGCATGTCATTAGACTCTTCCAACAAAGCATTACAGTCGAAAATTTTTATTCTTTTTGAAACTCCTGCTGTTGCAAAGAACTCGTCGTCGCTATCAAAGCTCACAGAGCACACCATATTTTTTGTGTTCAAAATGTCACCATACTGCAATGTAGCCTTGACGTCAAACCTACTGTACTTCATGAATTTGCAAAACTCATCAAAAAAGCATCCCAGTCGCCCGCCACTATCACCTTGTTCTGCTTTGGAACCCCTGAAGCTGTTGAATACTCTTGGCATGCCCATTTTCTCTGCACGTGACCCTTGCCCCAAACCACTTTGCCTGATGACGGCATTTGTCAATCGAGAGCCAGAATGATGCTCCCTCTTTATTAGTGAAAGGTAAGCTTCTCTCAAATTGGTGAAACTCCTCTTAAGCTGAGAAGACTTCGCAAGCACAAGTTCCTGCCTTCTACCACTCAACCCACTTCCGCTACAGCCAGAACCTAGGACTTCTTCATATGTAAAACTTTCCACAAGCCTGCTACTGTTGTTATCAAAACCAGCCTTCCGTAGTCTGTTCTTCAAAAGTAAAGCCTGCCATCTCTCAACCTCTTTGGTGTCTTCATCTAGCAAACCAAGCTCTTTAGCTAGCTTCTGAATGACGACACTCTTTTTTCGCTGCATCTGTAGGAGAAAGTCCAATGTTGTTTCTGCCTCCACCAGCTTCTCTTCCAGGTTCATTACAGCCTCTCTTTCTGCCAGCTTGTCTTCAATGTCATTAAAAACATCTGCACGCAAAATATCCCTTGCCTTAGGTCTACAGTCTGGATTTGGGTGCAGCAATAACAAACAGAAGGCTGCTTCTTTAGGATAATCCAACAGAAATGACGGTGGAAGCAGGCGATGTCGGAGGTCAGACATGGCCCTTGACCACTCTCCTTGAGATGCAGAGCTATAGAATAGCTCCAAGAAAAGCACTCCCAAGCTGTACACATCTGAAGGGAAGTCTGATGTCCCACCATTAATCTCCTCTGGACTTTTAAACCACATCAATTCCAACGAAAGTATCCCTTTCAAAGGAAACTTTTGGTCAATACGTTGATCTCCTGTATGGTCACTGGAAGAAGAGGTAAAGGAGCTGCCCCCTTGCTCTTCTGCACTATGTTTATCTTTGCCAAGTCGAGATTCTTGTCTTGCATCATCAGCACTCCCATGCCTAGAACTCATGCTTTCTTCATCAAACTGTATGTCCCTCGGTTCACAAACAGGGATGGCTGCAGCAAGCTCTTCTTGCGTCTCATAATCCATTTGCTGGGCAGACGCTGAATCATTTACAGTAGGCCTATCCATACTTGGGCCAATTAGTTTACCATCCATACAACCTGTAGCAGTAACTCTGCCAGTAGACTCTGCTGATGAGCATGAGTTTGTTCCCGAACTGGCTGACTCTATAATAGAAACACGATTCATTGACGAAAGAAGAAACGAAGAGGGACGGACATTCCTCAAGACAACTCCTTGAGAGTGAGCAAGCTCCACAAACTCTGCAATCTGTTTGAAAATGTGTATATTTTCAACTTTGTCTATGACTCTGGCTGGGGTACTAAGCCAGGCCCTGAGAGAAACACTAGAGTCATGATCTGCACGCCCACTGCTACTAGTATCTGATAAGCTCTCGATATCGGGGGTTCGCAAGTAATATGCATTTTGCTTCATATCTTCAAAATCGTGTTGACCCTCCATACCAGTGGCTGAAAGATTTCCAACTAAACTCCTTTGAGTGTAAAAATCCACGTTTACATCTGGTAAAACCAACTTTTTCTCACTTAGAACTGCAGGCTTATTTCCGAGTTGTTCCTCCTCAGGGTCCATTGAATGATCGGTAATCTTGTTATGTGAATACAGGTTCAAATTGCCAGAGTCCTTAGTCGTAGGGCTCTCTTCTTTGCCTGCTGATTGTGATGGTGCATTGGACAGTTCCAAATCTGATGCAGCTGGTTCCTTCTCACATGCTTCCGAGTTTTTTTCGCCCAGTAAGTGTGAATCATTCGGTAGGAGCAATTTGTTTTCCTTCATGGAAGTGTCTTTACTATGACTACTTGATCTTCCTTCATCAGCTGCTCCATCTTTGAAGCTGCAACTGGGAGGAGCATTTGAATTCACCATTGTGCGAGTCACAGGGTCTATAACACCTGCTATGATAATAAAATGAAGGTCCTGGACATACTTATTGATGGTTGCCCTTAAACCTGCTAACAATCCAGTATCAGAAACAGAAACTTTGTTGCTGTAATCAATCTTTTGATTACTAATTAACAGATTATTTGGCAGAAAATCATTGATGACATGACAAGGTAGAGGCCAAACAACTGTCATTCTGGATATCTGGAGTTTGGCTCCAGGAATGAAAACTGCATTATGAATCTTGTAAAGAACTCTCTAGTCTCTCACGCACTTTGCTGACCACGCTTCCTCGGCGTGCTTTCTATTGAGCCTGACTTAAGGGGAGCATGATTGCTCAGTAAACTGTACAAGAAGGTGGAAATGAATATCCATCAAATCTCAGCCATCACAAATAACACTGCGAGTGCGCCATATGATCGCTGTGAACTCGCAATCTTGAGAACCATGCGAACTGCACGATCATAATAAACTGATCAGAAGAGCTGAACGATCATCACAGCAAAAATGCAACGAGAGTAAAGTGTTGTCGAAGCAAGCGGCCATGGCAGCTAGAAGTTGCGCTGCCAGGAAGAGTTAAGTGCTGTCCAAGATCATAAGAAGTAAAGAGCGAAGGCGAAGCGAATGATCGGAGACAATTGTAGTGCAGGCAGAAAGAATGAAGTGGTGATGGAGGGCACACAGAAAGGGAGCACGAAAGAGAGAGAGAGTAAGGGGGAAGCGATGAAAGGAGATTGGAAGGAAGCCATGGAACCTGCAACGGAAGCTTAAACCCTAGGAAAGGATGGATGGATGGCAAGACAGCCAAATTGGGAGATAGGAAGAAGGGACCCGTATTGGCAGAAGCTCTCAGACCACACAATCGCATTTTTCATTCATCAGACCTTAG |
| **ROOT PHOTOTROPISM PROTEIN 3 (JK218):**  GAAAAACTCACGCTGGAGTAGATTTTACACAGGAGCGACTTGTACGAGAGGGGGGGCACATCACGCCACTACAGGAGTAGCTGGACCTGTAATAATCAATCAAAAGGGGCTTTTCTTTGAGTGAGCCCCACTACGTGTGGCTAAGTGGGGTAGTTACAGACAGCTGCCGGTTATGCAAGACTTGGCTGAGCGCTGCAGTGCGCTGGTAAACCCGACAGCTGTCGGTCACTTAAATGATGTATGAATATATTATTTTGAAAAATGAAATAGAGCCACCGTGGGCGGGCGGAGATGCGGTAAGAGGCCGGATACCGACAGCTGGCGGTTGCAAAGACTGCCGGTCAGACCAACAGCTGCCTCAAGAGATGGAATTGCGCCACCGGCGCGGCTGTTTTTGAAGATGAACAGGCGGCGCTGCAGGGGCACCGCCGCTATGTGTGCTGCTGTCGTCAATAGAGAAACGGGACGTAGGTTGGTTCTGGTGATGGAAAAGATTCCCGGGCGCTCGCACAAGCTTCTTCAGACCACTACTCCAAGGAAAACCAACGCCGCTCAAACGGCGGGGGGCGGGAGGCGCCGGCGGCAGGGTGGAGGCAGCGGTGCCATTTCCAACGGTGCCATGTTTAGAGGAGCGCTCAAGCTGGTGTTGAAGCGCGGTGTAATCAGCTTGGAGGTCAGCGTATTTGGACTTCATTTTCTCGACGTCCAGCTTGAGGAGGCGGATGTCACGGCGGGCTGTAGACCACGGGGAGGAGGCGGAGGCGGCGTCGTCGGATAGGGCGTCGGTGGGGACATGGCAAATGTCCGGAGGCAGGGGAGAGTCGTAGAAGGCTTGTGGAGGATGAGGCAGAGGGGGCCTGTGCGAGAGTGCGCTGCCCGTGATGGCATTGCGTAGCTTTACCTGCTCGCAGAAGAGGACCTGCACCACCACGCGCAACGGCAGCCTCTCGTTCTGCGCCGCGTGCATGCATGCGTCAAGCGATAGCTTCTGGCAGTCCATCAGACGGCACAGCTTCTTCCTGTCCACTTCCGACGTCGCCGGGTGTGCCTTGAGGTAGGTGTCGATGGCTCGATAGAGGCCATCATCACAGGCACGTGCGTACTCCGGGAGCTCCTCGGCCAAGGCTTGGAACTTGGGCACCGACAAGTTGGCATCTCGTGCCACCTCTGCCAAATAGCTATCTATAAGCTTTGCCACTTTTATCTTGGCATTTTGTGAGCTCATGCCACCGCCACCGCCGCCGCCTCCCACCCTTTGGTGCTCACTCATCCCATTGTAGCTGCACATCATGTTTATGTTCATCAAAGGACTTGCTTGTTCCTGCATTAAGAAATTCTCCACTACCCTCTGCACCAAATCGACATCGAATAACGTCTCATTTGTATGATTGAATGATGGTATTAGTAAATCTGTCAAGCTTGCTTGATCCAGTTGCATTCCCACTCTTCTTTCCAGCTCCTTCCTGCACATTACACTTGCATTCAACATGTTGGCAATCCTTAGCATCCTCAATAGGAAGTTGCAGGTCAAGGAGTCCTTCTGTGAGGGTAGAATTGTTACTATACTCTCTAGCATCAGCCTATTTTTGCTTTGCAAATTTGTGAAGGCATCTTTTTCAGTCGCACTAGTGACGTTAGTTACAACCGGAAGGCCTGAATCAGGTGTCGGAGTGCTTTCGATGCTTGATTCGATGTCTTTGTCGAGTCCCGGGATCCATTTCAATGCATATTGCAAAACAGCAGTGCCCACCAGATCAGATCTCATGCCTTTTGATTTAATAGCAGAGATTACCTTCACAAAATATTGCACACTTAGGCTTGACACATCCTCAACCCACCAATCCTGAGGGACTACTTTCTTTAGATCATTTTTTAAACCATTCCATACAGGGCTATCCCCTACATGGTTATTGGGAATACTAAAATGGCTGTTTATGCCATTCTCTTGTACTCCCCCCCTTCCAGTAAAAGACCAACTAATCCCTCTCGGATCCGTACACGCTTTCCACGCGATCGACTCGGTACATCTTCTTACAATTTGCAAATTCTCAGTCCATGGACATAAACTCTCACAGCTTTGCAGCACTGTGATAGAATCTTTCCATGAAGCTAGCACAACAAAACTTAAGAAGGCCTCTGTCTTCGATATGAGGTTTCCATCCTCTAGATCCTCTGTCATTTCGAGATACTCAGCCGCGCACCTCAATGATGCAATGCAATTGGCTGTTAGATCCACAGCAACCCCATAGCAGAACTTGGATGCCAATTCAAATGCCTCGGGACCTCCTGGCATGTCCGTCAGTCGAATATGATCCTTTTGCGTGTCTCGTGACTCGAAAACTAGCCGATTTAACCGCCCACTTCTTGATAACAAAGGGAACTTGTGGAGATTGAATGTGATATCACCTACTTCCACCACAAGATCACTTTGCAACTCTGTAGCAACAAACCAGGCTTGACCCTTTCTCTCAAAGCCATCAGCTTTAGTGCCCATTTTCATGGGGCTCATCATGTAGCTTCTGTTGTTCATTTGGATTTGGCCATCAGCAGAGCCAAGCAGCCTATTCACATGCCCTTTCAATTGCAATTCACTATCAGAGCTGAGCAGCCTGTTAACATTAACATGGCCCTTGAGGGGATGCTCTGTGTCACTTGAAGAGAGAAACCTGTTTACTTGGCTCTTTGCTTGCATTTCATTATCTGACCCGAAAATCCTGCTCGCTTGACTCCTCGTATACTCTTGCGTTTCGCTATCGGAACTAAGCCTTCTGCTGCTAGCTAATTCCCTCATGCTTGGCATTATGATCACCCCTTTTGCCTTACACAGTTTTGTAGAACTAATTCATCAATTTCTAACCTTAATTTTCAAGGTTCCACACCTTAATTATAATGATCATAAAGAAGAATGAACCTAAGGACTAAAAATCTTCAAGAGCTTGAAGAAGACTAATTTCTTCAAGGGTCTAACCTCAATCATAAGGCTCAACCCTTGATGAGCTTGGAAAGAAATTAAATCTATTCATGTGGGCTTGACAAAGTTTAAATGTTTTGCTGGTTCAGAGACCTATGTTCGAACCCTTAATGAGCTTGACAAAGAGTAAATGATTTGTTAAATCAGAGAGCTCATCTCAACAATAAGGTTTCAAACCTTAGTAGGCTCATATATGTGGATTAAACTGAAACACAGATTTAGAAGTACTCTAATGAGCATTTTCCAAGCCAGAATGCATCCATATTGTAATAGAAAAATATGAAGGGGGGTGTAGATAAAATCTGTAAACAAAAATATTATAACTAGAGGTAAATTCCTTTTTCTGTAAGAGTTATGTGTGAAAAGAGAGTAGGGCTTGATGCAAATTAATCAAGATTAAGGAACTGCTAATTCTGTAATAAGAATGAACTAGGATCTTATGACTAGTAGTGGGTATTTTTCTGTGGGGTATATTGTATGGAAGTAATGAGCCGCATGAAACAAAAATTAGCAGAAATTGAGGTGGGGAGGCAGCCAATCACTTAGCAGCATTACCCACACACACACCCATGACACACACACGGTGCCACACCTCTCT |
| **SHOOT GRAVITROPISM 1 (SGR1):**  TTCAAACTTCAATATAAAGCAAGATCACACGTTGCTAAGCAATAACAAAAACACAACTGTCGTTGAATCTCTTGCTTGAAAAATTTGTGGGCAAAATTACAAGGAGTCATCTTTTCCAAAATATGAAGCAAGTGCCCACAAAGGAGGTAATGCACTTGTTGCTTGATATCTAGCAAGACAACCACACTTATTGTTGAATCAACACATGAGATGTGGGTTGATCACAACCCCAATTGCTTGGAAATAAAATTCCATCACTCATTTTTCACATTCTGATGACCTTTTCTGCTTTGTAGTGCATGCATGTTGCCCCTTGTTCTTTGCACAAGCTTGATGTAGTTCATGTGGCAGCTACTTGCCAATGATCTTTTTTGCTTGGTAAATGATTCATGATTTTCTTCATCAATTTAACCTTTTGCAGAGCTTGAAATTTCATGATGCCTTCATTGAACCTACAAGGGATGATGCAGTGTCGGTGAAGACCACGCCGATGCTGTATACAAGCTAAGATCTTTCCAGCCTAGCTTGAGAAACCCTGCTTCTTCCAAGAGTGAGTATCCTTGACATGGGAACATATTGAGTAGCAGAGTAGCTTGTGTCGCCGCATTACCTGCTAATGAAACTTGCCGGAATCCAGCAGTGCTCATCACTTCCCTCCAGTTATCAAACTTCACTTCCCCTGTTCTAGCAGGACCTCCAACTGCCACTATGTTCTTCATCTCACTTGAGATCAATTGTTGCTCTACAGTATGCCGTTCCTCGCTGTTCTCCGGGTGGCTCGCCCCCAGTGAGTCAAAGAGAGCTGAATAGTAGTGCAGAGCTTCAACAAAGCGGTTGAGAAACGCGCCTGCATGGCTTAAATCTTGCTCCACTATGGTGAATACTGTTGGCTTCAGCTGCTGAAAGAGCTGCAATGTGCGGCTATCTGACCCGGTCACATCGTATAGGGAATGTTGAAGCCAATGCACAGCTAGTGCATCCCCTTTCCTAACCTTAAGAGATGTCAAGTCAAGGTTTCCAACCCTATCTGCCACACTATGAAACTCAAATGGCATACAAAGAGTACTAGCAAAATCGGATAGCCTCTTACCAGTCGCCTCTAGAGCTTCAAGGGATGTGCCAATGCCTGTGATGCGCACACACGGTGGCCCCTCTGGACGAGATGCAAGGATGTGGAAAAGTGCGGGCCATTGTAGGCCTTGCATTATATCACAATCTATGATATGTACCCTTTGATGCCCTTCGAAAGCTTCAAGAATTGCTTGGTTTGCTGTGAAGTGAGAGAATTTTACATAAGGGCATAAGCCGTTGAAGATTTGGAAAGCTGACGCGATGCTTTGGTTGCAGAACCTTTGCATGGCAGGCAAGGGAGAGCATATGCCCAAGCAGGAGTTGAGGATTCTCGCAGCCATGCCCTCTGTGAAGTATGCAGCCACCCTTTGGATGGGATTGCCATACGGTGATGACATCTCATTCAGCAAAGGGATCAAGGTGTTGGCTATCTCTAGATTGTCAGTTGCAACCGCTTCAGCACATTGCAATAGAAGAGAAAGGAGCTCTAAACCCTCTTCATCCGACGGATTCACATCAACATGTGCAGTATTAGCCACATTGCCCACCTTTGATGACACATCATCCATGTTTTTGTATGCATCCGGAGGTGGCTGTAGCATTATCTCTTGCTGTTGTTCATCCATGCTGTTGTATGCGTTTTGTGGATGCCGTAACATGATGTCCTGTTGTTGGTGGTGGTGATTTGATAAAATCCCTCGCTGTTGTTGATGGTGATCTGGCATAATCTCTTGTTGTTGGTGCTGCAGCGGGGCCATACATGCCCTTGGCCCATCAAAGTCTGTGTAATGCCCTCCTTGATTGCCCCCATTATACACAGGCAGTTCACATATTTGTGAATTGTAGTCAGCCCTGTGATTGTCACACAAGTCTAAAGACAAGCACAAGTCAGCTGCTCTGGAGTCTTTCTTTGCCTTGTAATCAGAGTTCCACATCGCCAATTCCTCATGTGTTCGTTTAGATTCGTGTCCAGTGTCTTTGATCAGATAACTGTTGTGATTGCCATTGAGAGCATTGTGATCTCCATTTTGAAAGTGATTGCGCTCACTCATTGATTGAAGCCTTTGGCATTGCTCGACCTTTGATACTTCTGCACTAAAGACTCGCCGATTCCTACCCTCCAAGTCAAGCTGCAAGGCATCAACCTCCAGGATGTTGTAGTCTCGCCTCCCTTGTGTGCGATGCAAGTGAAGACCATCAATGCGTGGCCTTTTGGATAGGCTGTTGTCGAATTCATCGATGGAGGATGAATTCTCGCATTTTGATTCAAGAAGCTCACGCGGTCTGATAGAGCGAAGGCGGGGGTCAAGGAAATGATCCATTTGGAGTGTGTCAAGGACCTGCTCAACTTGCACATTCCAAGGAGAGAGCACATCGGATAGCATGCTAAGCATGTCTTGCACAGACATTTCGGGCATGGCTTCAGCGAGATCATTCATCATGGTATACACCCATGTCCCCAGTACAGTAGAATCCTCCATAGCACATGCACCTCTTTTGTGAACTGTGAAAATAGCAATTCCTTGCTTTATGTATACATGCCAGATTAGGGACTAAATTGAATGACTAAGGATGCCTGTGTATGTGAGAGGCACTCTCTACAGAAGCAATTCCCAGATTAGTTAAAACACTTGAGAAAGTCATTCCTTTGTGTGCAGGACAAACTGTTAAACTAGAAAAGGCAAGGCTTATGCCAAGAATAGAAAAATTCCAAGACAGCTTGTTGTTATGTATGTACGTTTATCTGCAAGAAGACTCAAATTGTGTATGGGTTGGGCTTTGTATTCAGATATGCAGGTGCTCTGTATGCAATTGAAGGACCAAAAATTGCTAATTTAGAGAGAGAGAGGGAGAGAGAGA |
| **SHOOT GRAVITROPISM 2 (SGR2):**  AGAGAGAGAGAGAGAGAGGTTTCTCCAGAGAAGGGTTGAAGCGGCAGGCCGTGCTTGATTGTTATTGCAAACACAGATGAAGACAGAGCGTCCATTGACCAATCCAGAGTCTAGGCTCAAGCATGCTCTGAATTCCTTAGAAGGCCGAGAGAAGTACAGAGCCATGACCAACAGCCCATCAGACGGCGACGACGTGCGCTGGTACTTCAGCAAGGCCCCTCTCTCTCTTCAAGCGGTAGCGGCCTCAAGTCCATTGACAGAAGTTGTAGGAAAAAGTGACTTTCTTCGTTTTAGTGTAAATGATTCTCTGTCCCTTGAGGCAGCATTTTTGAAGGAAGAGGAAGAACTGGTGTCAGCCTGGTGGAAGGAGTATGCGGAATGCAGTGAAGGTCCATTAGAGGCTTCAGCTAAAGGGCAGCCGCCGTCAAGTGCAAAAGAGGGCACAGAATCTGAGAATTCTTATTCAAAAGAGGCTAGTGAAACCTTGGAGCAGTTCAACGACATTGAGCTTTATGAAAGTGATGAAGTGATTGGTGTCTCTGTCAAGGGTGGTCTCTATGAGGTTGATTTGTACCGGCGACGGTGCTTTCCTGTCTATTGGACTGGTGATCATAGGCGAGTGCTGCGTGGCCATTGGTTTGCTCAGAAAGGGGGTCTTGACTGGTTGCCTTTACGGGAGGATGTCTCCGAACAGCTTGAGTTTGCTTATCGAAGCCAGATTTGGCATCGACGAACTTTCCAACCCTCTGGGAAATTTGCTGCAAGGGTTAACCTACAAAGCTCCATCGAGGGACTGCATGCCTTGTTTACTGGAGAGGATGATACATGGGAAGCATGGCTTGGCATGGACTCATCTGGGATCTCATCAGTCCTTGGTTTTAAAGGAAATGGCTTTAAATTGCGACGTGGCTTTGCCCCATCTCAATCACCACAGCCAACACAGGAGGAATTGCGCCAACGTAAAGAGGAGAAAATGGATGATTACTGCTCGCAGGTACCTGTTCAACATTTGGTTTTCATGGTGCACGGAATTGGACAAAGACTCGAGAATGCAAATCTTGTAGATGATGTTGGTACATTTCGGATTACAACAACTCTTCTTGCGGAGCAGCACTTGACTACATATCAACGTAACAACCTACGAGTGTTATTCATCCCCTGTCAGTGGCGAAGAGGGTTAAAACTGGGTGGAGAACAAGCTGTTGAAAATTGCACGTTGGAAGGAGTTAGGGCTTTGCGCACAATGCTTAGTGCTACTGTACATGATGTGCTTTACTACATGAGTCCGGTTTACTGTCAGGATATCATTGACTCAGTAAGTGGGCAGCTGAACAGGCTTTATTGTAAATTTATCAAGCGGAATCCAGGCTATGCTGGAAAGGTTTCAATATATGGCCATTCTCTAGGAAGTGTTCTTTCTTTTGACATTCTTTGTCATCAAAACAAACTGACTTCAAGCTTCCCCATAAGCCAGCTACATGAGAACAGTCTCGACATTAGAACCTCAGAATCGCTGAACAGGAATGATGATTTAGTAGAACCTGAGCAGACTAATGAGAAGCCTTTGACAGAAAATGGTCATGCACAAGAGTCCCATAAACATGAGACAAATGATCAAGAAATTGATAATGAGATTGCAAGGCTGAAAGAGAAAATAGCAATGCGTGAGGAAGCGCATAATGCCAATAAGCAGCAGGATGAGATTGGTAACGAGTACACTATGGAGTCCAATAGACGAATAAATCAAACACAAGATGTGCAAGGAGACCTTGAGCAGTCTCCTGAAGGAAACACAATGGACTGTAAAATACTTGGGAACGTGGCTAAGAAAGACCATGAACCGATCAAACAAGAACCTTTTTGTTCTAGTGGGCCATCAACTTCCAATTCATTCAGGCAAACTAATAGCCAGAAAAGTTCTTTAAAGCCTAGATCCAGCTCAAGGAAGAGGTACACTCCCTACATTGAGTACACAAAGCTTGCTTTTGAGGTGGATACTTTCTTTGCCGTCGGGTCTCCAATCGGAGTGTTTTTATCTTTGAGGAATATAAGACTTGGAATTGGCAATGGAAAAGATTACTGGCAAGATGATGGAATTGACGAAGAGATGCCTGCATGCAAGCGGATGTTTAATATTTTTCATCCATTTGATCCAGTTGCTTATAGGATTGAGCCTCTAGTGTGTAAAGAGTATGTGCACAACCAGCCTGTTTTTGTGCCTTACCATAAGGGAGGTAGACGTTTACACATCGGTGTGCAGGAGTTTGGAAAAGAAATGTCTGCTCGCTCCAGGGCTCTTGTTCACTCTATTACTGTCGCCGGAGATCGTGTAGTAAAAGTTTTCTCATCAACAGCAGAACAAGATAACAAGGAGGAAGCGCAAGAACCAAAAGAGAGAACTTACGGATCATTAATGATTGAAAAATTAACTGGAGATCCTGATGGACGGATTGACCACATGCTACAGGATGCAACTTTTGAACATCAGTATCTTCAAGCAATCAGCTCGCACACGGCTTACTGGCAAGATGCTGACACGGCGCTCTTCATAATCAAGCATCTCTACCGTGACATTCCTGAAGAAAACCCCAAGTCCAAGGCTGAAGTAGGTTCAAATACAGAGAGCATGGACGATTCTATTTCCATTGAGCCAACTCTGTTCTTAAACCAAAACAATGTAGCTGGTGAAGTGGCCTTCACCTTTTCTCGCAGCGATAGCTTGACAACCACAAAGAGTGATTTAGCTCAACAAATTTGAATCACATGTGCAATCATAAAACTCTCTGTAAATAATGTAATCAGGTTAAGTATAGCAACTTCCATTTTTATGCAGTGTCAATGTGAAATAATTAATTGTGCAATATGTATAATGATTACATCTTTTTGTCTGGCTCTCCCTGGATAGACATATAAATCAAAATTTGTAGACAGGTCTTATAAATT |
| **ATP-BINDING CASSETTE B1 (ABCB1)**:  GCACATAAAGATTAACAAAGCATAAGTTAAACAGCAAATCCAAACCCAAGACAAACTCACCAAAGCTTTGTTTCGCATTTTGCTTCTGCTTTGAGTTTGCGGGCGCCATGCATTCTCAAGTTGCCTTGCTCAGAAGTAGTGTTTTAGCAACACCTCCACGAAGAGATAGTCAAAGAGAACAAATACATGAATGAATGAAGACAAGCAAGAGTGTTTCTAAGGACAAGTTGATAGAGATTATAACCTAACTACACTAGAGTCGCACACAGTTTGTCAAAAAGGCTGGTGGTGAATGCACCAGATAGCACATACGTTTTCCATAAAGAGGGATTGTGAAAGCTATGGGCTTTAGTGATTTTTGTTGGTGTACATTTTGCAGATACACTCTTTTTAGTTCACAAGCAGTATTTATAGGCTTAGAGTGCTTGCAAAACGGTACCGGATCTCTGAAATTGCTCTCTGAAATTAAAGGTTGTGGTCGTCACTTCAAGGTCTCGTGTTGGACGTTCACAGGAGAGAGGCAGGCTGTCAAGATCAGCTCCAAGTACCTAGAAGCTTTGCTAAGGCAGGACATTGAGAAATTTGACACTGGTTTGCAAACAGGCGAACTTATTGAAAGCATTTCCAGTGATGCAATACTCATACAAAATGCCATAGGCGAAAAGGTTAGAAGCTTGAAAAGGCTGGTATGTTATATGCAATGTACCCAGGGGGTGGCTGCAGGTGTGGGGCTGGCAGTCCCCCCACCGAGGCCACGGTTTCTGCACCTATGCGATGACTCTTCTGCAACAGCCTGCGGCGATGAGGGATAAGAGAAGGGAATGGGCACTCAGGAAAAATGCCCAACACTTCTTGTGATATGTCTGCTTCAACTCTGAAATCTGATTCACTGTTTTTATGCAATGTGTGCAGATGGGGAATGCCATTCACTTTATGAGTACATTTGTTGCTGGACTTATCATTGGGTTCGCCACTGTATGGCAAATGGCACTTGTAACAATTGCTATAGTGCCTTTGATTGCTGCCGCTGCAGCTCTACAAGCTTACATGTTAACGAACATCTCGGCCAAAAGCCAGGAGGTTTACGGAAAAGCTGGCGCCATTGCAGAGCAGGCCATTGCCCAAGTTCGCACGGTATATGCTTTTGCAGCCGAATCGAAGACAATGCAAACATATAACATGGCCCTCATCAAGGCACAGAAGCTTGGCCACAGGATGGGTTTGATAAATGGGCTCGGTCTAGGTACTATGTTCGCAACAATATATGGAAGTTTTTGTTTACTCATCTGGTTTGGAAGCATTTTGGTTATCCATAAAAAGGCCAAGGGTGCAGATGCCCTCATCACCATGTTTGTTATTATCCTTGGCGGCATTGCTCTGGGTCAAGCTTCTCTTAGCTTCTCAGCATTTGCACAAGCACGGGGGTCAGCTAAGATCTTTCAAACAATTGAGCAAACTTCCAACATGGAGGACAGTCAGCCAGATAAATATAAAAACACAAAGCTGCAAGGAGAGATTGAATTTCAAGCCGTGGATTTCTTTTATCCCTCAAGACCAAATGTTCCTGTTTTGAACAAATTTTCCTTGACAGTTTCAAAGGGAAGGAATGTCGCTATAGTCGGAAGTAGTGGCTCGGGCAAAAGCACTCTTATCTCGCTTCTCGAACGGTTTTACAACCCAACAGCAGGTTGTATCTTGCTTGATGGACATGACATAAGAACCTTTCAACTGAAATGGCTAAGGCAGCAATTAGCTCTAGTTAGTCAAGAGCCAGCATTATTTGCAGCCTCCATCAGAGAGAACATACTCTTGGGAAACGAGTACGCTGGAATGGATGAAGTCGAGAGTGCTGCAAAATTTTCTCAAGCACATGATTTCATTGAAAATCTCCCAGCTGGTTATGATACTCAGGTAGGTGACAAGGGTGCACAATTATCAGGGGGCCAGAAGCAACGGATTGCAATAGCAAGAGCAATACTCAAGAATCCGAGTATACTTCTCCTCGACGAGGCCACAAGCGCATTAGACTCTTCATCAGAGAAGCTGGTACAAAATGCTCTTGATCAATTCATGATTGGGAGAACAACCATTGTGATTGCACATCGCCTTTCCACCATTCAACATGTGGACACAATTGTAGTCATGGAAAAAGGGGTCTTGGTAGAGAGCGGTGCACATCAAGAGCTGATGTTGAAAAGACAGAGTGGAGCTTACTACAAACTGGTTAAATTGCAAGAGATTAGTCATGCAACTGCAAATGAAAATGTATTTGTGCGGAGAAATTCTGGTAGATTGACTCCTCGAATGACACCCAAGTCCACTCCTAGGAGAAGACATTCATCGCCTTACATTTCTCCCTATTTGGGAGCATTATCATTGCCTACTGAATTGTCTCAAAGTATGTTGACATATCTAGAACCGCAAGGGAACGATACTAGAAATGAGATCGGAACTATAGAAGTCACAAATGATGCTTACTTCAGAAGGCTTCTCAAGATCAATGCACCAGAATGGCCTCAGGCGATCTTTGCAATATTTGGATGCATCTTGACAGGACTTGTTACTCCCTTTGGAGCTCTGGTATTGGCTGCGGTTGCAAACATTTACTACACTAAAGATCCGCAGGAACAAGTTCGTTTGTATACAATCTATTTTGCCATAATAGCTTCAGTTGGTATGATAGGATATGTCATGCAAGAGTACTTTTGGGGATATGTAAATGAGAACCTAACAAAAAGAATACGAGAACGAATGCTTTCAACAATCTTAAAGAACGAAGTTTCTTGGTTTGACAAAGATGAAAATAGCAGCAGTCACTTAAGTGTTCGTTTGGCCTCGGATGCTGCAACTATTCGCACTACATTTGGTACCAGGCTCTCTTTGCTTTTGAATAATCTTACGGTGTTGACAGTAGCGTGCATCATATGTTTTGTCTTGTCATGGAAGATGAGCCTTGTTACTCTTGCTGTCTTTCCTTTAGGAGTATCAGCAGCTGTTGCAGAGAACATTTTTCTTAAAGGATACACTGGTGACATTGAACTGGCCCATCAAAAGGCAAGCAATATAGCAGGCGAAGCCATTGCGAACATACGAACTATTACTGCATTTTGTGCAGAGGAAAAGATCCTCTCTCTGTTTGTAGCAGAGTTAAAGCGCACTGAGAAAAAAAGCCTTGCTCGAGGACTAGTATCTGGATTCATATTTGGCAGTGTAAAATTTGTGCAATTTTCCTCGTATGCTATCGCGTTATGGTATGGTTTGCTTTTAATGAAGCACAACGAAGTTAGAGGTGGTGATGTATTTAAGGTTTTCTTTGTTCTCTTGGTGGGGGCTACTGTAGTTGGAAATGCAATTGGCGTAGTGCCAGACTTGCTGAAGGGTGGTAATGCTCTTGGACCGGTGTTCACAATTTTGGATCGTGAAACGCAAATTAATCCTGATGACAAGCATGCGCCCTGTGTTGATGGAATGAAGGGAGACATAGAGCTAAAGAAGGTGGATTTCAGCTATCCTTCCAGGTTAGAGGTGCCAGTTTTGAAAGAATTGAGCTTGACAGTGCCTGCTGGGACCAGTTTGGCATTGGTAGGGCCGAGTGGGTGTGGTAAGAGTACTGTGGTTGCACTGATTGAGAGATTCTATGATCCTGTGAGAGGCAAAGTGATGGTAGATGGAGTGGATATAAGGACATATAACTTGAAATCTTTAAGGATGCACATTGGGCTGGTGCAGCAAGAGCCGGCACTGTTTGCCACTACCATTTACGACAACATACTGTATGGAAATGCGGAGGCTACTCACGTGGAGGTGGAGGCAGCAGCAAAGGCAGCCAATGCACATGACTTTATAAGTGCACTTCCAGAGGGGTACAAAACTTTTGTGGGAGAAAGGGGAGTCCAACTTTCAGGTGGACAAAAGCAGAGGGTGGCCATTGCAAGGGCTATGGTAAAGAACCCAACCATTTTGCTGTTAGATGAGGCCACAAGTGCACTGGACACCGAGGCAGAGAAGGTTGTACAGGAAGCTATTGAGCGGTTGATGAAGGGACGCACGGTGGTGGTTGTAGCCCATCGTCTCTCGACTATTCGTAATGTGGATTCCATAGCTGTGTTGCAAGATGGCCTAGTTATTGAGCAGGGCAATCACACTCAACTCCTCTCAAAACCACTTGGTGCATACTCTCACCTAGTTGCGCTACAAAGCCAGGAAGCTTCTTCCTCCTGAAAAAAGACACTGATTCAGGCTGTCCTTACCTAAACTTGTGATGTCACAATTTATTGCATCAATTCTGTTTTTTGTTTTTTTGGCTCTCTGCTTATCTCAATCACATGAGTTTGTGGGCAGAAAGACCAAGCAAGCCAAAGGCTTAGCAGAACTCAGCACTTTTTCTCTCTATTGTGCCCTAACAGTATATAGTTAGTGTTTCCTTCCTATAGTTCCAAATGGCATTTGAACCTTATTACCCAATCTACTGAATACTAGCCCATCCCAGTGCCTATTTAACATCCTCAAAACATTGACATGAATAGACTTGAAGAGCACTTTGCAAATCTGCATATCTTGGGCTGGCAATGAAAAAAGGGATGACTTTTCCTTCCTTATTAGTCACATCAATCACTTTGCAAATGCCCTTTTGAAGTGGATAAGGGGCCCAAGCAAAGTAATAGACACTCTCTTGCAATGTGGAGCTTGCAATAGATCTTAGCCTTTTT |
| **CORYMBOSA1 (CRM1)**:  ATTTTCAGTTCAAGATACCAATGTGATGGTGGGTGGGCGTTTTTTTTGGGGGGGGGAGCCATGATTGGACCAGAGCTGAACATTTGTGATGTTAACCATCTTATACAACATTGATCACCCATTATAATACATTTACAAAAACCTCTCATGAGGGAAACCGGCCAAACGTCGTAATGAGTTTGAGATTCAATGGCAGTTTATGTTGCCATCAGTATATATTTCAAGTTTTCATTAACCTTCTCTTGTTTACATCAGCTTCAAAACTCGTTTTTGCACACCACCATGGGAATGTGCAAAGTACCTATACAGAGTACAAATACATAATTCTAGCAACCAGTGGTTTCTTTGGCAGATGCCCACTTCTGCACAGCTTCCATCAATCCCTAGCTGCCTTAGCAACTAGCACCCATATTTCTTGAACCTGAGTCTCTCAACTGTGACCTTAAAGTTTGCGCACTGAGTGATCATGCTCTACTCCATATTCCACCTTTTATATGCTGTACGCCATCTGTGAAGCAACCATGTGGAGCAAGTGCTCGTAACAGACTGCTTTGCTCCAGAAAGTCCTATCTTCAAGGAATGCAAATCTTGCATTCCTTCTCTTTTTGTATAGTACTACCTCATTGTGTCATGCAGTCCACGCCTTGGCAGAGAAATTATTCACCAGCTACCGAAAGCTTCACATTGTCTTCCATTCAAGACTTCGATTCCACAGCAGACAAGTGCCATTGCTGTTGGTGCTTCAGGCTCTTTCTAAGCATTTGAAATGCAATTTAACACTTTTAAGTGTATCATATGCAGGAAAATCATATAAGAAAAAGTTCTCTCATTGTAACCATATAGGCAACTCGTTGCTCAGTTCAGGGGAACTTGAATCACCTTGCCGTGTTAGAGCTGATAGCATCCTTGATAAACTCTTCACAAGAGGAATGACCTGCTAGAGCATCTGCCAAAGCTCCCATGACATCAAAAGCCTCCTGCAAATCTTCAGCACCTTGCATTTCAACTAACCACTCAAGCAATTTAGTTGAAAATCCCAGCATAGATTTTATATCCCGCAATTTTTCTTTCATTGTTGATTCCCAAGGTTCTAGAACTCCATGCAATGACCCACCCTCCCCTTTTGAAGATTCCTCTTGTACAGACTCCAATTTTTGTGATCTTACAGCTCCCAGTTTCAGATAGCGCTGCAGCTGATCAACCAGCCCCGTGTAAATAAGCATTGGCTGCACAACTGTAAAGAGCTGGTCTTTGTCTAGCACACCAACTTGTGAATTGTCCTCCAAAGATCTTGAATCTGGGGAGGAAATCGAGATCTCTGCAGAGGAGCGACTCAAAGACACGGCTGGAGAAATTGGAGATCCTGCTAGCGCCGCACGTCCATGCTTGAACTGCATGTATGCATGATAAACACCTCTCTGCAAAAATAACCGCCGATGCTGCTGCCAATCATCCAAAGACTCCAGAAACAATGATTGGACCATCATGAACTGCACTGTTTCATCAACGGCCCCGAGCCTTTGAGGACTACTTCCACTCGGGGTTTTAGATCCTGATGGAGAAGACTCAGGTGGAGATGGAGCATTTAAGTAGGTAGCTAATGCCTTGGACTGAAGACGCTTCTGGCTTACACCTCCCTGATCAAATAAGTGACAAGCCATTTGCAGCATGAAAGGCAACAATCGAGAATTGCTCTCTTTACCACCTCCCTTGCTATCCGTGCTGAACGATGCTCCTGTTGCAAAACGAGCCAGCATCAGCACTATATCATATGTCAGCAATCGCAAGCGGCTACCATCAGCTCGTCCCAAGGCATTCAAATTGTCCCAATATTGATCGACACAACGTGCAAACTGTGCAAGAGGCACAGAGGGACCTCGCAGTGGAAGCAGGTTGTTGCAGAGAGTTTCATTGTTGCGAAGAGCTGCACCCTCCCATTCCTTTTTGGGATTTTTTAAAGATGCATCAGCTCTTTTTGCTTCTAGATGGCATTGAAAATGGATGACATTGAAGTGGCTCACAGTTGTGTAGACCCACTCAGCACGTGTATTATTATTAGTGCCAATACCCAAGTTTACACGTTTGCTGTAGCAATATGTGCCCAACATGTCAGTAGGACATAAACTATAGCCTTCTCTGCAAACCATGCATGCTAAACCTGCTTCTTCCTCTCGCACATCATCCAGACCTTCTATAGATGGAAGGGAGATAACAATGCGTTCACCTCCTGAAGTCATTTCGCGCCTCATTCCCAACCCCTGAAGGAGTTCCTCTCTCTTCTGCAAAGCTCGCTTCCGCATCTCATCACGAGTTGCATCACGCAACCTCATGACCTCCTCTAGCAAAAATCCGTCACCCTTACGTTCTTTATCAGCTAGTGTATCCATAAGATTCTCTGCTCTTGCCCCTATCTCGCTTTCCCCGGAAACACCTTCGAGAGCATGAAGAAGGGGTAGAACACCTCCCTCGTTTAGACACTTCTGAGTTGCAAAATGCCCACTGGAGAGACCCTTTAATATCAAAAGTATGATAGGGACTGATGGTAACTCCAAGCCCTGGGCCCAATCCATAGTTGCTTTATAATCCCCAGAAGTATCAAATATAGCAAATGCTCTTTTAAGATGAAGTATGCATTCTGTTGTGATTCCTTTCTGCATGATAACCCCTTTGAGCTTTTCCCCTTGGGCATCATGCTTGATGGACTCGGTGACTTTGCAGAAGTTCTCAAGCGCTAACTGGTGCTCTGTTGCTTGTTGTGCAAGCCTTTCATCGCTTGCTTTCTCATTATGTTTTTTCATGAGCTGGTCAAACCCACTCCAGTCATGGAGATAAGGGTCAAAGTGTTTTACAAGAAGCTCCATTGCTGCTTGTTCTCCATAAGTTAGGTAAGGGAGGATGCGAGCAACCATGTCATTATTACGTTGTTGCTTACTTGACTTCTTTGAGCAATGTGAATGAGATAATCGCTCCAAAAACATTTGCACAACATGGGCAGCCTGGCTCCCAGCACCATCTGGAACCTTTGAGGCACTCAAAGCACTCTTTGCTATTCCAATGTCACTCTCATTTGCCTCTGTTACAAGGCACTCAACAATAAGCAATAGATGTTCGGCTGATTCGGTGGCCTCGACAGCAAAAGCCCGTCGTGCAGTATCAATTAAAACACCCAATGCACCCAAGCTCAGTAGAGCCAGCCGATTATCCCGTATCTTGCAGCAATACATGAGCAACTTCAACACTAATGTCAACTCTTCCTGGTTAGATTTTATTTCATCATCAGTCAGAGCCTGAACCATATTCAAAACGACTTCCAGACCATCACAATCTCTCATTACTCCAGCAATTGCGAACTCTACTTCTGGATCCTGCGTCTCCTCTCTATCATCCTCCAGCTCTTTAATCATTGGTTCAGTAGCTTCCCCATCTAATCCCTGTAGCCTGTAGGTGACAGTCATGGGTGGACACTCTCTCCCAGCTGAATTCCCTGCAGCAGAACCCCCTGCACCTGTGCCAGAGCCTGATAGCTGATTTTGAGTTTTTTTCCAAACCTGCTCATATACTTGAGCCACACTAAGATCCAAAGAAATAATGCTGCCGGCAACGAGCAATTCCATCCCATAATCATCCTCGATCAACCCAAGCAGATCCAGTTGATGACAGATTTTGTTCTTCACGTCACGCATAAGAGGGCCAACCTCTAAGCTAGAGTAAGGATTCTTGGTCATTGATCCTCGGATAAATTCTTCTTGAGTATGAGCCTTGTTCAACACCATCATATATGCAGGCTCAGGCTTCATTGGGCATATTATATTACATAGAAGCTCCAGAATATACACTACAGTGCGGTCCTTCTTTAGCCTTGCATGAGTTTGAAGACCAGCTATACAAGCTCGAATAAAGTGTCGCTTGTTCTCAAAGCTCTCCTCGAGTAAACCATCTAACAGATCCCTTAAAAGACGGCTACAGTCACCAATTAGCTTGGTTTTTTGCACCACAAGGCCTCGAACAACAAGAAGAGCCTCTAGAACTTCAGAAAGAAGCCCATCCTTCATAAACCGAACACGAATGTTAGGAACTTGTAAGAATTTGCCTAGTAGCTCAATAAGTTTATGGAGAATGTAACCCTGTGAAATGTCTACATGGAAAGTATGTTCTTGAGCTTCTATTCGACTCACTTCCTCAGTAATAAGTTTGCAGAGAGTTTGAAGAAAACCACGAACTGTCAAGAAAAGCCGAGCATCTTCAGATTCTATCATTTTGTAAAGTAGCTCAAAGTACTCACAAGCACTTTCACCGACTGCTCTTGTCGCAGGCAACAAGGCCATCAACAAATTCAAAAACTTTGACCGCCTTGAAGGACTCTGCAAGCAAAGCACCTCTATAAGCCCACACATTTCAACTCGAATTGCCTGAGAGCAAGCACTCAAGGCAAGTTCGCAAACCCACGAGCTTTCCTCAAATACTGAAAGCTCATTTTTCAGAGATAGCTTGCAAGCCCGTCTCTTCCATCTAAGCATGTACTTCAATGCCAAAAACTCCATGCGCTTTGGGTCTCTTCTTGCTTTTGGCATAGAAGGCCTTGTGCTCTGCGATGCAATGTACTGCCTTCGTACAAAATCCACATATGCAGCACCATCTTTCCATTCTCCATAGCTAACAAGGGGCACATCCTGCCCTCTTCTTTCTTGGTCATTATCCTTTTCAAAAGAACCTAATTGGGCCTTAGGAGCAGGTGAACTGTTTGCCCTGTGCATTGTGGAAGCTGCAGTATCAGTCTCATCAGTTCTGCCCTCTGACTTCTGTCCAGATGACGAATTTTCGCTTTCAGTAGGAGCCTCTGCTTTGGGAGGTGTGCAAGCCTGTGATATGATTCTTAAGCAAGGAAGGATGATATGCTCTGAGATTACTGGATGCCGAGCCCCAACCTGAATAGAGGTGAAAAGCAACTGAAAAACTACACGTAGCCGGGACTCCCAGAATTCATCAACCAAAGCACAGGTCTCAGAGAGAAGGTTCAACTCCTCCCGCACGCAAGTTGCAATGTCAATAGATCGATGATGATCCAGACAGTAGATAGCTTTTTGCTTTATCAAGTTATTAAGCTGCCCCACTGCTGCAACATCTCCCTCTGTGAAGGCACACAGAACAGACCTAGCCTGTATACGGGCCATCTTAGAACCCTGATGGATGTTATTCTCAAAAAGTTCAGACAAAATACCTGCTGATACTAGCTGCTGTCTACACTGTGGTATCTTTGCAAGGACTTGCAGCCACTCCAGACAATACGCAACAAAAGTGTTTGCACAGCCATAACAACGGTTGCACGGTCTTGAAGGTGCCAGCTTAGATTCTGTCTGCCCTGTACTAGGAGACCTTTTCTGTTCTAGGTAAGATGTCAAGACACGTCTAAGCCCTTGCAAATTCTGGACACTTCTACTGACTGAATCAAATGCCATTTTACATTTCTCCCCGTACAAAACCCCCAAAATAGCTATTTTCCTGTTTATTTTGAATGATGATGATCCTGGTAGGGACACAATCATCTGCTGAACGGAATCCTTTTGCTGAGAATCCATCTCTGTCTCACCAATACTAGATACCAGTTTTAACAGAGGTTTCTTGAAACCAAGCAACTGCTGGTACCTCTTATGAGCATTTTCTGATTCCAACTCAATAGCAGCAAGACCTTTCTTCATGTCTTCGTCATTCTCCATGCTCTCAAAATGAAAGCTAGGTTTTGCCATGAAATTGAACTCAAATCGACCATACTTGCTATAGCCACACTCATTACACAGAAAGGAATCCAGGTTTTCATAATTAATGTTTCTACACTGCCTGCATTGATAAGCATTCTCATGACAATTTCCACAGATTCCATGTTTGTCTGTAACATAACGACTGCAGCGAGGACACTGCAATGACTCCAAAGATGATGCTTGAAGGTTCTCATAGAATGAATCCAGCTCAATCATGAAATTGCAGGCAGTAATAGGGATAGAAAACTCAACCTTCAATTCTGTTTGACTGAAAGCAAGATAGCAGCTCTTTGCTCTCTTCCACAATGAACAGTTGTTCTTGAGCTCTGACAAATCAGTGACTGGCTTGTTATTATAATAAAGATTGAGTACTTTCACTGACTTTGAACGGCGGGCATCATGCACATTCATTGTTACACTCTGTATGGTATGACTACCAATGCACTTTACAAGAATGCGATTATCAGTAAATTTAGTCTCTGACTTCAAACTGTCAAGCTTCATTCGAGCATAAGGAACTTCTGGGCAGCTACAGGCCAAACAAGGTTCACTTTCCAGGTAGTATCCATCAAAGTCTACCAGGCTGCTGAGTGTATTGTATATTCTGGAATTAGGATGATTTGCAAGAAGCTCGTTTTGAGAGCAAAGAGTATCAAAAAACACTTTCACTGTATCGCTAGTTAGACAAGACTGAACAACAGCATTTTCTTGACTGCTAAAACCTGACCCTTGGATCCCTTTGCCCAGGATCCACGTGAGAAGATCTGTATACTCACCAATATTCTGCCCGAAAGAAGGGAGAATGGGAACTTTTTCCAGTAACTTCTTAAGCAGCAGTTCTCGAACACTAGATCTTCCATGATGCCAAGCACCAGTTAAGACAGCTTTGGCCTCTGCTCGTACAGATGCAGCATTCCATTCAAGTAAAAAAGCATCAATAAAGTGCAATAAGACATTTCCATCCTCAGCAAGCAGCAGCTCCACTGCAAGCTCCATGTCCATGAAAGTCTTTTCTGCTGAGGAATCGGTAGAATCCTCACTAGAACCTCTTTTCTTTTTCCGGGTATCAGTGCTCTGCTTTGTTCCACTGTCTCCTGTAGCATTGGTTGATTCTGCAGTCTCTCCTTTGTTGGCAGAAGACGCGCCAGATTCCTTCCCAGCGTAAAATGCTAAAGTGAGGAGCTTCAATGACTGTACCACGGACTCCTCCCCAAATGCAAAGACCCCATTCAAGAGGAACTGCAAAATGTCCGGATGCCTTGAGCAATACTTCTGCCAGTTTCGAGGTCTTGCCGCAGCTACCTCCACAATGGCTGACAAGCATTTTACAAGCTTCACACTTCTTTCATACACTAAACGAGAATGCAACCCACCTGCCTTTTGTACAAGTTTAAAGAGTTTTCGAACCTCTCTTGAGAGCTGCCAAGCATCCCTCACATTGTAATAATGCCCCTTTGATCCACAAAAATGTAGCAATAGCCTGCGGGCAAACCTCCTAATTGTCGTAGTGTGGGGATTGTTGATAAATGAACACAGCACTTCCTGCCAGCCCTCTAACTTGAGATCTGGAGTTGCCCATGATTTGCTACTCACTTGATCCTTGTCACTTGTTTTTTCAGGCCGAACCAAATTGTAAGCCAGCCGAAAAGTACTTTCTAATAAGAGCCTGTGAAACTCTCCAAAGAGATCATTCCGGTGAGCTTTGGCATAAGAGTCTGTGAAAAAAGGAGCAAAATTTCCAGCTGCAAACTCTTTTCTAACTGTCAATAAGGCACCACACACCGGACCTGTTGAGCTAACTGGACCTGATTCTAGGCTCCTTGACGAGCTTTTGAAGATCTGCCCTAACTGCTGAATGATACAGAGAAGGTAGTTCATTAGCTGTTGCTGCCTAAGCGCAGCACAAGCTCTGTCAAGCTGGGAGCCTGAATCTCCCTTGATTTGACCCTCATCTGAAGATGGTGAGCCGGTCCCTGATGATGACGGCATCACTACCACTTCCCCAACCCTTGCTGCAGACTTCTGTACCGGATGATCAGAACCAGGCTGGTGCCAATTCCGCAACATCAGGTTAAAAAATGTGAAAACAAGGACAATCACCTCTCCAAAATTTGATCTTGTCTTGATTGACAAGGGTTCACCTAGGTTCATCTCATCCATTAGCAACTTGACAAACATCTCCAAGTTTATGCTCTCTGTTCCTGATGATTCAATAAAAGGACTTGTGCATGCTGAGGCTAATCGATAAAAAAACTGCATGAGGGGTAGTGCTTGAGCGCCAGAAGTTTGTTTCATCCATCCTTTACTCTCATCTACCAAACTTTTGAGAAGCAAAGAATTAAGGGCCCTCTTTGAGGCAGATATTGTTGTGCCTTTGGATTCAACCGATGTGATAAAAATTTCATCCCTGCTCTCGACAACATCTAATGAAGAGCTCATAGGGGCAGAAGCAGATTGCATGCTTAAAGCAGTAGCCACTTGCAAGAGATTTTCATCACTGAGATCCTCGATAGACGCAAAACGGATGTCACCAACCTCTCCACCTACATTGTTGTCAATATCAATCGGAATGGCTGACATGGGATGATCCCTGGAATGAGGGGGTGGAAGCCTGTCTCCATCCATGACTTCATAACAAGCTTCACAGAGATCAAAATCTGGGCAAATGTTGCAGTGCCACCGACGCCCAACAATTGGAACTGTTGAACAGCCATCACAGCAATACTGCACAGATGCATTTCCACTATCCTCTTCCATCATTACCTGGCCATCAGGTCCCCCTGCAGCTGGACCACTTTCTGATGGCAATGACATTGATCTAGAATTATCTCCAGCATCATCGTTAGCCAGAATTGTTTGCTTCGGAAAGGGTACTTGAAGCAACCTGGAGGACATTGCCAAACTGCCTGATGCTCGGACTATCTCATGAGGTGCAAACAGCAATTTCTTGAATATAGCAACAGCAGGGGCCACAGATATTGAAGTTCCTAATCCATTGCTAGCACGAAGCGCTAGACACTCTGCATAACCATAGATAAGATCCACAGAAGGTATTATCAGGTTATTCACTGTCTCTGCATCGGGTTGTTCTGCAGTAAGCAGCTCCCACAGCACCTTCATCAAGTCTTCTATAACTGACGGACCATGGCACTCAAGGAAGCAAGCAAAATTTGACCTCCTATGCAAAGCAATCTTACAAACAGCCCGCATTTGAGCTGTGAACTCCTGGATCACCAGTGGTAATGTAGATCCACCAAGTCCCATTTTTGATGCAAGCAGTGGGCACACACGGGAAACTCCTGTAAGCCGTAGGGTATCCTTGGCCTGATAAAAAGCATCCTTCACAGGATAAAGTGCACGAAGCACACGCCTAGCAGCTGCCTGTAAAAGTGGCTGCCTATCGCTTTCAAATACAAGCTCAAGCAATGGCTTGCACCTTTTGCGACTGACTTCTAAACTTACTCCATCCACTTCTGACATTGGTTTTGTTCTGAAGGACAGGTAATAGCCACAAAGAAGTCTAAAGCAGTCAGCCACAACCTGCTCTTCTGAAGAAGCATTCTTCATCAGCTTCAACTTGCTTCTATTTACCATAGATCCAGACACAGATGCTTGAGTTTCCATGTCTAACACAGCCTCTAGCTTTTCCTTCCATCCAAAATCATCCTTAGGTCTTCCATAGACTTCAAGATTGTCAATCCTTGGTAATGAGAAACCTCCAAAAGTTGGGCCTACAGTAAGTGTGAACTCTTCATCTGCTAATAAAGCTTCTGCATTGGTAAATGGCAAATCATACCAGCAGCGGACCCCTTCTTCCAGCTTGACAGCCCTCTGAAATATGCGTAGTTCTGAAGGAATGTGGCTAGTACTAGAGTTTCCAACATGCACTCGGCAGCCTACCATGACTATGTCTGCATTTGAATTGTAGATAGTAATCTTAAAACCCGTCGGACTTGGCCCCTCCAAAAAGCCGTCATCGGAGGCTAAGCTCTGCTTTGCCCCTTCAGAGTCCAGATTTCGTAAGACATCACCACCCAACCTGATTTCATTTGTGATGCAACTAGTCTTCTCAAAAAAATCCAACGGAAAAACAGGTGCAGGTGAATTGCTTGCCCTGCTACCAAAAATTGCATCACCCAGCTTCTTCACCTGCTCAGCCTCCAAGATTGAAGTTTTTGAAGATTCAACACCAGATTCATTTCCATGTCCATGAGTGAAGACCTGGAGACTTCCATCATCATGCAAAATCAAAAGGTCATGTTTGTCTTTCAGAGGAGATTTGTATGCAGCAATTCCATCCACTCGTGGACATCCCAAGTTCCCTGTGACCCTTAAATACTGGGCTTGTATCTCAGATGACCCAAAAGAAACAGCCAAAGCCGAGTTGGCTCTCTGGCTGTTGAGGGAAACAAATAAACCTCGACCTACATCAAGCAGTTCCCTCCAATGGTGTAGACCTGCTACACTTTCCTTGCCTTCAAGGTCACTCTCAACAAGACTTGAAACTTCTGAAAATGAGGTTGCTTCCATGTCCAAACGGCCTATCAGTGATACTCCTTCCGAAAATGAAAGAAAAAGAAGCCTCAATGCTGGAGAATAATGCAAAGACACTCCTTTGTTAGCTTGATACCTTTCTGGAATCAAAATATTGTCAGTGAGAACAGAAGCCCCTAGATCAGCCCCTGCAGCAATACAATGCCTGTAAAGAATTCCTGAATAAGAGAGAACAACCAGCATGCATTGTCCTTGACCCATCGGTATGAGCGAAGCATCCACAATGTGGTCTTCAAGAATCGTGAAGTAATGAACTGGGCTGATACTATCTTGCGACAGATCATAAATTTTCACAAACTTGCTTGTGACAACCATTAGTTGCACCTGTGATCCAGAAACCCAAACTATACGGCAAATATAAGTATCTTGGAGGGCAAGCTCCACTGCTAGGCGATCAGTCACTTCCCCTCTGGAATTGATTGTGAATATTTGACAGTCTTCATACCCAGCAACAGCCAAGTAGCTTTCATTAACGCTATTGAAGACAAGATGAACAAGCTCAAACCGGACAGAGTTTTTCGACAGTGGCTTTACAGTTGTTTTGTCCACTGTCACAGGTGCACTAGATGGTGGCCCAATTACTTGTTCAACATCAAAAATAGTCACTTTATCCCCTTCACCAGCAGCCAACTTGCCTCTACTATTTGTGGAAAGAACAGATTTAAACAGGGTTCCATTCACAAGGTGAGATTTCAACTCTTTTGCATTAACATATTCAGCTTTAATTTTCATATCAAATGAGCCATTTTTGTAAAACCTTTTCAAATGCATGAAGTCACCCCTCAGACTCAACCTTTTGTCATCACCTAGACCTATTTCATCCTCAATATTAGGCATGGAGCACTTTATCCAGTTAAAATTATTCAGAAGCCTCTCACACAGAGACAGTACCTGCCCTTCCACATCCAACTCCGAAAAAACTGACAAAAGCTGGCTCTCTTCACCTTCATTGACTGACACCTTGCATAATTTCTCATTGTCAACCCATACGTCATCCTCCAGGTCTGAATCACTCTCAGATGGAGGCGGCTCTTGATCTGCAGAAGAGACAATAGAGGAAGGAGAGACATACTTTCGAGGTTTCAGGCAAAGACAACTTTGTCCTCTCACACCACCTGCCCCACAATCACAAAAGAACCTGCTAAGCCGAGAATATACCACCTTGTGCCCACGATGGCAAACTTTAGCACAAACAGAGCAGCATCCTTTTGACACTGTCAAGTCACAAGTGTAGCAAAAGTACCAATGTTGCTCCATGAAATTATTTCCACTGGATGTAAATGTGCAAACCCTTGATGCAAGAGTTTTTTCGCTGTTGCTTCCATCATCCTCTTCATCTTTATCCAGACTAGTTATTTCTCCATCAGAAGTTCCATCATCTTCATCCTCATCCACAGATACAGCATCACAATCAGCACCATGCCCACTTTGCTCCATGATAGTATGAGTGACCTCGAGAGTTTTCTTAGGCACTAAAGGTTTGCCTTTGTTGGCAGATTGAAGCGGACGGACACCAGTATTGAGCAAAGTCCTTCCTTCAGTTACTTTGGCTAAAATCTGTGCACGATGGCTGCCACTTAAATTCAAAAGAGAGATCAGAAATGCAAGAAGTGCTTTCAAACCTTCCATCTGACCATTTTGACCTGGCAATTTCCCCACTAGCTGAATTACAGACCAGAGTACATGTCTTATGTGTGATTCCTTGTTAGCTAACTGCAGCAAGAGGGAAAAATAAGACCTCCGGCCTCCATTATCCGAGGCGTTAAAAGCTTGGTCTAAGCTTAGAAGTAATGCATTTAAAAGATGCGAACGGAGATCTTTTCCATCAAATGTAAACTCGGAAGAAACAAGCCCATTCAGAAAACCTACCAAAACATCTCTTATACCACCAGAAGACACCGGCAAAATTCTCTGCTCCAACCACAAGCAAAGAGCCTTACAATCAGTTTTAATGAGCTTTTCCTGCAAATCAGACCTCAAGCCACCATGTGGCATGTCACCTCCAACCACATTTGTCAAAAACTGAAGCACCTTCACATTGACTGGCTCTTGATAGCACCCATCAAGAACATCCACGAGAAATGACAAGCGGCCCCCACCAGAAGTAAAATACTCTCTGAACACATCACATCTAGCTGGGTCTGAATAGATACTGTTGAAGACCTCAACTACATGAAGAATCAGCTCTTCTCGAATTGCATCACTTATCTCACTATTACATGAGAGTGCCTTCAGTAGTGACTCTTTCTGCTTGATCAGATGTAAATCACAGCGTTGAGCTCGCTCTTCTTTTGAAGGAATTAAAACACAAAGGACCTCTTCACATTTGAAGTGTACCGTTTCAAAAATCTCTTCTAGCTTGATCACCATAAGAACATCTAGGAGGCCTTTGACAAAAGCATTCTGTGCCAGCCCATCACAAGCTTTCAAAACATAACTGATAGTCTCCAGAATGCACTCAATCAGACACATGCAAGACATAACCATGGCACTAGCAGGATGATAGCTGCAGGGGTAGCCATGCAGCAAAGAGGGAAGAAAAATCTTTTCAACAGCGCTTAGATTCCCTGCCACAGCATATTTGGATAGTATTTCTGCATGCCAGGATGTGGGCATTCCACGTCTTAATAAAGTATGCAAAGGAGAGAAGCTAACTCCAAGCTTAGTGAACAACTGATCCTGCTTGGCCCAGCTGAGACCTCCTCTCAAAACTAAATGTATTGAGGAAGAAGTCTGATTATCACAGAGGATATCTACCACACTATCGTGAAAAGACTTTACACTGAAAGAGAGCGAGGACAACAAGGTCCTGGACAATTCTTCTAAAGAGCCACTGCTTATACAGTCGCAAACAAGCTGCTTACAAAACAGTGGTAACTCCTCATGCTCAGGCTCTGCTGAGGTATCAGCAAGATAAACTTCAAAGCCTTTCTGTAGAAAAGAAAGGAGTAAGTTGAGCATTGAACCCTGCCTTACCCTGTCAATCAGTGAAAATTTTGTTGGGCTATCCCTCAAACAAGCAGCTTCATAAGTAGACAGAGCGATCTTAAAAAATTTCCACCAGTCTGCACAATTCCCTTCAGTCCCCTTGTTTTGACTCCGGTTGACGTGGCTAAACAAACTTTGTGTTAGTCGCAAAATTAGATCCACGCCACACATATCGCCATTAAAATGACTATAGTCAGAAGGCATGCACCATTTGGACTGTCTACCAAAGCCGCGAACAATAGTCCACCCTAAGAAGAATGTATATCTCTCCACCAAAAGTTCTTCCACTTGAGTCACTGGTTTGCTCCTCCACCTACCTAAGAAACTCCTGATACTGTTGCAAACGTCCGATATTTCTTGCAGTGACTCAAACAATTCAGTCAAATCTCCATCATCTTGGCAAAATGCATTAATGTCATACAACTGAGCCAGAAAACCCTCACTTAGACTAGTTTGTCCACAGGCCGGACCTGCCTCTTTCAAGCCCTGACCTGCAATAGCTGCCATGGATGCGGGTGAAAATCCAGCTACTGCAACATGTGCACTATTTTCCTCAGTGAAGTGGCTTAAATTAACTTTCAAGTCAATAATAAGCCAACTGGGAAATGCCTTGTAATGCACACACATATATCTGAAGATCATAATCAATCTTGAAAAAAGCAAGGAGCAAGATGACAGAAAATTCCCCTCCAAATTCTGTGAGTTTTCACTGAACTCTTTAACAAGAAATTTAACATCTCTTATTATGGACAAGCGGGCGGAAGCACTACTAGAATGAAAAGCCATCAAAAGGACCTCCAGGAGAAAAATTGAAGGGAGGCTCGCAGTAGCTTCTGTTACAGGAATATCCATCCAATCACACTTCTGTATGCTGCTTGCCAATCTATCTCTAAAGCTTCTCCAAACTGCCAATGTTAGCGAATCATGTTGCAGCCCACCTTGCACTGAAGCATGATGGATTAATACTTTAGCCAAAAGCGCTGAGGTCTTACTTGCCATGGTGCACCCTACATAGCCCTTCTCTAAAATTTTCACTAGGAAATGCTCCTCTAGCTGGAAGGACAGATTTCCATTCATCAAGATTGATTTCATAAGGTCAAAGCTGACCTTGCTGAGCTGTATCATCATATCCGAATTACATTGAGCATCGACCTTCTCATTTGAACTGTGAAAAAATATTTCTAGTAGTAGATCAATGCCCTCTGCATTCATAAGTTCCTGCTCTGCTTGAAAACTACTTGTTTGACAGCCCGGACAAAAGATGCAGTCCCTCAGAAAAATCAGAACATCGATTACCGCCTGCAAAAGTGTGTCATGAAAGATACATGTTCTATTGTCTACATTCGACTGTGCATTAGAATCATTACTCGATGTCTGCCTGTTTAATTCTGAAAACAAGTTCCCAAATAAGGCCTCGTCTTCACAGATTGCAAATGGGACTTCTGATGAGTTTCCAACATTACTCTCTTTCCTGTAAAGTGAAGCCTTCTCCCTTGCAGGACTCGCTTCCGTACCTATAGAATAAAGCTGTCCGATAGCTTTCAACAGATCACCCAGCCAAGATCCATCTTCTGGAAAAACTATTTGCATCATCTCACTCTGACTTCTCTCAGCTGTAAGATCAAACTCCTGTGATCTGAGTTTCAGTGCAGGAGCCTGGAAGCAGATGCGAGCACGTCCGTGTTTTCTTATATGAATAACCGCATTGCCGTGAGCATGCATGGTCCTTATGAGACCAGAAATGTAAGATAAAACTTGAGGTTCAAGTACAGCAGGTAGTTTTTGTTGTGAGTAGCCTTTGCCTCCCTTTGATCTGACTGAGACTAGTACATCAAGGGCTGAAGCAGCCATAAATAATCTAAGGTTCTGGGTTACACAATTGCCAAAACCCACAGCCTCAGCAAGAGCAACGACACTGCTGATGAATGTTGCATAGCAACAGTTTTGATTATCTGTCTCTTCCAAGTTCAATGAAATCTCCTGCATGAGCAGCTGTGGAGTCCAAGCCACCAACTCAATTAAGCGATTAAGCAAATCCTCTGAATGAGGAAACCCTGAGGCAAACTTTGATAAGGAACACAAAAGCCTTAGCATTCTGGAGATTACAGACAATTGACCCCGCAATTGATTCTCTCTCTCTTCTCCAAAGTTGAAATTAAAATTTGCTAGCAGACCTCCACACACACCCAGAAGCTCCCTGTGGATGGCAGCATGACTAACTGCAAAATGCTGTGAAGCAGATAGCATGTTTGAAAGCTCTGGAAGATATTTTTCCACATCTGGTATTACTAGCTTCAGAGGCTGATCACTGGTTAAGAGAAGCATTATATCTTCCGAAATCTCTGTTTCCTGCTTACCATTAGTGAAGCTGTCCAGACTGCTGCTTTGAGTAAGCTCTTGAAAGGAAACATTAACAGTATCATCTGTTTCCAACCCCTCTAGCAGCTCTTTTGAAAAACTCAAAACTGGTGCACAACCTATTGTTCTTCCTTCATCAACTGCTAGCTCAATAAGATGGAGCAGTTTGTTGTAAATCAGCTCATCTGAGGAGCTGAAGCTTTCCTTGGCCTTTGCTGAGATAGCAAGATTCTTCAAAGCCTTGAGGCATGCCTCAACGGTGCTCCGGAAAATTCCCTCAACAGGCTCTGTTAAGCCAGGTTCTAGTGAGAGATGCTGGTAATGGAAGATCACAGCTTCCGTGAGGTTGAGGATGAAATCAAACTGCGAGGGGCTCCAGCGACGAAAATGGTGCTGAGAAGCTGTGCTTGTAGAGTCATTAGATTCTGCAGGTTCATGGGTCTGTCCTTCATGTCTTCTTTCCTCCTCCTCTTCTTCATTTCCTTCCTTGTGCTGCTGCAGGTGCGATGGCAGACAAGCGAGGAGAGAGGCAAGGCAACGAAGTGCCTTATTCAGAGAAGGGTCGGCGGCACACTTCGGTGAGGGCAATGGAGATGTGAAGCCTCCATGGCTATGGAAGGCGTCTATCAAGGGCTGCAACTCGGCCATCAAGAAGGCGATCTACACAGAGAACGCATATGGGTAGCGAGCTTCGCGAGCAATCAAGCTATGGCGGCAACGAGGGATTAGACAGAGAGGGAGATAGAGAAGAGGGCGCTGTTCGTGCTTGAACCCGCAAGCAACTTTTCTTGCAGAAGAGGGCGG |
| **AUXIN TRANSPORTER PROTEIN 1 (AUX1)**:  TACAAAGTTAAAACACTTAAGAGATTGCATTTTTGGAGCAAATTTGTACATGGTGGCCTCTTCATGATGGACAACAGATCTTCGTGTGATAATAAATACCTCTGCAGATTATACATTAGGAGACTCTGTATGCAATAGCCATACCTTCAACCTGATGAACCCTGTGGCAGTAAGCCCTCTACTCAAATGGCTTCATGCTTCTCAATAATGGGCATCGCATCGCATGCCTCTGCAAATGATAAATCAAACAATTTATTTGTATGAGCTACAGACAATAAATCCCATGCCTCTACAATCAATGTATACGAGGAGCACTCTCGGGCACGAGTCGATACATCATAAGCCTTATCTGAAACAACACTATCCTTGATGTATATTGTGAGGATGTACTTTGCTTGATGATGGGCACTTGTATGTAATGATGGGCACTTACATGTACTTTGATTGATAATGGGCACTTGTATGTAATGAAGGGCACTTAAATGTATTTTGCTGGCACATGTAATGATGTTACTCTGGTACGGGTGGGCAACAAGCCTCCATAGGTAAAATACATTCTTTGCTTGATGATGGGCACTTATATGTAATGATGTTACTCTGCATATGGATGGATAGGCACCACAAGCCTCCATAGGTGATACAATATAAACCTCGTTGTATGCAATAACTAATCATATTTGACGATGCTACTCTGCTCACAGATGAGCACCACATGCATCCACAATGGATACATTATAAGCCTGTCTAAAATAGCCATACCATCAACATAAGGCTTTTGATGCAATAAGCAACTGTCTATTTGGGTGGCGGTGGTGCAAGTGTGGGAGAGGATGGATGTGGATGAGGGCATTGGTAACACTTGGTGAACAAGCCGAAGGTGTGAATTTGCCGTGCGAAGTTTGTTATGCTGGCCCAGCCCCCCAATCCAAACCCTACAACCAATGTCCACACCACCACAAATGCATTGACAAGGTAGATAGCAGTCCAGCTGCGAAGATAAGTGGGCCCCTTTTCCACTGCATTCTCTCTGGCAAATGCACTTCTGTAGGTTAACATGTGGGCCAATGCTGGTATGATATACACAGTAAATGTAACCAGTAAAGCGCCTACTGCGGAATTGATTGGGCCAAAGAATGGGAAGATGATTGCTAGAAACCATATGGGTAACACCACTGGTAACCGAATCAATGCTCTCAGTAGAATGCTAGCTGTTGTATGTACTCCAAGTACCTTTTCCCATACAAAGTAGAGAGGTGTACACGCGAAACCAAAAGTTATGAATTGGTGAATCAACATCAGCACAATAGCTAAATCACGCGCTCCAGACTTAGGCAGCAATGAGAAAGCATTGGAGTGATCCAAAAGCTGATCTCCAAAAGCCCAATACACAGAAATGGCAGATGGCAGCGTCAATGTCCAGACATACACGGTGGCATATAGATATATGGTCTTAAATTTGCTTGGCTTCCACATAGCATGCATAATCTCCACTGTGACAGCGTGACCACCAAATGTGTAAAGGATATTGGTGGCTCCGGTGAAATAAAGAACTAGCGCACTTGGGCCTGTATGCTTCACATTTGGCACCTGTCCATGTACCAATGATGCAATAGTGAGATACCATGCTGTGTAAGTTGTCATGCCTAGTCCCAGAAACGACCAAACCCTATAATTGTGAAATGATGGAATAAACACCGTGATAGAACAGCATGCCCCGAAGATGTATGTCCAAGTTCGCTTGTCCAAGTGATCATTGATATAGTAGATATTACTGCCGCATGCGATGAGCTGTATGACTGAACCAAAGAGTAAGAATGTGCAGTTGAACCCCAAGCCGATAGCTTTCCAATAAGGCCCAAGTAGACCATCCAAGACTTCAAACCATTGTATAACATGGTTCTTGAAGTTCACATTCTCCTTCTCCTTGCGGGATCTGTACTCCAGGTAAAGCCAGGTTATCAAGTATGCGGTCCAGCTGCCCATGAGACCATAAAATATTTGGAAGACTATGCCTGATGCCATCCCAAGTTGAGAGAAAGAGTAGGGCAGAGTGAGGAGGACTTGAGCCACCTGGTTTGAAGCACAGCTAAACCAAGCATCATAGACAGAGCCACCATGCCAGAAGAGTTTTTTCACTTGGCCTTTGACAGAGTTATCGTTGAGGCCATCTTGCTCTTTGCGGTCGAGCTCCATCTCCGTGTAGTTCACGCCCGACATTGCTCCATCCAGCTCCTTCACAGTGCCCATTCTGCGGAATGGAGTAAGCTCGGCTTTAGCTTATCTATGTAAGCTCGAGACCAACTTAACAGTAATGGAAGCTCGTGCTTATTGTAGAAGAGTTAGATTGGGTCTGTGCTGCAAAACCCAAGAGAGAGTAGTGGAGTGGAAAGCGAGAGAGAGAGAGAGAGA |
| **ATP-BINDING CASSETTE G40 (ABCG40)**:  CGATGATGGGTAACTTAAATTATATTGATGAAGAGTTTAGATTGGACTCTAATACACATTCAACAAAGGCATAATGATGCCAAAATTCAGCTTTAGGCTTGTAATACATGTAATCAGACACCACAAATTATGTATTTGGCCTCATGGGAGGCTAGGTGCAAGTAGCGCAACATCATAATAATTTAGTGTCTTCATGTTTGGTCAAATAAAATGAATTAGGAAGGGATTACTGTATTTTTTTTACACTATGTCACAAGAACAATGGCTCCACCTAAAAAACAAGCTGCTAACTTTGTGTTCAATAAGATAGATTGGATGAGGATTGCGTTGACAACAACTTGTAGATGGAAAAGTGGGAAAAGAATTTAGTACCGAGCAAGAGCTTGCTTTAAAAGGAAAATTTTGTAATGATAGTGTGTTTCAATTTTGGAAGCTATTTTTGCTATGTAATTTTGGGTCTAGTATGGACAGTGTATTTTGGCCATCTAGAACTCAAATACCTAGTGTTGGTGTCTCCAGCAGTGTGCGGGAAAGGTCTGCCTCAGCGCCGGTTGGAAATACCGATTAGCCGGTTTGAAAAAAATCCGGCAAATTTTCTTTGTATTTCCGGGTTGAATCTTTGGCAAATCCGGGTTGAATCACACTGGTCTCCAGAGAGAGAGATAAATCCTTCTGGATAGCACATACTCATCGTTTTTGGAAGTTGAGCTTCACGATGGCAATGGAGAAGACGAAGGCGAAGAGCAGGACAATGCCGATGTGGGCGCCCACGACCGCACCCAGGAAGTCGTGCTTGATACCAAACGCTTGGTTCAGGAACTGTTTCACGGGCATGCTTCCCGCATCAGGATCCACCACATTGCTCTCCACGTCCCCTAGCTGTGACCCTATCAACCCATACACCGTCCACGCCAGTGGATCGGCCCAGTAGAACCACCTCCACCACACCGGTATGCTCTGCATTTCCCAGCACATCATGTTATGTTGATACACACGCACACGCACAATGTGTATGTGTGCATTCAGTTTAACATTCACACATACATCCATTCTTTTATTGATACAACGTCTATGCATGAAATTCAAGTATTCTCTGTGTGTTCATAACAAGTACTGCTTACACACATGATTTGTGCATATACCCTCAATTTTTAGCAGTTCAGAATGCTTACCACTCGAGGGATCATGAAGCCAGAGAACAGACTCTGGAGGCTTAAGAAGCCTGCTGTGATTATAGTCGAAAAGTACACGTTGGGGGTAATTGCTACAGTCATCAGGCCAAAGTATGTGAAGAAGAGAATGCAGCAGAAGGTGAAGTAAAGGAAGTAGAAAAACTTGGCTGCCGTCCAATGGAAGTTGATCAGTGTGTACACAAGCACCGTGTAAAGCACACTTTGTGCAAGATTATAAGGAATCTCAATACCCACCTGCAAGTGCAATCAATAGTTCAGTATTTCATGGTATGCTATGTTTTATTGCTTGTGATCATCCACAATCAAAGTGCCTTAGCAGCACCACCTGAGCGAGAGCGTATGATAGTGCAGAGTACATCCTTGCTCCCCTCTCACGATAGAAGACAGTTCGTTCGACCGAAGCAACTGGCTGGACAGTGTTTGAGTTTTGGAACCCAAGAAACAATACTGATGCATAGATGGCACCGAAGATGTTGTACAACTGTGTGGTTGTCTCTCTGCGAGGGCCCAAAGTAAGTTATAAAGATTGGGAGCTTTTTATCTATAAGAGCAAGAGAACTATTTGATTGCAAAAAGCCTTACGTTTTTTGACCTAGTCTCCAGAAAACGGTTCCCAAACTAAGTGCAACAGAAATTGTGAAAAAGAATCGCACAACATTGTAGAAAGGATTGCGCCAGTAAGATTTGTGTTGTTTCCAAAGGCATGCCATGCATTGCTCCCAAAAGGTTTGTGGATATTGGCTTGGGAAATAAAGGTCCTTGGAACCAGGAAGGGGATTACTTAGCTCTCCGATCAGTTCTTGATTGCGCTGGTAGAGAGCAGATTCTTTGTAAATCTGTGCAAAGTCAACTTGAAGGCGAGCCTCAGCTGAAGGCGAGCTGATTTCAAGCATCCATGTAGCTGGGTTGTATCCGTCGTTGATGGGTTGAACCCCTGGTATTGCCTCAAAATATTGTACGAGTTTGTTAGAGGAAGTACCAAGAGGACCTGCATAGATCACTCGCCCACCTCGCTTCAACAGTAGTAGCTCATCAAATGATTCAAATATGTCGATACTTGGTTGGTGAATGGTGCAAACCACTGTCCGCCCAGTGTCAACGGTGTTACGCACGGTTCTCATGACTATAGCAGCAGCTCGTGCATCCAACCCTGATGTAGGCTCATCCATAAAAATTATGGAAGGGTTTGCTACCAGCTCAACGGCAATAGTAAGTCTTTTTCGCTGCTCCGTTGAAAGTCCATTGATTCCAGGAAGACCTACTAATGCATCTCCAATAGGGGTGAGCTCAACAAGCTCCATGATCTCAGTAACAAACATCATTTTTTTTTGCTTGTCTATGTCTTGTGGGAGGCGAAGCCATGCCGAATATTCTAGGGACTCCCTTACGGTTACATTGGGGGAGTGAATATCATTTTGTTCACAGTATCCGGCAATTCTCGCAAACGTTTCGTGTTGCTTGGGGTACCCAGAGATGCTTATATCACCCTCAATGTATCCTCCTGTCTTTCTTCCAGCTAATACATCCATAAGAGTTGACTTCCCTGCACCACTCACACCCACTAGAGCTGTAAGAACTCTTGGCCGGAACGCCCCACTAACATCGTGGAGCAATTGAAGCCTGTCTTCGGCAACCCCCTGCTGCTTCATTTCTGCGGGCATGTCAACA |
| **ATP-BINDING CASSETTE D1 (ABCD1):**  AAGACATGAAGTGATGGTATATTTATTATAGCATGTTGTTTCAAAGAATTGATATACATCAAATTTACAGGTGAAAGGTCTCTACTACAACCTCCACTTTGGAGGGTTACCCTGACAGATCTATTTGCAGCTCTGGAAGCCCATATAAATTGAGGATACATGGAGAAACTATTAGTAAATGTATGGCCTATAGGGTTTCCGTTCTGCATTGCCCATCCGATTACCTGGTGAATGCAATGCCATTTGGTTTGTTGTCAAAACAGTTGGCTGCCCCCCGTTTTGATGCACCAAAGTTTCCAACCACCTTCGAAGATCAATAGCCCCCTCAGTTCTCTTCATGTTTAATGGAGCCAAGTTCCCAGCCACCTTCCCCATCAACCAGTTTCAACTCCATGGAGTGAAAAGGGATTAGTGCAGGACGTTGAGAAATTGTGACAACTGTTATTCCCATACTGCTTGCAAGCTTGTAGAGATGTTCTTCCACATCCACACTTGTTGCACTTCATTGCAGAATGGAAGTCAGAAATCCATGAGCCAAATAACTGCTAATTGCCAGAAAATTTATGCATACAATCACTATTTAATACTTGGTACATTCATCCAAAATACCATACTTGGGCTGATGGAAGAAAAGCCGAGCCATGCCAAGTCGTTGCTGCTCTCCTAAGGAAAGCATATCCTCCCAGTTGACAGTGGTATCCCATCCTCCTTCACGCTCAAGCAAGTAAACAAGTCGAACATCTTGCAAGGTTGTTAGCAGCCTCCTATCAAGTAACTGCAAGGCTTGTTCTCTATCACCTTCTCTGTATGCATGTGAAACCTTTGCAAGGGCCTCATCTAAAGTTAATGGATAGATAATCTGGTCTCTAAGTGTCCCCAATGCTGTGTATGGATGCTGCGGTACGTAAAAAATTTCTCGGCTGAGACCCGTTTTGTGATAATTGTGAACAGAGGTACTAGGCTTTGCAATAGTGCCACTTGCAATTGGCCATAATCCACCAAGCACCCGAAATAAAGAACTTTTTCCAGCACCGTTTGGACCTGTGACCAGTAAGCTTTTGTTGGGTGAAACAACAAAAGTCAATTTCCTTGCAAGTAGCTTCTGTGCAGGTGTTATGATATCCACTTCTGAGAAAGCAATGTTATCACTACTCTCTGAGTTGCTCAAAGCAACGGCATTTTGTGAAGGGGTTTTTGGTTCTTGCTGAGCCGCATGTAGCAGCTCATCTAACTCGGAAATTCTGGCTATGCCACCTGACAGTTCGAGAAATTTTCTGTAAAGTTCTAAGAGATCCCCAAATGCAAGAAAGCTCTGAGAAACAACTGAGGCTAGGAACCTCAACGCATGTGCCAATTCCCCTTGAATGACAGTAGAAGCACGGTCCCCTGAATTATCCATGGCATACAAAAGACTCAAACCCCATGTCACATTGTGCGGAAGCTGTTTGGTAATAAACTCATCAGCAATCCCAAATATCCATCTCCTCTTCAGAAGCTTTTTGGAATGCTCTAGCAGAGCAGTAAACCGTGCTTCAATCATTGCTTGTTCTCGTGGGCCACCCCCAAAGAAGGCTACGGACTCTGCATGTGTATGCAGCCTTGAATGCATAAACCTGAATAATCCTTCAAGTTGCTGTTCTTGACTTGTCAAAGCTCCAAAATTTGGTGTTATTGATCGTAAGAAGCCCAAACCAAGAAACATGTATGCATACAAAATTGCAACCCCTCTCCTTCCTGTTAGTAATTTCATTCTCCAAGTAAACCAGAGAATGTCCACCAAAGGTTTCACCATGCCTGTTACAAGACCCGACAGGTCTCCTCCAAGCTTTTCCACATCCTGGGTTATCCTCTGGTCGGCATCAATCCTTGTTTCTGATAGATGGAAAACTTTGTAAAAAGCATTGTTGCTGAAGTACAGACTAGATAAATGTTCGGTCATTCGTCTGCGCCATCCAAGGGCCAATAGTGCTGCTAAATATCTTAAGGATGGTGCCACAACTGATGATGCTGCACTCTGCAGGACACTTATACCAGTCAGCCGGATAAAAGCTGCCTTATCCTGTTCAAGTACGTACTTAACGCTTGTTCCATTCAAATGTGCAATTCGATCTGAAATCCAGGTCCGAGCAATTACAAGCAATGCAACAGCCATCAATTGCGCACCTTGTTTTCCATGTAAGCTTGGCACCAGTATCTTTGATAATGCAGCCACTCTTATTGGCATACTTTGAGCTTCATTCTTCAACCTTGGAACCAGTGGAATGGGCACAAGAGCATCTTGCGGAGGTGATCTTGCAAGCACCTCTGCAATATAGGAATCTGATGCTCTGGAAGAGTGGTACGGATCATCCTCCTTTGATGTTGAGAAGATTTTCTTCACAGTCAAGGCATCATTCTGGCGGGCAGACATAGCTGCTCGTGTACTTTCTGAATCTTCGGAAGAAGCAGGTCCAGTGCCTTTGTAGTAAACAGTGGAAGAGCCTTCCCCATCCAAGGATAACACAATGTCATGAAAAGCAACCAGCGCTGGCCGGTGAGATATAGTAATACAAGATGTTCCCATAGCCCTCACTTTGGCACAAAATCTCTCCTCCATGTCAGTGGTCACTGCACTTGTGCACTCATCGAGTATAGCAAAGGAAGGCTTGTGATAGAACAACCTCGCCATCCCCAATCTTTGTTGTTCTCCCAGCGATAACTCATCCCCCCAGTTAACTTCCATTTCTAAGGGATAGCGGTCAAGGAGATACTCTAAATTAACATTTCTAAGTAGCTCCCGCATCCCTTCTTCATTAAGCATTTCAGTCTCCTTGTCACCTGTAAGGGGATATATTAATTGATCTCGTAAGGTCCCAACTGCAGTATAGGGCCTCTGTGGAACATAGAAGATAACATTGTTAAGAGAAGATCCTACTCCTGGCTTTGCAATACACCCAGCGACCAAAGGCCACAGGCCCCCAAGAACACGAAACAGAGAGCTCTTCCCACTCCCATTTGGACCAGTAATCAGTAAATTGGATCCAGGTTCTACTTTTAATGTGAGATTTTCCACCAAAGTGTTTCCAGTAGGGGTCACTACCTTCACTCCCTTGAATTCTATATGATTTGCTTCCACGAAATAGCCAGAACTATCCTTATTTGAAACCCCCCGATTGCTGCTTGTAAGCCTGAGCTCCCTTGCAACCAGCATCAGCTCCCTGATGCGATCTGCATAGCCACTGATCCTGTGCAGCTTGCGCGAATTAAAAGCGAAGGTTCCAAGAGCTTGAAACAAGGCTATGATAACACTGGTATGATATCGCATATTGCTCAGCATTTCTGCACGTCCTAACGTCGAATGATCTGGCTTAAGATTTCCAGAAAAGAATGGTTCAATAATCAAAACCACTCCAACTGTAGCCCCCAAGTATTTCAAAGTGAAATCCTGAATCATGCCGAACCACCACTGGGTGTGCAGAACAATACTCATATGTTTCACAAGTGTTTTGAATCTCTGCTTAACAAACGAGGATTCTCTATCTTGTCCTCCGTAGAATGCTATACTTTCAGAATGTGTCTGAAGCCTTGTATGAATTTGCCTGTAGTCTCCTTCTAATTGCTGTTCTCTGGACATCAACTTTCCAAAAGGAGGGGATACGCTTCCAGTAATAAAACCAGCACCAAGCACATAAGCCAAAATCCACAGTGCATACTTGGGGCTGGCATATGAACAAAGGCGCCAAGTGTAAAGTAGTCCATCAAAACATGCTGTCATGTTTTCTTGAATAACTTCACTAAGCTCAGATGAGAACCTAGGTATATCACTAGCAATCCGCTGTTCAGGATTGCTGATTCTCCTATCCACATGTGACATTTTGTAAAACGTCATGTTCTGGAAGTAGTCAGCATGCACTCGATCTGTTAAAATTTTTCGAAACTGCAAGCTTAGCATCCCAGTGATAAACTTGCTGGTGGAGAACAATGCTGACTGAGCTAGGCAAAGGAGAAGATTTTCAGCAATAAGCCGAATAAATAGAGGAGCACGCCTGAGAAAAGCAGCCCTGAATAGAAACCCTTGAACTTTGGCCAACCGATTGCTCAAGGCAGTTCTCAATACCGCTATAGCGGCTAGAGAAAGCAATGTTCTCATCCCCTTGGTTCCCATTTGAGCAATCAATATGCCAGCAAGTGCATTGACTGACTTCATTCCAGTTTTCTTCTGCTTTTGTCCACCTGTAGAGCTGCCCCCACCCACTGATTTCTCTGATGTGATTCCACCCTGAATACCTGAAGATGGTGATCGTGTCTTTTTCCTGTTGGAGGAGGAATGTGCATATGCAAGACCACCTCCAGCCACCAATACAGTGGCTGCGACCACCAAAGCTCTCCTTTTATTGGAGGGCTGCTGGAAGACCTTCAAAATCTGCAGGGATGCCATGATTAACTACAAAAGGTTCACCCAAAAGAAGCTTGCCTCCGATTTACTTTAATCGAGATAAAATGACCATAGCCTGGAAGCTCCTCTTGTGTGATAAAAAGGAGAATGCACAAAAGCAGCCTTCTGTAATGGAGGGAAACCTGTATGTGTCCTCCCTCAATTCATGTAAAGCAAGAGAAATCTCTGCTTTCCAGTCTAAAAATGGCCTTGCAAAAGCCCAGCTTCTGCGTCAAAAATGGAGATGTGCAAGATGAATACCTGCTTCTATGTGAGGGTTACTCCCTCTCTTCTTCTTCCTATCTGTTTGTGTATGTACATGTGTACAAAACCTCTTAGTGCTGCGACGAAATGCTGCGATCCGATCTCAAGGGGTCCTTGCCATAGCCGAGCTTAGCAGGACAAATCTATGGCGGCAACTGCAAGCGAGGACTCCTTGAGCTCCTTTTCTTCTTGTCTTTCTCGTATTGTTCGTTCAAATCCTTAACAATT |
| **ATP-BINDING CASSETTE C5 (ABCC5):**  GCTGGCATGCAAGAGGATGCAGAAGTTGTTGAAGCCTTGAGAGTGAAGAATAAAGCATGGAAGAATCCAGAATGTGATTGATATGGATGGAAGCATGGAAACGTTCATTATTTTACAAAGCACGTATAGTGCTTGCAGAAAGCAACCTCATCCATGCGAAGCTAGATGATGTTGCATGTAAATTATTTACGCCATCAAGCCTTGCTAAGGGTACTATAGTAAACGTGTTATTAGCCATGAAGATACCTTCAGAATTTGGAATATGCTCCACGTGGACAATGGTTGGGCTCCACAGATTTATGTTAATTGGGCTGAAGTTAATTCGGGCTGTTCTCCAAAACAGTGGTCTGCTTTCAATTTTGGGAAAAAGTGAGTGCTAACTTTTCTCTCTCCAATGCTAATTTTGGGAAAGAGTGCGTACTGCTCTCTCCATGCTTTTGGCTCTCCACACATAGCGCACACAGCAAACGTAAGGACTTGTGTGTGTGGGGGGTACGAACCAGGAGGGTGTTGAAGGTGATGTTGAAGAGGGAGGGGAGAGCCCTAAGAGCCTTGTTTCCCATAGCATTCATGATAAGTCTATGGGTACATGATTTTGAAGCTCAATTATTCTCGCTCGTCATTTTCGTCGTGGCCATGCCCTCCCATAGAAATTACATGTGGAGGAGCAGGTCCTTGTTGCCAGTGATAACCTCTTTTGGGCTCGAACGCTATGCCCTCAAGGGCAGTTGGATATGGCAATCAATATGCTATGTGACTCCTACTTCATCTTACATCTACTTTTCCCTCCTGAAGGCATGCAATAATCGTAAAGCCCTTTCTCAAGCTCAGAAAGTGCATGCCCATCTTGCCCGGCATCATATCTCGTTCTCTGGCTTTCTGGGTGACTACCTGGCAATGACCCTTGCAAGATGTGGTGCTGGCGAAGATGCACTTGAATTGTTTCTTGGCTTGAGTTGCTGCATTGTCTACTATTGGACTGCCATTATCTCTGCTTACACAGAATGTGGACACGAAGAGGAAGTGCTTAGACTGTATGAGCGAATGCTAGATGATGGTGTGGAATCGGGTTCTTATACTTTTGTTTGCCTCTTTAAAGCTTTACTCTGGACCTTGTTTATGTCAAGAAACTTCATTGCTCGTAAATGTAAATTTGCGGAGGAGCTTGATACATCATGTACTTGCTTGTACCAACGCATTAGGAGAGCACACATACTCAAGAAGGAGAGAGAGAGGTGTTGTCACGAACGCCCCTGCATGAACACAAAAAGACAGAGAGAGAGAGTGCTAGTGAGCCATGTTTTTATTATTGAAAATATGTAGGCAGAGAAGACCTTAAGCAACATTTTAGTTTTAAACGTTTTTTGAAAGTGTACATTTTCACACATATGTATAGTGCTTCACAATTCAAATTCTACATCCATGTATTTCAATTCCTCCTGTACCACACTCCTACTCTTACTCTTGCTTGCTAGCCACCTCTAGTTTTAAGGGCGAGCACTGGTTGCACACACTCTCTTAAAATGGGCAATTTTGTCCCTCTCATTGACCGAGTGTCTTTACGTTTCTTCCAGCTCCGCTCGTAAACGCTTTAGCTCTGATGAAACCTAATTCGCCATAGCAGTTGCATTGAAGCGTTCAGCAATTATCAAATCTCATTCACAAATTAACAACTCTACTTTGTTGAATGCAGGCTTTGATCACAAAAAATAAGAGAGAATTTTATTTTGAAGCTGTTTCCCAATGCCACAACCCTGGGCAGCTTACTGCCATCTTACGAATTGCTCAGATTTTTCTCGGTGTCCACAAAATTTGTCATCAGATGGGCATGCATATGTAGTTGATCCATGCTTGCTTTATCTGGTGCTTTGCACAGTTCATCTTGTCTTTCTGCTAGCATTTTATCTCTCCAAGAGTTGGAACAAGATCAAGAAGAACAAGGGTTTGACAGCACATCGGGCTTCTAAGAACACACAGGTTAATACTGTTGGATTTTTGTACAAGGCAAGTCTTGGTTCAAGTGTTTTCCTCTGCGTGTCATACGTCGCAGTTTTGATATGGGGTGGCTTCTCTGCAATAGAGAAGGGATGGCACCGCTTTGTAATAGTAGAAGTAGCTTCATTTCTCCAAGTATGCTCATGGTACACGATGAGTGCTGCCATTGTGAATGCAAAAGAAGAAAGAAAAACCAGCTATCCTCGCATATTACGCGTGTGGTGGATCCTATCTTTCTTCACAGCTTCTCTCACATTCGCCTCAAGGTTTTTGGTTTGGAAAAGACAGATGGCGTTGCAGTTGGATGCATATGTTGATCTGTTTGCTCTTCCACCATGTTTGTTCCTCTGCATTGTTGCTGTCTATGGAAGGAGTGGCATTCGTATGCCTGCTCCAGATGGCGTATTTGAGCCTCTCTTAAATGGTTCCTCCGAAAAATCATCCTTTGTGAAGAAGGTGACCAATTATGCATCAGCTAATCTTTATAGCCTAGCTACATTGTCTTGGCTGGACAGTGTACTTGCTATTGGCTACAAGAAACCCCTCGAACTTGACGACATACCTCAGCTTGCACTTAAAGATCGTGCAGCCTTTGCATCTGAACTTTTTGAAACCTATTGGACCAACTTGAAAGCAAAGAATCTCATTAAGTGCCTTGCTTTCTCCCTATGGAAAGAGACACTGATAAATGCAATTTTTGCTGGGTTATGCACATTTGCTTCCTATGTGGGACCATACATGATTGATGATTTTGTGGAGTATTTGGGTGGGAGAAGACGTTTTCCTCATGAAGGGTACATTTTAACATTTGTGTTCTTTGTGGCAAAGCTTATTGAGACCTTAGCACAAAGACAGTGGTTTTTTGGTGCACAGCAATTAGGCTTGCGGATAACAGCAGCATTAAGTGCTGTTATCTACAAGAAGGGATTGTCTTTGTCAAACCAATCACGCAGAAACCATACAAGTGGAGAAATCGTGAATTATGTCAGTGTGGATGTGAAGAGAGTGAGTGACTTCACTTGGTACCTGCATGAGCTGTGGCTATTGGTTTTACAGATTTCCTTAGCTCTTTTCATCCTTTACAAGAACCTGGGCTTGGCAGCATTTGCCACACTTGGGGCCACTGCATTGGTAATGCTTGCTAATCTTCCACTCTCTACTGTGCTTGAAAAATTTCAAAGCAGGATTATGGAAGCAAAGGACGCACGAATGAGGGCCACATCTGAAGTGTTGAGGAGCATGAGGGTTTTAAAACTACAGGCATGGGAAATGAGATATTTGAAGAAGATACAAGATTTAAGGAACGTGGAAAGTGGGTGGCTTCACAGGTTTATGTATGCTCAAGCAGGTGTAGTTGCTGTATTTTGGTGCACACCAGCAATGGTTGGGGTGATCACGTTTGCAACATGTGTGTTGATTGGGACGCCTCTAACAGCAGGAAGGGTTCTTTCAGCGCTGGCCACGTTCAGGATTCTTCAGGACCCAGTATATGGGATCCCAGATCTTGTTGGAATGCTTGCAGAGACAAAGGTCTCAGTGCAGAGAATTCAGAAGTTTCTAGAAGAGAAAGAGATAGATGAAAGTGCTGTGGCACGCTCGGTGATAGCAAGTGATGAGTTGATGGCGGCAGTCGAGATACACGACGCATGCTTTAGCTGGAACTCTTGCCAAGAAATACCTACTTTAACTGTGCAGCAGCTGCAAATTGCGAAGGGCTCAAAAGTGGCAATATGTGGACAAGTTGGTTCAGGAAAGTCAAGTTTGATATCTTGTATTCTTGGGGAGCTTCCTAAGCTCTCGGGTAGTGTAAAAGTGTCTGGGAGTACAGCATATGTTGCACAGACAGCATGGATTCAAAGTGGCAAAGTTCAAGATAACATCTTGTTTGGAAATCAAATGGATAGGCAGAAGTACGATAATGTATTAAGTGTTTGCTCGCTGACAAAGGATCTAGAGCTTTTGTCACATGGTGATCAAACAGAGATTGGTGAACGCGGTATCAATTTGAGCGGTGGACAAAAGCAAAGAATTCAGTTGGCTCGTGCCCTCTATCAAGATGCAGATATTTACCTCCTTGATGATCCTTTTAGTGCAGTTGATGCACACACAGGATCTCATCTTTTCCAGAAATGCATATTGGAGTTACTTGAAAGAAAGACTGTTGTGTATGTCACACATCAAGTGGAGTTCTTGCCTGCAGCAGATAAGATACTGGTGCTTGAAGACGGGGCCATTGTTCAAGCAGGGGGATTCAATGATCTTATGCAATCTGGGGCGAACTTCTGCAAACTGATTGGGGCACACACTAAGGCTCTTGAAAGTGTTGAAAACACAGAATGTGCAAGGACATTGGAAGAAAACCTTGAAAGAGTAGACAAAGTTCTTGTGGAAGATAAGGTAGAGGTGGAAGGAAATGCCATTAAGCCACAAAATCCTGATAGCTCTAAGGATCCAGAAAATCCTGATAGCTCTAAGGATTCCAAGGCTTTGAAACAACTTGTACAAGAAGAAGAGAGAGAGACTGGTAAAGTTAGTGCAAAGGTCTACTGGTCTTTAGTAACAGCTGTATATGGGGGTGCACTTGTTCCTTTCTTGCTGTTGTCACAGGTTCTGTTCCAGGCTCTACAGATTGCTAGTAATTACTGGATGGCATGGGCCACTCCTGTAAATCTTGATGAGCCTCCAAAAGCTAGTAATAGAGTTCTTCTTAGTGTATACCTTGGGCTGGCAGTTGCAAGTGCCCTTTGCATACTTGCCAGAGCTCTCCTTCTTGCATTTACAGCTCTCGAAACAGCACAGAAATTTTTTGTCAACATGTTACAGTCAGTATTCCATGCACCTATGTCATTTTTTGATGCTACACCAGCAGGCCGTATTCTTAGTCGTGCTTCAACAGATCAAAGTGCACTGGACTTGGAGGTCTGCAATAGATTTGCGGGCCTGGCATTCAACATTATACAATTTATAGGGATAATTGTGGTCATGTCTCAAATTGCATGGCAGATTTTTGCTTTGTTCATTCCAGTAATTGGCTTCTCTTTATGGCTTCAGCGATATTATATTGCGTCTGCTAGAGAACTTGCAAGGCTCGTGGGAATTCGGAGATCACCAATAATTCACCATTTCAGTGAGTCGATATCTGGAGTGGCTACAATCAGAGGATTTGGGCAAGAGTCTCGTTTCAAAGACACGAATTTGGAGCTGATTGACAGTTATTGCAGACCCCTTTTTCACAATTTTGCAGCAATGGAATGGCTGTGCTTACGCTTGAATGTGCTCTCCAATGTTGTTTTTCTACTCGCTTTGCTACTGGTTGTAAGCTTACCTGTTGGCACCTTTGATGCAAGTATTGCTGGGCTAGCTGTGACTTATGGCTTGGGCGTAAGTTTTTTACAGTACATGGTCATATGGAACCTTTGTAACCTGGAGAACAAAATAATATCAGTAGAGCGTGTCCAACAATACTGCGTCATTCCTTCTGAAGCTCCTTTGGTTGTAGAGAATTGTCGGCCCCCCAGCAGCTGGCCATGGGCAGGAACAGTCACCCTTGAGAATTTGCAGGTGAAATATGCTCCCCATCTGCCCATGGTGCTGCGTGGGATCACATGCACTTTCTTGGGTGGGCAGAAAATTGGTGTTGTAGGCCGGACTGGCAGCGGAAAGTCGACTCTCATACAAGTCTTGTTCCGAATAGTAGAACCTGTTGCAGGAAAAGTGCTGATAGATGACCTTGACATTTCTCAAATGGGGTTACACGACCTGCGTTCCAAATTGAGCATTATTCCACAAGATCCTACACTATTCGAAGGGACTATACGCAATAATCTTGATCCATTGGAAGAGTGTACAGATGCAGAGATCTGGAAGGCTCTCGACAAGAGTCAACTTGGGGATGTTATTCGAGCTAAAGATGAGAAACTTGAAGCTCCAGTTAGTGAGAATGGGGAAAATTGGAGTGTTGGGCAGCGTCAGCTTGTGTGCCTTGGACGTGCTCTTCTGAAGCGGACACGCATCTTGGTCCTGGATGAAGCCACTGCTTCCGTGGACACAGCAACTGATGGTGTCATACAAGATACGATACGGGCAGAATTTACAGATTGTACAGTCATTACAATTGCGCATCGTGTTCCAAGTGTCATTGACAGTGACCGTGTTTTGTTTTTGAGTGATGGAAAGGTAGCAGAATATGAGTCCCCAGGACGACTCTTGGCGGACAAATCATCTTTGTTTGCAAGGCTGGTTGCAGAGTATACGCAGAGGTCAAGTAATGTTGCCCTGCGCTGACTTCTACAAATCAGCGGCTTTAGAAAAGATTTTGCTAGTTTGAGGGCTAGTCAAGCAACTTAAACTCGAACGAGCCTCGCTTAGAGAAATTCCATGTATGCAGCATCTCTGATTGCTTCTCGCCACTTTGCCACCAAAATCCTTTACAGCAGGATTGGCACTTTTCTCCACTCAAATTTTGTCAAGAAGCTTGTGTGCATGCTATTGTGCACTATGTAAAGACTGCATGCCAGCAACATCCGAAGCAAATGTAGAGAAAGTTAAAGCTTTTGATGTCAATTTGTTTTATGGAAATATTAAAAAACAACTTGAGGGCAAGACCAAGGTAAGTTACAAAAAAGAGTAGATGAGG |
| **CYCLIC NUCLEOTIDE GATED CHANNEL 2 (CNGC2)**:  CCGACTCAATGAACTTGCTTATTAAGATATACGAATAAAAGAATTACAAGGGAACTTACTCTAAGTGATCCTGAGGTTTATGTGAGTTAAACATTGCTGCATAGAATCGAAGGCGGTCACACTCCGACTCTGATCGAGCAAGCGGTGAGATTATTGAAGTGGTGCGATGTATGAATGGGAGCTCCATAGCCTCATCTACAGGCACCTTTTGTTTCCTAGCCTGATAGCGCCTCCAAGCAAGCTGGATTGTGACCACAGCCCATGTCCTCCACCCAGAGGAGTAATACCTTGCTGTCCTCTTCAAATTCTCATTTACAAACTTATACCGGAAATGTTCTGTTACAAACTTGAGATCTTGAGCCTCCAGCCCGAAAGCTTCTGTAGAATCCAAAGACTTGAGCGTCGCAAAAGAGGGGGGGAGCCGTTCTACAAATGGCTTTTTTAAACACCACGTCAAAAGCTCATCTCCACAAAAGTTTCCAGGGCCTAGACAGCAAATGCTAGAATTCCCGTTGCTTAAATCATGGCTGCTAAGGAGATGCCCTCGAACAATGAAAAGCATCCGCTGCACCGGATCTCCTTCCCTGATAACCACTTCATCCTTGATGTAAAGATGTGGCTTTAGACGTTCACAAATGTTTTCTAGAACCAGGTTGTCCATGTGCTCAAAAAGAGGCACCTGACGAACAAGATCCAGAGATAAATGTTGCTTGATGTCCCGTCTTAGCCCTTCAGGTAACCCGCGAACAATTTCCACTTCATCCACACCCCGTGTTGCTGCCCAATGGTGGCGTTCATACCTTCTTACTCTACGTCTGAGACGTGATGGAAGTTGCCGCCGACGCATCCAGCATTCAAGATCTCTTAGCTTCAGCTTCATGGCTTCTTTCTTAGCTGTTATTGAATGCAGGAAAACCTGAATATTGCCAATCAGTAATGTGAAAAGAAGCAGACCGCAAGTGATGACTACAATACTGAAGAGCACCTCTAAACTTTCGTTGCTTGGCTGAAGTGCATTACCAAACGAGCTTAGAGTCATCAGACCCCAAAATATGGGATACAGAAGCTTTGTAGACCATGTGTGACCAGTCACCAAAGGTACTGCCCACTGAAATATCCCATAGTTGTAGCTTTGATTGTTTGGACTATCAAAGCAGAGAGAAAGACTTGTCTGATTGTTCCATGAAAAAGCTGCATTATCCAGCAGTCCTGTGCCTTGATATGTGGTCGGGCGGGAACAGCCCAATAATTGTACAATACAACTGCTCCCTTCTTTACACTGATGTATCAGACAAGCCACAACCCGTTGACTTGCTAGCAGATACCAGCAAGCACCAGCCACATGGGCAGCAATGAAGTAAGCTGTTATATTCAAAGCAAAACCCCACCAAACTGTTCCAAAGACAAAGCCTGTTACATGTCTCATGCGCCGGGCAAGAAAGACCAAATGAACAACTTTGGGAATGTATTGAAAAAGGAATGTGGTCAAAAAAACTGTCATAACAGATCCCACATCTCCTCTGCTGATCATGTGTGGTACTACTATCCACAAGATAATCTGAGGTAGCGGCAATACAACAAAGAGGTCGAACCAGAAACCTCCGCCAGGCCGAAGGTAATGTAGAGCTATTTCGCGAGCATCCCATACAAGGCTTCCACGACCAAGAATTAGGGATTCCTTGGAGACATATGCCAGCTTCAACTGCAGCCAAATTTGAAATAGCTGCACTGCATCGCAAGCTGTTCTGAGGAATGTAACTAAAGCAGCAAGTGTACCATCCATATATAAACATGTGGGCTCTTTCCTGAATGCCAGGACATAGAAGAAAAGTGGGTCTATGGCTAGTGAGACTGAACGAGCTAGGAGAAAAGACTGGTTCAACTTTTGTATAACCCTCCGACGAGGGTCTAGTACTGCACCAAAAATCCAATGCCGCTGTTTCTTTTGAATGGGCTTGAGAGGGATGTCAGTGCTTACGGGGTATAATGAAGAGCCCGCATTGGCTTCCAAAAAGAGCGGATGATTTTGCTCACAGCTCACAGAATGAAAGCGTGGAAGCCCCTTCTGAATGCACTCATTACATGGCTCCGTGATGTCTCTCTTTGATGATGATGGCTCGGAACCATCATCACTAGAAAGAGTGCTCCCCTCTATCTTCTTCAAAGCTTTTTTCAACAAGCTGAAGATGGCAGTGAACTTCATGTCTCAGCTTCTTTATCACACAAGCAATTTACAGGTAGTGAACGTATGTTCCAAGTTGAAACTGTAATGCAAAAATCTTTGAACTATGATTCTGTTACCAAAGCTGCTGGAGAAGTAACCCAGACATGCCGAAAAGTACACCGAAAGTTGTGTACCAGATAACCAGTGAGCCAATTGAAACGAAGAGAATGTGGTAGCTCTCTCAGTTGCACCAGCTTGGAACCTCCGCTGGAATTTTAAAGCGTCCCACAGGAACATAGATGCATGGGTTTAATTAACAATCCGCGAATCTCCGACACATGAATTGTGTAAAACCGACACATGAATTGTGTAAAACAAGGGGTTTACGGTGTACTGCTAGTGGGTTGCAAGTGGGTTTTTTGGGTTGGGATTCCTAATGGCGTACACCGACTTTTCTGTGTGTTCTTGAAGACTATGTATCCAGATGAAGAAGCACGGCTTGCAAAATCGCCAATATTCTGCAGAGATTGGTGAAGGGAAATATTTGCACGGTAGGTTTTCGCGATTGCGCACAAGGGGTTTTATTTTGATCTAAGGCGAACAGAAGCGATTTGTTCGTGAGCTTGTCTCACCTGCAGAAGGGTTTCCTGCTCGAGCTTGTCTTCTGCGCGCAGCGAGAGAGAGAGAGAGAG |
| **DEFENSE, NO DEATH 2 (DND2)**:  TCTCTCTCTCTCTCTCTGCGCGCAGAAGACAAGCTCGAGCAGGAAACCCTTCTGCAGGTGAGACAAGCTCACGAACAAATCGCTTCTATTTGCCTTAGATCAAAATAAAACCCCTTGTGCGCAATCGCGAAAACCTACCGTGCAAATATTTCCCTTCACCAATCTCTGCAGAATATTGGCGATTTTGCAAGCCGTGCTTCTTCATCTGGATACATACTCTTCAAGAACACGCAGAAAAGTCGGTGTACGCCATTAGGAATCCCAACCCAAAAAACCCTCTAGCAGTAAACCGTAAACCCCTTGTTTTACACAATTCATGTGTCGGTTTTACACAATTCATGTGTCGGAGATTCGCGGATTGTTAATTAAACCCATGCATCTATGTTCCTGTGGGACGCTTTAAAATTCCAGCGGAGGTTCCAAGTTGGTGCAACTGAGAGAGCTACCACATTCTCTTCGTTTCAATTGGCTCACTGGTTATCTGGTACACAACTTTCGGTGTACTTTTCGGCATGTCTGGGTTACTTCTCCAGCAGCTTTGGTAACAGAATCATAGTTCAAAGATTTTTGCAATACAGTTTCAACTTGAAACATACGTTCACTACCTGTAAATTGCCTGTGTGATAAAGAAGCTGAGACATGAAGTTCACTGCCATCTTTAGCTTGTTGAAAAAAGCTTTGAAGAAGATAGAGGGGAGCACTCTTTCTAGTGATGATGGTTTGGAGCCATCATCATCAAAGAGAGACATCACGGAGCCATGTAATGAGTGCATTCAGAAGGGGCTTCCACGCTTTCATTCTGTGAGCTATGAGCAAAATCATCCACTCTTTTTGGAAACCAATGCAGGCTCTTCATTATACCTTGTAAGCACTCACATCCCTCTCAAGCCCATTCAGAAGAAACGGCATTGGATTTTTGGTACAGTACTCGACCCTCGTCGGACCCTCGTCGGAGGGTTATACAAAAGTTGAACCAGTCTTTTCTCCTAGCTCGTTCAGTCTCGCTAGCCATAGACCCACTTTTCTTCTATGTACTGGCATTCAGGAAAGAGCACGCATGTTTATATATGGATGGTACACTTGCTACTTTAGTTACATTTCTCAGAACAGCTTGCAATGCAGTGCATCTGTTGCAAATTTGGCAGCAGTTGAAGCTGGCATATGTCTCCAAGGAATCCCTGATTCTTGGTCGTGGAAGCCTTGTATGCGATGCTCGTGAAATAGCTCTACATTACCTTCGGCCTGGCGGAGGTTTCTGGTTCGACCTCTTTGTTGTATTGCCACTACCTGAGGTGCATTGTGCATCACTGAAAATGCATACTATGGTGAGGAAGTGATTGTGCCATAAATGCATTTAGTTGTTGAACAATGCAGTGATAGTGTGCTGTTGTGTACATGATGATGCATCATGTAGGTTTGCCAACATTTTGGTTCTGCAGTATTAGCAGCACTGTAGCATTGGTATGCTATGATTGATTGTGACACGCCGTGCTATGAGATGTATAACACAATGTGCAATATTCAGACATGACCTTGTCAGTGATGCATTAAATTGTAAGTGTTTCATACATCTTGATGCACTATATAGATTTCATATTCTCCATTGTCAACAGTGCCTTAGATTTAATGCACCAGCTCCATTTGCAACATGGGAATGCTTTTTGCTTACTATGTATGTTTTCCGTGACTTTCATAAATTTTTCAAAGCTTGTCTAGCAATGCATAATGATGCGCTTAGTAATTGTTTCTATGTGCTTGTACTGCAGATTATCTTGTGGATAGTAGTACCATACATGATCAGCAGAGGAGATGTGGGATCTGTTATGACAGTTTTTTTGACAACATTCCTTTTTCAATACATTCCCAAAGTTGTTCATTTGGTCTTTCTTGCCCGGCGCATGAGACATGTAACAGGCTTTGTCTTTGGAACAGTTTGGTGGGGTTTTGCTTTGAATATAACAGCTTACTTCATTGCTGCCCATGTGGCTGGTGCTTGCTGGTATCTGCTAGCAAGTCAACGGGTTGTGGCTTGTCTGATACATCAGTGTAAAGAAGGGAGCAGTTGTATTGTACAATTATTGGGCTGTTCCCGCCCGACCACATATCAAGGCACAGGACTGCTGGATAATGCAGCTTTTTCATGGAACAATCAGACAAGTCTTTCTCTCTGCTTTGATAGTCCAAACAATCAAAGCTACAACTATGGGATATTTCAGTGGGCAGTACCTTTGGTGACTGGTCACACATGGTCTACAAAGCTTCTGTATCCCATATTTTGGGGTCTGATGACTCTAAGCTCGTTTGGTAATGCACTTCAGCCAAGCAACGAAAGTTTAGAGGTGCTCTTCAGTATTGTAGTCATCACTTGCGGTCTGCTTCTTTTCACATTACTGATTGGCAATATTCAGGTTTTCCTGCATTCAATAACAGCTAAGAAAGAAGCCATGAAGCTGAAGCTAAGAGATCTTGAATGCTGGATGCGTCGGCGGCAACTTCCATCACGTCTCAGACGTAGAGTAAGAAGGTATGAACGCCACCATTGGGCAGCAACACGGGGTGTGGATGAAGTGGAAATTGTTCGCGGGTTACCTGAAGGGCTAAGACGGGACATCAAGCAACATTTATCTCTGGATCTTGTTCGTCAGGTGCCTCTTTTTGAGCACATGGACAACCTGGTTCTAGAAAACATTTGTGAACGTCTAAAGCCACATCTTTACATCAAGGATGAAGTGGTTATCAGGGAAGGAGATCCGGTGCAGCGGATGCTTTTCATTGTTCGAGGGCATCTCCTTAGCAGCCATGATTTAAGCAACGGGAATTCTAGCATTTGCTGTCTAGGCCCTGGAAACTTTTGTGGAGATGAGCTTTTGACATGGTGTTTAAAAAAGCCATTTGTAGAACGGCTCCCCCCCTCTTTTGCGACGCTCAAGTCTTTGGATTCTACAGAAGCTTTCGGGCTGGAGGCTCAAGATCTCAAGTTTGTAACAGAACATTTCCGGTATAAGTTTGTAAATGAGAATTTGAAGAGGACAGCAAGGTATTACTCCTCTGGGTGGAGGACATGGGCTGTGGTCACAATCCAGCTTGCTTGGAGGCGCTATCAGGCTAGGAAACAAAAGGTGCCTGTAGATGAGGCTATGGAGCTCCCATTCATACATCGCACCACTTCAATAATCTCACCGCTTGCTCGATCAGAGTCGGAGTGTGACCGCCTTCGGTTCTATGCATCAATGTTTAACTCACATAAACCTCAGGATCACTTAGAGTAAGCTTCCTTGTAATTCTTTTATTCATATATCTTAATAAGCAAGTTCATTGAGTCGGTCAAAA |
| **VOLTAGE DEPENDENT ANION CHANNEL 1 (VDAC1)**:  TTTTAGGCCGGACACGCAAAATGGACGGTTGAGTACGCGAGCCCTCGCTCCTAAATCTAGCAGGGTAGCGGGTTTCTTCGTCTCTACCATAGCCAGCAATATTCCCTGCAACCTCTTCACTTGCGGCAAGTAGATTCCTTATTAAGCAGCTATTTGAAATGGGCAAAGGTCCTGGGCTTTTCACAGAAATCGGCAAGAAGGCAAAAGACCTTTTGTATAAGGATTACAATTACGATCATAAGTTTAGCGTTACAACGCACACTTCAAGTGGTTTGGCATTTACTTCATCTGGAAGCACAAAAGGTGAAGCCTTTGTAGGCGATGTTGCTGGCCAATTCAAGAGAGATAAGTGGACCACTGATTTGAAAGTGGACACGAGCTCAAATTTATCTGCAACGGTCACAGTGGATGAACTTGCACCGGGCTTGAAGACAATTTTGAACTACACATTACCTGACCAGAAGGCAGGGAAGGTGGAAATGCAATACAAGCAGGATTATACAGCTGTAAGCACCAGTGTGGGTCTAACTCCAGCCCCTCTTGCTGAGTTCTCAGCTGTTATCGGGTCTGCAGAGGCCGCTTTAGGTGGTGAGGTAGCTGTTGATACCGCTACACGAGATATCACGAAGTACAATGTAGCATTGAGTTTTGCGAAGCCAGATTTCACAGCTTCACTGTTTGTGGTGGACAAAGGTGACACTTTGAAGTTTTCCTATTTGCATACGTTAAGCCCTCTTACCAACTCTACTGTTGCGGCTGAAATTGCCCACAGCATCTCCAAGAATGAAAATACGTTCGCTGTTGGAGGCTTCTACATGCTGGATCCATTGACGATTGTCAAGGCCCGACTGAATCACAGCGGAAAAGTGGCTGCTCTGATTCAGCATGAGTGGAGACCGAAGTCATTGGTGACCATTTCGGGAGAAGTAGATGCTGGTGCATTAGACAGAAACACTAAGGTGGGGTTGTCATTATCAATGAAACCATGAGCATGGAGTGTTTTACCAATATGCCAGTCCCTTTGAGCTAGTAACAACCTTAGATAGCTGGGCTTAGTTCTACACGATCAGCCATTATGTTTGCAGGTAGTATCTCTCTGTACTAGAGGGTTTGGGCTACTTGATTTAGTCTGTGCTTCTTTGAGTTGAATAATTTTGGCGGCGGGAGGTTGTAATTTCGCTTTTGAGTTGGCCCATGTTTTGTATTTAGAAACCAAATTATGCATTGCTCCAATAAGACAGTAGATGCTTTAGCATTTTATAGATGATTATGTCAGTGGATTGAGCAAATCAGTCCGCCTGCTATCCTGTGGTGACGATTTATGCCAGAGAGCTTATTTGTTGCATCTTTCTTGGTGCAAGTCTTTTATTTTTCTTTGAAACGAAGTGAGGGTAATGTTGTCCAGGCATGAGTGATGAAGCATTTTATACATCCAGTAGAGCTCTTTCATCTACATAGACTGATTCAAAATGCAGAAATTTTTTCATTCCTATCTTGGAGCTAAGTAAATATATGCATTTGCTTCATGGGCTGTTCCTGGGTAAAGCCATTCAGTGTAAAAAGGCTAGGTTTAGTACATTCAATTGGACATGTTCTGTTTTGTGGG |
| **MECHANOSENSITIVE ION CHANNEL PROTEIN 1 (MSL1):**  ACAAAGGGCACGTGTTCTCAACATATGTTGAGCTGCGATTGGGAGACAAGTGTGGCGGGAGCTCAGCAGGAGTTGAATTTCTAGCAGCAGCAGCAGCAATGGCGAGGGTCAGCCGTCTGCATTCCATCTCTCTTTCTCTTCTCGATTCGCGAGGCGTCCCTCGCCTGCTCGCGTCTTCTGCAGCCTCCGTCCCCTTCAAAGCCCCCGATCTCTCTGCAGCTTTCTCATCATCGCCATGTCTTTATAGCTACGTCGTAACTTCATCGTCATTTCCATCTCCAAGCTTCTCTGGAGCTCGCTTCTTCAGAAGCTCATCTTTGAGAGATTTCGTTGGCGTTTCATGTAGCCCTTGCTCCCATGGACTGACTCGTAGCTTCTTCTCCAGTTCACGAGCAGGCAAGGCACCAGAAGCAAGCAGTGCGCCCCCTCCACCATCACCTGCAGATCCTCCACAAGAAAACGTGCAGGTGTTTCCTAAGGAGTTCACGGATGCTGCCAATAACACAGTGATTGCACTCAAAGAGACAGCCACATCTTCTATGGCTTGGATTCATGATTCCACAGAGAATTTTCTTCTTGTCTTGCGAGAGCGATTTGATCTTCCTGAGTACACATCAGAGACGGTGACACAGCTGCTCTACACCTCCATTGCTGCTGTTTTAGCTTGGCTTGTCATGCCTAGGGTTTTACGCATGTTTCACAGATACTTTGAGGACGGATCACATCTGATATTGCGGCGCTCTGAGAAGATTCCCTATGAAACAAGTATCTGGTCTGCTTTAGAGGACCCTGCCAAGGTTTTCATTTCTGTGATAGCATTTTCTCAACTGAGCTCCCTAATTGCACCAACAACCATTGCATCTCAGTATTTGCATCAGATATGGAAAGGAGCAGCAGCTGTCTCTCTGGTATGGTTTTTACATCGATGGAAGAGCAATGTGCTGTCAAGAATGCTTGCCAATGAGAAGTTGGGAAGTGTTGATAGGGAGCGCATTCATGCTTTAGAGAAGATCTCCTCTATGGGGCTCTTTATCCTTGGTGGAATGGGTGTCGCAGAAACGTGTGGCATAGCTGCTCATTCCGTTCTTACTGTTGGAGGAGTTGGAGGTGTGGCCACGGCTTTTGCTGCCAGAGATATACTAGGGAACATGCTCAGTGGGGTTGCTCTTCAATTCATGAAGCCTTTCTCTATTGGTGATACAATCAAAGCTGGGTCAATTGAGGGGCAAGTGCTTGATATTGGGCTCACTTCCACGCAACTGTTAGATCTTGATAAATTCCCTGTTGCTGTACCGAACTCTTTTTTCTCAAGCCAGGTGATAGTGAACAAATCACGGGCAACATGGCGTGCATTCACTGTAAAAATCCCTGTGCAGCTGAATGATTTCGAAAAAGTACCTCAAATCACGCAGGAGGTAAGAAATATGTTGAAGACTCATCCAAAGGTGACTCTCCAGAACGGCGTGCCACTCTGTTATGCTTCTCGTGTTGCTGGTACATCACTGGAGATTACGTTACTTTGCAATCTGGTATTCAAGGGTAGAGAGGATCTTTTATCAGCTGAGCAAGATATCACCTTGCAGACATTGAGAATTATAAGCAATTCTGGTGCAGCACTAAGTGCTCCTGCTTGAGATGAATTTTCTTGTAGAGAGCTGTACAGATTAGACTGAATCATGTAGCTGAATTATGTGGTTTGTATGCCAAAGACTTCGGCATTTTTTTGTAGCGAGACTTGACCGTCGACAAGTTGCTTGTACAGTAGTCAGCAGGGACGCGTCCTGTACATATGCAGTTCAATAGATTTAAGCATACAATCTTCTTTACACAAGTTTTGTAATGACCAATAAACAAGCTCTATAGCTGGTATCTGGATCCAGCATGCATGTTTTCGATAGTGGAGCGATTTGTTTTTTCAGATGGGATGGGTAAAGAACAAATGTCAACAGAGTTTCAAATTTCATTTAGACACGACTCTTATTTTAAAAA |
| **NATURAL RESISTANCE ASSOCIATED MACROPHAGE PROTEIN 4 (NRAMP4)**:  TGGACAGTTTAAGTTTTAACTTCCAGGCTCCAGCTAGTGCGCGATGATGCGATCGTGCGCTAAGCTGTTGTAGTAGTACTATAGGGCAGCGGCAGGGCCCCATGTTGATTATCCACAGAGAGAGAGAGAGTGCGTGCAGGGCATAGGCGTGGCACGGGGCCAAAGCGTGGCGAAGAACGCTTTCGTGCTTTTGTGCTTTTGTGGGTATTATGAAGGCATGCAGGGGCGCCCTTCTCCCTTAGTAGCCCACCGCCAATGGCACCCACAACACCCAGAACAGAGGAAGACGTAGACGAGGCTCGGCAGGCTCTTGTGCGCCACTTCCGATCTCACGACGAAGAGCGCGCCTACGAAAAGCAAGATCAAGTCGACGTCCTCTCCCAAGGGGAAATCCCTGCCTTCTCATGGAAGAAGCTCTGGCTCTTCACAGGTCCTGGCTTCCTCATGAGCATCGCTTACTTGGATCCTGGAAACCTCGAAAGCGATCTGCAGTCGGGTGCCATGGCTGGTTACTCACTCCTCTGGCTCCTCATGTGGGCCACTGTCATGGGCCTCATCTTGCAGCTGCTGTCCGCCCGATTGGGAGTCGCTACTGGCTGCGACTTGGCAGAACTTTGCAGAGAAGAATACCCTTCCTGGGCTAGAATTATACTCTGGCTGATGGCGGAAATTGCCATCATTGGAGCTGACATCCAGGAGGTCATTGGTAGTGCCATCGCCTTGCGTATCTTGTCCCTTGGTTACTTACCCTTGTGGGGCGGCGTTCTCATCACGGGCATTGATGGGTTTATATTCCTTTTCTTGGAAAACTATGGAATTAGGAAATTGGAAGCTCTTTTTGGAGTTCTGATCTCTGTCATGGGAATATCGTTCGCTTGGATGTTTGCCCAAGCCCAGCCCAGTGGAAGGGAATTGTTTTTGGGTCTTCTAATTCCAAGGGTGCCATCGGGCACAGTGAGTCAGGCTGTAGGAGTAGTGGGTGCATTGATAATGCCTCACAACATTTTTCTTCACTCGGCTCTAGTGCAATCACGAGATATTGATATTTCTAGTAGCTCCCATGTGAAAGAAGCTCTTCGATACTTCTCAATTGAGTCTGCTTTCGCCCTGCTCGTTTCCTTGATCATAAACGTCTTTGTTGTATCAGTGTTTGCAAAGGCCTTTTATGGGACCGACATAGCAGATTCAATTGGTCTTGCTAATGCGGGAGAGTATCTACAAGAACAATATGGTGGTGGATACTTTCCTATTTTGTACATCTGGGCAGTTGGATTACTAGCTGCTGGGCAAAGTAGTACAATGACTGGAACATATGCAGGCCAGTTTGTGATGGCAGGATTCTTAAATCTGAGGGTGAAGAAGTGGGTGCGGGCAGTTGTGACGCGATCAGTGGCAATCTTGCCAACCGTTATTATTGCACTTATCTTTGATGGATCAGAGCAGCGTTTGGACAATCTAAACGAGTGGCTTAATGTTCTACAGTCGGTCCAGCTTCCGTTTGCATTGATTCCTCTCTTGTGTATTGTCTCTAAAGAGCAAGTTATGGGAATATTCAAAATCGGACCCCTCATTAAGGCAGTGTCTTGGCTAATAGCTGCACTTGTTTTGGTTATCAATGGCTACCTGCTTGTGGAGTTCTGCTCAACTTACATTGTTGCAACCACCACAGTGACATCAATTCTTGGAGTACTAGCAGCTGTGTATGTCATGTTTGTAATTTATCTTGTTATTCAAGCATGGTATGGACATCATATAACTGGACTTTCCAAAAGCAACAGTTTACAGTAGACTGTGAGACAATTTGTACACAAATGATTCAAGAGCCAAGGCAAAATACTGTATAGAGAATTAGGACGGATCTCAAAAGCAAGAGGAAGAAATCAGAGCCCCTTAATTTTGATTTCCTAAATTTTTTATACCTTCATATACGCTAGGTTACAAACTCTGTCAATATGCTGTTAAACTTCTCTTTATTCCTCGAATAATTGTACGCTGGCAAATTGAGATGAGCTACTTGTGTTACCTGTTGATATTCACACCAACCCTTTTTCCAATGAAAAATACATTTTTGTCATGCTAAAAA |
| **BORON TRANSPORTER 1 (BOR1):**  TAACTCTCTTGTACAGATACAGAGTTTCATAATATGCATACATTTAAATAAATTATCCATCCATGAGTTTGTGAGAGTGTTCTTGCTGATTTGATGAGATGCTTTTTTCAGCATGCTTTTACAATGTAGGATACTTATTCAGAGAAAAGGAGCATACTTAGCTAGGTGCCATGGGGGGCAGGGGGCCCTTGCCTCCCCCACTTGGGGCCGGCAGGTCCCACCCCCATGTTGTTGTAATCTGAGTAGTGGGATATTTGGTGGGAAAATATCGAAAACGTCTTGTAATTGTATACCCAACTAATAGAGCAGTGTTATCGACACCATGTTGCTTTCCTGGGATAAAAGTTTACAACTACGCATCTATCATATCCAGGTTTAATCTTTTCAAAACTTATGCAGTTCACATCAGGATTTGGTCAAGTTGTCAAGGCTTTATTCCTCCTGCGGCTAGAGCTATATAAACATCAGTTGTTGATAGCTATCCCTTGCATTAAAAGACACCTACTATTTTATGCAGAAGCTCGCTCTAGGCGCTCTTAGGTATTGCTAGTTTCTACAATTTACAGTTTTGAATAGTGCCATGGCTGAAGCATCGAGCAAGGAGCCTCAAAGCACCATACAAGGGACTATTACATGAATACTTACATTCGAACTTGGCTCAGTCCTCCAGTATGGAAAGCAATTGCATCCCTTTTGATGGAATCAAGAAAGATATCAAAGGAAGGAGCAAATGCTACAAGCAGGACTGGACAAGTGGTTTTACCTCTGGTTTCAGGATTTTTGCCCCGACTACGTACATATTTTTTGCATCCGCCATTCCTGTCATTTCATTTGGAGAGCAGCTTGACCGGGACACCAATGGAATTTTGACTGCTGTCCAAACATTGGCATCCACTTCATTTTGTGGCATAGTGCATTCCATCATGGGCGGGCAGCCACTATTGGTACTTGGTGTGGCGGAGCCCACGGTCATCATGTATACATTCCTGTATAGCTTTGTCAAGGAAAGACATGATGTCGGCCCCAAACTATTTCTAGCTTGGGCTGGATGGGTTTGTGTGTGGACATCAATATTTCTATTTATACTGGCAATATTGGGTGCTTGCTCCATCATAAACCAGTTCACACGTGTAGCAGGAGAGCTTTTTGGCTTGCTAATAGCCATGCTGTTCATGCAACAGGCTATTGAGGGTGTCGTAGAGGAGTTTCGAATTCCCAAAAATGCTGATCAATCTCTTGAAGAATATGAGCCTGCATGGCGCTTTGCTAATGGCATGTTTGGCATGGTTCTCTCTTTTGGACTGCTTTGGACAGCTCTTAAAAGTAGAAAGGCTAGATCATGGCGGTATGGCACAGGTAGGTTGAGAGGGTTTGTTGCTGATTATGGAGTTCCACTGATGGTCCTTGTTTGGACGGGATTGTCGTATACAACTTTAAGGCATGTTCCAACAGGAATTCCAAGGCGGCTTTTCAGTCCAAACCCATGGTCACATAATGCTTCAAGAGATTGGACTGTCATACGGGAGATGACCCAGGTTCCAGTTCTTTACATTTTTGGTGCTCTTATTCCTGCCACCATGATAGCGGTTCTCTACTATTTTGATCATAGCATTGCGTCACAGCTTGCTCAGCAAAAGGAATTCAATCTGAGAAGGCCCTCAGCATTTCATTATGATTTGTTTTTACTTGGTATCCTGGTATATCCTTGTTTCCATTCAAAGACCTAGAATTGACAATTGACACACAAAAACAGGATTCTCTATGGTTCTTGTGACAGGTTATGGCTTGTGGGCTACTAGGAATACCTCCTTCAAATGGTGTTATACCCCAGTCACCAATGCACACAAAAAGCTTGGCAACTTTGAAACATCAACTGGTTCGTAAGAAGCTGGTGAAGACAGCGAGGAAGAGCATCGACCACAATTCAACATTGGCTGACCTTTATGAGAGCATGAAGGAGGCTTTTAAACAGACAGGGACACCATTACATCTGCAGACACCATCTTTCCGGGCAATGAAGGATTTGAAGGTCAGCACACTTCAGCGGGCTGCAAGCAGTGGTTGCCTTCACACTCCTGTTGATACTAGTGTTTTTGATCCTGATAAGGACATTGATGATCTACTACCTGTAGAGGTAAAAGAACAGCGCCTAAGCAATTTGATGCAGTCCTTGATGGTGGGAGGATGCGTTGGAGCAATGCCCCTATTGAAGAAGATCCCAACCTCTGTTTTGTGGGGATATTTTGCATACATGGCAATAGACAGCTTGTCTGGAAACCAGTTTTGGGAAAGAATACTCCTCCTCTTTACTCCACCCAGTCGTCGATACAAGGTCCTTGAACAATCCCATGCTTCATTTGTAGAGGCAGTGCCCTTCAAAATCATTAGCATTTTCACCATCTTTCAGCTTGTCTACCTGGTTGCCTGTTTTGGCATCACTTGGATCCCTCTAGCTGGAGTATTGTTCCCACTGCTGATCATGATGCTAGTTCCTGTTAGGAGGTATGCCTTGCCCAAGTTTTTCAAATCAGCACACTTGCAAGAACTTGATCGTGCCGAATACGAAGAATCCGCTGCCATGACACATGATATGGCTGTCAGGGAAGCAGATGAAAGTGGACTTGGCAGTGCAATGGGGTTGGATGAGGAGTATGATGAGGGCGAAGTATTTGATGAGATTATTACTAGTGGGAGAGGCGAAATCCGTCACCGTCATAGCTTTGCTTCTTCGCTTAATGGGAATCAACATGATGATCATGAGCTAGTCATGCAATATGTGATCCAACCTCTGCAAGGCCCCCAATCACATGTGACAACTCCATAAACCATTGATTAAACTCTCATATTTACTCTCTCATCAGTACAAGATGATTCTCATACAATGTGTAAGATTAGTTTTGACTTGCTTTGTCAACATATACTATATTGGGTAATTACCAAGGCCTCAATCACATGTCACAACTCCATTGATTAGTACCCAAACACTCATATAAAGTCACCTGCATCAATAGAAGCTATGTGTATTACATAATGATTTTGACATGCAAAAATTGCAGATAGTTGTCTACATATGCCTTGGAATTTGGAATTCTATGTCGTAAGCTTGTATACGCTAATTTGGTCTATCAACGGGACTTATAACTAGCAACAAACATTCTCATATTATTTGTTCCAATAATTAAAGGCGAGTGTAAA |
| **ATP/PHOSPHATE CARRIER 2 (APC2):**  TGCGCATAGAGCTCACACAGAGTCGATCTGTCTAGTTATCTCTTGTGAGGATACAAAGTTTGCAGATAGCGCAAGCGGTTCAGCTCCAATACAGAGTTTGGGCATGCATATCAAGCCGACTTGATACCTTTCATCAATTTGCGCGGGAGTTTTGGGGAGCTGCGTTGGCATAGAATCTCAAGAGGACTTGATGCATCCAGTCATCCTGTTTGAGAGTTCAAAGTTTCTGGGAATATGCTATACAGAGTTCAAGAGTTGATTTTATCACTCCAGCATACATCGCCCATGCCTGCTTAGGGTTCAAGCAGAGCTGATTTATCCAGGCATTTGGCGTGAGCTTACCAGGCTGCACAGAGTTCAAGCTTCAATCCCTCATGCCATTCTTTGCAATCACACAGAGATTGCGCCCTAAGCAGAGCTGTTGCATATCCAGTTCTTTTGTGTGATCTTATTAAGTGTGAGCATGCATTTCTACACACAGGTTATTTTTTGACCAGTTTATTCATTTAGTTGGTTTTTCCATCAGTCATTTTGTTTCAGCATTGGGGGTGCTGCATACCCGAAATGAAAGAAAGTGGCAGCAATGGTATCAGAAAGAGAGTCTCACTAGCAGAAATCGAATCAACTGGCATCACCAAAACACGGCCCGTCTGTACCCCGGTCCCTAGATCTAGCCCAGTCACTCTCTCTGAGGTTCGGTTGGCCCTTCAAGAGACTCAAGAGGAAAGAGCTCATCGCATTCACAACCTCTTTGATTTTTTTGACACTTCTCAGAAGGGTTACTTGGATCATTCAGACATTGAAGAAGGGTTTAAAGCTCTTGCCATCCCATCTCAATACAAGTATGCTAGGGATTTATTGGATGTCTGTGATGCCAATCATGATGGTCGTGTCGATTTTGATGAGTTCCATAAGTACATGGATGCTAAAGAGCTAGAACTGTACAGTATATTTAGAGAGATTGATGTGCGGCACAATGGATGCATTCTGCCTGAGGAGCTTCGCACGGCATTACAACAAGCAGGTTTTCCAACATCTAGCTCTTTGATTCAATCACGTAGCTACAACATTAATTGGGAATTCAGCTAAGTGATGAGGAGCTTACCCATTTTGTAGAGCGCATTGACAAGGACAACAATGGCATCATAACTTTTGAGGAATGGCGGGATTTTTTACTTCTTTATCCTCATACAGCCACCATGGCAAACATTTATCAGTATTGGGAAAAGGTTTGTTTGGTAGATATAGGAGAGCAGGCTGTGATTCCAGAAGGGATAAGTCGTCATATGCATGCAACCAAATATTTCATAGCTGGTGGATTTGCAGGTGCTTTATCTAGAACTGCAACCGCACCTTTGGATCGCCTGAAGGTGCTTCTGCAGGTGCAAACAAATTCCATGGGAGGAAAGCCCCGTATTGTACCCTGCATACTACAAATTTATAAAGAGGGAGGAATCTTGGGATTTTTCAGGGGAAATGGCCTTAATGTACTAAAAGTAGCTCCTGAATCAGCTATCAAATTCTATGCGTATGAGATGATAAAGGATTTTATGGTAAAGGCAGATGGTCTCCACAGTAAAGAGGAGATCAGTATTGTGGGCAGGCTTCTGGCAGGTGGGACCGCAGGCGCCATAGCTCAGACGGTTATCTATCCGATGGATTTAGTGAAAACACGATTGCAGACTTATGCTTGTATTGATGGAAAGGCTCCTCCCCTGATGAAGTTATCAAAAGACATATGGCATCAAGAGGGCCCTCGAGCATTTTACCGAGGGCTTTTACCATCACTACTTGGGATGATTCCATATGCTGGGATAGATCTTGCAGCTTATGAATCTTTGAAGAATATGTCACGACAATGGATGCCTGAAGATCGTGAGCCAGGGCCGTTAGTACAGTTATGCTGCGGGATGATTTCTGGCGCATTAGGAGCAACTTGCGTCTACCCATTGCAGCTAGTTAGAACAAGGTTGCAAGCACAGCAGATGAACTCAGCTACTAGGTACAAAGGAATGACTGATGTCTTTCAGAGAACTTTCAAAGAGGAAGGTTTCCGTGCCTTCTATAAAGGCCTCCTTCCAAACCTGCTAAAAGTGATTCCAGCTGCTAGCATTACCTACCTTGCATATGAGGAGGCAAGAAAAAGGCTCTCCATTTGATAGTGATTTTGTGGGCGTATTTTCAAATTAGAGCTTGCTACTTATTTATCCTTCGTACGAAGGCATGTGCGATTATGAAACTTACTGCATGGGATGGGAATTCAGTATTGAACAAGCTGCATCACAGTAATAAGAAGGGAGGTTGCCGCTACCATGGTTCACAAGGCTGGCTTCCTCTGAAACACATTTGAGTATCTTCCGCTTTCACTGTGCATGATTATTTTTGTGGTTACATAAACAGCCTAGCTTGTCAAAGGCCATGCAGTTTTCCAAGACAATCCTGCTTAGTCGGTATCCATTCACTGCCTTTATAAAACCCTACCTTCTTGTGCTTAAGGTTGAGGCCAGGGCGTATCCAGGCGTTAATTCTTAAATAAAATCATTACCTCATTACCGTAATCTCAACATATAATAAAGAGCTTCATCCCATTGTTTTCTAAATGTATAGCTCATTGAAATAACATCTGGACAGCAATGTACTTTATATGGTTCACAGTTTGAAAAAGCCTGTGATGGTTTTACAGATTGTGGCTTAAATTTTGTCATGGATGATCATCTTCCATGGTTATTTTAAAAAAA |
| **CATION/H+ EXCHANGER 17 (CHX17):**  TTCTCCTTCTCCTTCTTCTTCTTGTTGTTGCTCGCGCTCTCTTCTCCTCATCCTCCCTCTCCTCGAAGGCCGCAGCTATGGCGACCTCTGCAGCAGGCAACTCCTCTTGCCCCTCTCCCATGGCTGTTACCTCCAATGGGGTTTGGCAAGGAGATATCCCCACCAATTTTGCCCTTCCTTTGCTCATCTTGCAGATCTCCATCGTCCTCTTGGTCACCCGTGTTCTCGCTTTGCTTCTCAAGCCTCTCAAGCAGCCTCGCGTCATCGCAGAGATCATTGGTGGGGTTTTACTTGGCCCATCAGCATTGGGACGGAGCTCCAGCTTCAGCCAGAGAGTTTTTCCCAAGCAGAGCATAACCGTCTTGGAAACTGTGGCGGATTTGGGGCTTCTATTTTTCTTGTTCCTGGTTGGTTTGGAGCTTGATCTTAATGCCATAAAAAAGACAGGCAAGCAAGCCCTCTTGATTGCGGCTGCTGGAATCAGCCTCCCTTTCGTTATGGGGGTTGGTGTGTCTGTGGTCTTACACCAGACAATTGCAAGCGAAGGGAAGTTTGCACCCTTTCTTGTTTTCATGGGTGTGGCTTTGTCAATAACAGCTTTCCCCGTCCTTGCTAGAATTCTTGCAGAGAGAAGGCTTTTAACAACTGAAGTGGGGCAAATGGCCATGTCAGCCGCAGCTGTAAATGACGTCGTTGCATGGGTTCTACTAGCATTAGCAGTTGCTTTGTCGGGTTCAGGGAAGAGTCCACTCATAGCAGTGTGGGTGCTGCTGTGTGGACTGGCTTACGTAGCATTCATGTTTATGGTTGTGAAGCCCTTGATGGCGAAGGTAGCTATACAGGTTATAGAAAATGAGCCTGTAAATGAGATGTATGTGGCGGTGACATTGGCTGCTGTATTGGTGTCGGGTTTCGTGACGGACTCGATTGGCATTCATGCTATCTTTGGTGCTTTTGTGTTTGGGCTTGTCATCCCCAAACATGGCCCCTTTGCAGGTGCGCTTATCGAGAAGATTGAAGACCTGGTCACCATTTTGATGCTTCCCCTCTACTTTGCTGTCAGTGGTCTCAAAACCAACATTGGATCCATCCATGGTGCCCAGTCTGGTGGTCTTCTTGTCCTTGTCATTATGACAGCATGCTTCGGCAAAATTGTGGGAACTTTTTTGGTGGCATATTTTAGCAAGATGGGTTTCAGGAAGTCCCTCACTTTGGGATTTCTAATGAACACCAAAGGGCTAGTGGAGCTTATCGTCCTCAACATCGGGAAGGATCGAAAGGTCTTAAATGATGAAACATTTGCAATTATGGTTATAATGGCTCTGGTCACCACCTTCATCACTACACCTGTGGTCATGGGGCTCTACAAGCCTGCAAGGAACCCGGTCCCCTACACTCGTCGAACACTTTATGCACCTGACGAGAAGGTATCAGAGTCTGAGCTCCGCCTACTAGCATGTGTCCATGGAATGCCCAATGTGCGTGCTATCATCAACTTGGTGGAGGCTGCACGGGGTACCCGGCGACGACCTCTTCACATGTACATTCTGCACCTGCTGCAGTTGTCAGAGCGGCCGTCCTCAATTATGAAAGTGCAGAGAGTGCGACGAAATGGGCGTCCTTTCTGGGACAATCAACATTTCAATGGCTATGACAACATTGTGGTTGCATTTGAAGCTTTTGGGCAGCTCAGTAAGGTTACCGTGCGGCCCATGACTGCAATTTCTCGCTTCGACGACATGCATGAGGATATTTGTGCCACTGCTGAAGATAAGCATGCATCAATCATCATTCTCCCTTTCCACAAGCATGTCCGCCCTATGAGTGACAGAGGCTGGGAAGGCCACAGCTCGGGACTGCGCCATGTTACTCAGAAAGTTCTACAACATGCCCCTTGCTCTGTTGGCATTCTTGTTGACCGTGGCATCGGGAACACCTCTCGCTCTTCCAGTTCTGTGGACCAGAATGTCGCCGTCCTCTTTTATGGTGGCTCTGATGATCGTGAGGCTCTTGCTATTGGTTACCGCATGGCTGAGCACCCGGGAGTGAGGCTTTCTGTGTTCAGATTTATCTGCCAAGATCCAGCAGAGCATCATGTGGACTTAACAGTGTCACAGCAGCAAACAACCAATGGCACCTCCTTGAAACAAAGCAGTAGTAGGTTTTCTCTTAGCTCCAGGCACTCTTGGGGCCTTGAGATGTTTGAGGTGGCAATTGATGATGTTGATTGGGAGGCAGAGAGCAAGCTGGATGAGAGGTGCTTGGCATTGGCCAAGGGGAAGGTGCCAGAAGGGACTAATAACAACAGCGACAAGGATACAGCAGCTACGTCATCTATTAGATATGAAGAGAGAGCCATAGCTCATTCCGTAGAGGCAGCAATGGAAATTGGAAGGATGGATGCATGGAGTTTGGTAATTGTTGGGAGGGGGCGCAGGCCTTCTCCTTTAATTTCACCTTTCACAGGGCGGCAAGCAGATTATCCGGAGCTAGGTCCAATAGGTGCGGCTTTGACGACGGCAGCTCTCTCTGAGATCAAGTGTTCCGTACTTGTGGTGCAGCAGTATGATCAGAAGCTAGCGCAAGAGGTACCCCAATCATCCAAAATAATGGACATCTCAACCCCTAAATCTGTAAGTCTTCTGTCCTCGAGTCTTGTTGTAGTCACTGGCCCTGCAGCACCCCCTCCCGATTCCTCTAGTACACCCCAAGCTCCGCGTGTGCCTTTGTAGCAGCAGCCTTTGCACATTGCATCTATATCCCCTTTACGTTCCTTAAATTTTTACCACTAATTAGCAGTCCAATCACTGTGCTATCTGTTTGGACATCTATAAATCCTTCATGCGCCTTTGTAGCAACCTTTGTATATTGTATCCGTAACCAGCAGTCCAATCCTTGACTTTTTGTTTTCACAGTGTGCACAAAGCTTATTTCTAAGTACGATGCCAAGGTTTTTAATACATCATCAAGAAGCTTTGCACATGCAGTGCAGATGGTAACTGCCAGGCCTTTACATGTATTTGTTTGTCAAAGTTTAGTTTCCTTGCTTGATTATTGTAAAGCATGGCTATGGTGATTGCAAGATCCACTCCCTCAGCATTCATGGATCCACCACCTCAGCATTAATGGAGTATACATACATGACAAGGTTGCACAAGCTGCTTTATTTAAGAGTTCTGCAAAACTAGACTTATGAAAGTTGA |
| **HEAVY METAL ASSOCIATED PROTEIN 51 (HMP51):**  GTCACATTCACTCTTATAATATACAACAATAACTACCCTGCTAAAAGATAAAACGTGTCAACTTGAGCAACTTTGAAGGCATAAACAACTCTGAGCACAGTGTGACCGGAAGGTCCGATGCAGACACCTTTCCTGATGGCAATGACGAAGACAGCTAGCAGCGCTGGAAGATTCAAAGGGAAGTTCATAAAGCCGCCGAAACTCTGCAGCCTGGTACACACGTGCGCAACTTTTGCATCTGACTCACAAATGGGAACAGTTTAAAAATCCTCCATACGAGTGAAATTCCTTGTATGTTGAAGAGAACCTTGCTCATCTTGAGAGACCAGCTGGCACTCATAAAACCTATAATCATGAGGCACATTAGCCTCAGCTCCCGTGGAAGTACCTCATTCATCAATACAAACCCACCGAAGGCGTCTGACTTACTCTCACCAAAGAGCCCTTGTGTGCTCTATTGATGAAAATATATGCGAAGTCTGGCTGCATCCTCCCCCCACTCTGTCAAAATCAATGGACTTTTAGCTGAACCAGGTCCAAAAGCCGAGGCCTTTTATATCGTCTCAGCATCAAGGACGAGCAAACAACGCTCACTGAAGAGAAAGCCATCGCAGCACCAGCCGCCCAAGGAGGTAATAGCACTCCTAAAGTAGGGTACAATGCTCCAGCTGCAATTGGAACTGCCAAAATGTTGTACCCCATGGCAAATGCATAGTTGAGGCGTATGCGGGAAAAGGTTTTCCGCGATAAGTCAATTGCTGTCACCACACCTTCAAGGCTGTTTTTCATCAACACAAAGTCGGCAGCTTCAATGGCAATATCTGTGCCTGCCCCTATTGCAATACCAACATCAGCCACAGCTAGAGCAGGAGAGTCATTTATTCCATCCCCAACCATTGCAACAACAGAGCCACCCGCTTGAAGGTTTTTGATTGCCTCGGCCTTCTGACCTGGAAGAACCTCAGCAATGACACGTTCAATGCCAACCTCCTTTGCAATAGCACGTGCAGTCCTCCAGTTATCACCTGTAACCATAATGCTAGAAATACCCATCCTTTTCAATGCCTCCACTACTACGGCTGCTTCTAGCTTCAAAGGGTCTGCTATCCCAAAAATGCCCTCCAACAGGCCATCTATAGCTACCAACACTTCTGATCTAGCCTTTTGTTCAATTTCTAACAGATGAGCTTCAGCCTCCGACGAGATCACGACTTCTTCGTCCTCCAAGAGTTTTCGATTGCCAACCAAGAGGCTTTTACTGTCAACAAGGCAGCGCACTCCTTTCCCTGGAATGTTCTCAAATGAGTGAACATTTCTCAACCAGCCTGTGTTCTTGACATTTGGTACATTTATGGTCTCGTCGCCTTCTTGAGATGACAAAACGCCATTCATATAATCTACTATAGCTTTAGCCAACGGATGTTCACTGCCAGCCTCGGCAGATGCAACCAGCTCAAGAAAGTCCATCAGCTTCACATCCGAAAACAGCTTGATACTTGTGACACAAGGCTTTCCTTTCGTAAGGGTACCCGTCTTGTCAAAGACAATGTGCTTGATGTTTTGTGCAGTCTCTAAGGCATCCCCACCTTTGATGAGCACTCCGTTCGTTGCTCCAACTCCAGTCGCGACCATAACTGCTGTTGGCGTGGCTAACCCCAAAGCACAAGGACAAGCAATGACCAGAACGGAGATGGCAAACATAAGAGAGAACACAAAAAGGTTGGTTCCCGGCACAAAATCCAAAGAATACAAGCCAAACTTTCCAGCCATATACCAGCAAAACCATGTGACAAATGCCAATGAAACCACTACTGGAACAAAGATGCTAGCCACGTAGTCTGCAAACTTTTGAATGGGAGCTTTCACCATTTGAGCAGTCTCCACGAGGTTAACAATCTGTGTTAGTGCAGCCTCCGATCCCACATGTGTGACCCGAAGATGCAAGACTCCATTCATATTAAGGGTACCACCAATTAGTTTGTCACCAACCTCTTTTGCTACCGGTCTAGCCTCACCAGTGATCATGCTTTCATCCACATGACTTGTACCCCAGATGATAAGACCATCAGCCGGAATCTTTGACCCCGGATATACTTTCAAAACATCCTCTCGTTCCACCAACTGAGCATCAATCTCCTTCTCCATGATAGGATTCCCACCAGCATCAAATGTGAGTAGGATGGCAGTTGTTGGAGCCAGAGCCAAGAGCTTTCCAATAGATTCTGATGTCTTTCCTTTGGCAACCACTTCCAAATATTTCCCAAACAAGACAAAATTGATCAACATGACTGTTGTCTCAAAATATGTTACTAGCCACTGTCCGGTGATGGCGGTATAGAAAATGGCAAAAACAGAATACATGTAGGCAGCAGTTGTGCCCATGGCTACCAGCACATCCATATTAGCTGACATGTTCTTCAAGGAGCGAAAAGCTCCCACATAAAAGCGTTTTCCAACAATAAACTGAACAGGAGACACCAATGCCCATTTCAACCAATCAACTACAAGAAAGGGGCCACAATGCCATGTCATCAGATGATGAAAAGCTCGAACTCGAGGGCATACCACCCAGAGAAAAAGAATAGGGACACTGAATATAAAGCTCAATCTTAACAGTTGCAAATAATGCTGGAGTTCTGTCTTGCGGTCTGGGGAATATGAACTGTAAGGATGGGGTAACGATACTTTGAACTTGCCACTACCTTTGCCTTCTATAGCATCCACAATTGACCTCAACTTTACAATTTCTGGGTCAAAGTTAACTTCTACCCTCTCTAGCAGTGGGTCCACTGCAAATTCCTTCAAACCTTGAATCTGATTGAGGATATATTGGACAGCCTCACCATCCTCCTCAGAGAACATACCTTCAATTGTGATAACCATCTTGCTTCTTTTCTCACTTTCAAAAAATTCAGCTTCAAAGCCAGCGTCATTGATAGCAGCAACAATGTCTTCTTTGCTTACAACAAGTGGGTTATACCTTATCTCCCCCATGCTAGAAGCTAGGCCCACTGCAGCAGAGCTCACACCGTCTAACGAATGCAACACGCTTTCCACAGATACTACACAAGCTGCACAGCTGAGACCTGAGATCCTGAAGCGTCCTGTTATTGTAGAGCTGCCGGTAGCTGAAGGAGGGCTAACAACTGTCTTGGATAATATTTCAGCATCAAAACCTGCATCTTCTATTGCCTCCGTAATGGCATTCTCCTTAACCTCCGAAGGATCGTACTCTACGATGGCTTTGTTTTGGAGGAGGGCCACAGAAGCAGAGGAGACCCCAGGTAACCTCAAGAGGGCCTTCTCTACAGAGGTTGAGCAGGCAGCACAAGTCATGCCCTCCACTTTGACCTCTAATCTAGCAGAACCAGTCTCCGATTTAGCAGGCACCTGACCGATCACCAGATTAATGTCTCCATTGGCACCAGTCGGAGATAAAAGAGGGGCAGATTCCAGGTCAAAATCATCAAAATCCTCCTCATTTCGATGCTTTTCTAAACTCCTCCCCTTCCAGTTCATTAATTGCAAGGCCTTTGACATGATTCCAGGCCGCAAAAGCACAAAGATGATCAACTTCCAAAGGCAATTACAGATGGATCACAGTGTAAGAGAGGCACGCTTTGCTTCTCTTCAACCAAACGTGTTAATCAGTTTCTGGGAAAATGATACAAAAGGGCACAAAATGCACCTTGATTGATGATTGGGCGTATATTCCTCTCCTTATGGAAACCTAAATCAAGCCCTAAACCTTATACACCGGCTAGCCTACAATCAAATGGGCTTTTTTATGTACAGAAACCCAATCATGCAGAAGAAAGTCTTTTACTGCTCGGTCCACAACCTGCTTCGATATTGATTATGAGGTAAGTCAAATCTGGTGACCAAGAAGGCTTGATTGCTGAGTAATCCTGAAAAATGAAGCAGAACTGCTATCTGTGGAGAGAAAATGCTGTACAATAGAGCAAATTTGCTTTCAAATCAAAGATCAAGCCGGATAGCTTTCAGAAAGACCCTTGTGCTTGTTTTTTGAGAGGAAAACCCTATGGCCTGCTCAAATGAGAAGAAGACAAACCCTCATATGTGAGCGGGACTGTTCTTCTTAAATTGCTTGATAGGCGTTGAATTCTGAAGTGGGCGATCCGACGAGGTCTTACAATCTGTGTGTGTGTGGGTGTGTGTG |
| **NAMED PLASMA MEMBRANE INTRINSIC PROTEIN 1;2 (PIP1;2):**  GCCCAGCCTAGCTAGCAGCTCCTTACCATCAGCATCCTTGCCTTTATCAGCTCTTCTTCTTCCCCTTCTTCACTCACTCCCTATAGTGTCTGTTATCCAAGAGGAGGCCTTCTCATTAAGACTAACATCTTTTGAAGAAGAAGAAGAAGAAGAGATAGAAAATCAGAGATGGAGTCCAAGGACGAGGATGTGAGGCTCGGCGCAAACAAATTCAATGAGAGGCAACCATTGGGCACTGCGGCACAGACCCGTGACTACACGGAGCCTCCGGCAACGCGTCTCTTTGAGCCGGCCGAGTTCTCATCATGGTCATTTTGGAGGGCAGGGATCGCCGAATTCTTCGCGACTTTGCTCTTCCTCTACATCTCCATCCAAACTGTGATGGGTTACAAGCATGGTGTCCCGAGTGCCAAGAACGAATGCCCTGGTGTGGGTATCCAAGGCATTGCTTGGGCATTTGGGGGCATGATCTTTGCCCTTGTCTATTGCACTGCTGGCATCTCAGGAGGGCACATCAACCCCGCGGTGACATGGGGCTTGTTTTTGGCTCGCAAGGTGTCATTGCCAAGGACATTGTACTATATCATAATGCAATGTTTGGGGGCAATATGTGGGGCGGGGATTGTGAAGGGTTTTCAACCAGATTTCTACAATAACAATGGTGGGGGTGCCAATGTGGTAAACCATGGGTACACCAAGGGTGATGGACTCGGTGCTGAGATCGTCGGAACCTTTGTGCTTGTTTACACAGTCTTCTCTGCCACGGATGCCAAGCGTAGTGCTCGTGACTCCCATGTTCCGTTGTTGGCCCCTCTTCCCATTGGTTTTGCAGTCTTCCTTGTGCATCTTGCAACCATTCCTATTACTGGAACCGGAATCAACCCCGCAAGGAGCTTAGGAGCTGCCATCATTTACAACCAGAAGCATGCATGGAATGACCATTGGATCTTTTGGGTTGGACCCTTCATTGGTGCAAGTTTGGCTTGTTTGTACCACGTTGTCGTTATCCGAGCTCTACCCTTCAAGTCTCGCGAAAGCTCCTAGAAACAAAAATCCTACTTGTTAATTAAGGTTTAATTAAGCTAGGTGTGTGAAGCTTGAGTGAAAGCATAAGAGGTTGCCCCAATGCTCCCTTATTGTAAAATCCTTCTTTGTTATTCTCTCATTGTATTATCTTCTGTAATAATCCACCACATCCTTTTTTGTCTAGTTTAATCAATTAATACTTTTTAATTAAAGATGACAGTTTTTGATTTATTGATAAAAA |
| **NAMED PLASMA MEMBRANE INTRINSIC PROTEIN 2;1 (PIP2;1):**  AGAAGGGGTGCATACGCCTCAAAATGAAACAAAAAGCAACATTTTTTTTTTACCAAATAAAAATGACATGCATACTTCACTTGCTTAGCACAAAGAAATGAAGGAAATCATAACTTTGCTGGGGTAAGGTTCCACATGTAGACAAGAATGAAGTGAAACCAGCTAGCTAATGTGTGAAAGGGATGATGGAAAAGAGTCTCAAGAGCAAAGATTCTACCTAGAGAATGCTCTAGATTCATAAGAGATAAAGATAAGAGATTTGGGTTTATGAGTGTATGTGTGTTTTTAGGTTTTGTGTTGTGTTTTTTTGTTTGTTTGTTTTTTTTTTTTTTTTAAAAGGGGTGTGGGAACTCATCAAGCTAGAATTCACACTTAATCACGATACAATATCTTTAGATGTTTGACTGGCTTCGAAAGGAGCCCATATTCTTGAAAGCTCCAGCGCGCAATATGTATTGATGGTAGCTTGCAGCAAGAGCTGCTCCAATAAAGGGACCCACCCAAAAAATCCAATGCTCATCCCAAGATTGCTTGTGGCCAAAGATGACGGCAGCTCCAAAGCTTCGAGCCGGGTTAATGCCGGTTCCAGTGATAGGTATGGTTGCTAGGTGGACCATGAACACTGCAAACCCTATGGGTAGAGGTGCAAGAACCGGGACATGGGAGTCACGTGCATTACGCTTTGGGTCAGTGGCAGAAAAGACAGTGTAGACAAGGACAAAAGTGCCAAGAATCTCCGCCGCGAGTCCGGTCCCTTTAGAGTAGTCAGAATTCACTACATTGGCACCACCACCTGATCTCAAATAGTAGGAGTGCTGGAATGACTTCACCAATCCCACCCCACATACTGCTCCTAAGCATTGTGCCACTATGTAGAAAACAGCTCTTGGAAGTGACACTTTTCGTGCCAAGAACAATCCAAAAGTCACCGCGGGGTTGATGTGCCCCCCTGAGATGCCGGCAGTGCAGTAGACGAGGATGAAGATCATGCCGCCAAAGGCCCACGAGATACCGAGCAGCCCGACACCACCACAGCTCTCGGCCTGCACTGCCCCAATCACCGTGCCCACGCACACATACAAAAAGAGCAGCGTCGCCACGAACTCCGCTATCACGGCCCGGTAGAAAGACCACAGCACAAACTCGTTGCCATCCACAAAAGGGGCTGGTGGAGGGTCCTCATAATCCTTAACTCCTTGCTCCTTCCCCATCTCTCTCTCTTACACACACACA |
| **MIZU-KUSSEL2 (MIZ2)**:  ATTTCCTGTGTCCTTATCAAGCAATCACCTTGCATAGTTGAAGTGACTCATTTTCTATAAATTATATCCTCTTGCCCCAATCTTCTTCGACTTCAAGCTTGATGCCAAAACATGGCTACACAACAAGCCATCTGACAATCCTACAAATAGAAATTCAGAATAAGATTTAAAATCAACTAGTCAATTAAAGAAACTCATATGTTTCCTGTAAAAAAGGAGAGGTTACATGGGCTGCCAAGCCTTCACAGATAACTTGTGATTCCAAATCAATTATAATGGGGCTTGTGCCTTTGAATTTCTTCCCCCCTAGCATTGAACATGGAACATAATTACGAAATTTTGTGCCCCTGCAAACTTCTAAAACCGATGGTCCATCTTAACAAGCTCTCAAGGCCTTGCCGAGTTATAGACCAACCAGAACTGGTCATACACATTTTGGAAACTTTACTAGCCAGACCACAAGATTTTATATGGTTATGCAGGCATCATAACCATCATGTAATGTGAGTGCTTTGTAAGAATGTTGTTACACACATGCATTCACCTGATAGTGTCTGCACCAGTGCCTAACTAATGCGATGGATTGTGGATACACATGCATGCAGAGGAAAAAAACTTATTGTCTCAAAGCAAGATAGCATGCTTTGTCCCAATAGACACTGCACAACAATCCATGCCTCTCTACACAACTGAAACCTAAACACATCCAGCATGATTTGCTAAGATCCTGTCTCCACATCTGTACATGCCTCAATTGATCTGACCTCTTGCGACTCAGACTCCAATTGAGGTAGTAGCTCTGCCTGTAAAGATGGGGATATATCCTGAACATGATGCCAAGTGAGTTCCCACAAGCTATCGCAACCTAGTGTGCTTCTCTGGACAAGCACTCCCCGAGCCTTCATTATCAGCAGCATATTCTTCAAAAGCTCTGGAATAAGCTCCTGAATTTTTTCACTATCTTTTCCTCTCAACTTGGCTTTCCTGTACCTGTTCATTCGGCTTAAGACAGCCAGCCAGAGTGCTCGAAACCCCGGTAGCAAAGAAAGTTGATCCAGGAACTGAAGAAAAGTTTTGGAAACCAACTTCATTGCATGATGCAGAGTGTTTTCCATGTTGCGGTACTCCTTGGGAGAGTGTCCAAGAGCAATTTCTAATAAATCATCCAGCATAACAAATATCACTTGATCAAAGCATTGCCCCCATATTAATGGTGGTAGGTGCATGCTCTCTGCAGCCGATAAGCTGCGCTGAAGTGATAGTATTGCATAATTTCTTACCTCTTCTCTTGACTCTCCACAAACCTTTCTCAATCCCTGTGCTAACCTCAGCCACATCTCTCCAAGCTCCTGTGATCTTTTCACTACCTCCTCACCCGCTGGAGCAGTTGACCAACGTATGAGGCATTTTGTAGACTCAGCCATGAGGTCCAAGGCCCTAAGAGACCTGTCATTTCCACCAACAGACACTTCTGCAAATGCTCTTGCAGCATCAAGACAAAGTACATAATTTGCCTGAGTAAGATGGGCCCCTTCAGCCATTATGAATGACAAGGCTTCAAAACCTGCTTCTGAAGCCTCCAAGTGGCGGGCTGTAATGGATAATAATGATGAAACAGTGCGCCATCCCATAGGGGATCTAATATGTTTGGCATTTGTCTTTACAAGCTGCATAACTTCCTGAGTAATCCTCTCACAGAAAGCATCAGCTACCCGTGCATCCAGCTTTAAAATCAACTGTAAAGAGCGGAGAAGCTCTTCTGCCAGATCCTCTTTGTATGGGAGTAGCCTCTGACAGATGCGTAAAAGCCCAAAAACTGCTTTCTCAACTAAAAGACAAGGCATTAGTGTTGTCTGGACAATGTTGGCTATGTGTTCATAGACTCCCTGCCAAAGGAGCATTATTCTGTCTCTATTGTTGAGAGCAACAGCAATCAATAGATCCAAACAAAAAACTGCCGTATCTTCATCATCAGGTGATCCACCAGCTTTCTGTGGTCGCCCTGCAGCCCACATGAGGGCTCTAACTAGCTGCAGCAATGACTCAGCTTGCAGAAATTTGCTCTCTGTAATGATGCTGTCAATGCGGCAAGCCTCTATGGCACGCAGAGTTCGCTGATGAGCAGCCAATTGCTGCTCAGTTGGTTGAGACCTTGGTTCGTCTGTTTCAAGAGATAACAGCTGACTAAATCGTCCCATCAACCCCTGGGACCGCTTCTTGGCTCCTGCTTGGGGTATCGCAATCAGTGTTGGGCCACCTGGGATTGGCCTTCCATGCATAGTATCACCAGCAACATCCATATCATCTCCAACATCACTAGCAACACGAGCAGGCAGAAGGCCAAGCTTGTGCAGCCGCAATATGCAGTCAAGTATATTCCTCCAGCTTGTACGTATATAATCCCCATATTTGTTAGCAATATTGAAAACTGTCACTGCAGCCATGCGAGCTTTTGTATCATCACCAAATGCTATTACGGGTTCTTCCACAGATGATGTAGGATTCAGTAATGTTGTGAATTTGCACAATGACACAACAAGGTCATCTAGCACATCCTCTAAGTGATGGCTTGATGATATCTTTGCTACTGCAAGAAACCCTTCCACACACATCCTTAAGACATCTTCATCCTCAGCATGATCAAAGACCACAGAAATGGCAGCTATGGTTGGTCCTGATATTATTGCAAACATGTCACGATCCAAAAATGGTCGTGAATCACATTTTATGTATGGTGAAGACTTTTGAGACCTATGAATCAGGCCAACCCATCTACTTGGTGTCATTTCGGTAACACCTGTCGTATTGTCGTATGTTATTTTGATCTCATTTCTAACAATGGAGTGGTACAACTCAGAGAGAAAATCCCGAGGTAGATCCTGGCCACCATTGATACTCCTGTTGTTCTTAATGAAGTCTTCTTCAGTCATCTTCTTCTTCACCTGAGAATTGTGCTGGTCAGTGTTTAACATAATGAGAGAATATGCCAACAAGAAAGCAGCATCCTTGTCAGCAAGTATTTGAGAGGTCTGTTCATAATATCTCCCTGCAAAGGCTTCTAGGACCCTGTGAATCTTTTGTGCCTCTCCAGGCAATCGGAATGTTTCCAAAAACGTTCGCATAGCTGCATCCAAGTTCATGCCTTGGAAATCAAAGGTCCTTGCAAACTCTGCCAGCACTTGCAAACAAAACTCATCTGGATCACCTAAGAAATCACCCAGCAGACTCTTGTCCAGCCCTGTGGTGTACCTAAAAAAGCAAGCAACACTCTGAGGATCGAGCTTTTCAGGCAGCAGACGGATTCCCTGCAAGAACTCAAGACCTTTCTTTGGATCTCTGTTAAAGTGATCTGCACCGATCATCAACCTCCGTTTGATGTACTTTTGCCGCTGAACAAATTTAACCCAACACTTGGGATCCTTGTAGTTCTCACATCTCAAGGTCCAAAAGGGGACATACTCTGGCACCTCACTTGGGTTAGCAGGCTCTACTACAGGAATGACAGAACCTGAAGAACCAGCCCGCTCTGCCATGCTGTGAATAACTGCAATTAGCCCTTCCAAAGCTAAAATGTGCATAGCTGACAAGGGACAATTGACAGGAAATGCACTCTTTGAAAGCAGATTTCCCAAGTCTTCAAAAATATTCCCACATGTGATATCACAGTCAAAATTAGCATACATCTCTGGCATGAATGTAGACTGTCTGCAGAAGTCTACCAAAGCTTCCATTGCCACCTCTTGTTGCTGATAGGTGGCCCCATACTTTCCTTGGGATAACCTTATGATGACACAAGAGAAAAAGGCTTCAAGCTGTAACTTCAAATGAGACCTGAGATGATGATACAAATTAAGTACAATGCTGCAAACCATTGAAAGAATGAGAGGATTCATATTTGAGAGCCCCAACTGCATAAGGAAGCGGAAAAGATCATCTTGCACAAGGGCTATCAGTTCAGGATGACAGCCGAATGATGAGCCGCCAAGCTCAACTGCTGAATTGATCAAACCCAAAGCAAAGAGTGGGACATCCTCATCAATAGCTAGCAGGTTTTGCCCAGTTACCATTCCAGAATCTACAATGTTTAAAAGGGAACACAAATAGCGGAATATTTCAACAATACCCACAATGCCATATGGCTCTATAATCAGATGAACCTTATTTCCCAAATCTTGATCAACAATTTGGCCATTTTCTTTTCTGCCTTCCAATAAACCACCACTGGATCTTGCAGAGACACCATCTGCCTTAGACCACAAAGCGTCCCCAGACTTCTCTGTGCCAGATAACAAATCAGCTTCAAAACCATTTGTGCTGACAGCACCATTGTTTGGGCCATCAACACTGTCTATATGTGTGCCATTTGCCATATCCCCGCTTTCGTTGCCAATCGTTGCAGAGCCAATGTTTGTCAATAGCTTGAGTGAAGGATCCAAATTGGGTAAATGGGCAAAGATTGACCTCACAATCTCATGCATGCTGTGCCGTGCTGTTCTTTGAAGCAGCTCTCCTTTGGTCACTGCCTGATGGACCACACGAAAGCAAGTGTTGACAACAAGACAGACATCCCTATCGCTTAACAAATTTGAAGCTGGATGCTTCATCACCACCATCAACACTTGTAGAATCTTCATGAGAACCACCTCCTCAGATGCCATATCCGTGACCTCAAATCGGCAACTGGTCACAGCATCTACTATCTCATGCATTGCCTCATCGACATGGGCGGTTTGCGAATCAAACACCTCTAAAGCCAGGATCTTGTATACAGCAGAAAGCGCAACTCCGGTGATGGGAGCTCCTGTTTCATCTGAGCGGACCACGTCAAGGAAAGGTGTAAGGTATAAAGATGGATTGATTTTGATCCAGGGTTGCTGCCAGCTGAATATGCTACGCCGGAGAGTTTTCAAAGAATACACCAGTGAATGTTCCAACTGGTCGTCACCACCCATGTAGCGACCCGCCCATCGAGCATTTCTCCTCATTACAGCCAAGACAGCTCCTATTTCTGCATTCACCATGCAAGCCAATGCACCACTGCTCCTGCTGGACTTCCTCATCTTAAAGATGTCCCAATTAAGAAAAATGAGACCCAAAAATCTTGGTCAGCTTCTCAAGCCAAAAAGGACTGAAATTTCTTGAATCTGTGTATAATTGGCAGCCCAAGAATGCCGAGTTCACAGAATTGTAGCCAGGTATACCATGAAGATTTGCTTCTGTAGTGGAAAACTAAGCTCTTCCTTCTGTGATTTCTTGAAATCCCTGAGAAATCCTTGGCCTTCAATGCAGTAGATCAAAGTCTCTGCACAATCAGGGAGACCTCTCAATTGTCCGATCCTTTCAGGGAAGCATGAAGTCTAACTTGATGCAGCAGGAAAATGGAAGGCGTGCTCCATGCCGTCAAAGACTCCCCTTCATGCTTGGATCTTGTAAATGCCTGTCATGTCAAGCTCCATAGATGAAGGCATTCCCAATGCACAGAGTACACAGAAATAGAAGCTCCAAAAACGCAGAAGAAACTCTTATTTCAATTGCACAGGGGCCAAAATGTGATCTGCGGATCAATCTATGGAAGTGCACAGCAAGAAATAATCAGACCTGGAGAAGAAGAAGAAGAAGAAGAA |
| **CONSERVED OLIGOMERIC GOLGI COMPLEX 8 (COG8)**:  TCTCGATCTCGTAGTCAGGTAGCTACACACACACACACACACGAACGCCATGATACAATTGCATGCTATCTATACGCATGCCTGTGCTTGAACGCATATGTAGCTACACATGCAGAGGCATCCATGCTTTTGCGGTTATGTTGTTGAAGAGATGGCATAAGGGAATGTTACATTTCTTCTAAGTCTCTGTATCCTCTCTTAAAAGCGGATCATTATGGACGTGCTTCCGGCATCTCTCAATAATGCCTCGCAACAAGCATATGTCTCGGAGCTTCTATCGTTCAGTTTGGACAGGTTGCACAAGGAACCTGAACTTCTACGAGTTGATTCCGAGAAAATTCGGAGACAGATGCAAGATTTGGCAGTTGGGCATTACCGAGCTTTCATCATAGCAGCTGAAGCTCTTCACTCTGTTGGGGAAGAGATGACGTCTGTAGATAAGCATCTGGAAACTCTGATCACAGAGATTCCAGAGCTTACTGGTGGCTGTAACAAGTTTATGGAATGTGGACATCAGATTTTAGAGAAGCGCAGCATGAACCAGACGCTTCTAGCAAACCACAGTGCGATTTTGGACTTGCTAGAAATTCCTCAATTAATGGACACGTGTGTCCGAAATGGGAACTACGATGAAGCTCTTGATCTAGAAGCCTTTGTCTCAAAGCTGGCAACTATGCACTCCAAGCTTCCTGTCATTCAATCATTAGTGACAGACGTCAAACATATCACTCAATCTATGCTTTCACAATTGCTGCAAAGATTACGGTCTAGTATTCAGCTGCCAGAATGTCTCAGAGTAATAGGGTATTTACGGCGTTTGGGAGTGTTCACTGAGCATGAAATGCGTCTTCAGTTCTTGAGATGCAGAGATACATGGCTTGCTGGGATTTTAGATGATTTGGATCAAGGAAATCCTTATGACTACTTGAAGAGGATAGCAGATTGCCATCGGGTACATCTTTTTGATGTTGTCACCCAGTACCGAGCAATTTTTACTGATGATACTTCAGGAAATGAGGAGAAATATGATGGAGGCCTTCTCTACAGCTGGGCAATGCATAGAATTACCTTACATTTGGCTGTACTCCAAGCTTTACTTCCAAAAATATCAGATGGAATGTCACTGCTTGAGCAATGCATGTATTGTGGCATGAGTCTCGGACGTGTTGGCATGGATTTCAGAGGCCTTTTACCTCCTTTATTTGAAATATCGGTGTACAACCTCTTTTCAAGTAACATGGCTGCTACCATTGAGAACTTTCAGCATGTGCTAGACTCCCACCGATGGATTTCTCTTCCCACAGTTGGTGTTGGCAATAGAGGGGCTGCCGATGAGAATTTGAATGACAATGCGGCTCCACCTTATGTCTTAATGGAACACCCTCCCCTTGCTGCATTTGTGAATGGTGTTCTAACAGCTTTAAATGAGCTGAGACAATGTGCACCTTTGAATCTTAAAGGTGTTTTAGCTTCAGAACTTCAGCAAGCATTGCAAGCTGTATCCGATTCGCTTCTTCGATACAGTGCAACTTGCATGCTGAGAGAAAATGAGTCGAATCTTTTCATGGCCATGTGCCGTGCTTTTATTGAGGTGGCATGTCCGTACTGCATCTCCAGCTTTCGTCGGTGTTATCCTGGTTCGAACCTGATAGATTCAAAAGATTTGCTGGAAAATCTTCGCAGGCTTGTGTTTACAGCATCATTTCCAGTTTTGCAGAACAATGGGTTTTCATCGTCTTCACCCAGGCTAGTAGTCAATGAGCATAGAGAAGGGTCAACAGACACTACTAATGTGCATGCTGTGGTGTCACTTGCAAATGGAGAAGTCCAGCCTACAAGCAACGGTTCCGAAGTCTTAGCTGGGGAGGGAGAATCACAGGATCTCGAAGATGACCATCAGCAAGTAGAGGTCAATGATGGTATACCTGCACAACAATCTCAAGCCTCGGAACCGAAGTAGTCTAGTTTGGTTTTTGTCTTTGTTCATCCTTTTCTGGACTTGACAGTGGCCTGAGGGCTTTTATTGCTGCTCAATGAGTAGTTGCAGGTGGTTGAGAATTGTGCAGCCGATGTGTGCCCTTGTTATTGCAGAAGTAACCGACAGGTTGCTGCAAATAACCCAAGATTCACTAAGCCATTCCCGTCCTTACAGTAGCTGTTCTGATAGCACGCATTCTCAAATTTTATATCAATCCACTCGCTCATTCCACCATTATATATTGAAGTTTTGTATTTTTTTTGGGGAAAAAGTTGCACTTTACGAAGAGAAACAAATTCTTGAGAAAAATAGAAATTTACTCAAGAGAGTAACAGTGTATAGTATGACACCTTTGTAATGAGGCTTGTAAAATGCGAAGAGTTGAGGGGTAATTTGAGACAATCAATTTGTTAGGGGTCTCAAGAGTTTTTGTCTCCATCTATTTGTAATGGGTTTTTAAAGTTATGCACATTGAAGGACAGTAATTATAGGGTTATACTTCCATTAATTTTGGGCTGTGCCTTTTGAAGGACACCAAAAGTGTTCCTACAAAGTTATGAAAAGCCTGTTAGAAGTTTTGTAAAGGCTAGTAAATTTAGTCATTAA |
| **TRANSPORT PROTEIN PARTICLE C 9 (TRAPPC9)**:  GAACAGTATAAAAATTGATACCTTCCTCAGCAAAACTGAGAACATAGTATAGAGCATTCCAAATGCTCATGGAGATCTAAGATGGTTTTCATTCAGCAAATTGATCCAAAATTCCATTCAACTAATGCATACAGTTAATAAAGAAGACAACAAATCTTGATTTAGTGAGAATTTGAAAATTAAATATTGTTGATGATTTAATACACACTGCAAACTTGTGATGCCTTACCCTAAACATTAACAATCGAAAGTAGGTTACAAAAGGTAATCCTCCGCCATCCCAGCTGCAAAAGAGTGGCCACCATTGTTTTGCACAATTCACACTTCTGTGCTGATTTGCACTCTTCTCATTGGCCATCATCTGTGCTGAATCCATCTAGATGGTGAATTGTATCATCCACATCCAAAACTATGCAAGGATGGTCGTCCTCCCTCCCCAGGACTGTGAAGGCCGTGATTGTCTCATTACAGCTTAGATCACCCCTTTTCTAAGAGGGTAAGGTATCCCCACAACGACTCAATTCCAGGGAAGACCTGGCTCAGATCTGAATCACGGACTTGTATTTACCCATAAATTATAATCAACCAACAGACTGTATCAGCTGCTAAAATGCCCTGATACATAGAGCCTAAATGGGGGTCCACTGCAAGTCAAAGATTGAGCCCCATCTGAAGATGATAACTTTAATGGAGAACCATGCAGCTCACTGTTTTGGTGTATGACAGCTGCTCCAAGCAGGGTGTACTCTCCTGGTACTAGAAAACATAAAGCAAAAGTATGCACAATTTTTCCTAGTGGTGGAACTTCCACTTCAACCCCATTCAGAGCACCAGCCCAAAGTACAGTTGCTTTCTCCCCACCTAAGCAATTCTCCCCTGCAACATCTCGGCATGTGACGCTGAAGCTTAATGTTACAGATTCTCTGGTATTGTTTCGCACAAGCATTTCAAGTGGGATCAAGTCATGGGTCTGGATGGTGCTCTTACGAATACCATTTGAGACAGCATCTTTCCCCTTCTTTGCAGCAGTTTCCATGACTTCAGAGTTCATCCCACAATCAGCACTGTTTTCAACTGGCTTTGGAGTTACTCGAAAACCAAAAGTAAGAGGATCAGGGCGTAGCACATCAACGGCGGAAGCCTGAAGTGCCTCTCGAAGGGCATCCTTTATAGCCAGTTCACCAGCGCTGTTTCTTCCTGAGTTCCATTTCACACATATTCTAGAGCTCAATTCCTTGATCGTTATGTTTAACTCTGCTCTTGTTTGTCTCTCTGATTTTGCTAGATCATTTACTCTATTAAAAAATGCTTTATTGAGAATTGGCAGCTTTAGTCGCTCTAAAGGTATGAGAACTCTTGCAGAGCACTCCCGATCAATTCTCCTGCTGGGATACAAGCATTCCACGCTATCCTCCAAAAGCTTCAATCCCTCTAAGCCTTCTCTAGTGCTTCGTTCACAAACAGTAATTTCAAAAACAACATCAGTAGGATTCCACAGCTCCAGCTCTAGCAGCCGCAATCCCCAACTACCTCTGTAAGGATCCATTTTTACAAGACTACCACCATCAATCGATGTCACAGGAGGGGTTGCATCGGTTGTATTAATTTGAGCTGGAACCTCCATAGACAACAATCGTGCATGTACTAAGCATAGCCCCTGAAGCACATGCATTTGCAAAGGAATGGTTAATCTTCTTCCGGGTGGAATTTTGGAGTTCTCACTCTGAACTTCTTCATCGTTCATTGAAGCTTCTCCTGCATAATGGATCACCAACAAAGGGCTGGTCGTATCCTTGACCACTCTTCCAGAGTTGCTCCCAGTATTATCCTGCTGACGTATTATCTCAGGACTCATAGAAAGTTGGCCAGCCTTTAGAATCACAGGGACTACAACACTGGCTCCAGGAAGCAGTGGAAGTGCCATTTGTAGCGCACCATGCCCCATTGAAACCACATGCTCTTGCTGCTTTCCTGTCAAGGACATGTGTGCTTCTACAGCAGGAACTGAACTTGTATTTGAAATACATATTTGAACTTCTCTTACTTCTCCTTCATACAACACAGCAGCACCCTGACCTCCGATTATTTGCGCAGTGAGGAGAGGAAGAGAAGGCATAACTGATATATTTGGACTCGATGCTTGGCGCAATTTGGGGCCTCCAGCATTTCTGAAAGGATCGGTTAAGCTCAGGCCCTTTGCCACATCTGATAATAGCACATTTGTGTCTTCAAATACGTGTTCTGTAATTACGTTAAAGCAGTGAACGATGCAGCCCCTTAGAAAAATTGGGCTCTCTTTAACTGGGGTTCCAGATAATGAGATTAACCGAGAGGAGTTTGATGGAAGAGTCACGACACAAGGATAGGGCTCAAATTCTCCAGACTGAACCGATAAGTATATGCTCTCAACAAGCACTGCAAAAGCACACGGGTTTGCAAGTTCCACTAACACTTGCACTGGCTCTCCAACAACCCAGACAATGTCCTGTTTGCTTCCAGAAGTGGAGTCATTTCCTTTAGCAAATGGAGTGTAAATAAAGGGACCCGAAGGAGCTGCTCCAGTCCACCATTCTTTTTTCCCCAGGGTTCTTGTCACTATTTCCATCTGTGAAGGTAAACTTGCGACAGAATGCAGCCTAACAAAAGGCAGACAAGGATCTGAACAGCGGGTTCCTGGTGGAAGCTGTCTAGCAGCTGTTGTTAAAGCACCAGCTAATCTGGCTTGATCACTTGGAGTGATAAGAGGATAATGGCCCCTCAATAAACGTGCTGCTGCACTCCACGCTGCAAGGGGATCACTTGTTCGTACAGCTGCTAACAGCATATCATTGAGTACATTCATTTGCAAAGTGCTCCACAGTCCATCTGCATCAGATGGGAGAAACTCCTTGATCTCATCATTGCTTCCTTGAGTATAGCTGGTTCATCTCTTTTGAGTCGGGATGAGTTACTTTGGATATTGTAAGTCTTCGCTCCCAATGCCAAGACTTGTAAAGCACTACTAGCTGACCATTGACCTTCTTGCTGGAGATATAGTTGAGCCACTTGTCTTGAGAAAAATGCAGCCTTTCTTTCATAACCTAGACACCCAAATATGCGAGCAACCTCAACATTTAGAATAAGACGGTCACTAGCATCCACAATACTTTTGGCTCCTTCCACAGCACCCATCAATAGATCTGACACTTCTTTTGCAAGCTCCTTTCTGCAAAGAAACCTTGAAAGCTTTAGTGTAGCTTCCAGCTCAAAAGCTATTGCCATGGCCCTTCTGTAGAGCTGTATAACCTCATGATAGCGAAACTTCACTTCCTCCTCAATATATGGATCTCTGTGTCCCCAATGATGTATCACTAGAGCGCACACACTCCCTTCAATTGCTCCTGCATGCCAGAACAAATCCCCTGTGAGCCGTGCTAGCTCTATTGCCGTATTATAATGTGCATTCGCATCTGAAGGAGAGCCTGCTAAGAGACAATAATCTCCAATGGTTTTCTGAGCTCTGCCTAACCTTCTTTTCTTTGCTTTACTCACCTCTTCAGTGCTTAGTGATGCTTGTGAATCCAAGGGGGTAGTTAACGTTGCACCCACAGTCTCAGCATGGAGGACCCAGCTTTCAAACTCCATCAAAAAATTTGCAGCTACGTCCTGCATAAGAGTTTGCATGTGCAACTCCAATGTTTGCCTGTCCGCAGGGGGCACAAATATAAGATGTTGCCTTTTCTTTTCCTCCTGCTCAACCTGATGTGCATCGCTTGGGAAAAATGCAAGCATGCGCTTGACAAGTGCGGAGGGATAAGCCTTGCAAATGGCAGTGAACTGTTCGTAGACGGAGACAATATCAGGAGAACAAGGGCAATGACAGAGACCGATGATGCCATGGATCTTGCGCTGAGCTTGAAAATCTTCCCAAGGGCTACGAGGGGCACCGCCTACAAGGAACTTGAACCAGAGACTGCCCGAGTTCCATGGCTGCTGAGCAAAAGGGCTCTTTTGGTGCTCTGTGTAGAAGGAGCTTACACTTGTAAGATCGACTTGCTTGTGGCTCACAACAAGAGAAATGTAGTCACGCAGGTAAGCACCTGGGATTTGGCCAACACCCACAACTACAATCCTGATCATGCACCCACTTTCCACACTCACATCGGGCTCCATCTTGCATGAAGAAGTGGGATCCTTTTTAGCTGCCAGGGTTATGCAAGTTTGAGTTTCTCAGAAAAGTTTAATCTGTAGCATGTTAACCTGCTTAGGATTCAAGCCAAGCTTTCATGGATATCTTCGTAATGGCACCTTCCATCTTGCACTTCCTTTCTGAGGTTATACAAATGAAAAGCTTAGTCTACATCTGCTATATGCAAACTAGAGTTTTATCTGCTACCTGCTGCGGTACATAAAAGCTATAGATTTAAGCCAAGCTTTCATAGATCTCTACTTTAATCAAGTTCCACGACTTGTTCGATGCAAGCCAACAGAAACAGGCAACAAAATTTTGAAAAAGTACGTCATAGAG |
| **VPS53 HOMOLOG (VPS53)**:  AAAAAAATTGCCATGACATCCCTGCACCTTGGCCGCCCAGAGTAATCTCAGTGTACTTATTTATGGTGCTTCGGCTCCAAATGACAACTGAAATTTTCTTGTTAGATCAGATTGAAAGTGCTTAGTTCTATAAAACACGGATGCGCACAAATGCACACACAAACATGATACAAAAATCGAGTCATAAACACACATTAACTGCCATAATGGACAGAGACTAAATTGCCAGTTGTAAATATGCCCTTAAATGACAAGGTGATGCTCGATTTCGTCCAGCTCACCTTGTATGCCAAACAGCACTAAATAGAAAGTGGCCCAATTACGCTTTGACAAAACAATCCTCTGAGACAGAACACCCAAGGGCCCCCCCTTGTCAAAAATGTGATGGAAGACTATCATAATCATAATGAGCACAAGCGTAAAGCAACTTTGGAATCCTGTAACAGAGGCAACCTGCAGCACTACTTGGATTCAGTGTGCAACCGCTGTCCGTTTATGTGTTGAACAGCTTTCTAAATGTGCCCTCCTTCTTTGAAGCCCCTTCTTTTGCAGACTCTGCCAAAGCAAATATTCTTTTCAAGCCTGTACTAGAAACAGCTGCAGCAGCAGCAGCAGATTGGGCCATGGCTCCCCTCCCTAATGCAGCCGCTCGTGCCATCATTGCATCCCTACTTGCAACACTGACAGCAGTGGGGGTGACCGGGGTAGGCGGCGTGGCTGGAGCTATAGCAACACTTGGGGTCACAGAGGGTAAGGGACTACTTGTAGCTGCCCCACTTGTGCCACGCCGATTGAAATAATCAAGAAGTGGTTGTTGTTCTGCCTTCTTCAAGCCCTTCAAGTCAAGCAAGCGTTGAAAATCAGTTGCAGTTCCTTCCAGCAACAAGGCACGATATGTGTCTGCAATTGACTCAACGGGTGACAAGATCACCTTTAAAAGAGCCTCAGCCTTGCCCATCTCGCGGCCAACAAATTTGTTGTAGCTTGCTGATGCAGAGTTCTGACCACCAAGGGAAGGAACTTCCAGTAATAATGTCTTCACAGCATGTGTATCCAGTAGCATCTGTTGTGCTCCCGTCTCAGAGATCCGCTTACATTTGTAGATATTGACATGAAAACGTGGGGCGAAAGATGCTGCTAGCTTGTCTAAGAAAAACTGATAATATAATGGGGACAAAAGGGCACTGATAGCAGGAACACTGCTTGAAAGTACAGCACTTATACCATTTACATATTCAGATTGATCTCCCACGCTTTCCACTGTAGCCCAAGCCATGCGCGACATTGAAGCTAGCTCAGCCTCCAGTTTGGTCTCCAAACCTTGAACTAACGTGGCTAGAGCCCTTGTTATGACTACTGAAAACTCATCCTGCACCTCTGACATGTCAACCTTGTCTGCAAACTGAAAATCAATAATCTTTGATATGTTCTCAGCCAGCTGCCCTGCTGTTTCATGACAATATTCTGCAGTGTTGACAATGTAGCAGATTACCCTTTCATCTTTGTCTGAGGTTTTGATTTGTCCGTCAGTGCCTGTTGCTGCTGCAACGATGCCAGTACCTCCCCTTGGGAGCCTAGATAGAAGCTTTGCAGCATAGGCCTTCAAGATCCTTTGAAACACCAAGAATAGATTGTACAGAGTTTGATTCCTCGTGAGAGCAGAGCAGCGCTTTAAACTCTTTTTTATAATTAAGAAGACCTGTGTGCTGCTTGAAAGGATGTTTGTTTGACTGCCTTCTTCAGCTTCCCACGATTCTGTCTGTACTAGTTTCTCTACACTTTCCATCAATGTTCTTTCCTCCAGTTCAACATATGCTGACATGTGTGGCTCAAAACAAGAGGAAATGATGCCGTAAAAGCTCAGAGGAATTGACACCGGACCTTTACTGCTATTATCCTCAGTTACACTGCTGGACTCTACATTCCTGCCAGCTTTTTCTGCAAGTTGCTTCTCATACTTCTTCCTAATTGCTGAAGCAGAGTGTTCATCTTCTCCACCTGGCTGTGCATCATCAGACTCATCCGCACTATCCACATCTTTGCTGGCAGTATGATCATTTCCTTCTCCAAACGCAGTTGCAAGATCTTTCTCAAACTCTGTCGTGCTCTTTAACGTCTGCAAGAGAGTAGCTACGTCAGGTTTTTCTTTGAGGTCATCCAAAGTTTCGGTCAGTTGCACCCTTGTAGCTTTGCAAAGCTGGATGCACAGCAGATATAGTACACGCCAAGCTGGAGGAAAGATTTTCCAAATCTCTTCATTTGTGCGCATCTGCCGTTTTATCCATGCATAACGACGTTCTACCTTGTCCAACCTTGCAAGCTTTGCTCTATTCCCTCACAAATATGGCGGTATTTTAGCAATCAGCTCCTCCCTCCCTCTCCCTTATAGATGCATCGAGCACATCAACAACCAGGCAGATGCATTGATGCATCGAGCGCATCAACAACCAAGCAAGCATCTGCCAACTGTTTCATAAGATTTCCATCCTCTTTTAAGCGTGCTGTCCCCAAGCTTGAAAAATCAGAAAACACGTGAGACTTTAGCATCTGTTTTATGCTCTTGAACTTTTCTCTTAGCTCAGAGATTTTAGGTATATCTCTGTATGCTTCGAAGTGCCCACAGAGCTGATTCACTGCCTCTAATTGGCCTGATGCTTCTTTATATAGCCGTTTGGCTGCCATGGTTTGAAGTTGATCCACAGCCGACACAAGCATTGCAAGGCGATGAAGCGCTGTAATGGTTGTGGTGATGTGCTTCTTGGCGAAGTCTAACTTTTTGATGTCACGGCAAATTTCTTGCACCATAACTTCACTTTGCTCTGCTTTCCCTTTTATTTCCTTTATTCTTTGTGTAAGCTCCTGTATGGCTTGCATTGCAGCTGCCAAGTCCTCCTTTGCTTTTGTTCCTGAAGAGCTTTGTTGGCGAACTGCAGCAAGTATCTCGGCATCAACTTGTCGAATCTTGTTTCGTAATTTTTGGATAATTGGCTCCACTGCCACCAGAGATGCTTCATTGGGGAAAGTCTGATTGATAAAATCCACAGTAGTGGTCTCCATTGAAGCAAACAATCAGAATAAGCCCTTCGCGTCTATTGAAATCTGTAGACAAATTACGGTCCCAAGTTCAAATCTTGGCATGCCCGAGCACTTGTATGTGTGAACGCGCGCGCATGTGAGCGAGAGAGAGAGAGAGAGCGAGAG |
| **MAIGO 5 (MAG5):**  CTAAACACGGGCATCCATGAGTGCACACACTGGCCACAATTAATGTAGAGTGCATGGAGTTTCAAGTTGCTTTGCTTTTGAACATATACAAAGTAAATTTTTAAAGACGGGAAAAGTGAACAGAATGAAACAAAAGAATTTACAACTGCTCAATGAGCCGTACACTACATGCTGCAAGAGCAGGTTTCCAGCGTTTTAAGAACAGGAGAGGTAAGGCATCTGTGTAACAGGCTTTCTTGACAGTAGGACACAGCTTGAATTTGATATTTTTGGGGTGAGCCCCAACTTGATGGCCTTGCACCTTTTATTTGCACAACCTATAAAAAGAATTCTGATTCCTCGACTTTTTGGCTCAGCTATACTAAGATGCCCTAAACTTGGAGTCCTATCACACATAATGGTTAAGGTATAGTGTCACGTTTGTAAATAAACAGTATCATCTCTATTCATTATCTTACATACAGATGTTGACTGACTGCCTCTATCCAAACATTTTTTCAAGATTGAATTATCCCATAGAAATTTATTTGTGGCACAGTAAACGTACAAGGATATTTCCGCCATCTGATGTTTTTCCTTCATGTAAATATTGGCCCTGTTGCCCAATAAAGTCGTTCGATTGGCATAGCGTGACATGGAGAAGTTCTGAAGCTTTCTGTAAGTGAAAATCCATTGTGTTTTGTCCGCAAAATCAGGATCTGCTGTATTTTGCATTGGTATGTACACTTTTTCAAGATTAAGAGCAGCCATTTGCCATCATTACCTCAAGGATGCCATATCTTATCTGCATCTGTTTGCTTTACGCTCTCTTGGAGCACAGAGCATATACAAATTTCTTTGGAAAATATTGCTATTCCAAAAAATCCTGGCTACAACTCAACCTCCTGCATATCTGTTAACATGCCTCCTTGTACACTGCCAGGCAATCTAGATTGCAAAGGTCCATCACTTTTACCAAAATGACTATTCTCAACAGCAACTGAAGATATTGTTGGTTCTATGATTGGTGGCACTGGCAGTGGTTGAAAATCCTGTGCAGCATACATATACCCATCCAACTTCATCCCGGTGGGAATTTTTTCCAATACTGCTTTGTTACCATTCGGCAAACCATGTTTTTGCATATAGGGAACTGCAGTAAAACTTGAATACAAGTCCTTTGGCAGTAGGGCCCCCTTCTCAGGTTGTATTTGACTGTTCTCAGTAGTAGTGCTTGCACTCATTGAATTTGAAAGGTCAGATGGACGCTCGCCAGAAGCTTCGGTGACAAAATCTGGTGTTGCTGTATGTGCAGGTATGAAAAATTGAGTTGGAGGAGGACTCATACTCCATCCTGTAGAAGGTACAAGAGGTAACTCTGCAGACTTGGCTGGTAATGATCCTCCTTTATTGAAGGTGTCTACGTATCTTGATCGTACTGCCTGAAGGCGGCCACGAGCAGAGAATTGATTGCCACTTGGTGGCAAGGGTGGAATTTCTGTGGATGAACTGAGCCTACTCCCAGCAAAGGAATCAGGACCCTCAAATTTAGCACCACCATTTGCATCATGCACGGCACTCCCACCATTGGATTTAAAGCCAGCAGTAATTGGAGGCGGTGGAAGAGCAACATTCTCCAATGTCTGTTCTGCGCCTTCCTCGATCCATTTTTTAAGATCTTTGTTGTAATAGAATTTGTTCGGGTCTCCTAAGTTTGCCTTTGGTTTAATCTTTATGAGCTCTATTGCTTTAGAAAATAACTGGCTTCCAAAACGCCCCAAATAACCAACATGACCCGGCTCAAGCTTGGTCCCTTTCGACGAACCTCCATCAGTTTCTGAACTTGTGTTAGTACTATCTTCTTCCTTCACTGGGCTCCAATTGAGGTTAGGTTCTGATACACTTCGTGGCGGTGCCTCCACTTGTTGATGATTGAATCTACTCGGACTCGCGGTCGGAGCTGTTGGGTCTAGCGTACTTGCTTTAACAAGCTTAGCTGAATTATCCACTCTTTGATCAATTGAATACCAGTCCCTCGGGTTCTTGTTAAGTGAAGGCTCAGAAGCTTGCCTTGGGGGGAGACCACCAATAATCCTATGTAGCGTACTGTCAAGTGTTCCAATAAACTTTCCAACAAGCTTTCCAGTGGCAGAATTTAAATTGTACCCACCCTGAGAATGCAAGCGTAAACGTTCCTCTAAAGCTGATGCAGATTGTCTACAAAACTCAATTTCCGGACCACGACCCACATTCTTCAAAGTCTTGGTGACAGCCTGACAATATCTACGAGCCTCTGAAACTTTTCCCGCTTCTACCAGCATATATGCGTACAATAACTTGTAAGGTTGAAAAGGCGAAACAATGAACTGTGGATTGCCCAAGGTTTTGGCATATTCATAAGTCTCTGTCCTTTGTATTGATGTGGGAGTAGCAAAAGTACGCTGCCACTTGAAATGATCCGCACCAACTAAGCACAATCTCGCGTTTTCTGAGAAGGGCTCGAAGCTGGCATCAGCAACTAGGTAACAAGTATGTGCCCCCGCAACCTCGCCATGATCCTTCCATAAGCAGTCTCCTAGATGGGTAATCACTTGTTCATCCCCATTAGTTGGATTGGCGGCAATAATTGACAAATTACCCATCCAGTCCCCAAGCATGCCTCCAGCGCTATCCTTCATAGAAGAATATAAACTCCGTGAATCAGGACCTGCAGCTACCACTGGAGAAGGCAAACTCTTTGTGGTAAAAAGCTCCGCTGTTTGGCCTCCAAATAGTAGAAATAATGTACGCAAAGGAGAGCCAGGCACAAACTGCTGTTGAGCCATTTGCAGCACTGTTTCTGCATATGCCTTCTCTCCCAAGTGCCATGCAAGAACCAATGCTGGGCCCCACATATGACCCTGCTGTGCAAGCTGAAGAGCTTCTTTTCTTTTCCCAGCTATCAACTGACTTTTCATTTCGAGCGATATCGCCTGAAGTTGATGTTCTGAGGGCACTGATTGCAAGCCAGCTGGAGATGCAAAGCTCTGATTATGAAGACTCTGACTACTTGTATTAGAAAGCAACCTTCCCAAATCAAGCTCGGGTCCCTCTTCTGACTGGGATTTAAGGTTGGTAGAACCATGCACCGACCGTAATTTACCGTAGTGCAAACAAGCAATCCTCAGCACACCCCAAAGTACACGAAGAGCTTCTGCACTTGTGCCATGAAGATCATCCGAAACGATAATGGCAATCTGATCATCAACCCATTTTAATAAATCTTTGGTTGCTATTCCGCCTCCTACTAAAGGACCTGCAAGACCTCCACGATTTAAAGAAGAAAAGTATGAAACCCCATCATTTAGTCCACTGTTTCCTGCAGCTACTGCCAGCTGATTCAGATCATGGAGCACAATTGTCTCGGGGATATTGCTGGATGATGCCTTCATTGTCACAAGTTTTCCACCAAAACCAAAAGCTACCAAGGGATGTGATGGGCGTTCAATTGTAAACTGCTTAGTTTCTGTAACCGGTCCATATATATTATGTGATTGATTAGACTGATGTGAGCTATGGAAGTTCAATGAAAACTTGTTGCCGAGTGTCCCGTGTGTCTCTGGTTGATTGTAAAGCTGTGAAACACCATTTGAATAACTTTGTAGTCCATATCCAGATCCATTGTTCTCAAATTGAAAAGACTCCTTCACCTTTTCCGTATTAGCACCAACAGAATCACTGGGGGTCGTAGCCACAGCTGATGGCTCCCATCCATGGAAAGACAAGTTCTGAGTTATGTCACCACCAAAGTCGTAGGCAACGCTGCCTTCATCTCGCAAGTAGGCATTCTTGTTTGTTTCGTGCTGATGTTCAGGCTGCATTACAAGGTTCCCTGCACCCTGCGATGTTTCAATGCTACTGCTATGGCCATGTAAGAAAGACTGATTGCCGTCAACTGTAACCTGCCGCCATTGTTGAGCTTGGTAGTCAAAATACCAGCCAGGATACTGTTCTTCCCATGGGACTTGTACCTGAGACTGTGAATCCCCAATGAAAGTCCTTTGTTCATATCCACCATCAAGAGTCGTTTGTTCACTCAAATCCAAACTCTGGCCTTCTACATAAGACCCCGATGAAGGCTCTTGCCCTGTATAAGCTGCGTGCACATGGACAACACTTCCAGAATCATCCATTGCCTTAGTAAATCCTGATGTGGATGTAGAGTTTTGCCCTAACTCCGTCTGTAATCCAGCAGACTGATTAAGGTCTGTGTGAGATGAAATTGCATTTGCTGTACTGGAAGTAGAATCCCAGCCTTCAATTTGTATCCATTGGTTACTTGTATAATCAAAATACCAACCCGGGTACATACTCTCCCAAGACTCTGGTACATTGGCCTGTTGCTGAGCCTCAAGACTGCCATTGATTGTATAAGAACCTCCACGAAGCTGCCCATCTCCCAATGAACTCTGATGCACTCCAGCCTCCGTGGACAACAGTTCATACTGTTGTGAAAAACTAGCTCCCTCTGTGTTATGATTGCCAAATGCTGCCTGATCTGCAAATGTCCTCCTCTCACCCCCTTGATCTATATCAGGTTTACCTACAGGCTGCTTGATAGTACCATTGTAGCTAAAAAACGCAGAATTGTTTGAAAATGCCTGAGATTGATGTTGGTTGGGAATGTCATAGATACCATTACCATGGGTGCCTGCAATGTCATAGCCTAGACTTACAGAAGCAGCAAAAATGGTATGCTCAGCCACATTCCCATTCTCAGCTTTCCATTCAAATGGTGAATTATTGTTGTCAAGTACACTCCCATTCTCAGCTTTCAATTCGAATGGTGAATTACTGTTGGCAGGAGGTGTCAAAATTGGCAAGTCAGCTTGAACGCCAAGCTGGTACCCAAAACTTTGATCAACTAATGCCCCTGTCCCTACATCCAGCTCTGAGAGAAAGTCATTCAAAGCATCGGGTCCTCCTCCCGGGGTATAGATTTCACTAAAACTACTCCATTGCAACTCTTTAACATTTGATTGAGGTGGAAAAGGCTTCTTGACTTGAGGGTCATCAGAGGGCACGAGATCCGATTGCAAATTAAGTGAATTAGCTGATGAAGTGGTGGTAGGCTCTGCACCTCCAGCAAAATGAGAAGGGTCAAGTTCATTGGGAGCGCTGCCATCGCAGAGAGCTAATTTGGGGTTGAAATCGTGATTTGAGGCAAGTGCTTGCAGATTGTTTGCTTCTGAGGGGGCATCAGCAAGTGTTAAAGCATCAGCTTCTGACACATTAAGCGATGCATCAAGCGAGGAAGTATCCGCCTCCAAGATGACAGTATTGAGATGGGCTACTGAATCAGCTTCTGACATGTCTTGGGTAGCCTCAACCAGACCATTTATGGTACACAGAGTCGGATTTATGGAAGGTGTTTTGTTGGGAAGAGCTATAGTTCCAGGCGTATCGTGTATCTGCGCAACATCATCGCTCATGCTTAGCTTGGACAAAGCCTCCCCCAAGCCCCCCTCTTCTTTGTAGCAATTCTGATGCAAGCCTTCTCCCTGCCCAAAATCGTGGGCAAGCTGATCAAAGAAATCCACATCCTCTCCTTCATTCGTGTGCAGAGCCAGCGATGGCCCTGCCAGAGCCATGGTGAGCTTAGCTAACCAGAGGAGGAGGAGAGATACAAGAAACTACACACCCCTGTGCGTTTGTAGCTTTGATCTCTGCCAATGGGAGGCGAGAACATGGAAGAAGAAAAATGCGATGCAGAAAGCATCACATCAAAAAATCCTCGTCCGAAGGCAAAGCTCGAAGCTACCTGTGTGTGTAGGTTGGTCTGCGTGGGTGTTAATGTGTGGAAACACATGAGAGAGAGAGAGAGAG |
| **PROTEIN TRANSPORT SEC23 G (SEC23G):**  GAGAGAGAGAGAGAGAGAGTTGAACGATGCGAGGCAACATGAGTTGAGAGGGCGGAGCGATGGACTTCTCGGAGCTGGAGGTGTCAGAGGGCTTGCGATGGACGTGGAACGCTTGGCCCTGCTCGCGCAAAGAAGCAGAGCAGCTGGTGATCCCTCTTGCCATAATGTGCTGCCCACTCTCCCCCATCCCCGATCTCGCCCTTCTCCCCTACGCGCCGCTACCCTGCTCTTCCTGCCACGCCCTCCTCAACCCGTATGCCCGGCTTGATGCTGCCTCCAACCTGTGGACATGCCCTTTCTGTTCCCGCCTCAACTCTCTGCCCCCCTCCTTCCACCCCCGTGATCATCAACATAGCCTCCCCGCTGAGCTCTTTCCCACTCACACTTGCGTTGAGTATCTTCTGCCCCGCTCCACCGACCACTATGCCATCACCTACCCGCTTCATCAGCACCTCCCAGCAGCCCCTGCATTCCTCTTCTTGCTCGACACCAGTGTTCCTGCAGAAGATCTGACTGCCTTAAAGGTGGCTATCTTACACACTCTCAGCCTCCTACCAGAGCATGCATTAGTGGGGCTCGTCTCCTTTGGAAGGCAGGTTCATGTTCACGATCTCAGCTTCACTCATCATTGCATGAAGGCCACTGTCTTTCATGGGGAGAGAGAGCTGCCTTTTGACCGGATTCAAGAGCAACTTGGGGTTGCCTTCAAGTCTCGGAAACATCCAAGCATGAAGCAAGGGGAGATGAATAACATTATTGCTCCCTTTTTGGATTGTGAATTCAATATTACAGCTATTCTAGATGAGCTACAGCCTGATTTGCAAGATTTCAAAGGAAGGCCTCAAAGAGCAACTGGAGCTGCTTTGGCTGTAGCAGTTTCTTTGCTGATGGGTTGTGTATCAAGTGCTGGATCTCGTATTCTGCTCTTTGTCGGGGGCCCTGCAACAATAGGACCAGGAAAGGTAGTAGGTACAAATTTTGAAGAGAGCATGCGTACTCATCGGGATCTTGTGAACGATAGAACTCACCATTCCAAAAAGGCTGAAAGTTTCTATAAAGGCATTGAAGGCATTTTAACCACCAATGGATTGGTCTTGGACATGTTTGCTTGTTCCTTGGATCAGGTTGGTATTCACGAGGTCAAGTCAGCAGTCGAAGCCTCTGGTGGACTTCTTGTTATGGCTGAGACTTTCAGTTCACATGAATTCAGAGCATCCTTACAACGGCTTTTTGCACGTGATCCAGATGGCCATTTGAAAATGTGTTTCGATGCAACAGTTAAGGTGATAGCTACTCAAAAAGTAAAGGTTTGTGGAGCTCTTGGGCCCTGCTCATCTTTGAGTAACAAGACCAGCTTGGTCAGTAACACTCAAATAGGTATTGGAGGAACAAATACATGGAAACTGTGCACTTTGACTGAGAAAACTCATGTGGCTTTCTTTTTTGAAGTGTGTAGTCAATTGGCAAATGCTTCACAACCTGGAACTGCTTTTATACTTCAGTTCATAACCAAATATCGAAGGAGTAATGGGCAGATGCGTGTCCGTGTTACCACCACAGCGAGGAGGTGGGTTGATGGCTCTCAAGTCGAACAACTTGTTGCCGGGTTTGATCAGGAAGCAGCTGCTGCAATCATTTCTAGACTTGGACTACATAAGGTGGTGCGGGAGGATGTTGCGGAAGTTATAACATGGCTTGATAATCTACTTATTAGGTTTGCATCCAAGTTTGGGGATTATAATAAGGAAGACCCTGAATCATTTCGGCTGTCTTCCAACCTTTCCCTGTTTCCCCAACTTATATTTTACCTGCGGCGTTCACAGTTTCTTCAAGTGAGTCGTAATACACCAGATGAAACTGCTTTTTTCAGGTTGATGCTTAATCAAGAAGGTGTGGTTGGAACTGTCATTATGATTCAGCCCACTCTATTTTCCTATACTCTTGATGGGCCTCCAGTGCCAGTCTTACTTGATATAAGCTCCATCAAAGCCAATTCTATCCTCCTCTTTGATTCTTTTTTCTGCATCGTGGTCCATTACGGATCAACAATTGCTCAATGGAGGAAACTGGAGTACCACAAAGACCCGTGCCATGAAAATTTCAAGAAGCTGCTAGAAGCTCCCGTGATCGATGCACAAGCACTTCTGGCTGAGAGAAATCCCATGCCTAGGTTTATCGAATGCAATCAGCATGGTAGTCAAGCACGATTTCTTCTAGCAAAGCTGAACCCATCTGTCACACACAGAAGTGAACATAGGGGAGATTCTGAGTTCATTTTCACAGACGATGTAAGCTTACAAGTTTTTATTGCTCATTTGCAAGAACTTGCAGTGAAGGATGATTACCTGTAAATATCTTATGCCCTTGCTCAATCATTTATCCCAACCAATGTCATTGCTTTTTTTCTGTAAGGTGTATACCCACGTGGTGCAACGTTTGTGAGTAAGTTGTATTCGTGTCAAA |
| **NUCLEOPORIN 155 (NUP155)**:  CTAAAAATTGTAACAAAGAGTAGATTGTGCAAAACAGGGAAATGCGGGTAAGTCATTAAGGACAGCAAAAGACGCAAAAAATAAATCTAGAGAGTGGATGGATATAGCAAAATGGTTGAAAGGAGGCAATCAACAACAAGAGACAATGTAGCATCTGCAGATTTAGAGTTAGAGAAAGAAATGACGTGGATGTCGGAAAAAATGCTGAATCCACTTTAGGAGCACGCGTAACATCGTGAATGTGCTTACAAAAGAAAATGAAATAGCTTCGTTTCGAGAAAAGAAAATGAAATAGCTGCCTGTGTTTCTCGAAACGAAGCTTGCCTTCCCAGGTTAACATACTCTTTGAACTCAAGAACTCTACTAACTAAGAATTCATGATTCTGTGAGTACAACTAATTTCTTTCTCCTCTTTACTTTGTTCCTTGTCCTCGCCTTTCAGATCTTTTAGCTGGTCCAGCACTGGGAGTTCACTTTTTGTGGCAGCGGCTCTAATGCTTTCCTTCCTTTTACAGCCTTTCTTCAGCTTTTTCTCATTCATTGCCGCAGATTCAGTTCACTATGGTCACCAATGTCCATCTTGCAAAAACTATTTCTAACCTTTTAGTGCCAACTGCCATTATGGTAGTCAAAAGTAGCTCGCATTCTTCCGTGTGCACAAATTGAAGGGCCCTCTTAACGGCCTAGCCAGAATACATCAATCCATTCACAAGTCCTCATTACTTCAACTGGCCTGTTCACCAAGAGCTCGACTTAATCAACCTTCTTGTCCACCTCGTAAAAGCTGTAGTAACTCTTCGATTAGGCTTGTTCAGAGAAAGATGAGAGGGAGTTGACGCCACACTAAGCACTCGGGTGATCTTGCTCAATAGGCCCTGAGTACGCCTCCCTAAATAGCAATATCAACTCAACCTTAAAAATCTGGGTTCCAATAGAAGGATGGACATCCTTGGCACAGTGATCTCCTAATTGTGTGCCGATGCCACGAAGGTGTCAAATCGAAGGACCTTTTGACTGTGGCCTCAATAAGAAGAAGATCCCATCAGAATTTCTTCCAGCTCCCGAAAGCCTTGATACAGAGGTTCAACCATGTTAGGTGGAAGCGAAAGTCTGCGAACCTCCGTCATATATCTGTTGGCAGCCGTAGTAAGTTTGTCTTTGACTCCTTGGTTTATGGAAGCCATTTGTCCAAAACTTAGTGCTCCTCTGAATGCCAAAGCAGTGGAACCTACTGTACTACCACAGACAGATGAGGACCATTCTCTCATAGCTGTAAGAACAGACCGCAACATACGCAGCCGCAGAAGAGGTGAAGGTACAGCAGCTCCTGTAGCCAGAAGACGATCATACACCCTTTGCACAAGCTCAGCTGCATCCTTGCAGGCAGCAATAAGGGCCCTTGGAACATCCTCATCTCCAACTGCTTCTTTACCAGAAGCCACACGGTCCTGAGCAGATTTTTCTAGATGCAGACAAATTGTGTCAAGAGGCAAACTGCCACCATCACCTGGAAAGAACCGAGGGCCAACTCGTCTCAGCACACTGCAGGCTTCTCCAACTCCACCAACCATTAGAGCTTGATCTATGAGCCTGGCCCATGTATCTTTCATAACATTGTTCTCAGAGTCCCGAGCATAATTCGAAAAGTGCAAGATGTCTAAGCATACCTCCCACATTTCAAAGGGCACAGCATAATCATTGTAAAGTTGTGAGATACTCTTTAAATCTCGCCCAAGTTCCTCCAGCTTTTCTTTGGCTGCACCAAGAACAACCTCTTCTGCAAGAAGATTCTTGCTAGGAAAAGATTCCGTCATAACCGTGTCACCTGGAACAGTTCCATGTGCTGCTTCACTTCTGGCAATCAAAAGCTCCAGTTCATCTTTAATTTTTAACTGGAAGCGCAATACGGCAAGCTTCCCTTCCAAAAGCTCTAATAAACCACCATCAACAACCTCAGTACTTGAGCTTGTTGTCCCACTTCCTATGGTTGCATTCTTTGCTTGCAAAACGGCACTGCTGAGGTACTGAAACCTCTGCTCTAGGGTCAAAACACCACCTCCATCCACCTGTCTTCTCTCTGCCAGTCGTAAAAGCACGTGGGCAGCAACAACATGCTGTCTGTGATGGACATAATAGCGTGCCAAAAGTTCCAGATATTTAGCCTCTTCTTCTGTCACTGGTTGCCTGGAATGGTTAACAGAAGATGGTGCAGACGGCATTGCAAGCTTCTTTCCACCTAATCCTGTCTTCATCATTTGCTTGCTACCAGCAGTTTGTAAGAAACAAACCAAATCTGGACCAGCAAGTTCTAGAAGCTCAGACTCTAAACCTATGTCAATCATTGTTTGATAAAGGAACTCATGGAAGGCTCGATCAGGCCACCTCACGCTCAGCTGAACAACCTGCCTTATGTACTTCTCCCTTAATGATTTGTCCAAAACAGGATGCTGCAAGGTCCCAAATCCAGACCGAAAACCGGATTGCGAGCCTTCTTCTTTTAGATGCCTTAGAGCATTCCCAACTATTTCATAGCATTGTTGACGAGCAAGAAGAGTCATTTCACGCCTTTTCTCATCAATATGATCATTGATAGCATCCTCGTTGGGATCCACAGCCTTTGCTTTTCGTAAAGGCAATTCAACGACAGCTTCATAAAACCTGATTTCTTCAAATCTCTGACAAACACTCAGAAGATCTGCCGATTCTGGAACCTTTCCAAGTAATGCTAAGGCCTCTCTTGCCAATCTCTCTCTTTGTTCTGCATCAGTAGCTTCTCTAGCCTTCTTCAAACACTCTACCGCTTGGTAAAACGTGTAGTCGGTCTCCCGATAAAAGCTTGGGCAGCCATCTCTCAGTTTCATGCTGATGTCATCCACTGAGCCTTGACCATTCAACCCTATGTAGTACTCCATGAGTGCTGCTACAAGACGGGTAGCAATTTGCTCTCCATCTTCTGACGAGCAGACCAGTTGGTGAAAAGTAAGATGAACCAGCTTGTGCCGCAGATTAACATCGAACAGCTGAGCTAACCGTGCCACATGGTGCTGACAAAGCATTTGCAGCAGCAAAAGTGCCTCTCCAGACCTCCGAAGAAGCCTGCGAATAAGCTCCATACTCCTCACCTCCATGACCGAAAGTTCTGCAGAGCTGTAAGGGACCCTCTGCCTTTTCTGTGTCAAAGGCTGTGAGCTAATTCCTTGAGGTGCATCAAAGAGATTCTTAGAAACCGAATCCAAACTGCTGTTTCCATAAAAACTTGGAAGGTCCCCAACCCCAAAAATCCGTCCATATGGTCCTCTTCGTTGATTTCTTCTTGCTCTGAGAAACTGTTCTAGCCCCCTTAACTTATCTTCTAAGGCTTGCATGGCTTCTATTGATAGCCTGCAGACGATAATGCCCCCATCCTTATCCTCAACACTAGATTCACCTTTGAGGACCATGACAGGGAGCTCCCAAATTGGCCAAAGCAATCTTGCAGTACACAAGCAAAGACCTTCGTGCGCTCCAGAATAGACAGGTGTGGCTTCTTGCACAACTTGCCCCATGTTGAATCCCATGGCTGGTGATGTGATTGGACTAGTGCTGGGACCGCTTCCCTGCATCTGAGGAACGCCTACAAGCCTGGGATCTTCAAAAGCTTCAGCAGCCCTCTCGACAACAGTTGATGGCACTATCTTTCCTTCCATGGGAGTTAGTCTTGCTGCAAGAAGTAGGCACATAGCTGCAGCCTCACCAGCTCCATATCGATGAAAGAAATCTTCCAACAAAGAATGTGACATCCTATTGTCCAGAATCTTTTGCAACACATCCACAGGTCTGTTAAATACAACTTCCATCAATCCCATATTTGTGAAGATAACAGACCTCCTCCGAGGCAAAGCATGTTGTAAAGCAAGCTCTCCACGAGCCCAAAGCCTTTTTGCTCTAGTAATTTCGCCTTCCATGCTAGTACCGTCACCAGCATCCCAAACAGCAGCTTCAGCTGTTGTTATATACTCTGGAGCTGGGAGAGAATCAGTAATGGCTAAGGTTCTTCCATCAACTCCTAACATAGAAACCGTCTCTCTCAGAGCCCTATAGCCTCCCCCAGTTGAAGCAGAGCTTAGAGTAAAACCCCCTGATGGGGTTGTCAAGTCTGTTGTTACGAGCAATAACCTTGACATGGCTGCAGGAGAGGAATCAGAAAGGAAGAGGAAACCACTAGAATAACAAGCAGATTCTACTTTTAAAGTAAGGCTTTCAGGTTGAGGACGACCGCTTAATGCTAGGCTTCCAAAAGATATGACTCCACCAGCTGCAACTGAAGGAGCTGGCCTGCTCATGACAAGCTTCAATGTAGCCGGCCTCAATGAGCTTCCAGTAGACCCATTGAGCCCTCTGGTTCCAACTGAAGAGAAAGTAGACAGATACATCCTCCGACCATCAGATGTAACCGCCACAAGATGTAGAAACTTTGATTCTGCTGAAGATATGGTAGAAATTGAAACAATCGGAGATTTATGCACCCGGGATGCAGCTCGTCTTCCAGACGGACGGCCACTTCCCAATCGTCCATCTCTTTGATCGCCTAGATTTCTCTCCTCTGCGACCTTTTTTAGGGAGCTGTCTCCAACTTTCCCCATATCAAAAACCTGTATCTTTGATTCATGAGTGCGTGTGTAAAGGATGTTTCTCTCGTTATCAACCACCATCTCTACCACTGGATCCACCGCTCCAAAGGTGAATGAGTTGGGCAAAACCCACCTTGATAACAGGCTGCCCAAGCCACTGGTATGACAGACTTTTCGGCATCGGCTTTTCCAACCTGCACCTGAACTGTAGAGTAGCTCATATATATGGCCATCTCTGCCTGCGAGGAAAATACGACCTTGATCTGTACTCTGTATGCAGGTCATTGTAACTCCATCTGAAGGGATTGTATACTCATGTAACAGTTGCATAGAGAGCTCGGCATATGGATCAGAGCCATCTCCACTTCCGGAACAGCAGACACCAAGTAATACAACCTCAACGGGAGTAGCTAATATCAAAAGGTGCTGAATGGCCTCAACAAATATGCCAGGCTTAGCTTTGGCAAGCCCAACTGCACATAAAGCTTGTTCCTCTCCACTGTACTCTGGACAAAGCCCATCCCACTTGTCAAATCTCCACAGAAACAGGCTGTTGTCAACGGTTGCCCATGCTCGCCGGATGCTAGGAAAAACACCACACAAGGCCGTCCCCTGGCCACCAGCTGCATTATATCTCTCAATTAGCACAGGAGGCAGCTCTCTGTTGCTTGCCACATCAACAACTGATGGCCACTCTTTGGGAGGAGAAGAGTAAGGGTTGCTGGAGTAGCGGGCAGCGTCGAGCACCTCATAAAGATCTGGAGATGCCAAGTCGCGCGAAATGGTCTCTGTGATGAGGCGCCCTGCCGCAGCCACATCAGGGCTGATGGTTTCATCGTCCCAGCTCATATTAAAGCGCTTGCGCGCACACACAGTGCTGAAGTGGGCTTCTTCTACAGCTTCTATTAATCTGCGTCTGCGGGTCAGCTCTCTCTCTCTCTCTCTCT |
| **NUCLEOPORIN 160 (NUP160)**:  GCAAATTTTTGAACTCTGTGAAGTGGGGTTTGGCGCAATTGTGGGCGAAGAGTAGCGCGTCATTCAGAAGCTGAAAAGAGCAAGATGCTACACAGAACTTTAGCAGGACGCTTTTCTTAGAGTACAAGGGGAGCGAGCACACATAGAACACAAATATACGCATTTTGAGCTTGAGGGTGTCCCACACAGGAAGCCATGGAGGTGCCTGTGGTAGGCAGTGAGCAAATGAGATGGGCACGCATCACAGTGCCCACCCAATTGCCCCCCTCAGAGCCTTGCTGCCCCCTCTCCCCCGACATGGCTGGAACTGTCTCTTTTTGTTCCCCATCTCTCCGCTTCACTATCTGGCGAGTACATAAATCATCTCCTGCTACTTTGGAGCTTTTTGAGCTGGCAGATAATGAAGCTCATATGTCAGGCCTACAACTTGTGTTCCACGAGCCATTGTCTCCATATATTGCTATTTACCCTGAGCAGGCTCAAATGAACTATGAGGAGGGGAATCTTTTCATTTGTGTTGTCACCATCTCGGGGGTTGTGTACATATTGAAAATAAGAGCTTTTCACAAGTACAGAAGTGTCTCAGCTGTCACAAAGTCGGACATGTTTCAGTTTTCCCTTGTAAGTGAACTTGCACGTCTCGATGAGATCACTTCCTTTGCTGGATTAGGAGGTAGTATCTGTGCTGGTGGGAAAAGTGGCTCCATTCTTTGTTACCCTTTTGAACATTTCAACATGGAAACCAAAGAACACTGCTTTGAGCTAAAAGACTCTGATGCTATTCTGGGGCGCTTGTGGGGATTAGTGGCGAGGGTTAAAAGTGCTGGTCCACTTCAGAGCCTGATCATGCAACTACATAAAGAAAAGACATTACTTTTTGCACTACATGAAGATGGAACATTTAGGTTATGGGATCTTCATGATCGATCTCGTCTTCTGAATTTTAGTTTGTACAAAGGAGATTTTACAGACTATATCCCAAAGATGATGTGGGTTCAGGAGCAGGATATACGTAATGGGTCTAGGCAAATTGCTTTCCTTTTCCAAAAGAAGGGGGCAACTGTGGAAAACTCAGTTCACATTTATGACTTGCAACTTGATCAAGTCGATGGAGCAGCTGGTCAAGCTACACTGCATTTCCAATTACAAACTCCTGACATCCAGGGGACCGTGCTGGACCTGAAGTTGCTCTCGGATAGCTTTTGGAAACTTGAAATGGTGGATGGACAGTTCAGCCTCAAGTGCTATGCAACAAAGAGGGAAGAGCTGCTAGAATCATGTGAACTTCTGGAGGCTGAATTGGAAGATCAGCTTTTTCAAAGCCCTGATAATGATTGGGAGGATCTTTTTCTTTTTCAACAAAGCATCAACACAAGTGCAAAGACTGAGTTGCGGCTTCCCATATCAGAACTGTTTTTCTCAAGAATCTTGCAGTCTGGAGTTTACCAACAACACACTCTTCGGAAAGTGTTGGAAAAATATAAAAGAAATATTTCCGAGACAGATTTTGTAATGTTTACAAGGGAAGGAATACGAAAGGAGATCTTGGCAGTTATAGAGTCAGAAAACACGGGGGATGACAAGATGGACCGCCTCGTGCAATGGAAATCCTTTTGTAGGGATTATCTCACATCATGGAAACACAACAACACACCATATGCTTTGATGCTTGATTATCACACAGGAAACATTGGCCTAATCAGGCGGCAGTCTCTATCTGTTAAGCGGTCTTTAAGCAACTTTGAAAAAATGTATTCAGGAGATTTCAATGAAGGCGGTTTTATGGACTTGATTTTTAAATGTACTTCAACCATTGTCAGACAGTTGGGCAAGCTCCCTTGTTCAGCTTTTGGCCAAGTGTTAATAGGGAACAAACACATCTCCTTGTCTCACATCTTTTCAGTATTTGTGCACATGTTGGATGTGGGTTATGATCAATCTACTATCAACAATGGAACTACTCATATTGGTGTGGATGTTGGGAGGAAAAAAACATTCGAGTATCGCCAGGGGCACCGGAAGTTTGAGCTACAGCTGATTCTTGATTTGCAGAACCTTAGAGACTTTGCAGGCAGCTGGGGTCTTGTCCTAGACAACATAGAGAAATATATCACTCAACTTACACAAGATACAAGGTTCTTTCAAAAAAAGAATTATCCTGAAGGTTTGGAATATGGAGTAATTAGCAAAAGGATGGTATTAAAATCAACATCCCAGCTCTCATGGACACACTTTGAAGCTGCCAAACATCTTTTTTTTTTACTTGGCTACCTTATCAAGATCAAAGGGCAGGTGGGTATCAGCAGTATCGAGGTTTCAAGAATACAGTTGGATCTTGTCGTGCAGCTCAAGAGAATACTTTTGCGCAGTCTTCTGGTTTACTGGTTGAGTACTAATTTTGCAGAAATAGCACCTCCTGAGGACTTCAGCTTACACTTATCAACTTTGCGCCTAGATAGTGTGGTCACTAACAAGCCTAACAATCAACACCTTGGAGTACAAGAGACGACTTTAGCAGAAATACTATTGTCTGCATGCTCAAAGAGTCTTTCAAAAGGGCCATTTCTAAGATCCAAAGGATTTTTAAATTCTGATTATCTTTTGTATGCTACAAAGAGTTTTACTTCCTGGCTGATGTGGGGGGAGGATAGTGATCAAAGCGAATCTCTCTCCAGTCGTTCTGTTACTCTGGCTGCAATGCTGCTACAACATGGGCAGTTTACAGCTTTGCAGGACTTTTTACAACTTGTGGATGCTATGTGCAATGAACTGGAATTGCATGAAGTCAAAAGCTTAAAGGGGGAATGGTGTGTGCGTCTCCATCTTCTGGGTTGTGGTTTACTTGGACAGACTCAAAGTAGTCTCAAAGAACCTGCAATCAAAAGTAGAGTGGAGAAATCTGTTCATTGCTTTTTCAGAGTAGCATCTGTGGTGGGGCAGGATAGGGAAGACCTTCAGGCACTGCTTTTGAAAGTTGGAATGGAGACGAGCTTTCTAGTTCATGGGGCCATTTCTTCCTGGAAATTTCATTACTATGAATGGGTCATGCAGATATTTGAGCAGAATCATCAACTTGAAGGTGCTTGCCAATTTGCTCATGCAGCTCTGCAGGAAGTGGATGAAGCAGCAAAAAGTAACATCATAGAAACCACACTTGAAATGTCAACTGCACTGTTAACCATTAAAGGACGTCTATGGGCCAATGTTTTCAAGTTTTCTTTAGATAAAAAGAAGTTTAAGGAGGCTTATTGCGCCATCATGTCAAACCCTGACAAAGAGAGCAAATATGTCTGCTTACGAAGGTTCCTCATTGTCTTGTGTGAACAAAAAGCAGCAGAGGTCCTGTGTGGCTCAGAGCTACCATATGCAGGGATGCTTGAAAGAATAGAACAAGAGCTTTTGTTGAAGGCACACCACTCGGACCTAAGTGCCAATCCAAATCCATTCAAGCTTCTGTACTCATTCCACATGCAACGGAGCAATTGGAGACGTGCAGCTCTCTACATGTATCTGTATTCTGTTCGCATGAAAGATATAGGTCTAACAGAGGCTGGTTTGTCAGAGAAGTTTGTTCTGCAAGAGCAGATTAACAGTCTTGCTGCAGCTATCAATGCTCTGCACCTGGTTGACTCGATGTATGCATGGCTCGACTTGGAGTCAGATATTTTTGGTGGTATAAGTGGCAGGCCATCTTCCAAGCGCATTCGTACTCATGCTAGTAACGATGCTGGCTTTTCGACGCAAAGGAGCGAAGCCTCACATGTTGATCTTAAATATCTACAGAAGGAGTATACACTTACACTGGCCCAATTGCTGCTGATTGAGGCTGGGGTGCAGCTGAATGTGCATGGAGGCGATTTGTCACTGGAAAATGTGCTTGTTCTACTTGTCCAGTCCGGGCTCTACGAAATGGCGTTTTATTTTCTTTTCCAGTTCTGGAAAGACTCGACTCTTAAAAGCGAGCTGGAGCGGATATTTCGAATAATGGCAGAAAGTTGGTGCATGCGCCAACAAGACAACAGTAGTCAAAAGCCATTGTCAAGCCATATGTCACTTTTAGAACCTAATAGGAAGTTGCTGTCATTACCGTCTTCAGAAGCAGAGGTCCCATTTGAAACACCAAAGAATTCTTTAGATCTTCTTACCAAAGACGCGATGAGCAACACAACATGCAAATCCTTACAATTTTGCCTTGATAAGTACGTGAAATTGCATCCCCATTTACTTGTTGTCGTGGCAGAGACAATGTTGAATATTGACAGGTTGATAGAGCTTCCTGTCTGGCTCGTGGATATGCTTAAGGGTGGAAGACAAGCTGGAGAGGAAGGTATGAGTCTGGCAGGCGCAAATCCAAGTGCTCTACTTCGTATCTACTTGGACTTTGGTCGGGTTACAGAAGCTGCTATGCTGTTTTTGGACTATGTGAAGGCATGGTCAAACCTGTCACCTGCGGATGTAATCAAGCGCAAGAAGATGTGTGGAGTGTGGTTCCCTTACACACTAGTAGATCGCTTGAAAGCTTGTCTTTCGGAGTTAAGTAAATCTGAGCAGGTTGAAAGCCTTGAGCACTTGCTCGAGAGCAGTTTGTCAAGGCATTTTGAGCAGGTTCATACGGATTCAAGTGATGTGAAGTCATTGGTGCAAAGCTGAGTCCAGTTTCTTTTTGTAAAAGCAAGTGATTACATATGGTCGGTGGGATGATTCATGATCCCTTCTCTTCTCAAATCAGAGGCAACTGTTCTGTGATGTATTAGCTTCCTGTAAAATTTGCATTTTTAAATGATGTATTATTTGGCATATCAGAGGTAACTGTTGTGTGATGTTCCTAGTCCTAGCTTTTCTTCCAGTGCAAGCTACAACACCTAAGTGCATCTGTAAAGAGGGTTAGTTTAGAGGGGAATTATCATGCCTTTTGTGAAATTGAATGTATGTTTGAATATGCACTTGAAATCATTTATGTTGAGCTTTGAAAATGTTCTCTCTTTT |
| **TRANSLOCON AT THE INNER ENVELOPE MEMBRANE OF CHLOROPLASTS 100 (TIC100)**:  GAATCTAGAACCTCAGGAATTATTTAAAAAAAATCTCACCTGTAGTGCACATCACTGCCACCATTAAAACCAGACCATCGATAAACAGATTGGTACACTGTTACAATCTAGAAGGGAGAGAAATGTGAATTGAAGAGGTGATATCTCTCAGCCGACACTTTCGTGCGCATTTTATATGTAGGCACAAGATTATTTCAATGCTTTGCACTTAGTGCCTACCAGTGCATCAATTAAAGGCTATTTAAAAGCCCGGAAATGGGAAGGCGCCTTTTAACGCCTTCTAGGATTTGTGATGAAATACTAACAAGATCTATTAGAGAGCCAACAAAAAATTGCCCTTGTAGAGTGTGGAATACAATCACGAGGGCATTTTATGAATCAAATGGCCAGGAGCTCACATAGATAAATATGTTTTTCAAGCTGTTCATACTACTGCTTAACAAGCCGTGATAGCTTCCAACATAGACAGCTACCATTAAAATCGAAAAAGGCCTGATTTTCATCTCTCCTATACCCTTCCAAACTACTCAAAATTGATGAATTCAGATAAAAAGGCTGAGATCATTGCTCTACTGGGAGTGCCATAGAGAGAAACCCAAACACTGGCTTCGTCCAGATGGTATCCATAGTGCTTTGTTGTTGTGACTTGCTGCCTTGTTTGCTTGAATAGTGTGCAGCACCAATACCTCCAGGCTTTTTAAGAAAACGTACTCGCCTTCGCTTGCTACATTTGGTGCCGCATACCATTTTGCAAGCAGATTTCTGAGACACACCGGATACTCTCAACCTGAGATCATCAGAATTGCATGAAGGCCTTACATGTAAAGTAGTCTTCTGTCTTGGGGTGGTAAGAACCGACTGATGTTCGCTACCCATATTGCCCAAGCGGAATCGGTGATGCCACAAGTCAGCTACTACTCTACCTACTTTAGATTTGAAAGCTTCACCTACAGCCATTCGTGGTCCCAATGTCAGAGATGCAAAGGCTGTGGGGAATATGGAGCCACGTTCTTTGGACATGTGCTTGATATCCTTCAATCCTGACGGATCATCTTCGATTCCGACAAATGCCACTTTCCCAAAACTTCTTGGCTTCTTGTCATCATCATTATCCTCCTGATCCTCCTGAGAGGTATTTGCTTTATCCTCTCTGCTTGCTTCAGCCTCTTTGCTTTCATCGTCATCCACCTCTGGACTTTTGGCCTCATCTTCTTCATGCTGCTCTGGAAAAGACTCATCTGACTGGTTTTTATCAACAGCCTCGTCTTTGGGAGCAGATTTGCCCCTCCTTTCTGCACGAAGCTTTTCTCTTTCTATCTGAAAAGCTAGATTCCGCTCTGCCCTTTTCAATTTTCGTCGAAATTCCATAGCTTGGTCCTCCTCTTTCCACTTAACTTTTAATTCCTCTCTCTTCTTCTCCAGATCCTTCCGAGAGTGCTCACTGGATTTAGCCCATGTTTCTTTGAGCTTCTGGAAAAGATTCTTCTTTTTGCTTCCAGCATCGTCTGTCTCATCTTTTCCATCTTTCATATATTCATCAAAACCCTGTGGTAGTGGTATGATAGCTTCTGGAATCACCTTACCATTTTCAGTTATGGGTTGAAAAAAGAAGCGAAGCTGCCCTTTAGCATCAGTTATCCAATTGATAATCCGCCCAGTGGGAACATGAAGAAGAACTTCTCCTTGAAGGTCTTCTGAGGCCCTTTCCACATTTTCTGGGTTGAGTTCAAGCATTGCTGACGGTGTGTTTCCCAAAAGGACAAACTCATCCTCTTGTGACCAAATATACTCCAATTCTGGTGGCATAGGAATCACAAAGGGTGCCTTCATGAAAGAGTTTAACCACATTTCTCTCTCATTGTCTAAATCTTCGACATATACTTTCCAATCTTCAGGAACCTCATAGTATGCATTTATAAATCCGGGTGCCATCCATAGGTCCTCCTCTTCATACATGTAAGGATGTGAGGGATCACAAAAAGGGCCCTTTACTTGCCGTACCATTCCATCTGGTTTATTTGCAAACATTCTTGCCTTTGCAGCTGCCACTTCCCCCAATGAAGCATGGATAGCTGACATCTCCACATTACACTCCTCTGCATCAGGTAGCAATTCCCCAAAATAAAATTTACCCCAAAGAGAACGACCATTAATTTCATAAACTCCACAACCATGAAAGCGATTATGCTTCCACTGCCCTGCATATTTGTAGTGCCCTTTTTCCGGCAATTCACCGAACTCCTCGATCCAGCCTTGTCTTTCTTCCCAGGATGGCATAGTTCTACCATGCTCCTCAAACTGTTCTTCAATATCCATTTTCAGCCATTCACGATCGAAAGGGTCCATGTAATCTGACCTCAAAATCTGACCTTCTTCCTTGGCCTTCATTGCTTCTTCAGAATCCGGTATAGGCTCATCAACAGGAAGATCAACTTCGATCATGCCATGCCCTTGCATCATGTTTTGGAACCACTCCCCTTCATACCTGCAGATGTCGAATGCTGTAGTATAAACACCCTTTCCATGTGCAAGGTCATCCCAGACGGTACCTTCATAACTAGAGCCATTCTTGAAGAGGTAACTGTACCACAGAAGAAACTCTTCTGTGCGTTCAAGCTCTTCAACAACGTCTTCAGGGGTCTGGATATCAAAGTGGTTATCAGGAATGGGGGGGTAGAATTTGCGGTATGGAACATAATAAGGGGTGCCGGGGGGCGCGGGCTTGCCCTCGCTCCAAAGCTTCTCATACTTCTCCCAGGAGGCCTCGGAGACAAAGTTAGGGTCCCAACCAACAGCACGCGTATCGCCCCAATAGTCTTCCCAGTGTTCACCCAGGTCTGCTTCAGTCCAATGCTCGTTATCTGGCGGGAAGTTCCATAGCTCCTCCTCATCCACTTGGTCATCATCCGCTTTGGGATCCTCTTTTTCTTCTTGCTCCTCCTCCTGCACCTGCCGCTTCCCCTCTACCTTCTTCTCTCCATCTCCCGTACCCTCTTCTCCTTCTTCGTCTTCGTCTGAGCTGTCTGTGTAATCTGAGTCATCGCTACTGCTATAATCATCTTCTTCTTGCACTTCTTCTTCTTCTTCTTTCTTCTCCGCTTCTGGTTTTGAGTCCGCCATAGCTGCAAGGTTCTGAAAGGAAAGAGAAGACTCTGCTGGCGGTGAGGCGCGCTCAATGCAGCATGTCCTTACTGCCCATCTTGCAAGCAGGCTTCAAGAGGGCGTATGGCTCCGTGCAGCACCTTCCTTATCCTCATTTCCCCTAAACCCTCAGCTTAATTTTTTGATGTCCCACATATGGCCTCGTGACTATCTCCCTCCATCTTGC |
| **TRANSLOCON AT THE INNER ENVELOPE MEMBRANE OF CHLOROPLASTS 55 (TIC55):**  ACACAAACACAAACACACACGCACATTTGATCACCTTCAATTTACTTCATGTGGGTGATGGAGATGGTGAAGATGATGGCGATGAGCTGCAAGTTTACAAGCGCAGTGCAGGCTGTGTCGCATTGCGCCCTTCTTCCTCATCTCCATCTCCTCACAAAGCTACCCTCGAGCTCGAGGTCCATCCATGGCAGTCAGAGGCTTGCCTTTGCTCCTCGTGCCCTCTCCTCACGCGAAAACACAGTATTGCTACAAGGAGAGGAAGGAGAAGCAGAAGAAGAAGAAGAGGAGAGAACAAGTTCTCCCATTGCGAAGGTCGACTACAACTGGGAAGAAGAATGGTACCCTCTCTATCTCACACGTGAGCTGCCCCGTGACACCCCCCTGGGTCTCTCCGTCTTTCACAAGCAGCTTGTCCTTCATTATGATGGCCATGGTGCCCTTCGCTGCTATGAGGACCGCTGTCCTCACAGCTGAATGTTGTGGTCTACCAAGCTGAGAAGTTCATTTATTCTCAGATTGGCAAAATTGTCAGAAGGACAGATTATTGATGGCAGACTAGAATGCTTATACCATGGTTGGCAGTTTGAAGGAGATGGTCGATGTGTGAAGATTCCACAGCTACCTGCAGGAGCTAAGATCCCCAAAGCTGCCTGTGTCCGGTCATATCCAGTTCATGATTCTCAAGGGGTAATATGGGTATGGATGGGAGACCAGGGCAAAGCTGACATCAAAGATATTCTTCAATTCAAGCAATTTGACGATCCAAACAATTCAGAAATCGCAGCAATTCACGTTCTACCCTATGATCACTCCATCCTCTTGGAGAATCTTTTGGACCCTGCGCACATTCCCATCTCACATGATCGAACAGATCCATCTGCAAAACGAGAGAATGCTCAAGCACTTAAGTTCGAGATCTTTGAAAGAACAGCGAGAGGGTTTGCAGGAAGGTGGGGAGAAGTGAATAAAGACGATTTCACTTTCAACTCTCAGTTTGAGGCCCCTTGTGTTCTCTGGAGTGAAAGGGAGAGGGTGGATAAGGACGGAAACAAAATTAAGTTCACAGCCATATTCCTCTGTAGACCTGCCGGGCAAGGACAGTCAATGCTAATAGCACGATTTGCACAAGTTAGCAAGAAGAATCTTCTTTCATTTGTACCAGAGTGGATTATTCATCAAGTTTCTAATAAGATTTTTGAACAAGACATGGGGTTCCTAGCCTCACAAAATGAAGTTCTTAACAGAGAGGGAGTAGCAACAAGCCATTTATATCTTAATCTCCGGTCATCAGATGTTTTTGTGATGGAATATCGGAAGTGGTTGGATAAGGTGGGGCATGGAATGCCACATTATATTGGCCATAAAAGCTTTTCCATGCCAGCTAAAGAAGCCATCTTGGAGGCAGCTCCTGCAGGTTTAGGGGCAGCAGCTGCATCATCCCAACCCATGAAAGGGGCCACTGGGTCTCTTTTTGCGGCAGATTCAACAAACCGATATTTTCGTCACGTTGTCCATTGCTCGAAGTGTAGGCAAGCCTTTCAAAATCTAAAATCTGCACAGAAGGTCTCCACTGTTTTTGCTGCACTTTCTTTCTCTTTAGGGGTGGTGCTCTCACGTACACCGTGGAGAGTGGCTCTTGTTGTTGTTGCCCTGCTAGCTGCTGCAGGGTCATACTCTTGCCAACTTGGCATCAATATGTTGACCACAAATGAGTTGCGGCCACATCGAAGATGATAAAAATTGTTGCCTGTTGTAAGGTAATATCTGAGTTTCAAGAAGGCTCATGAATTATTCTATTTGCTTGTCAAATATGTAATGCAATGTCTTATAAATCTAGTTCTATTATAAAAGATGACCTTTCTCATGTTGCCTTTACATAAAGACTCTTGTACACAGTTTGGAAATTCCACAAGAATCCTCTTAAGCCTAGATTTATAGCAGCTTCTTGTAATACATCTCTTACAGATGTCTCTAAATGGCTTAGCCATTGCTTTAAAGCAATTTTACCTAGTGTTCATGAACTTTGGAAGAATCTTCTTGAAGAAGTTGACATGCCTGTAACTTCTAGTTGGGTTTTGAATGACTCAATAGGAGTGATAAACCATTACTAAAATTTTCAAGCAGTAGAGAAATTATCTCCTACAAATCTTTGATTTCACAACCTACACCAAATTAAACTTGAATGATCTAAGGAAGACACTAGGCCTTTTTTTACGAAAGCTTTTGCCTAACGTTTGAAAATGATAGTTACAAAGGCTAGTAGAAAAATCAGCTTTGCATCTTGAATTTATGTGGCTGAAAAACAGAAAAGTAGATCTAGATAAAAGAAAGAAAAGCATCACTAAAGTTGTCGATAGATACTAATTGTGTTGTTTTTCTTGCTTACTTCTTTCTTTTTACATATGAGTGCGATTTAATGAAATGTCTTATCTTTGTCCATTCGTTCTTCACAAGCTTTGTAATGTAAGGGGCTTAGTAAATGACCTTTTTGTTCCCGATCCTCCTTTCAACAGTTCATTTTCATGAATGCAGGTCGAGGAATCTATCTGTGAG |
| **TRANSLOCON AT THE INNER ENVELOPE MEMBRANE OF CHLOROPLASTS 56 (TIC56):**  ATTTATTGCCGCCAATGTAGGTGACGAGGATTAGCCGCCGAAGGCGGCCGTGTTTGGCTACGCAGAGATCGAGGGTTAAGATTTTCTATCTCAAGGTCTCGGGTATCCTCTCTCTCCTCTAAGTGGATTGGGTTTTAGCGTGCAGAACTCGAAAGGAGTTCGCGAGTGAGAGATGGGGTTCTTCTTCTGCAGGAAGAAGAAGAAGGAGGAGCAGCCGAAGCCGAAGGAGGATACCTCTGAGAAGCGCGCAAGCGTATTCAAGGACCCGCTAAGAGTGAGGACATGGCAGGAGAGGTTCGAGCAATACCAGCTGGAAGAGCTGCACAGGCCGGACTACACCAAGCTCCCAGAAGTCGAAGCAGAGGCCAAGAACACTGGCTATTTTGCAGACCGACCATTGACACCCGCCGAGATTGCTAGACACGACGAGATCATTTCAAAGCTTCCAAAGAGTGAAACCTTCCAATTCCTTCTGGGTTGCGAGCAGAGGCGCCTCAAGGAGAATGCAGATGCCATTGCCCAAAACTCACGTCCTTATCGCCCTGAGGACAAAGAGCTTTGGCAGGCCCTCCCCCATGTTCCTGCCCCTCGTACCGGTGTCCCCATGCCTCGCATGGCCATCAAGTCCCATGCGCAGGCCCAAGCCACTTTCTGGGACTTCTTCAAGCAGTTCCATTTTGGCCTCTGGGGCTATCGTCAGCGTCCTTACCCGCCTGAGAAACCCAATGACATCCAGCAAATGCTCGGCTACAAGTGGTTGCACAAGCGTTATGCAGATTTTACGATGAGATCAGGTGGATGGTATTACAAGGATCGTCTGGGAAGAACAAGAGGTCCCATGGAACTTGTGAATATGAAAACAGCATGGGCTGGTGGCATAATTGATCGTAATACTTTTATATGGGGTGATGATATGGATGAATGGGCTCCGATCAGCATGGTCTATGGCGTTGAGGAGTGTGTGGATACGCTCGATATGAGTTTAGCTGCATCAGGGCTTGACTTCATTCACAGAATCACGAGAGGATTGCCTTTGTGGACCCCTAAAAAAGGTCATGAGAAGAAAAGCTTCAAACAGCTACAAAGTGAGGCTCTGGAGAAGAGGGAAAAAGAGAAGGCTGTTTTAAGGCTTAATGATGGAATATGGCCTGGAGAACGTCCTCCTAGCCATAGTCTCTTTTTGTGGGCAGGTGGCTCAGAGCTTACCACAATTTTGGAAGAACACTATAAGTATATGCCAGATAAATTTATTCCATATCATTTAAGGAAAGAGTTGGCAGAAGTGATTCCTGGACTTCGACCCTGGGAAGTCTTAGATGTAGAGCAGATTATGGAAAAAGTAACCTACGGGGAAAAATGGTATCGTGAACCCCTTGGTGCCTTCACAACGAGGGCTGATTATGATGAGGCTTGGTTCAATGACTACAAGGATAAGTGGGAGGGCATGTATGACGAGGTTCAGGAAACTTTTGCAACCGTTGACAAGAAAGAGTTCATAAGAAAGTTAAAGGAGCTTGAAAGGAAGAAAAGGAGGAGGAGATAAGTTATGGAAAGGTTCGTGGAAACCTTCAAAAAGTTTATACTGTTGTGGTTAATTTTCTTACGCTGCTTGAGTTTGCGGCCAAGGTGCAAAGGTAGAGTGCAATTTGTACGTGCTGTGAGAAGTTTATATCATTCATAGACCCCTTGCAGAGGCTATCTATGCCATGCATTTAGATAAGCAGCTTACTGAGTATATGCTCTCTCGTTTGTATCGTACCATGAGTCCTTGATATGTCTGTGTATTCTCGCATACCCTAGTTTACCAACAAGGGCATACACAGGGATGTGGCATCACAAACGTCTTCAAGAATCTGTTCAACACTAATGTTTTGCATCTTATGTTCACAGGCTTTTGCATTGGGGGTAAGTGGGAAGTCAAGGAGCTAGCGAGTAGCACATGCAATGAGCACTGTACCCCAATTGTCTTCACTATTGGTTTTCCAATCGAAACATGCTTTTTATTTCTGCTTAGGGGAGTCTACAAGGTCTGAGAGGCATGATTTTTTTTTTGCAATGAGGCATTATCAAGCTGTCAATTATTGGTAAAGAGTGATTGCTTCAATTTCTCTAATTTCCAAGCAGTTGTCCTAGAAGTAATGAAGCAGGACTAGCATGCAAGTCGTCAGAGCACGGTCATACCTATTTATAGTATGTTTGTTCACAAAAGTTAGTGGGAGAGTTTCAAATTTTATATTTTGAGTTTCATCCAGTGTATTTTTCTGTCATGACTGTGGGCAAGGGCGGCCGAAGTGGAAGGCAAGCGCCCTCAAAAAATTTGCACACACCAACTCACTAAGGGTTTCGAGTTGAGGACCTCTAAGCTCTACAACCCAAATAACCACATTCTGCTCTCTTGGGCTCATGTGGTGTTTTCCATACGGTTATTAAAATCTTAGTGATATATGCCTATTAAAATCGTAGATAAGTTTGTCTTTCAAGTTAGGTATGTTCTTACATTGCTAGATAGGGTCGATGAATTTGCTTAAAGTTATATACAATGGGTAAGGCTGGATTCACAAACATTTGAGTGGCCCTTGCACATGACCCATAATGTAAAAGCCTCAAGAAGCTAAAATGCAATTGTCTAATTTTGCGTGACATAATGCATCTTCTAACAGCTTGTGTGAAAAGCCAAAACCTTTTGTGCCCTATGTCTATGTTTGGGAAAGTGAACCCCAAACATCTCAAGGAAAAATTAC |
| **PROTEIN TOC75-3 (TOC75-3):**  TGCACATCGAGCATTCATGGATGATGTAAATCTTATCAAACAATAAGAAGCTGCGAGAAAATCATATTTCACTCTCCAAATTTGACTCTGAATCTTACATAGTGACCACCCAAATCTACATATTGAGACATGAGGGACGGCCCTTCAGGAAGCATAGAATAGTACAAAAATAAGTTGGTGCCTGCACTCTGCACACTAAATGCTTGACAACTTGAATAACAAACTACCTCATTAGAAATGCATACAAATTCAACAAGACAATTACGTAAAAATGGTGGAAAAAAAATGAAGGGGAGAGGAAATCTTACTGAGGACCATCTATATAACCCATAGAAGAAAATTGGGAGGCCCATGAATAATGAAACAATGGAAGTCCAAAGGCATCATGGTAGAAAGGTTTCGACCCTAGAACCTTTCTCCAAACCGGACAAATAATGATCCTGACCCTGTATTGCAGTCTTTTGTGTACTCAGCCCTGATTAACCCTAGCTTTACTCCCACCCCGTAAGACATGCCATTACCAGCACGTCGGAAAAATTCTGTTGGGTTTCCTCTAACATCTTTAGAGCTCCCCAGATCTGTTCCATATTCAAGAAACCCATACGTGTGTGTGTTCAAGATAGGCACACGCACCTCTGTGGCCAGCTCCAAAAAATTCCGGCACGCTCCCAATTCGCCCATGTTGTAGCCTCTTACAGAATAAGGACCCCCTAAAGTAAAAGCATCGTATGCTGCTAGGTCCCCAATGCAGCCACCATAACGACCGTGCAAAACCAGAATGGGAGGTGGAGCATTTTTCTCGCCTTCTTCTACTTTCCTTAGCTGAAGAAAATGTGTAAGTGTTAACTGATGCCTATTGAATATGGGATATTTGGTACCAATGCCGAGCCCTTGGTCAACCTGAAAAATATACCGAGCACCAACAGGTGTTCCATTGATAAACACAGTGTTATCTCGGGTCATGTTAGTCTGCAAAAAGCCAATTCGATCAATGCCCGTATCACTTAGAGTTGTAGGAGGGCCGTCCATGCTAAGGGCCCCATTTGGAAGTGTGCGGGCCCCATTTGTACAGACAGCACTTGTCTCATCCCTCGTGGTAATTTCTTCGAGCACCAATCCATAGGTGAATTTGCTTTGCCTGCTGAAGCTCTCTGATATATTAGCTTTTAAACCTGCCCGGTCGACCCAAATTGCAGGCACCTCATCAAGTCCTGGACCACCAGTAAATACTGGACTAAGCTTTCTACTGTTGAAACAGCTAGCTTTAAAAGTTCGGTTGCGAGGATCATCCACACCATCCAAATATGGATGTACGTACTCCATCTTGAAACCAAGGTCATCCTGAGGGTTGAGAAGGTTATTTGATGTTACAGAGCCAAAAAGTGATCGATTCAGCCCCTGCAAATTGCGATGCTCAAATGTCACACTTCCACCTGGCTGTATTGTTGCCAAAGTAGGCCAGCCAGAACCTCCAGGAGCAATACTCCACTCTGTGGAGACTTCAGCTGTCTTCTGATCAAGCTCTTTAAGCTTGACTTCAACAACAATGCCGCCATCGTTTTCTTCATCTGGACGTGGATTGACTTCAATGTTTGAAAAAAGACCGAGGCTATTGACACTCCGAAGTGCCTTTTTTCCTGCTTCAATGTTGAAAAGAAATCCCGCTTGTAGCTGCTCAGGGAGTTCTCTTTCTACAATCTGCATATGTGTGTTTCCTTCACAAGGAAGCCCCATCTTGTCTTGGAACTGCACAATGACCTTGGTAATGTCGCCCTCCACAACTTCGCAAACAATTTCTTTGGTGTTAAGGTTACCAAAATTCACAACCTGGGCACAAGCAAAGCCATTATCATGGTACCACTTCTGGACTTGATCTCTGATCTTCTGTAGGATTCTTGCTGTGACCCGCCTTTCTGATCGAAGCCAAGCACTGATATCTTTTTCCACATTCCTGGCAAGTATGCATGGGCGTGCCTTCTTGAGACGGAGTTTGTACTCTTCCTCTTGAGATTTCATGAACACTTCACGCTCCTTGTCAGTCAACTTTGTAATATCTACATCTGGAGGCTTCGTTTGTGGCATGAGACCCACATTTACACACCTCAACCCTTCTGTAGGTTGCCACTCGCTCTCTGAGAATGTAACTTGCATTCTGAGGGTTCCATCTATCTGCGGCAAAGCATCCATGTCAACCCTCTCAAACATCCCGCATCCTGCCAAATTCTCCAGCTCTGTTTGCAATTGTGCTTTCATAAAGACTCCACCAGGCTTCATTGTGATGAGCTCGTGAAAAGGGTCGTCGACGCCAACGGGTTTTCCAGTACTGTTGTCAATCAAGTCAATGCCAGAAATCTTGTACTTCTTGCTTGAATTGAGCTTGGTTACATTGGTCTTTGAACCTGGTTTCATTCCATGTGAATCATAGTTACTTTCGGGGTCTTCTGAGTTAGCAAAAGCCATGAAATGCTCTGCCCAATGACTCCAGGGAGACCCACCACCACCACCCCAGCCACCCAAATTGCTACCTCCTCCCGAACCCCCAAATCCAGCAAGCTGAAAAAGGCAACCTCCCGTAATTCCTGCTGCAGATCCTACAGCCGCAAAACCCATTGTTCTGCTGAGCATTCTGAAGCTTTCAGAGCTCTTCACACTGATCAGATTGCGCTTGAGGCTCCCCGCAACCTGATATGTTATGCCCTTGCTTCCTTGTGATTGTGCATTCGGTGCAGTGCAACAAGAGAACTTGTGCTGCAGTTTCAAGGGGTAATGACCCATGCAATGATGCTCCTGGGCTGTTGGGTCCAAGCTCTGTTGGGACACGGAAGCCATGGCTGCTGAGCCCAAGAGCACAATGGCTTGCCTCGCTATACTACGATCTTTCAACTTCCAACACGTAATCTGTATAGCTTTGTATATCAATGTGTCCATATATCTATGTATAATATTAAGGGAGAGTGAATTCAGGCAAGGAGAGATGCCATGTGGCAGCAAATGCCACATCCGGCATCTTTTCTCACCGGAATCCTATTTTTTTTGCTCAAAATGAACCCAAATGTCCCTTCTTTAAGGATCGGAATCCATTTGGACGTTGAAAGCTTTTGTTTCAATTTCAAATCTGAAAGCTTTATTTCATTAAA |
| **AMINO ACID PERMEASE 2 (AAP2)**:  GGGAGAGGGAGAGGGAGAGGGAGAAGAGAGATTCGTATCATCAGAAAATTGTGTAGGTGTGTGTGTGAGAGTAGAAGAGAGAGTGAAAGAGACTGAAAGCTTAACTCTCATGCAGCAACCATTTTCTCATACTACGCTTCTTCTCTTCCTTCACACAGCTTCAATGGCGACCTTGATTTTTCTTCAGCAGTAGCTACACTAGAAAGTAATTGCTGAGTCGAAGCTTTGCTTTGCTTCTTCCTTCACATCCTCCTTGCCGCTTTCTTCAGCCCTGGCCGCAGTAAGCTAAACAAGAAGCTTTGAGCTTGTAAACTGAAGCTTTCTTCTTCCTAACTGCAGTCTGAAGAGCCACCATAGCCGCTTTTATAAGCAGAAAGGAAGAGAGCAGTTGAAGAAGTTATCATTTTGCACTCGTACACTCCTTTCACGCAGGTTTTAGACATGGCAGATATGGAGTCATCTGGTAGCTCTAGCTCTTCACACAATGCCCCCCTCTTCAACGACTCAAAGGCCCTTCAAATATCTGGCTTTGGTGATGGAGAAGGCCTCTCTTCTGATAGAGATGAAGATGGACAGCCGAAACGAACTGGAACTGTGTTGACGGCATCAGCTCATATAATAACAGCAGTGATAGGGTCAGGAGTACTTTCGCTGCCATGGTGTATGGCTCAATTGGGATGGATTGCAGGGCCTGTGGTGTTACTCTCCTTTGCTTTGGTCACCTACTTCACTTCTGTTCTCCTGGCTGACTGCTATAGATCTCCCAATCGAGTCACGGGGAAGCGGAATTACACATACATGGATGCCGTGAAATCCAATTTAGGTGCGCCATCCTTCCTCTCAAATCGGTCATTTCTAGGCTTGTATCTTTTGGTGATCTGTTTGAAGCCTAGAAATATTCAGAATCTTTGATCCTTAATGGTTTGAGCTGTCTGATTCAATTTCGATCAGGTAAGTCATGTAAATGCTTGTGTGAATGTACGGAGAGTTTGATAAGTTAAAATCAAGAAGTTTGTGTCGCTGCGGCAGGGTAAGAAGTTGCTCTTCTATGTCTACTGGTACACGTTAGAGCTTTTTGTGGTTCAAATGTGATTATATAAACACAGCTTATTTTTTCAACTCTTTCTAGTATTAGGGCCGAACTCAGCTTACATCTTACCTGTGTGCTGACTTGCTCTGTAGCTTTCATTTTACTCATGCTGGCCAGGTCTCTCCATCTTGGTGTCACCTTCTGAGCACCCTTCTGTGCTCGCACGTCAAGGGGATTGTGTTTATCAATATTGTTTTTGCACGTTTACTCGCAGTTGCACGTGTAGTTCTGCTAACAACCTTTGTTTGGGATAGAAGGCTTCTGAAAAATTAGCGGCTTATAGTTTTCTCTGTATTTGGAGTTAATATTACACACGATCTGAACTCTTGATTCGCACCAAAGCCTGGTGACGAATGAGGAGATGCTTCACGCGATTGTCCAAAGCATGAAGCATCGCTGGTGAGATTTGCCGGTGAATTGTAAGGGACGTACATGAAAAAAGTCAGCATACTCACTACTTTGAAGCAATGACCACACTAGGGCCAGACAGCACCTCCGCCTTCCATTGCTGTTGTCAGACGTGACTAGGTTCTCACGACCAATTTACCTTTAGATCTTGTTAGGTGACGATGTAGGAGGGAGGCAGGAAGACAAGGAACCTCTATAGCGGAGGTCACCCAAGCCAACAATTTCTTGTCGCAACACCATAGTAGCCCACCCTTCGATTCTTATAGGAGTTGAGTGTCTGTTTTCCTAATCCTTCCAAATCTTGATCAACCATGGAATGCACCACAAGAATCTGAATTTGTAGGCTGGCATGCATTTTAGAAAACAAAGCTCATACCTTGTGTACCCATTTGTTAAGTTACAACTTAAAACGTCAGTGTGTTGTGACTGCCACTCAAACTCAGACCCGATTGTTAACCAGTTCAAGTAAACTAATTTGAATGTTGTCTCAGTATGCTGTATGTTGGTTTTACAGTTTATTTTAATCCATTTTTGAGATGTCATATGATTTCATTGCCAAAAGCATTGGATTACGTTTTTTGAAATTTCTTTTGCAAGGGGGTCTGCAAATATGGCTCTGTGGATTTGTACAGTATACCAATCTGATCGGAACTGCCATTGGCTACACAATAACTGCTTCGATAAGCATGGTGTAAGAATGCATCATTTTGTCAGTCAAACTGACTTAGTTTGGGCTTTAAGAGTGACTTAAATTGAATGGAGGCAGGTCTTTTTGTTTGTAATAAACACCTTTTCAGTGTACATGATGCAGTGCCATTCGCCGTTCAAACTGTTTCCATCAAGAAGGGAAGGATGAACCATGCCATATATCTAACAACCCATATATGATCTTGTTTGGAGCATTACAGATCATTCTTTCTCAGATCCCCAATTTCAATAAATTATGGTGGTTGTCTATACTTGCGGCAGTTATGTCGTTCACTTACTCATTGATAGGATTTGGGCTTGGTGTACGTCAAGTTATAGAACCTGGCCACTCTTATGGAACTCTTGGAGGGGTCAGTATTGGAGAAGTGTCAGAGGCTGAGAAGGTCTGGCTAGTGTTTCAAGCTCTGGGAGACATTGCATTTGCATATTCATTCTCCATGATTCTCATCGAAATCCAGGATACATTGAAGTCTCCGCCTCCAGAGAACCAGACCATGAGAAAGGCTACTCTTCTTGGAGTGAGCACCACCACCATATTTTATATGCTTTCAGGATGTGTAGGCTATGCTGCATTTGGAAACAGTGCACCTGGGAACATTTTGACAGGCTTTGGGTTTTACAACCCGTATTGGCTAGTGGATTTTGCTAATGCTTGTGTGGTGGTGCATCTGGTTGGAGCCTATCAGGTCTATGTTCAGCCCATATATGCATTTGTAGAGACTGGAATAAGTAAGAAGTCTCCAAAGTGTGATTTTGTTTCTAAAGAGTATGAATTTTACATGCCAGTGTATGGCACATACAGCTTCAATGTTTTCAGATTCATTTGGAGAACGGCTTTTGTAGTTGGTTGCACTCTTGTCGCAATGCTCCTTCCATTTTTCAATGATGTTTTAGGGATTTTAGGAGCCACGGGGTTTTGGCCGTTAACAGTCTATTTTCCCATTGAAATGTACATTGTGCAAAAGGATGTAAAGAAATGGACAAAACAATGGTATGTGCTGCAGTCTGTCAGCATAAGTTGCTTGATTGTTTCGATTGCGGCACTTCTTGGGTCAGTTGAAGGTGTTGTACAGGACCTGAAAAAGTATAAACCTTTCCAAACACAGTATTAAAATCTATATTGAACATTACAAAGCACATTTTTTGTACTTAAAAACACATTTTATCTAATAAAGACGACTCCTATGCTCATTTTTTTTTGTA |
| **AMINO ACID PERMEASE 3 (AAP3)**:  GAGAGAGAGAGAGAGAGAAGATGAGAAAAATGAGGGCAAATGTAGTGTGTGGTGATTGTGAGGTGTTAGAGTGTGTATCAATAGTGAGTTTTGAAGGGGGTGTAGCGTTTGAGATCATTTACAATGCCAGCAATGGAGCCTATAGCAGCAGCAAGGGAGATTAGCAAACAAATAACGCTCAAGCAATGCAGAGCCACCCATTTAGGAGTCCAAGGCTTGAGCTTGTTTTGAGAGATGTGCATGCTAATGGGGAAGAAGACAGTCAAGGGCCAAAATGCAGTAGCCCCCAAGAGGCCCAATATGTCATTGAAGAAGGGCACTATCATTGAGATCACCGTCGTCGTTATCACAAACAGTGTCCTCCATGTCACTCTGAACACACTCAGCTTGAATGGCCTCCGAAACGGTAGCGGTACCTTGTGCTCGTATTTCATGAATTTGTGCTCAGACCACCTGCTCATCATCCAGTTCTCCGAGAATGCGAACACCGGCTGCGTGAATACCTGCGATTAAAGAAGTTGAAAATTGAAATAGTTGGGGAAAAGACTAGTCGTACCTGGTAAGCTCCCACAAGGTGCACTACAATACAAGCATTGGCAAAGTCCACAAGCCAGTATGGATTGTAGAATCCGAATCCAGTCAGGATGTTGCCAGGTGCCATGTCCCCAAATGCAGCATAACCGATACAACCAACAGACATGTAATATAGAGTGGTGATGACAATGGCGATTAAAGATGCCCTCTTCATTGTTCTATTTTCCGGAGGTGGAGATTTCAAAGTATCCTGAAACATTACAAAGGGCACTTGTATAACATAGAGCAGCTGGTACAACCCAGCATTCAAGCGTCTTGCTTTACCATCATTTATGCGTCTTGTAGCCCCAAAGTGAATGTGTTAATTGTATATGCATGTTTACAAGAGCACACACACTATTGATGCAAGCAGTCACATTTGCTTGTGTGTGCTATTTATGTAAGCAGAATGATATGTGGTGCTTTTAACGCTGGACTAGAAGCCTGCTTATCACTCTCACCATAACTATCACAAGTAAAAGTGCTGTCAAATTAAGCCTTCAAGCTGGATATTCAAAAGCACATATTTTCAGATTGTTATGTATGCCAGGATTCTACTATTTAATCTTCTTATACATTGCAGTATTGATTATTTACCTGAATCTCAATGAGGATCACAGTAAATGAGTAGGCAAATGCAATGTTTCCAAGGGCTTGGAAAACAGACCAAGTCTTTTTCTCCCTTGAAATGATATCTGCACTAATTCCTGTGAGTGTGCCATAGGAATGTCCTTTCTCTGATGCTCTCCCAATAGACAAACCAAGGCCTATTGAAGAGTAAGAGAAGGACATAACAGCAGCTACTATTGATAACCACCAAAGTCTGTCAAAATCAGGTATCTGCGACAAGATAATTTGCACCGCACCAAAGAGCAGCATGTATGGGTTGTTAGATGTATGGCACTCTGCCTTATGACCATTTTTGTGGAAGCAGTTAGATCTGGTAATGGCCACCATACTGATTGATGCTGTAATGGTGTAGCCTATAGCCGTGCCGATAAGGTTAATGTATTGCACAATGCCGCAAAGCCATACATGCTTTTCACCTAGGTATGATTTCACAGCATTCATGTAAGTGTAGTTTCTCTTCCCTGTAATTGGATCAGGGCATCGATAGCAATCAGCCAGAAGGCGAGAAGTGTAATATGTGACAAATGCAAAGGCGAGTAGAATGGGAGGTCCGGCCACCCAGCCAATCTGAGCTATGCTCCAAGCAAGAGAGAGAACACCCGAGCCTATAACTGCTGTCACCACATGAGCTGATGCAGTCCACACGTTCCCTGTCCTTTGAACATGTCCATCATCATCACGGCTCTTTGATCTAATGAGCACAAAGGGGCTGCCAATGTCTTTGCCTACCTCCACAGCACATCCACTTCTCACGGAGTCATCTTTGTTTGTCGAGCAATCCGAAGCAGAGTCATTAGGCCTTGTGAGTTGATAGTTCATTTCATGATCTTGTGCCATGATTATGTGTATGGGATACTTAATAACACTTGCACAGAGGTCACTTATTGGCCATTATACAGACTAGCTGCTCCACCTGCCTGAATATGCTTCATTATCTGTCCACAGCACTGATATTTTGATGTAGGGTAAGATAGTTGTGAATGCTGACGACTCATGACATTGTCCGCCGTCGATGAACTTCCGTAATGAAGTGTTTCAGCTACATGGTAATCGACAAAGCCTATAATTTTGTGCAAGCTTCAAAGTAGAAGTAGAAAAAAAAACACAGTCGCAGAACAAATTATGTGCTTACAGAGATACTGATGTCAAAAAGGGAGGATATCACCATCTTTAAAAGGGAAGCAAGTAAACAGGCAGCAT |
| **LYSINE HISTIDINE TRANSPORTER 1 (LHT1):**  GCTCCCTTATATGTCATTTTTTGCATGGGCAAAAGCCTTATTATATTTCTCCTATATATATATGCCATATCACATGCTAAACTTGGGAGGAATCAATAAGAACCCCATAATATTTCTGGAAAATCCCTCTACCCCAAAAGCCAGCTTGTGAATCTAAGGTGCTAGAGGGTCTAATTTGTCTGCAAGATTCCCTTATTTTTTACAACCAATTTGGTGCCTCTGTGCCAAATTGTCAATAGCCAAATCTCTTCTTGTGCATGCTATTTTTGGATTCTCTAATTAAAGCCCCACTATATAATTTGGAGCCTTTGATCACTGCCCCAATAAACCTCTCTCTCCTCAATTTTACATAATGGTCCAAGAAAATGGTGCAGAAGAGAACCTTGGAAGAACCATATCTACTAATAATAGTCACATCCCCCTTGAGGATGAGAGAATCAAGAATGTGGATGATTGGTTACCTGTAACAGGTAGTAGAAATGCCAAGTGGTATTACTCAGCCTTTCATAATGTTACAGCCATGGTGGGTGCTGGTGTCCTTGGCTTGCCCTATGCCATGGCCCAATTAGGATGGGGACCTGGGATTCTGGTGTTGGTGCTTTCATGGGTGATAACATTGTACACATTATGGCAAATGGTGGAGATGCATGAGATGGTCCCAGGAAAGAGATTTGATAGGTATCATGAGCTAGGCCAACAAGCGTTTGGAGAGAAGCTTGGCCTATGGGTGGTTGTTCCCCAACAGTTGATAGTAGAAGTGGGAACAGACATTGTATATATGGTGACAGGGGGAACTTCATTACAACAATTCCAACAGCTTGTTTGTAAAGGCGATGGTTGCAACAAATTTGGTCTCTCTGTCTATATCATCATTTTTGCTTTGCCCCACTTTCTTCTCTCTCAACTTCCCAATTTCAACGCGATTGCTGGTGTCTCTTTGGCTGCTGCTATCATGTCTATCAGCTACTCGACCATCGCATGGGGGGCATCTATACATCACGGAACTAGAGATTACACATCATATGATTACAATTTCAACACAAAAGCAAATGGGGTGTTTCAAGTTTTTAATGCACTAGGAAATGTGGCCTTTGCCTATGCTGGGCACAATGTTGTGTTAGAAATCCAAGCCACTATACCTTCCACCCCAGAAAAGCCATCAAAGGTCGCTATGTGGAGAGGAGTCCTTGTGGCTTACCTTATTGTGGCCTTTTGCTATTTTAGTGTTGCTATTTTGGGGTACTGGGCCTTTGGCAATACTGTTGACGGTAACGTTCTCAAATCCTTAAAAAAGCCTACTTGGCTCATTGCCACCGCCAACCTAATGGTGGTAGTGCATGTCATTGGAGGTTATCAGGTATTATTACTAGCTTAGTTCTAAGCATTTCTTATGAAGTTCACTAATAAGCTGCACACAATCAACTTGTAAGTGTGTACATGCAGGTGGGAACATGTGTACACATGCACACATATATTTAGATACATTAATTCACATAAACACATGCACACACCCACGTGCACAGACACATTACAAGTGAGAAAAAGGAATCAGGGAACCAATTGAAATTTCTTTTCATCACTACTTGAAAATGAAAATGCCATTATTATTTTGGAAAACAATCAAGCGAGTGCGAGTGCGAGTGCGCACACACACAAAGCCATCCAGGGGTTGTGGGGCTTAAGATGGGAATAAGTAGCCAACAAATTATTTTTTATCAAAACAAACCTCAACCAGAAATCCCATATTGAAATTAGTAACTCTATTGAAGATCACAACTCTACATTACACAAGGGCATGCACTCACAAAACCCACCTAAAAGAGATTTTTTAGGCTCTCTCCAAGTGTCATCCCATATGCTAATTTTGCACTCCTTTCTTCTAAGGTTAAATAGAACATCTTTAAGAATATGTAAGTGTGTGGGTTGGTGAATATGTATTTTTCATAAAACCAAAATTATAGAATTTGGTCTCTTAAGCTTTATAAGCAAAATGAAAAATCCTAGCATAATTTTGGTGAATCTTTCTACCAAACCCACCCAAAATTTAATTGAAAAAAACCTAGGCAAGAATTTTGGTAGTTGCTAAATAGCCAAAAATTTTAGGAGACCCTATAAAATAGAGTCTTTCTACCAAAGCCTACAAATGGAAAGCTCTAGGCAAGAAATTTTGTTTTTGTGGAATAGCAAACTATTTTAGGAATCCTTGAAGGATAGCCATTGGGTTATAAATAGCTCCTAATTTTTTCCTTTATTTCTTCTACCATGTTTGTCATTGAATAAAAAAGGGTACCATTTTAGCTTAAACTACTCATGGTAGGAGCTTGCTACAGCCCTTGCATCATCCCTATATGACATTCACCTAATATTTTGCAAGCCCTTTAAACCTTAAGACTAGTACTTGCAAAATTGTATTTCTTTTTTTTTGAGAGTTGGTTAGACATTTCAATGGTAACCCTGGGATGAGGGTTTGAAACTCTATTGGCGCTCATGTACTTGCAAAATTTAACATCTTAAATTTTTGATTGGAAATAAGGTTCTCTATATAAAGAAATATTGAGAGTGGATCTTTTTTTTATGTTTAATGCCAAACTCTTTAAAATAGCATGAAAAAAGTAAGTATTAAGCTAACTAAAACTTGTGGCCTCCATTAAATGTGAATCCTTCCTTCTCAAACATGATGGAACTCCAAATATTGAACAAGGAAAGTCAAAGGGAGAAACATGAACATTATTAGATATTAAATATTGTGGAAGGCCTTATTTTCTTTTGTAACACTATTAAATATTATTGTGGAAGGCCTTATTTTCTTTTGTAACACTATTAAATATTTTGTCCTACAGAGACACGTCTCTTAGAACTTTGATCTTTTAAAGCTAG |
| **CATIONIC AMINO ACID TRANSPORTER 1 (CAT1):**  TTTTTTTAGGCCGGAATTATGTTTTTTATTATATATGAAATGAATTGCCTGGGCCCAAAACAGGCAAAAAACAAGCACAATACAGTCAAAAGACATTTCAAAACAGTGTCTCTCGCTCAGGGCTTCAATGTTCAATGTTGTTCATAATCCAGCATGCATCATGCATGGGCCTTGACCGACCCTACAATTTAAAGGTCAAAATGTGTGCAATTCTCTATTTTTTAAGTGAATTTACATGTCTTAAAAAGTGGACCGTACCTCTATCGAACTTTTTTTCCCAATTTTAAAATTCCCGCACTCGTACCGAATTTTCGAACCGTATTTTTGTACCTGATAGATATGATTGTAGTCCTTTTCGTGTTATTCGTTGGATTGGTCTTGTTGCATATGAGGTTGACTTACCTTCCCATGTTCGTGTTTATCCAGTCTTGCATGTCAGTCACTTGAAAGAAGTTTTGCATGTTAGTTTCTTCTCAGGATTTGATTGCAGTCGAGGATTTATCTTTTGTACCGTATGAGCCTGAAAGGATACTCGGCTTTTTGTGAAAAATCGCTTAGAAATAAGCTTATCACGGAATTTAAGATTAAATGGCGATATCGGATTCCACGTGTGAGTGGTTACCTACTCTCCAGAGGTATTTTCTTGATTTTCTTCGGAGCTCAGGAGTGAGCTCTTAGAAGAAGGGGAGTATATCATGTGCATGCCAGAGTTGACCGTGTATAATAGTGAGTACATAGGCCTAGGCTAGGGGTGCATAAGACTAGATTGGCAACCTAAGACCTTATCGTCGGTAAGCCACCAGTTTTGGGCACCCACGTCTGGATGCCCACGATTTGTATACACACATGGGCAGATCATCAATTGTGTGCAGTCTTCAGGAGAGCGCTGCATGAGTGCAGTGCAGTAGCGATCATGGTGCCGTGTGGACGCACGCCTGCTACACATGTAGCCAAGGCCGACAACAGCCTTGGGCTCTAGCAGGGTATTGCGGGTGGTATGGGATGCCAAGAGAGTAGATGCTGGTAAGATGTGCAATCTAGGAGCTCATCTTGTGCGTCGACGGCTGATCATGAATAGCGCATAAGATCGGAGGTGAGTCAAACCTGCACCCCCTACAATCTCATAGGTGTTTGATTTAGTTTGGCAGGTGTCTTGCAACTTGGGAGAGCAGGTCCATGCAAATCTATGTCCTGGAGGGGGAAGGATGTACATGTAAATGCTCCTCTAAAGGGAAGATCAGTTTGTTACCCTACATGGTCAGACAAATAAATCACTATTTCATGGGTTTTGGCATTGATAAAGCATCCATAGCATCCAGCACCACAAACCTTCTATGACAAGTTAGGAGTGTTGAACGGAGTCGATGTTCCTGTACACGTGAACATGAAGAACACACTGACAATGAGAATCTTCGATGATAAACACAAAGCTGCAAAGGACAAGCGTCTAAATCGACTACATTATTTTACAGGAAAGCACAAAAAAATCTCAGGCACTCACAATACTGTTTGGATCTGAAGAAATAACTGAGATCAAAGATTGTTTTTAATCACGTTCATCCTGTGAACAACTGCCAGTTTAAAATTATACATACAATAACATATGTACTATTTACTTGTGTTTAGATTGCTTCTTGAGCATTTCCCAAATCCGGTCCACTTTTCTGGAGTGCCTTCTCCTCAGTTTGAGGCTTCATTTCCACAGTCCGGCCCTCCTCACTTAAACTCTCTGTTTGGTCCATTGCGGTGTCGTAGGAAGCATGTAATCCGAAGAGAACGTAATACACAAGTATCAACAGTGTCCACACTCCAAACCTTGCAAATGATAGCCTATCAATCGAACCCAATAGGAAAACATTCATGATAATGGACAGGGATGGAAGCCAAGGCACAAAAGGAGTCCCCCATACTTGTGGTTGTCGAGCTTTCGGAACAAATATGGCTAGACCCAATGTAGCCAAAAACCAGATGGGTACAGTAATCACAAAGCCTATCCACCCATCATGTGTAGCCCAATAATAAGCAGTAGCCCCAGACGACAAAAGAATTGTGACAAGGAACATCTGAAATAGCCGAAGTTCCTTCACCGTGCTGTGCCCAGCAACATAATAGCGCCTCACAAGAAGAGCTACACTCACTAACATGAAGATGAAGAGTGTACTGATAGAGAGAAGATTGGCTAATACATCAAGGCTAGTGAAAAATGCAACAATCGCACTAGCTGAGAACATGACTAATGTTGCTCGTATTGGAGTCCCTGTCTTCTCGCTTACTTTAGCAAACCATGGAGGAATCATATGCGTACGCGCAATATGCGTAACATATCGTGCCTGCCCCACAGCACTCACCAGTAAAACAGTTGTCATGCCTTTCAAAGCACCCAAAGCAACCAAATACTGAGCCCATTTCCATCCCGCTCGTGCTTTAAATGCCAGTGAGAAAGCAGCATTGGGATCAATATCCTTATAGTTCTGCATCATGGATAAGGTCAATGCCATTAAGCAGTATAGAACTGTAGTGATTATCATTGAGCCCAACAGCCCAATAGGAATATCTTTTCCAGGGTTTTTTGTTTCCTCCGCCATCGTTGCCACAGCATCAAACCCAAGATATGCAAAGAAAAGGACTGATGCCGCCTTGAAGACACCACGCACTCCAAATGGTAAGAACGGTATCAAATTTGAAGGCTCCGCATGCACGAGGCCAGCAACTATGACAAACAATATAATCACCATGTTCGCAATGGATGCTGTCCAGTTTAGCAGAGAAGTAGCACGTGTGCTCCAAGTTGCTACAAGGCCAGTGATAACTAGTGCCGCTACTGCTATAGGGTCGAGAAGATTGAAATCCTGTGCCAAGCTTGTCTTTATGCGGAAATCATCTGCTTGGGTACGACCACATAGAGTAGCAAAGTAAGAGCTCCAAGACCTTCCTACAGCAGCTCCACCTATGATATATTCTAGTATGATGTTTCCAGCAGCAATAAATGCAATAAAATCCCCTAGCTCAACACGCAGATAAGCAAACGAGCCGCCAGCTACCGGGATTTCGACAGCAAATTCAGTATAGCAAAAGACTGACAGCATGGCAGAGATGCCAGCGGCAACGTATGAGAGGATTACAGCAGGGCCAACTTCTTTATTGGCTTCTTGACCTGTGAGGACAAAGATACCAGCACCGATGATAGCGCCGATGCCAAACCACATAATGTCCCACCAAGTGAGGGTCTTCCTCATGGGATTCTTGCTGCGATGCACAACGCCATGTGTCTCCATAAAGTCTGAAGATCGTGCATACACACGATTGAGAAAGCGCGCCGGTGTTGCAGCAAGTGCCATGCGGTAGGCACCCCAGCTTTCAAAAGAAGCCTCCGGCAGGAAATTTGCCTTGCAAGGAAGCCATTGTGACCCCTTCGCCTCCATAGTGATATCCAGGTGCAAACACAAACACAGAAATGACAAGGTATGTGTGTGTGTGTGCGTGTGAAGGGGAAAACCCTTCAAATTTAGTATGATAGGAGCATAGGATTGAATGGATATGAAACATGAGATATAGAATTACAGAGAAAGCCCAATGGTATTAACAGAGAGCACCTGATTGCCGCCATAGCCAGAGCTAAAAGCAGAGGATTGCAGCCGAAGTAGAAGGCTTTTTGTTGGCACACATGGTGCATGCACGCGTTTTCGAAATCTTCGGATGTTGGGTGGAGAATACAAAGAGTAGCGTCCGTCGTACCTTGGACTTCTCAAGCTGATGATGCTCTGTAGTGGTCACATTAGTAAATGGGCGATTGTGTGTGTGTTGATGCTTTTCTAGACGAGTCTTGGTTCTTAATGTCTTGACACTCGGCTAAAATTGTGTGTGTATGTGTGTGTGTGTG |
| **PROTEIN NRT1/ PTR FAMILY 8.2 (NPF8.2):**  GTTTTTTCTTGTAGCATCAAATTTGGTACCGAAAGAAAGAAAATATGGGGTTACAACGGAAAGCTGTGTATGTACATTGAGTCAGGCTGAAGATTAGCAACTGCGTTGCAGGCAGTTGTGTTGCAGATATGAAACGATGTGCTGGGCTCAAATCATTGACCCAAGCACTCTTCAAATACATTGATTGGCCAAAGCTCCCCTCATCAATCCAGGCGACAGTCTTAAGAACACACTGATTGGCCAATTCTGCTACTGTTGAAATATCATTCGATGCAACGCAGTACACAACCAGTGCATGATCCCCTACTGTTGTACCTTCCTCTTTCACAACACAATTATCCACACAGTAACTCAGGGGGAAAAGCTTATTTTGAGAAGACTTTTGACTTCCCATAGGCCATACATTATTACATGCCATCATTTGTGACATCCTCCATACACATGATCCAAGCAGCCCTAGAAGGTGAAGTAATGTCTTGTCCATATACCATTGTAAGAAAGGCATCAAAAACTAGACTGCTAACTCTTTGATTCAATCAAACCAAATGAAAACCATGGAGGATAAAGCATATGCTCTTGCTGTCCCCTAACAACTGAAGTCGCACTGCCAAATTGAGGCAAAACACCTTGACTACCCTCATGGCATATTCACAAGGCACTTACAACTGCAAATTGCAATGGAGGCAGTAGAACTCATCAACCACCTTTGAGGAAGAGCCCATGACACATCTTCAGCATCCCCATGGCTGTGGAGTACAAGCTGAAAAATCAAGTGCAGCACATGAGATGAATTTCAGTCGCTTATGAGAACTACGCCACTCAAGGTCCCATTAGCCTAGACATTTAAAAGAGCTTTCGGTTAACGAGGGCAGCCTGATATCTGAGAACGGCAAAAAAAGCCATGAATCTCAAGGTGCCAGCTTCTCAAATGCTTCCAGCCAAACCCCCTGTCCCCTACTTTATACAATAACAGGGTCGATGGAGCATTGGGGTTTAAAAGAGCAGCACTCTGAAGGGTGCAGCAAGACATGGAGCATTTGCCAGCCCTGTGCCTTCTTTTACCATGCAATGTTCATTAGCTAGGATCCACTCCTTAACCTTAAGTCAGCCTCATTCCTTGTAACCTCACACATGCATTATCTAACCAATCAAAATCACAGTTTCAACAAATATGCAAGGCTACAAAAAATGCACATGAGTATACAGGAGTACAACACAAATTCTATATAGATAACAGCACCAACTCGATGATGACAAGGCCCCAAGATTGACTGCACGTCTTCATTTCTACTTTTTCAAAGATATCTAAAGTTTCGAATTGATGATAGCTCATTGTTGCCACAATAGACCCTCAACAGGTTCACAAACCTTGTCTGCACATGCTAACATAACATTCCAAATGACTCTTTCCAATTAGCGTGCCGGGAACACTCAATATTTGGCAAACAAGATGTTATACATCAAAAGAGACTTTCTCACCATGAAGTAACCTCAAATTGAGGTTTATTACCTGTAGGAATAATGAGCATACGATTTATTGAAAAAATCACATGTCGACCCTTCGGATCCAAGCTAAATATGTTTATCAAGCCATGTTGTGAGCATATACAAGACTATATCGCTTGTTGTCGCAATTGACCAACAGTATCTTCTTATCACTCAAAGAGCTAAATTTTGATTAAATCTTGGCGTAGCACCATTGGCAAGGTGTTCTTTCCAAAATCATCATTGAACAGCACTGTATAATCCCATCTTTCTAAATTGTAAACTAATGAGAGCGCCTAATACTGCGGAAATTATATGTCCATCTCACAAAAGGGTGCAGGCAGTCAAAATGGGATACAATAAAAGCATAAACTTTGAAAAGATTGATCCCACCCTCTCAGCAATCTTCAACAAATGGAAACAAGGCACCTTCCCAACCGTCATCTCCGTGTTCTCCTTCAAAACCATCATCTCCTTGCTCTCCTCCAAAATCTTCACTCTTGCTATTTCCATCAGTGCTTTCAACATCTGTCACTGCTTCATCGTCTTGCAGTTCAAACTTCTCTAAATTTTTATCTATGGAAGTAGGCAGACTCTCAGAGTTCTTATTCGAATTGACCGTTTGTGTTCTCAAGCTGGGAGAAGCCTCCTCAATTGCAGATGCCATCCATCTACTGTCAGATCTAGATTCGGCAGAGTCCATGCACTTGAAACCCTTGTGGTTACTATAGCAGCCATTAGGAATGCAGCCTGCATTTATCAGCTGTTTTTCGAAAGTGTCATTGCCACCAGCTGTCACCGCATCCTTATCATGCAAAGGCACTGGAACTCTCACCCCCTCCTGAAGCACATCCAAGCGATTGACCCCAGGTTTCTCTGTGGCTTTTGAGTCCATAGCATATGTGTCTCCATTTTGGAAGGAGATATTCATAGATGGGAAGCCAACGGACGCTGGGGTTATACTTTTCTTAGATTTGAACAAGTCAATGCTGGGGGAATGTGTATTTTGCAATTTACTCCTCTCCGCATGAAAATTCTGGTGAGGCTCATGAACAAGAAGGGTCTGAAATTGCAGGTCTAGGGAACGATCTTCATAAGAATGATGGCCGTTACTAAATCCAACATTGACCCCGCTACACAGACTTCCTTCTGACCCACAACTACTTCCACTGCTAGAATACTGACTTTGTGAACCCCCAACATCTGTGCTAAACCCAAATCTCATGGTTGACTGAAGGTTCAACGGATTCAGACGGCCCTTTGGAAGGTAACTTGCATCTCTCACGTCCTCCCCGAGTTGATAATTCCTAAACATGTCAAACACAGGCACCAGATCTTTCTTTCTCACCTCCACAGCACGGCTAACAACTTTCTCAATTTCAAATTCTCCACCAGAATCATCTTCCCGGAGGACTTTATTGAATGCTGGTCCAGATAGTACATGAAAGGAAATCTGAGAACTTGCCCATATTGGTGGCTTGAGATGATGCATATGCACCTCAGCATTGGACAAGAACCATTGCTGCATCTGTTTATTGGTTGTTTCCTTCAAGATTGTGTCTAATTTCCCAAGTGCTGCTTCATTCTGAGATAGGCCTGCCTTGATCCTTGTTGAATGAGTTGAATTTCCTGCTCCATCATGAGCAACATTGAGGGCATTTGAAATATTGACCTTTTCTTCTCGCTCAACCCAATTTGGCCTGCGGCACAAATCCCACTTCTGTAAAGGTTCCACGATCACCTTGAAGTCGAGTACTTCTTTCTGAAGGCCAGCTACAATCGGAGAAGAAATACTATCTGAGTGTCCTTCAGTACAAGCTGACAAATGAAGTGCATGTCGAATAAGGTGACCAGATGGAGAAAGGATCCACAGCTGTTCCTTTAAAGTATTTTGGCCCCCCTCAGCATCAAGTTTGCGACCTCGTCCATCATGAAAAACGACTGCAACTGCTCCAAGTGAGCTGCAAGACCTACCACTTGCAGCAGCAGCAGCACCACTCATTGTACCACACCAACCACCATTTCCAATTTTTATTCTACTCACAACAGACAAACTAACAGTCGCAGGTAAACGCCCTGAAACATACTGGCTGGACCTCAGTGGACCTCTGTTGGACCACCATGGAAGTGATTGCACTGATCCAAGAGCACAGTCAACAAGACCTGATCCATGAGTAGAGGGCCCAACAGCACCTCCAAATGGTGATATAGCAAACAGATGATGTGTTCCCCTAGATGAGCTGACAACAATCCAGTGGCTATCTTCACTGAACGCTATATCTTGTATGACCGCATTAGTCATCCCTCGGTAAAGCTTGTAAAGGTGTACATGTGATGAGTTTGTGTCATATGAGCTTGTGTTGATACCATTCATATTTGGAGCTGGCAGTATTCGAAAAATGTTGATATTATGCCCATGAATAGAGGCAGTAACTAATAAAGTTCCAGTGCCATCAAAGCTTAATGCAGATAAAGGACTGTCGTGAGCTCGAAATTGAGATACCACAAGCTTGGTCACAAAATCACGCACAATAACCGTTCCTGCATGCTCTGTATGGCCACTGCTGCCCTTGAGGAATGGGCTCCCTGAGACTGGTGAGCCGCCACCCTCAGTGCAATACCTTGATAATGCTTTGTATCCTTTATCTCCCAGAGTTACAATCCCAGCAGCAAGCTGCTTACTTGATTCTTTTGCATAATGTGCAACCAAACTACCATTTGCAGGAGAAGTTGACGGGCTGACACCAGGAGAAGGGGTGAGGTGCTGGGGAGAAACCCTTCCAGTATTTGAAATAATAGGCTGATTTGCTGCATAAGCCAACCACCTTGGTCCAACAGCCAATGCACCGTGTCCAAAACTAAGCCTACTTGATCCCAGTTGAGAGGAAGGATATGTGAGCACACTAAAAGTACTCTGGAGTGTTGCTGCATTGAAGCAGTGAACTTGGGTAGCAAGAGCAACTGCAACAACTCGAGGGCTACAACGAACAGCAAGAATTGCTGTGCGAAATCTCAATGTATGTACATAAGAATGGCTTTGTAAAGAGTAAAATTTAACAAGAGTAGGAGCATTTAGATTCTCCGTTACTGGAGGACTTGCAACAACTGCACTATAGCCATTTGTAAAAGCGCCGTTATTGCGACAATTTGGTGAATCAGAGGTGACAACTAGCATTAAAGGATGGGCCAACTTGAATTTCTCATCAGATGTTTCTGTAGGCTGAGGCTGGACACGCAAAAAAATGACTGGACCATCACGTTTCGAGACGATCTCCCGCACTTCATTTGCATTTTCCACATCCCAAACTTGAAATCCATTTGTATAAGTCAATAATAGTACTTGTCGAACATTGGCTGGTGCTAGCTCTATTTTGTCAAAGCCTGCCCATTGCACCTGCTCATATTGACGGTCTTCGTCAGTGAGCGTGATTGTCGATGCAACTGACGAACCTGCAGAGCGTACAGTAGAAGCCAAGGTGCTGGCACTGCGAAAGATGGCTCGAAATGAGCTTGGGATAAAACCACTGCTGCTGCCTGTCCTCGGTGAACAGGCTTGCAGATTGGCATCATTCATAATCCAACGTCCACTTCCCAGTCCTCACAAATCTTGAGATGAAAGAAACGCTTTGAATCCAAATAAAATACAGCCTTGTGCATACCCAGGCTGTTTCTTATACTACAATGTGAAACAGCCTTTGCTTGATTATGCTAGGGAGATCGGATGCCCACTGACTGCACCATTGTAAAACCTTTTGCTTTTGCTTCTAGCTCTCCATTTTCTGATGAATGGTTTCTTGCGAATGAGTACCTACTGAAATGAACAATCTGAAGATAGGTTTTCCCAAAAGGGTAGCTTTGATGGCAGCCTTATTGCTCTAAGAAAGCTGCACTTACTAAAGTAAACAATGGGATGATTAGGAAAACCCAAATCTGGAACAGGCGAGGCTTGCAAAAATTGGCAGGTCGGTGTTGCTGCTTTCTCTATTTACACACAGACCCCTGAATAGCCTCGAATACATACAGGAAGGGAAAAGGGTAAGTCTATTGCACCCACTTCGCCTCTATAAGAAACCTGCTGCTTCAATTCACTATATACACGCGCAGCGCTTGTCGAGCTCCTCTGTACAAGTTCGTGCCTCGTTTCGGAGAAACAGAACGTCGTCTGCAGTTGGCTAAAATCTGTACAAAGAGGATGGCGATGAAGGACCCAATTTCACGGCCGAAGTAACGAAGCAGACGACGACGATGATGATGATGAGGATGACGGCAATGACGATGAGCTTCTTGATCCACTGACAGTCTTGTATGTATACCACTTTGCACATGCCACATAGAACACACAATTAACTAAACTAATGCCTGTAAGGAGCCAGTAAAAATAGTCCAAGTGGCCTCTATTTATGTTACTTGTAAACCAACTTCTTGAGCCCTTGCCAGTGATACTTTCTATGATTGTGATAAGTAAGCTGCTTAAGAAGCTCCCTACACCGATAGCACACAAGTACAAGGCCATGCCAAAGCTGCGTGTCGTGTCGGGTACCTGGTCATAGAAAAACTCTTGCTGCCCAACAATAGCAAAAACATCGGAAACTCCACTAAGTATGTACTGAGGTAGCAACCAAAATATAGTTAAAGGGATTGTAGATTTAGGTAAATCCAGTAATCCATGATCTCTTGATGCATCAATCCTTTTTCTCTCAATTATGGCTGCAGCAAGCATTGACAAAATGGACAAAAACAAGCCCACCCCAATCCTTTGCAGCATAGTTATGCCGCGTTGAAGCCCAGTAAGTCGGCTTACAATTGGAACAAACACTCTATCATAGAGTGGTAGCAGTATGAGGATAATGATAGTTGTAAAGCTCTGTAAAGAGGCTGCTGGGATCTCGAAATGCGAACCCATTTTTCTGTCCATGGTGCTTCCTTGTTTAGTAAAAAGAGTTGATGTTTGTGCAAATACTATCCCATATGTCAACATTGCCAACCAAACGGGCAATATGCGAATTACTAGCTTTACTTCCTCAACTTGTGTGACAGTGCATAGGTTCCAAGAGTTTTGCTTTGCCTCGAAGTCACCATGCTCTACAACAGCAGCTTTATCTAGAAACCTCAAATGATCTGTATGAGAAAGCTTTCGTCTCCCCAGATGTAGCAACTCCTTGTCATTGCTCTCATAGAGCAACTCTGAGCTGTGAGGGAGAGGCAAGCTACGCTTGCGAGTGGCGGCAACGATGACTTTGGCGATGCGCGTGAGGGGGCTTCCTGCAGGCAATTTGTGTCTGTAAAATTTGGTGCCAGCCAAAAAGGTAGCCAATGCAACCATCATGGCAATGGCAGGGATACCAAACCCGAGCCCCCAACTCACATTGTCCTGTATGTACACCAAGATTGTGACAGCTAGCAGGGCCCCCGTGCATATGCCAAAATACCACCAGTTGAAAAAAGATGCTTTCATTATTCTCTCTTTGGGGTCCTCTTCGTCAAATTGATCTGCACCAAAGGCTTCTAGGCATGGCTTCACACCACCTGTCCCTATAGATATCAAATACAATGAGAAGAAGAAAAACCCTAGTTGCCCCTTGCTTGCCCTCGGACATATTCCATCTTTCGTGCATGTAGGAGGCTTCAAAGCGCTTAGACTTACAGAAAGAGTCAAGAAGAACAATCCAACAACATAAATAACCGAGACTGTTGCAATGGTCCAATATTTTCCAAAATAGGAATCGGCAAAAAATGCTCCGACTAATGGGACGACAAGGGTTACACCAGACCAATTGTTTGCATTCTTTACGGATGAAGCCAGGCTCTCATGTAGCACTGTGGTCATATATGTTATCAAATTTGAAGCAATGCCATAGAAGGATAGCCTCTCACTAAATTCACCACCGATGATGAAGAGGGAGGCCTTCCAGCCACCAGTGAGGAAGCGAGAAACAGGGCGGCCCTTCAAGTCGACGGAGCCATCGGCTACCCGGCACTTGCACTCCTCCTCCTCCTCCTCCTCTTGCTCTTTGAGTAGCAAATCCGCTTGCGTGTTAGTCGCAAACCCAACTTGAGCGGTTTCCTGAGAGGAAAGCAGTTGCAAATCTGCTGGAAAAACATCTCTCTCCAGTGTGGGTAGTTGTGAATTCCGCATCTGCGACGGTGGTTCTGCCAGGAAGGCATCGTGGGCAGTTTCGAGTGATTGCGAAGCAAGCAATTCCGGCTGCAAGTCTGTTGTTGAACTGTCTTGGGCGGTTTTCTGAGGCGAAATCAGGGTCTCTCTAGCGCTGCAAGCTAAATGAGTTCTTCTGTGTGGCTTCTTGAAGTGCTTACCTGAAGAGGATGAACGTGCTACCTGCCACAATGGCCACAAAGGGCGCTTGGAGCTTGCTTGCTCGAGTGAACAAGTGCACTCCAGCGACGAGAAAGTCCTGCATGCCATCGAGCTCATTGTTCCCGTTCAACGAAATTGCCTTATCTACTCCTATCTAGTGGGATTGGCGCCGCGGGATCGACACCCGCGTCGATCCCGCAAGCGTCGCGCTCGC |
| **ADENINE NUCLEOTIDE TRANSPORTER 1 (ADNT1):**  TATTTACCATTTACCGTACATGTAGAGCCTCTTAGCAGTAGGCATTCTTGAAAACTAACCATTTACCATACATGACGAGTCTCTTATCAATAGGCATTCTTGATAGTGATAAAGAAGTTAAAAGCGGCTTTATCAGTAAGATTCCATGTACACCAAAACAAAAAAGTTAAAAGGTGCCTGCCAAAAGAGGGATGCCATTGCATTGATGCGGTTTTCACTTCAACAATCGTTAGAGGATCTAAGGCCACTCTAAACATATGCTCAATTACTTGTATGACCTAACAAATTGACTCAATATGTCACATTATACAGATTTACTTTTAGAACATTATATGAAAGTCACGGGTACTTCCCTTAAAAACCCAGAGCCTTCTATTATCATGGAAACGCCTGGATGAGCATTCCATCAGTAGCCAATGCGCGCATTTGTCCCTTCCAGATGACATCCAAAAAAACTCTTCCTGAGACACAAAAACCGGACCGAAAGATATTTGAGCACATTATGTATACTCAAAGTAGTCTGCATGTAATGGTACTCTCATGTGACCGCAAAAAAGCACCACTTCGGAACTTTATTATTACAAACTGGCCTCCACTGCCAGCAACTGTTTGAGTTTGCAAACTGCCTAGCTTACAAACACAGCAGTAATGCCTTTATTGAGCTTTTTGAATTAGGCAAAGCACATCTGAAAACTGCCCATGCCATAGCTACCTGATTACCGCACATAACCAATTGATCCAGGTATAATACTGTTCACAAGTGGAAAAGACTCCAAAAAGTTTTGGTGTATTTTTCCCATGAAGTCACTCCATTAAAAAATTGAAGAGCAGAGCTAGCAATTTGAGAGAGTTTGCTCTTTCACAATCAACGGCAGTAAAAAATTCCTGGCCTACTCCATGGCATCGTTCCACCGTTCACTCCACCTATGAGGTAAGAATTTGAGCAATTCAAGAGAAAACTACGAAAACCCTTGGAACTCCCAAAAATACATTCCGCTGCAGTACCCCTTCATTAACTTCTCTGCTACAAAACTTGAACCTTGTGAGTGAACATGTTTGCTTAATCTGAGATGCGGAACTCTACTCCAAGAAAGTCCTTCACCAGCTCATAGGTCACAAAAGCAATTGAAATTGAAGGGACCACCTTTACAGAGTTGGGAATCAGCCCTTTGTATAAAGCTCGAAAGCCTTCATTAGCAACTGTCTTTCTGAAGGCATCTGTCATACCAGTGTACTGCACTGTAGCTTTCACCTGCCCATCAGCTGTGATGATATTCGACGCGTCTCTCCATCCAACCATTTGCAGCCGTCTGCGTACTACATCCAGAGGATAAGCCACAGTCTGGCCAACCATACCTGCTGCAGCTCCACATCCAAGCCTTATCGGCACACTTAATTCCCCGTCCGTTCCTGATTCATCCATGTTTTTCTTTTTAACCCAGACTTTCAGAGACTCATACACGGAAAAGTTCAAGCCCACATAAGGAATCACTCCAATAACTGATGGTAGCCAGCCCTTGTACAAAGCCCTTGCTCCCTCCTCTCTGATGATTGTGGATGTAGCATGAACCATGCCTCGATAGCGATTTGGTGAGTCACTTGTCTGAACAGTAAGTCTTCCTCGAACCATGTCCATTGGATAGGTAGCAGACATAGCAATAATCCCAGCACATGCACCAGCTCCAAGGCGGAGAACAGGAGTTAACTCAGCATTTTCTTGTCCAGGCTGCTTTCGGTAAAGCCACAATACAGCCCTTGATGCCTGTTCGTAGCTGTAAAACTTGATTGCAGAGTTTGGAATGATTCGAGCACAATTTGCTCCGTTGCCTTTGAAAAATCCAGCAATGCCTTCATGTGCCCAAATATACCTTAAACCTTGAACTGTCCCATTGTATTTAGGATTCAGAGAATATTGAACCTGAAGAAGTATCTTGAGACGTTCAAGCGGTGCCACTGCAGTGCGTGAAACTCCACCAGCAACCCCTCCAGCAATCAGTGATTTGCAGACAGAAAGAGCAGAGTGTCCGGAGGCCTTGACATCTGGAGTGGCGAGCTTTGCCCCCTCCGCGATTGTGGCTAGTGTAGACGAGGTGGAGGCTTCTCCATTAACATATAAAGGAGGTTGTTGACAGAATGCTACACTTCCATGCCTTGCAGCATCATTACTATCAGATTGAACCTTGTCATACTCTTTCTGTAGCCTGGGAACTGCAGATGCTGCCTCAGACACCATGGATGATGGAATGCAACAACAATTAGCTGCAATTTCTTTTACAGAGACCGGGCGGCGATGGTGCTGAGTCGACTGCTCGGCAATGGAGCTTGAGAGCCGAGAAGCTGCAGAAAAGAAGGTGCGTGAAATTAGCGACACTTCATTAAGAGAAGAAGAACACGGCCCCCATTTTTTGCAAAGATTCTTG |
| **MITOCHONDRIAL PHOSPHATE TRANSPORTER 1 (MPT1)**:  GCATACCTAGCTAGGTGCGGTGAGGGGTAGGGGGCTGTCGACCCTAGGTATGCGGAGCCTCGTCTGCTGAAGCTCATGATGCTGAAACATAAGCTGGGAAAGGGGGCCCCTTTCCCACATTGTCAAGGAAAAATGCCCAAAAGCTCTTGTGACATACATTGGGGTCTCTCCTCAAGTCATGCCGAGATGCTCTTGCCGGACTTGAAGCCAATATGTGGAATGCCCCCTGTGTGGTTTTGTCGTCGGAGAAAAGCATCATTGTAGAAATATGCCTCTTCTCGAACCACATGCTGTGATGAAGTATCTCTAGCACACCAATATACCTTATACTTTCTACTTTGCTAGGAAACCAATAGCCAAAGGTTATCCAAGACATATAATTTTCCTTGAATTTGCTTTAGTAAACCACAAGCACCATAGAATCTGGTAAAGCCAAAATGTGGTTGCCTTTTCACTACAATTGGCCATATTGAAAGCTTCAGTGCTCTTGACAAAAACATTTGTCAAACTTCATTTGCATAGTGGGAACTCTGTATACATGATATACTTAAGAATCTAGAGTTCTAAAAACATTGCAGCAATATATATAATAATGCAAGAGAAGAGAGATGTTTCCAATTCTTCATGTCCATTATAACAGTACAAAAGACATTTTCGTCGTATGTTGTAGATAATGATGCAATATAGCATCCCATTTCTTATCACATTGTTAATTAGGCAGGATTTTTTTCTTAGACTTCCACCTTCTCTGTTTTTAATTAAGGAGTACAAATAAGTGAATATGTATGGCGTGTCGTTTCTAAGCGAGTTTGATCTCAAAAACTTGAATTAGATGATGACTTGCAACTCCAAAAAGTGTATCAAAATCGATCTGGAAAACTTGACGACGGCATGATAATTTTTGACTCCAAATAAATGACCTTGAAAACTTGAAGATGACATGATAATTTGTTTGATCAGGCGAGTGATAGATGCATATGGAAAGAGCGAACGAAGGCTCAAACAATTTGTATTGGGGTGCTCCTGTAAAACCAAACTAGTTCTTGTATGAAGTAAAGTGGGAAGCCTTTGTTACACAAAAAGGAAAGTTTGTAGAGCAGCTGCAATCATAAATTAAGGTTTTCAAAATGGATCCTGAGTGGCTAAACAAAGGGGACAATGCATGGCAACTGATTGCTGCAACCTTGGTGGCAATAATGAGCGTGCCCGGGCTGATGAGCATTTACGCGGGCGTGATGAGGCACAGGTGGGCCGTGAACTCGGCCTTGATGGCACTGTATGCGTTCGCAGCTACACTCATCTGTTGGGTGCTTTTTGCATACAAGATGTCGTTTGGAGAGAGATGGATACCCATATTGGGGAAGCCAGGGATTGCTTTGGGGCACAAGTACTTGCTACACCAGGCATATTTACCTGCATCGTCTTTCCATTACGAGAACGGCACGATCAAGACTGCAAAAGAGATGCCGATGTTCCCAATGGCGACACTAGTGTATTTCCAATTCGCGTTTGCCGCGATGGCGGTTGTGCTTGTTGCGGGCTCGCTTCTGGGACGAATGAATTTTACTGCTTGGATGCTGTTTGTGCCCTTATGGGTGACCTTCTCGTACACGGTCGGTGCGTTCAGTATGTGGGGCGGTGGCTTCCTTTACCACTGGGGGGTTATCGACTTTGCAGGTGGATTTGTCATTCACTTGTCCTCTGGTGTTGCTGGCTTCGTTGCTGCTGCTTGGGTGGGGCCAAGGTTGGAGGAGGACCAAGTACGTATGGATGAGAACTTTAGCGTGCCGCTAGTGGGGGTTGGAGCGGGGCTCTTGTGGCTGGGCTGGACGGGCTTCAACGGCGGTGCGCCCTACGCCGCGAGCCTGGACGCCTCCATGGCTGTCATTAACACTCACATCGCTACTGCCACCAGTCTCCTCCTCTGGACCATCCTCGATGTTTTCTTCCACAGAAGGACTTCTGTCCTCCACGCTGTTCAAGGCATGATAGCCGGCCTTGTCTGCATCACCCCGGCCGCAGGTGTGGTGCAAGGGTGGGCAGCTATTATAATTGGAGCAACTGCAGGAGGCATAACATGGTATACAATGATCAAGTTGGAGACATGGGAGTGGCTAGACAGGGTGGATGACACACTACGGGTGTTGCACACACATGCGTTATCGGGGTTGATCGGCGGCATTTTAACAGGGCTTTTAGCAGATCCTCACCTTTGCAATTTATTCTTATCTGTGAAAGGCTCTAAGGGTTCCTTTTATGGATCTGCTTCTCAGTTGGGTAAACAGCTTGTGGCTGCTCTATTTATAATTGTTTGGAATGTAGTTGTGACATCCATCATTTGTTTTCTTATACAAATCAAAATTCCTTTAAGAATGAAGGATTCAGAATTGAGGGAATATATAGAGGATGTTTATCCTAGGCCTAGATTTGTAGGACGAGATGAAGGAGCAGATGCAATACAGTTGTATGGTAGAAGGCTCCACCAAGCTCCATTAGTAGGTGCTGAGGAGCCTATTGCTGTGCTTGCATAAACTTATTTCTTCTTTCCTATGACACATTAAAATTCATTAGTCTTGTGCGATCCCATAATAAATAGGCTATTGAAACAATGGGAATTTTCCAAATTCAAGGCTCCTCTTCATTGTATAAGTTTGAGATTTTTGTAAAATTACCATTGGTAACCAGTTAGATTTTTGAGTTACCATACATAAAGTTTTCCAATTTTAGGGTCCTTTAAAAAAAA |
| **AMMONIUM TRANSPORTER 1 (AMT1):**  CGGCAACAATGGCTTCATTGGGCATCATTTTTTTGGCCTCGCGGATGTGCCAAGCCAGTTTGCTGGAATGGATTACAGCTTCTTTCTTTATCAATGGGCTTTTGCAATTGCAGCAGCGGGTATTACGTCGGGATCGATTGCAGAGCGCACGCAGTTTGTCGCATACCTCATCTACTCATCTTTCCTCACTGGCTTTGTTTATCCTGTAGTCTCTCATTGGGTCTGGTCCGTCGATGGATGGCTTAGCGCTGGTAACACCAAAGACCTCTTGTTTGGCAGTGGAGCTATAGATTTTGCTGGCAGTGGTGTTGTGCATATGGTGGGAGGAATTGCTGGCCTGTGGGGAGCCCTCATTGAAGGCCCTCGAATAGGCCGTTTCGACAACAACGGACGCTCAATGCAACTTAAAGGTCACAGTGCTACTCTTGTTGTGTTAGGTACATTCATGCTCTGGTTTGGATGGTATGGATTCAACCCTGGCTCTTTCTTGAAGATCTTAGTCTCCTATGATGGAAGCTTCAAGGGCAATTGGACTGGTGTGGGAAGGACGGCGGTGACGACGACACTAGCAGGCAGCACGGCAGCCATCACCACTCTCTTTGGAAAGAGATTAATTGGAGGACATTGGAATGTGTTGGATGTGTGCAATGGCTTATTGGGTGGCTTTGCTGCCATCACCGCCGGATGCTCTGTGGTTGAGCCGTGGGCTGCGATCATATGCGGGTTTGTCTCCGCATGGGTGCTCATCGGATTCAACATCCTAGCTGACAAATTGAAGTTCGACGACCCCCTTGAAGCTGCACAATTGCATGGAGGATGTGGTGCTTGGGGGCTGATCTTTGTGGGGCTCTTTGCAAATAAGAATTATGTGAGTGAAAGCTATGGAAGAACGGGATCGACGCCGCACGGGCTCTTTCTGGGGGGTGGAGGAAAGTTACTTGCGGCGCAACTGATAGAGATAGCAGTAATAACGGCGTGGGTGAGTGTAACAATGGGGCCATTGTTCCTAATACTGCACAAGTTTAATCTATTAAGAATATCAACAGAGGATGAGCTGCATGGGATGGACCTTACAAGGCATGGGGGGTATGCATACTATCATCATGAGGACAGTACAAGTCCTACAAAAGAGACACCACCTAATGAGAATAAGAAAGCCTCTGCTATACAGTACGCAGTCTAAGGCTTGTTAAAGTTCTGCTTGTACTTTGCATAGTTATTACTCCCCTTCCACTTTGATTCATCTTTGTTATAGGGACTCCACATTTTAAACACTTGAATGATAAACAGCCCGTCATGTATGGTTTTTTTTCTTTAAATTCCATGATATATTATTCATTATTCAAAAAAAA |
| **AMMONIUM TRANSPORTER 2 (AMT2):**  GCATACCTAGCTAGGTGCGGTGAGGGGTAGGGGGCTGTCGACCCTAGGTATGCGGAGCCTCGTCTGCTGAAGCTCATGATGCTGAAACATAAGCTGGGAAAGGGGGCCCCTTTCCCACATTGTCAAGGAAAAATGCCCAAAAGCTCTTGTGACATACATTGGGGTCTCTCCTCAAGTCATGCCGAGATGCTCTTGCCGGACTTGAAGCCAATATGTGGAATGCCCCCTGTGTGGTTTTGTCGTCGGAGAAAAGCATCATTGTAGAAATATGCCTCTTCTCGAACCACATGCTGTGATGAAGTATCTCTAGCACACCAATATACCTTATACTTTCTACTTTGCTAGGAAACCAATAGCCAAAGGTTATCCAAGACATATAATTTTCCTTGAATTTGCTTTAGTAAACCACAAGCACCATAGAATCTGGTAAAGCCAAAATGTGGTTGCCTTTTCACTACAATTGGCCATATTGAAAGCTTCAGTGCTCTTGACAAAAACATTTGTCAAACTTCATTTGCATAGTGGGAACTCTGTATACATGATATACTTAAGAATCTAGAGTTCTAAAAACATTGCAGCAATATATATAATAATGCAAGAGAAGAGAGATGTTTCCAATTCTTCATGTCCATTATAACAGTACAAAAGACATTTTCGTCGTATGTTGTAGATAATGATGCAATATAGCATCCCATTTCTTATCACATTGTTAATTAGGCAGGATTTTTTTCTTAGACTTCCACCTTCTCTGTTTTTAATTAAGGAGTACAAATAAGTGAATATGTATGGCGTGTCGTTTCTAAGCGAGTTTGATCTCAAAAACTTGAATTAGATGATGACTTGCAACTCCAAAAAGTGTATCAAAATCGATCTGGAAAACTTGACGACGGCATGATAATTTTTGACTCCAAATAAATGACCTTGAAAACTTGAAGATGACATGATAATTTGTTTGATCAGGCGAGTGATAGATGCATATGGAAAGAGCGAACGAAGGCTCAAACAATTTGTATTGGGGTGCTCCTGTAAAACCAAACTAGTTCTTGTATGAAGTAAAGTGGGAAGCCTTTGTTACACAAAAAGGAAAGTTTGTAGAGCAGCTGCAATCATAAATTAAGGTTTTCAAAATGGATCCTGAGTGGCTAAACAAAGGGGACAATGCATGGCAACTGATTGCTGCAACCTTGGTGGCAATAATGAGCGTGCCCGGGCTGATGAGCATTTACGCGGGCGTGATGAGGCACAGGTGGGCCGTGAACTCGGCCTTGATGGCACTGTATGCGTTCGCAGCTACACTCATCTGTTGGGTGCTTTTTGCATACAAGATGTCGTTTGGAGAGAGATGGATACCCATATTGGGGAAGCCAGGGATTGCTTTGGGGCACAAGTACTTGCTACACCAGGCATATTTACCTGCATCGTCTTTCCATTACGAGAACGGCACGATCAAGACTGCAAAAGAGATGCCGATGTTCCCAATGGCGACACTAGTGTATTTCCAATTCGCGTTTGCCGCGATGGCGGTTGTGCTTGTTGCGGGCTCGCTTCTGGGACGAATGAATTTTACTGCTTGGATGCTGTTTGTGCCCTTATGGGTGACCTTCTCGTACACGGTCGGTGCGTTCAGTATGTGGGGCGGTGGCTTCCTTTACCACTGGGGGGTTATCGACTTTGCAGGTGGATTTGTCATTCACTTGTCCTCTGGTGTTGCTGGCTTCGTTGCTGCTGCTTGGGTGGGGCCAAGGTTGGAGGAGGACCAAGTACGTATGGATGAGAACTTTAGCGTGCCGCTAGTGGGGGTTGGAGCGGGGCTCTTGTGGCTGGGCTGGACGGGCTTCAACGGCGGTGCGCCCTACGCCGCGAGCCTGGACGCCTCCATGGCTGTCATTAACACTCACATCGCTACTGCCACCAGTCTCCTCCTCTGGACCATCCTCGATGTTTTCTTCCACAGAAGGACTTCTGTCCTCCACGCTGTTCAAGGCATGATAGCCGGCCTTGTCTGCATCACCCCGGCCGCAGGTGTGGTGCAAGGGTGGGCAGCTATTATAATTGGAGCAACTGCAGGAGGCATAACATGGTATACAATGATCAAGTTGGAGACATGGGAGTGGCTAGACAGGGTGGATGACACACTACGGGTGTTGCACACACATGCGTTATCGGGGTTGATCGGCGGCATTTTAACAGGGCTTTTAGCAGATCCTCACCTTTGCAATTTATTCTTATCTGTGAAAGGCTCTAAGGGTTCCTTTTATGGATCTGCTTCTCAGTTGGGTAAACAGCTTGTGGCTGCTCTATTTATAATTGTTTGGAATGTAGTTGTGACATCCATCATTTGTTTTCTTATACAAATCAAAATTCCTTTAAGAATGAAGGATTCAGAATTGAGGGAATATATAGAGGATGTTTATCCTAGGCCTAGATTTGTAGGACGAGATGAAGGAGCAGATGCAATACAGTTGTATGGTAGAAGGCTCCACCAAGCTCCATTAGTAGGTGCTGAGGAGCCTATTGCTGTGCTTGCATAAACTTATTTCTTCTTTCCTATGACACATTAAAATTCATTAGTCTTGTGCGATCCCATAATAAATAGGCTATTGAAACAATGGGAATTTTCCAAATTCAAGGCTCCTCTTCATTGTATAAGTTTGAGATTTTTGTAAAATTACCATTGGTAACCAGTTAGATTTTTGAGTTACCATACATAAAGTTTTCCAATTTTAGGGTCCTTTAAAAAAAA |
| **PLASTIDIC NUCLEOBASE TRANSPORTER (PLUTO)**:  TGTGCGCGCGCGCGTGTGCGCATGAGATCCTCTTTACTGTAGATACGTGCGCTCTCCTCCACCATTGTCTTGCAAAGCAGCAGGACATGGGAAGATATGGCACGAACGAGCAAAGCAGCTGCATCACACTGCATTCTCAGCAGTAACGCTTCTCTGCTATTCATCAACAAGCACAAGCTCTGCAATTTCAAGCTCCCATGTCCTCCTTCACTCCGCTCTTGCAGAAAGCCTCCTCACCTCGTGCGATCACACAGAGAAGAGAGAGTGCCCACCTCCCATACAAACCCTACCAATGGGCCTTCATCTTTCTTTGCGCCTGCCTCCGAGCCCTTGCTTACAAGCCCCCCTCACCCCACCTTATCTAATGAAGACCTTCTTCCTACTGCTCTCTCTCAGAGAACATTCTCAGCGTGGGATATTATCAGCTTGTGGGTAGGCCTTGTTGTTGGCGTGCCTTCGTATTACCTTGCCGGCAGCTTGGTTGAGCTTGGCATGTCATGGTGGCAGGGTATCTTTACTGTAATGGCAGGCAACTTCTTACTCTTTTTTCCTCTTGTTTGGACAGGACATGCAGGCATTAAGTATGGCATCCCATTCCCTGTCATGGCTAGGGCATCCTTTGGCATCCATGGTGCACACATCCCAACTATTCTTCGAGCCCTTGTCGCATGTGGGTGGTTCGGCATTGAGACATGGATAGGTGGGCAAGGAATCTATGTTCTCTTGAATGCCCTCTTACAGGGGAAACTAGCCAACTCTTCCATAGTATTGATGGGCACGGCCCTTCCCGAATGGGCTTGTTTCTTTGCTTTTTGGCTACTTCAAGTGGGCATCATCTGGAATGGGGTTGATAGTATACGCCAATTTGAGAAATATTGCGCGCCTATATTGATAGTTATGTCTGCTGCCCTCTTGATATGGGCATACTCAACAGCCGGTGGATTTGGGGCCATGTTATCTGCTTCGTCGCAATTTGTAGCAGGAGGCTCCAAACAAGGGCAGTTCTGGCAGGTTTTTTTTCCAGCTCTTACTGCCAACATTGGTTTTTGGGCCACCTTGAGCTTGAACATACCAGATTTTACAAGATATGCCAAAAGTCAAGCAGACCAAGTTGCTGGCCATATAGGTCTTCCAGTTTTTATGGGATTGTTCACGTTTTTGGGTTTGGCTGTAACTTCATCTACTGAAATTATTTTTGGCCGTGTCATATCAAATCCTATTGAATTGCTGGGACAAATTGGTGGAGTCATACCAATCCTTACGTCTTTCATCGGTCTCACATTGGCCACACTCACCACAAACATCGCTGCAAATATCATGGCCCCTGCGAATGCATTTGTCAATTTGAACCCCACTCTCTTCTCTTTCAGAACCGGGGCTCTTCTTACTGCTGTATTAGGGGTTATTTTTGGACCATGGCAATTTATAAAGAGTAGTCAAAGCTTCATCAGCACATGGTTAGTGGGATATTCTGCCCTTCTTGGGCCACTGAGTGGCATTATTCTTGTTGATTATCACATCATTCGGAAGCGTCATCTTGATCTGGATGCTTTATATTCAACAAGTCGCACTGGAATGTACTGGTATACCAAAGGCTTCAATTTTATTGCCATAGGGGCTCTGTTGCTGGCTGTCGTTCCATGTATCCCAGGTTTCCTTTACACGATAGGTTTTTTGAAGAAGATCCCAAGCATTCTTTTAGCTGTGTACAACAATGCATGGATTTTTGGTTTCTTAGCTTCCGGGCTTCTTTATTGGGTTATGTGCATGCTTTATAACCTCTATGCAAGCTTTGCTGAAAATTTCAGCAAAACTAGTTGATTTCTATTGTGGGTTGAGCTCAGCTGTGAAATTTCTTAAAAAGAGCCCGTCAAAAAATTTCTTACTCTTTGCTACACTTTTCCTTATTGAACATAACTAAATTGAGACCAACAATTGTAAGCAGTAGATCAAGCAATGTTTGCCACCTC |
| **MULTI-DRUG AND TOXIC COMPOUND EXTRUSION (MATE)**:  AAGAGGAGGAGGAAGAAGAAGGAAGAAGAAAAAGGAGCCCTTCTTTTCTGCAGGCTTCATGCCCCATTCCTTCTTTTTCTAGCTTTCCATTGAAGCTTAACATGAAGTAGGTGTGCATTGTAGCTTTTGAAGCTTATGGACTATTGTATATTAGCTCAAGAAGCTGGCATTTTCAGTTCAACCCCATCGGCAATGGTCATTGGGCTTGTCTAAAGAGATAGTGATTCTGCTCATTTAAATGCTAGCTGACATGAGCAACCTACATTTATGGTCTTGTCATGCCAAAGCGCTTTTCAGCACATTTATCACGCTTCTCAATGAAGGTAGAAACACAACTGTCAAAGCTGAAAGCAAGGAAAGTAATACATGCTGCTTAAAGCTTTTCATGGGGGGTGCCAGCAATGTTTTTAAGGGTGATGAGCTTGGAAGGGAAATCGCTATCATTGCTTTTCCAGCCTTGGTTGCACTGGCAGCTGATCCTCTTGCCTCGTTAGTGGATACAGCTTTCATTGGTCAGCTAGGTTCTGTGGAGTTGGCTGCTGTTGGGGTATCCATTGCGGTTTTCAACCTGGTATCAAAGCTACTCAATTTTCCTGTGTTAAATCTCACAACATCACTTGTGGCAGAAGAAGACGCTACAGATTCAGGGAATGTGTGTGAAGTTGAGCTGGAAACTGGTTTATCTGGATGCTCCAATCCTGAAGAGAAAGATGCGTTTATCTCAATCAAAGATTCACAGAATCCCGTTGATGAGAATGTTACCAGCAAGGTAATTAGCAGTATCAAGCAGAGCAGTGGCACTGAGCAAAAGAGCTTACCGGCTGTTTCAACAGCACTAGTTGTAGGCTCCATGCTTGGATTTTTTGAGCTTACTGTTTTGACATTAGGATCTGGACGGATTTTGGATCTCATGGGGGTTACAGTGAGTTCTAACATGCGAATACCAGCTGAGCAGTACCTTGAGTTACGTGCATTAGGTTCTCCTGCTGTTGTACTATCCCTGGTGGTGCAGGGTGTTTTCCGTGGTTTTAAGGACACTAAAACCCCTCTTTTTGCCACTGCTTTTGGAAATGTTGTCAATATGGTACTGGTTCCCATTTTGATGTTTACGTTTGGTTATGGTGTTAGCGGATCAGCGGTTGCCACCGTCATATCCCAGTATATTATCGCTCTGATCCTTTTGATGAAGCTCTGTAGGAAAGTGGTGCTTTTTTCACCAAGGCTGGGTGGACTTCAGTTTGGTCTGTTCATAAAGAATGGCAGTCTTCTATTAGCTCGTTCAGCTGCAGTGATGCTCAGCTTGACTTTAGCAACATCACTGGCTGCAAGACAAGGTGCTATCCCAATGGCTGCGCACCAGATCTGCATGCAAGTGTGGCTTGCAACCTCTCTTCTTTCAGATGCTATAGCTCTTGCTGGCCAGGCCATTATCGCCAGTGCTTTGGCTAAAGGTAACTTTGAGCTGGCAAAGAGTGCTGCTTTTAGAACACTACAGATTGGTTTTGCCTTTGGCCTTGGTTTATCTGCGATACTTGGTGTTGGGCTTAGCACATTTTCCAAGTTGTTTACAAGCGATCGTGCGGTGTTGAATTTTCTTGCCCTGGGGATTCCTTTTGTGGCTGCTACCCAGCCAATAAACGCTGTGGCATTTGTGTTTGATGGCCTTCATTTTGGAGCCTCAGATTTTTTGTATGCAGCATATTCTATGATTATTGTTGCAATTTTAGCTTCGGGCTTCATGCTAGTTGCTGCTCCAATGTGGGGCTTTATTGGCGTGTGGCTTGGACTTAGTATGTTGATGACATTAAGGATGCTTACTGGGTTTTTGAGGGTAGGCACATCAAGTGGGCCTTGGAAGTTTTTGAAGACTTTGTGAATGTGGTATTACCACACAAAAACAGGGTAATGTGGTGGCTGACATGTGGCTTTGCTGAAGCTACGACCAGAGAAATCGCACTTTTGAGTAGGCGTTTCAAGTTTTCATTGCAGTCCTAGATCCTTGGTTTCTCATTCTAGGACCTGCAGCAACAATATTAGTTTACACAGTTGAGCTCTGTAGATCATCCACTGCAAAATCCTGGAGATGGTGAGATCACATGGTCAGCTGCGAGGCTGATTGTATTATCAGCTCTCAGTGTATGCATCATCCCAGTATTGATGTTTCCTCGGACTAAAACTCTGTGTTTGCAATAACTCTTGACTTGCCGAGTGTGGGAGGCAGCTCTAGCCCTGAGGGTTTAATGAATGCTGTTTTGGCATGAATAGCCTGGGGGTGTGAGGCACCTTGGAACTTCTCACAAGCCTGGTAGAGACTGAAAATACAAAAACAAAACCAGCTTCTTCTTCTTCCTCTATCACTACACCTTCACTGCCAGTATATTAATAATATACCTACATTTTCAATATATGTGGCTACACTCTCATCATTCTCCCCATTGACTTTATATAGCTCCTACAAGTTTTTGGGCTTCTGATTTGGTAGGATATTTGCATTGTATCTTTGTTTTTTAAATTTTTACCCACCATCCAGTTTAGTAGCAGAAAACTAGGTGCATTATGGGCATCAAAAATGCCCATTATGACGCTATCGGTATCATATATTTGAAGACCTCTCCTCTCTTTTACAGGTGAGGGTTTGATTCTA |
| **MAGNESIUM TRANSPORTER 1 (MGT1)**:  GGCACACCAACCATAGATTATCCTTGTGGGCTGATCATACATTGAATTCTTCTGTTGTTAGCACATCAAACATAATTGATAAAAATCAAGTATAACCATACTATTGAAATCAAGTTAAAAAAAAATTGGAGGAGAGAAACTTCTCCCTTGCTAAACTTAAAGATATTCATTCATTTTTTAATATCCTTCTGCCAACATGCACTTTGTGCATACCAACTTGCCTCCTTATGGCACCTCCCTACAAAGAACAGATTGGTATTCTCTCAATTTACACTTGAGGCTATTATGAGCACAGTATAATGCCATGCTCCTATATCATGATAGAGGCATCAAGCCTTTCCACTTGAAAAACAGCAGGAAAGAGAAAAATATCAACAGGCCGCATAGTCCGGCGATGCCAATGACCCACTTGAAAGCCCTCGGCTCGTCAAATATTGCAATTTCGATGTTCATACCAAACACTCCCGCCACAACCCCATAAATTGCTACAACAAAGGTAGCAGTCGTCAAAAGCAGCTCAAATTGAATGAGCTGGTTCCGAACATTGTCCAGCTGAATATTAATAAAATCTTCTGTATCATCAATGTACTGCTTCAGAGATGTTAACTTGTTGAGTGTGCTATCTACAACAACAAAATAGGCCTCCAAGAGCATCTCCAGTTGTACTATATTCTCACTATCATTCTCAGAGCTTCGTATGCTACTATGTCTGCTTCTAGTGTGACTGAACGCATTGCTGATGGTCTTCTCAAGTGTTCTATGCTCTGTAGGTGAGCAAACCGGAGATACCGGAGCTGACAACGAAGGTCCACCTCCAAGCTGCACATAATTATCTTGATAGAAGGAGGAATCCATTCGTTCTTTTTTCTCTGTTAGATACATCTCAGCCATGTCCCCATCATCATCCATTAATTGCTCAACCTCATCTCTTACCTTTTGCACACGGGAGGTCAAAGTGACGAGCTTGCTCTTGAGCCTTCGTACACGTTCCAGATTCAGTGTGTTGACTTTAGAGGTTAGCTCATCAAGCACAGGATAAGCCTCCACCTCCAATTCTGTGGCCTGACTGTCCAAAAATGTGCATGCCGCCTCTAAAGCCACCTCCAACGCTCTAAATTCAAATGGAAGGTTATCAGCCTCACCAAGCTGGAAGAGTCGAAGACGTGACATAACATCACTAGCAGTAGCACCCAAATCAAGATCCCCTGCGTGTGAATGCATGGATGTCCGCCTCTTCAAGCCTTGCGCTTCATTCTTTACTGTTAGCCTTTTTTGCAACTCGGTAACATACTGCAACACATGGCTATCGAGAGAGTTGAGAAGCAGGACCTCATCTGCTGTAATGACACATCTAATTTGCTCTAAATTCACCACAATGGCTTTCTCGCGGCCTAGTATTGTAGATGGATATACAAACAGGGGATCAAGGAGTCGTAGGTCACGGGGAGGTAACTCACATCTTCGCATTATAGTCATCTTGTCCACCTCTAGGAGTTGTGAGTTCCCAAATTTATCAATTCGAATCCAATGGCGTATGCTATGTCCTCTTTTCTTCAGATCTACTGTTGAAAACAGGGGGCGTGCAGGCTGAGAGCCTGTGGGTGGAGGGCTTGCATCGTGCATCCCCGGGCGAGGCCGCAAGAGGGCAGCTTTCAAGTCTGACATGAGAGCAAAAGAGGAGCTTTGAAAAAACCAATATACTACACGCGCTGGCGATGAAACTCATACATACATATTGACAAGGATGGGTATGCATGTTGGTGCATGCTGGGGCTGCAATATAGCCTTTTCATTGACCACATTCACTTTCTTGTTACATGCAATGAATGTGATGCGCTTAAAGGCTCTGAGTAGTGATGGTGAGGCTAAACTTTTACACAGAATCCACTTGCTTGACAAGCTCTTCTTCCTTCAAAAGACATTGAATAGCATGACATTCATCAAATTATGTTGCAAATGCTCATGCTAAGCATCTCCTGCATTCTTGCACCTATATCGCCAATGCCCTGAAATCTTACACATGCAGAGATGCAAAGTTACATGTAGAGTTCTCTGTTCAAGCTTCAAAATTGGTGTGCAAATACAGATATATGAATAGAAAGGAGGGTTCTGCGTGTACAGAATGAAGATTTGATTAAGTAGTGCCAGGAGCTTCAAAGATCATTCCGCCTATGCCCAACTAGGGTTTCGATGTGAAAAAAATAGGAGGGCTCATTCAATAAAGCTCCATGCACAGGGAAAAGAAGCCATGAAAGCACAGAGAGAGTGCGCAGACGATGATTCCTGCCAAGTGGACCAACAGAAATGCGAGGAGGAGATGAGCGAGCAAAAAGCTTGGTGGTAGCCTTT |
| **UDP-GALACTOSE TRANSPORTER 3 (UTR3)**:  TGCTGGTTTTTAATTGTTTTGATCACAGAATGTCGAAGAGGTCGGGACCTTCGCGTCAAAAATGGTGTTCTTGAGCTATTGATTGCTTCTGCGTTGCTTTCCTCTAGTGGGCGATGGGAGCTTCAGGTCTTGTTGCAGGGCGCGTCCTGCTTCTTGGCTTCTGCATTGTTGGCATCTTCTCCGCATACATTACTCAAGGCGTCCTTCAAGAAACTGTATCCACAAAGAAGTTTGGCCCAGATGGGAGACGCTTCCAGCACCTTCCTTTCCTCAATTTTGCACAAAACGTTGTCTGCTTTGTCTGGTCGCTATTGATGATTGCTGTGTGGACCAAAAAAAGCAACAATCAAGCGCCTTTGTGGCTGTACTGGAGTCCAAGTGTTACTAATTCTATTGGACCAGCATGTGGCATCCAGGCATTAAAGTACATTAGTTATCCTGCTCAGGTGCTTGTAAAATCTTCTAAAATGATTCCAGTAATGCTAATGGGGACGATTGTGTATGGAGTCAAATACAAGCTGCCAGAGTACATATGCACGTTCCTTGTAGCTGGAGGAGTCTCCACATTTGCTTTGTTCAAGAGCAAGGCGAAATCAATTCCAAATCCAAATGCACCTTTGGGTTATAGTTTATGCTTTCTTAATTTGGCTATGGACGGTTTCACCAACGCCACACAAGATTCTATTTCTGCTAAGTATCCTAAAACAACCGCTTGGCACATCATGCTTGGAATGAATCTATGGGGCTCAATCTTCTCCTTTTTCTACATGTTTGCTTGGAGTGGAGGTGGTGGAGTTGAAGCCGTTAGGTTCTGCAAGGAGCATCCTGATGCTGCTTGGGATATTCTGCTCTTTTGTTTATGTGGTGCAGTGGGCCAAAATTTCATCTTCCTCACAATAAGCAAGTTTGGATCTTTAGCCACAACAACCATCACTACAACTCGAAAATTCATGAGCATTCTTGTCTCTTCCTTGTGGAGTGGGAATCCATTGTCCCCCCAGCAGTGGACTGGTGTTATGATGGTGTTTGGAGGGCTTTCAGTGCAAATCTATCTCAAGTGGCAGCGCAAGAGCAAGCAGGTTGTCGAGAAACGAAAAAGTTGAGTGTATTTTTCGTTGATGTCGAAAGGCATACCCCAATTATTCTTTACGAACTCTTGCATTAATCATTTATTGCAAGTTATACAAGAGGTTAGTCTTGGAAACATGGGATCCTTCAGAGTGTGGATCTTGTGTGTGTAAGCTAGTAACAGGACATCTATGATAAAGTTCTAAATGAAAGGGATAGAAACAAGTACAGGGAGAATACATATTGAGCATGTACTATGTAGACAGACATGTACATGTTTAAAGTCATGGGCAGCATATTCTTTTTGCTGGAGCAAATCTTGTAAGCTTCCCAGCATTTTTTGTCTTAATACAACAAAGCAGACATTGCTGCCAAGGGTTGATCTTGTCAATGTGAACTTTGCTAATTACCGCTAGATCGTATGTGTTTGGTAAAACTGTACTTGATACTGATTATGAAGGAAATGAGAAATGAAGGTGGTG |
| **TONOPLAST SUGAR TRANSPORTER 2 (TST2)**:  CTTATTCATGGTTGTTAAAGATAAAACCAAAAGAGTAGTAGGCCCCAACAGCATCCCCTCTCTAGATTGCAACATCAAAATTTTAACCATATACAAAGTGATTGGCCCCACTTAGCATGACCCAATCAGATGGATTTACATCAGTTTACAAAAAACATGTTCCATAGCATTACTATAAGGCAGTGAGCAAGCAAGCTCACTTGCTGCAGGAGTTTAGCTCTGTCCCCCTCCCCCCCCCAAAAAATGAGATCAAGCCTAGCCCTGTTAAAGCTCAAGATATGTCAAAAATGTATGGTTGGATCCTGCTTCATGCCTCAAAACTAAGGAGAACCCTCTTATTCTGTATGTAGCCAAAACCCCCCCTCTCTCTCTTCAGCTTCTCGATCACTCCCCCCGATAAGGAAAACCGATTATTTAACTGTCAAAGCTCCTGCACACTACATTACCAACCCCTGCTCAAATGCAAGCACCTCAAGTGGAGTATTAGGGACATCATGTGGAGTATAAGGGACATGATGTAAGGCATTTGCTGCGGTATCAATCCCCGTCAGTCTCACACGATGATGCAGCCCATCTTACACGTCGCCTTCGTTTTCGATGGCTGCTGGCTTCTTTTTCTCTGCTGCCGACAAAGCAAAGAATTCCACTATGACTTCTAATGGCATGCCTTTGGTCTCTGGCACCTTGAAGTAGACATATCCCCAGGTTATGAAGCAAAATACGGCAAAAATTGCAAACGTGTTTGCAACACCAATGGCTGAATCCAAGACCGGAAAGAGCTCTGTCACTAGGATATTGGTTATCCACATGGCAGCCTGGCATATAGCGATACAAACGCCTCTCACTCTTGTTGGGAAAATCTCAGCACATATCATGTTTGGGATGGGACCAAAACCCGCCATAAAGAAGATGACATACATCACCACACTTAGAACAGATACAGTAGCAAAAACGGCATCGTTTGTAGGCACAAGGTTGATGATGATCAAACACAGAAGAGTTATCACTAAGACTGGTAAGGCGTGTAGAAGGATTTTCCTCCGACCGGCTACATCCATAAGGCGCATCGACATGATAATGAAAGGAAGTGACACCAGGCTAGTAGCTGCACTGGCTAGAATAGAAGCTGAATCGGATCCAATGCCCATTTGAGACAACACCACATCTGCACCTGTTTCCTGAAGTATCTTGGGCGTGAAGCTGAGAACAGCACTGATACCACCGAACTGCTCAAGTATCTGTAAGGTAACTCCAACAATAAGAGCTTGTTTAACACCACCTTCAAACAATTCAGACCATGCTGGACCTTTTGTGGCGGTCTCTGCCGGATGTAACAATGCAGGTCCAACAAGGTTCTCTGATAAGATCTCCTTTCCATACTGAGATGGCCGGCTAATTAAAGCTGCGGCCGGAACAGACTCTATTTCACCCACTGTACTACCAAACCGCGGAAGCGAGTATGAAGAGCCCATTCCAGTCCCAGCCATTTGTGGTTCCTGGAACAAATATATCCTCTTATAGCTTCCATGCTCTGGTTTTCCATCAGTCCCATCTGGACCTGCCAATTGAAAAGCCAACTGCCAACCGCCACCAACGCCCATATTCCCAATCGACCCAACAAAGCCTTCATGTGGTGCAACGCTAGCCGCTACAGCATCATGAAAATTTCCTTTGATAGATTTAAAAGAGTCACCTCTGTGTAGATCTGAGACATTCCAATGCTCACTGCTGCGTCTTGAGAGTAGAGGGCTTGTCAAGTCATTATCAATATCACTTGTGTCTGAATGATAGCCATTGGTTTCTTGCAGGCTGCCCCCATTTTCTTCATCCTCTCTAATGTCATCAACAGCTTCCAAGTGGTGTCCCTGCACATGGCTATGCAGTATGCCAGGCAAATGATTAACGAATGAACCCTTAAGGCTTCCCATCAAGGTAACAGTTGAATCCATAAAAGGAAGACTGTTCGCGACCACTGGAGTTCCAATGACACTAGGAGGTCTTGAAAGAAACCCACTTGATCCAGTAAAGCTTGATATAGGTTTTGCAATCCACGCTCCACCATCATCAGGAGTGAAAAGTGTTATGGAATCGTCTTGAATACCAGTCAAGTCATCAGGGATAACGAAATCAGTTGGCTGAATGATATATTCTTCCAAGAACAAATCCTGTCCAACACCCAGACCTTCCACTAAAAGAGCCATCTCTCCTGATACATCCTCCTTATTGCGAAGCCGTTGTAGGACTTGTTTAGCTTCTTTTGTCCTACCCTTACTAACAAGCCATCTTGGTGACTCAGGCAAGTAATAGAGCCCGAGAATCAAGTAGATAAAAGAAGGAATAAGCGTCAGCCCAAGCATCATCCTCCAATTGGGACTGCTTGTAAGAGAGATGCCGAAAACCATACAATATGCCAGAAACATTCCTGAAGTGCCGAGAAGTTGAGGTAATGTATTCAATTCTCCTCGAATTTCTGCTGGAGACACCTCAGAAATGTACATGGGTGCCACCGTCACAGCTAGTCCAACTCCAACACCATCTACTATGCGAGCTGCCAATAGCAAGTATACATTTGGGGACCACAGCATAAGTAAAGAGCCAATGCAATATAGCGTTGCAGAGATGCATAGTATCTTGCGTCGGCCAAGCCAATCTGCTCCTGACCCTGCAAATATCGTGCTAAGAGCAGCACCTATAAGTGATGCAGCTGCAACAGCACCTTCCAGAACTGGCTGTACATCCAAGTTGAACTCGGGCTCTATGTAGAGCAAAGCACCTGCAAGAGTTGCACTGTCCCACCCATTGAGAAGGTTGCCAACAGCAGCTACGGCAGCGACAATCTTGGTGGCCATCATTTTTGCGGGGTGCTTGTGGTTTCTAATAAAAATTGGCTAGGGGGGAACTCAGACCTCACCTTAGAGAGGGATTTGTACAGACGAGGAGCAGAGAGAGAGAGAGAGACTCTATTATTGAAGGTGAGGTCTGAGGGCAAAGGTGGGCATGGGAGGCAGTGCTCCTTGTTCCAAATGGACCAAAAGATACAGCGAAGGTTTAGAAAG |
| **SUCROSE TRANSPORTER 4 (SUC4)**:  AGAGAGAATGCTGATAGACGATCTTACATTTCAGTGAAATAATTGAATATCCTATACCAATTCTCCTTCCAAGGGAGCATTTCTTTACATCAATAAGGGAGCCATAAATGTCGTATAGGAGTTATATTACAAAGGCATGATAAACTTTGGCCTTTCAGAAAGAGTCAGGCAGTAAACGAAGATCAGCGAATGGTGTTATGTTGTATTGAGCTACTTTGAAAATCAGGGGGTGGCTTGGGCAGCAAAAATGCAGCCATTATGCCACTTACTAGGGCAGCTACGGCTGCCAACACAAAAGCAGGCATATTGCCCCCACCAAACAACTCATCCCATGGCCCACTTCCTACCGAAACCACAATCTGGCGAAACATAAAAGAAACACCTTAAGAACCTAAAAAGCTTTTCACATGATTTTCCACATTCCATGCCATCACACAAAAAACTTTCAGCCGCCAAAACTCCCACTTCTCAAATTAAGACAACATCGCGAGATTCTGCAGGGGAGGCACTAGCCACACTCGAGGGGCTGGCAGTCCTCGCCCCCTACCGCACCTACCTAGGTATGCAGTGCCTCCCCTGCAGAAATTGAATACTAATGGAGGGACCCTCTGCAATGTTCAAAACTTCTTGTGATGAATGTGGAATGCCTTTAATTCCCAACAAATACACAGACTGTAAAACACGGTGAGTTGTTTAGAAGCGTACCTGAGGAACGACCACTCCTAAATTGAGCACCCCCATAGAAAGCCCTTGGCCACCACCTGCAGTGTTTGTGATCATTGTAGTCACAGAGTATGGAACACTATACGTGACCGCGAGTGGGATCCCTAGAATTGCAAAGATGCAAATTGCCGACCCCAGGATACTCATCGGCAGATAGCCTGATGCTTGGTAAATCTGTTTAGCCATGATTGTGATAACAACGGTGCTAAAAAAACAAGCGGACATGATCACATTGGCTGCAGCCCATACCATCCTCTGCCCAACTTTACGACATAAAGGTTCAATAAGCAATGATGTGATACCGAGCACAACTGAATTCAGCATAAGCCCAAAAGATCCTGCACGCACACCAGAATTGTACAGCTTCTTCACGCTTCCATCTGCCGAGGAAGGGTCTCCAAGAAAAACTTCTCGGCCCATCCAATCAGTGTCAAAAAGAATGAATGGAAACCATGCAAACCAAGTCAGAGCTGTAATCAACAGGATGTGACGCATGGGCACAGGGAGGTCTTTGAGTGTGCCGAAGAGCTCCCAAAAGAAAGCCTCCTGCTCCACCTCGTTGACATCGTCATCCTCATCTTCTTCCCCACTATCTTGCAGCCCCACTTGCTTTCCTGTAACTTGAGTTGAAGACTCCTTGCACAACAAGAGAGGAACCGTTGCATTGCTGTTTTGCTTCTTATTACTGCCTGTCGACGAAGACCATGGTATCTCTGATGCTGCCGTTAAACTCAAGAATGCGGTCACAATCAATATGACAACAGCTACGAGGAAGGCCGACTTGAGATTGGCACAGCTCTTGCTGCATGCTGTTGTCAAGGTGAAGGGTAAGATTTTGTACCAGCTGCTATATGCACCAGCCGCATAGCCAAGCACATTCCCTACAGCCATGCATAGGGAGAAAAAAGCATTGGCCCGACGTGATCTGCGATGATCCTTACCTGTGAAGTCTGCAAGAAGCGCTCTGCATGGACCCTGCAGGGTGTTATTTGCCAGGTCAAGGACCCAAAAACCAACGACAAATACAAAGATTGCGCGAGGTCGAGATGTTGTGCTATCCCCAAATGCATAGCCAATATCAGCTGAGAAAGCAATGATGATAACAGCCAATACAATGAACATTGTGCCTGTGATTATGAAAGGGCGCCTTCGACCCCATGAGCTTTCGCAGTGGTCACTCAAGTGCCCAACAAGAGGCTGGATGAGCATGCCAGATATGGGCCCACAAAGCCAGATATAGCTTGCCCATGCATGGGGAATGCCAAGCTCTATGACATAAGGAGTGAGTAAAGAGAGCTGAAGCGCCCAACCGAATTGCACGCCGGTGGCAACCAATGAAACCCGAGCAAGAGCCCTCAGAGGTACTCTGTTCTTGCCCTTGTTACTTTTCAATCCTGTTACACTCACAGATACTTCTGTACGATCCATGGAAGAATCGAACCCGTCACAAATAAGATGGTATCAAGGAATTGCAATTTGCAGCTGGGGAAATTGAACAAAATTGTGGAGGTTTTGGTTTTAAAGGAGGAAAGATTCCTTCTTTACAGAAACTTGTTGCAGTTATTTACAGGGTGGCCGCAGGGCACCAACGACAGCGTACCTGAATTTTGATTTTAATTCCTTGAAAGATTATCTGTGGGTGAAAACCATAATGAGCTACAAACACACAGAGGCTTGATCCAATGAAATGGGTAACTTGGCCATAGGATTGCACCACAATTGCAGGAACCTAAAGACAGCAGAAGAAATGCGGGTAATACACCTGCTCTGAATTAGATGGATGCGCATGGACGATGAGGCATGCCGTGAACCTTAAACAAGCCCTATATGGTGAATAAACAGCAGTATGTGCCCTGCTTTCTCTGCGGATTAAACCCTAATCTTGGGCCTGCCGCGTCTTTCTAGGCCCCAGAAAACCCAAACCCCTAGACTTGCAAGGCGTCTTCTTCGGCGTCCTTCGCCCCCAGAGACAAGATGAGTCTGTGGATGATCGATGGCGTGCAGTGTGTCGTGCGCGTCCCTGATTAACAGAATCAATAATTGCCTCCCCTTAAGACATCTTTTTA |
| **SIGNAL RESPONSIVE 1 (SR1)**:  GATACTTTCAAGAATTGTAATGATTTGCAGCTGCTATGATTCAGCTGAGGAACTCCAACAATACAATAATTTTATCAAGCTCGTTGATTTTCATTTCAAATCCAAGAACAAAAAGCAGAAAACACATGCACTAAGCAATTGAAGTGGATTCGATATCAATGACAGCTCAGGTGGTAGTCCTCCAGCTTCATGGAAATGAAGTCTTGCCACTACAATAAAAACTGGCTACCGAAGGCCTAAAAGTGACTTTGAGCAGCGCGCACAGCGCAAAACTGATAGTGAAAGTGGCTAAAAACATGAGAAAATATACTTGCTGATTAGATGGTGCAAGCACATTTTCATAATATTTGGTTCACACCGACCCTCGGGTGATTTTTGACACCTTTTAATGAATCCAAAAATGCCATGTTTCTCTCCAACAAACCCATAATTTGCTGATTTGTAATAATGTCATCAAAACTCAAGAGTCCCATTAAAAACACCAACTTCTGCACATGCTCTAGTGCAAGACCTCACTTTTAATCAAGTTGCACTTCATTGAAGTTGAAAGTTAGTCTCACTCAAATTCTGTAAGAAGGCTTGAAAGCAATCAGACATTTATGCCTCCAAGACATTCGGACATGGATCCATCTGATAATTAATGATCAGAATCAATCATTACAAAACTTGGCAAAATTAGCTTGGTTATACTGCACTTTATACAAAGAGGAAAAGAGTTCCAAGAAACAAAGCTTCGCCCATAATATGAACTCTGCCCTTTTGGGCTCTTGCCTTCCCACTGCCCCTTATCTTGCGTGTGTTATCTAAATTGTTGTAATAAGAAGGGAAACAGCATAGCTGATGCCGAAATTCTAGCTTCCCTTTTCATGTAATTGGAGTATAATTTAGTGGTTCCTGTGAAACCCCAGTAAATCAAGCAGGCTATGAGAACTAGATAGCTTCATGGATTGCGTAACTCAAATAAGACTTGGGCTAGTGGAAAGAGTTCTAGCACACATGGAAGATTTTGCTAATATAACTAGAGGGAGGAAACTCATACAAGAGCTGGACCTCTACTATGATACATCAAATGCATCTACATGTATAAGACATCAAATTTAAGGGATGGTTAGTAAGACCTAAGGAGCTTGTATCACATCCTTGAGTAGTGTAAAGCCGAGCACTAGCGATATGTTGACATAGCGTAATCTTCAGAAAAAAATTGTTCTTTGTCCTCCGTGATAAACGAGGTATCATGTGTGTTACCTTCAAGATGGACCTTTGTCTTCTGATAGCCTTCAACCAGCCTGCGATACTGTTCTCGGGCTTCTGGAGATCTCACCATAGATTGTACTCTTGCAAGAGCTTTCTCCAAACCTACCTCGATCTGTTTTCTCCCAGCCTTCAAAAAGTCCTCATCCCCATCACTTCCACCCAGCTCATTTGCTGTCGAAGACGTAACTGATTCAAAACCACGCAAACCTCTGCCTTTTCTCCGCCACCTTAAAATTGCTTTCTCCACAATACTAACTGACCATATGATTTTCTTATACTGCTTTCGAACTTGATGTCCTCTAAAATGAGCCTGAATTTTAACAACATGCTGACGAAATAAAAGAAAGTTCCGACGCCCTTTCCATCCACGATACTTCTGCTGTATGCGAATAGCAGCAAAATGCGATAATTCATCGTCTTCATAGAGTAATCCCCCTCGGTTTTGCTTTTGGGCAGCAGCAATGTACAGAGCCTCCTCATTCGAAATCCCATATTCATCCTCCTCAAGCTGGTAAGACTCCTGCTTCTTCCGAAATGACTCCACACGAAATTCAGACTGGATGCGAGCTGCTGCTTGAGCAGCATTTCGCACAGCTGCAAGCGAGTCTTGCAGAGACAACTGCTCCTCAGAACCCCCCTCAATGGACTGCACAATACTCTTTTCTGAGAGAGATTCTACCGCATCAGCAGTAGCTGGAAAACTCTCACTTTGTTTAGACTTCAAAGTCAGTGATGAGAGATGACTTGTAAGAGAGGACTCTGCAAGATAACCTGCAATTCCTTTGTGCCGCTCAGCAGAGGCCAAATCAGCTGGAGTTTGGCCCGCCGGAAACACATTGGTAGGATCAGTTTTGGCCCCTGGAGCTGCACCACTGGCCATAAGAGCAACAACCATGGCCTCCCTGCCACAGTGGGCAGCCCAGTGAAGAGCAGTCCATCCACGCGAGTCCCGAAAATTAATATTCACTCCGGCAGCCAATGTTGGGGCGATGATCCAAGTATAACCAAGCGCAGCCCCCATGTGCAGAACTCCTAATCCATTATCATCCAAAATAGCCGCACCTCTACCTCCCTCAAAAATCTTGTGGAGCAGCCAAAACTGTAGCTTATCTTTCAGGAGCTTCTGAACAAACTCCTCTTTTAAAGTTGCTCCAAGACAGCCTGATTCAGTAAGCTGATCTTCCATCTCTTCCCACTCATCAAACAAACCCAAACAGTTCAATTCACTAGGAACACCTCTATTAAGTTTATCAGCTTGTAAGGTTTGAGATGTTGGTCCTGATACAATTGAGAGCATCCTTGCAAGACGAATCTGAAAAAGCATGTCTCTCTTGTTTAAGGGTGCCCCTTCGACTGTGTCAGCAGAAGAGAACTTGTACTCTGCATGATATTCAAATTCTTTGATTTCACTGCAAGCAATCTTATCACATCGGGTTACATAAAAAGGCACTTTGCCAGGTGGATGTGCAGGTGCATTGCATCTCAAAACCCCTGGTTGTAGAAGTTCTGCCGCAACCTCCAAATCCCCAAACATACAACTCCATTTAATTTCAGAAGGATCCTTTATCATGTCCCCAAACTTCCCACTCACAAGTACCTTGGTGTTAGTAGTTGAAACAGCACAGTTGGGTGAAAAATCAGTGATAGAAAAACAATTCTCGTGGGGGAGAGAAGGAATTGCTCCAATATCCAGTTGCATCTGCTGTGTCAGACCAGGGACTTCTTCTGCAAGTGCACTAGCCCAATATGTTGAGTCTGATAGCATCCCATCCCCTCCGATGTCTGTACCCATCCATCTTCCAAAACTTTCAAATTTTCTAAATGAATCTTGTTCATCCTGCTGAGTAGGAAAATCAGCTTGAAAGTCTCTGAATACATTTGAATAAGAATGCATTAAAGAAGCATCCTTGATGTCTGCACCGGGCATATCAAATCTACCAGAGTTAGGTTCTGAAATATAGGACTGCTCAGTGTCCTGATATGTCTGAGGACGAGGAAGTTGAGCCTGTTGGGGGTCATTCAGCAGATCATTATCAAACCCATTGAGAATATCACCCTGACCAGGACCATTATCAGCCAGCTGTGCCAAAACTGCACTCCAAGGAGTGTTCTGCTTGTCAGCCACCTGCACTGAGCCCAGTCCATCAGCAGCAAATGAATGGTATTTGTTTACTGGATTGGACAATGTATCAAGAAAGCCTTGTGAATTTGGCTGCCATGATGTTTCTGCAGCTGGAAATCTATTATCCGGTGCAGACTGGATAGCCCCCATCCCACCATTCCTGGCCATTTCAGAAGGATCCTTAAGCCATGTAGACGTATTGCTCGTTGTCACAGCCTTCTCCCTATATTGATCAGTTCCAATTGGTAACACCATGTTGGTAATTCCAGAGCTAATTCCAGAGCTTTCCTTGCTTCCCCAGCTTTTGAGCGCCTCACAGTATTCTAACAGATCAAATCCACCAGGTGGGGTTACAGCACCATTTTCCTGCTTTACAGGTAGCATTTGAGCTCCACCTGCCCCAATTGCCAAAGGATAGGCTGCTGCAGCAGAGCCATTTGTATTTTCATATAAAGATGGAAGACCTTTTTCTCCATAGCTGACACCATTTTGATTTCTTGCAGAATAAGGCATGGATCTTGGAAGGCCTCCAGCATTTGGGACAGCTACTCCTGCTCCCCGGTTTGTAGCATTACTGGCAATAGCGTCTAATTCTCTTACACGAGACTGATCCGTATCATCACTAGATTCAGGTTCTTCACCTTCAGGTGAATACGTTGGTCCACCATTCCAGTCTGCACTAGTATTAGGGCTTGAGGAACGAGGAGAAACAAGGGGTGATGTTTGAGGGGAAGAGCTTGCTACCCCACGAGAATTTCCAAATGAAGCAGTCCCATCAACTGAATAACTGTTTGGAGAACGCAAACCGCTTCTACTGCCCTCTTTAACTTCCCGATAATGTACCAGCACTATGTGCTCATTAGTATCTAGCATCCAATAGCTCCGTCGCTGGAAATTTTCGTTCTCTTCACCATGAGCATAATAACAATGTAGAACTTCAACACTTCCTGCCTTCAATCTTTCATGAGCCTCCCTGACGGTCTTTCCATCCTTCTTCTTACGCCAATTGTGACCATCTTTCCGAAAATACCTCAAAGCCTTGCGATCGAAAAGAAACAATGAACCACTTTGTGGCTTGTGAGGGGGATCTGGTGTGAGCTTGAACTTGCGGTAATTGCGAAGAATTTCACAGACTTCAGTGGGACGAAGCCATCGATGCTGTGCCTCTTGAAGTATTTGACACAAAGCAGCTTCTGGTTGATTTGGAAGCCCTCCATAGCGGCGATGGTCCATATCTTAGCTATAGGATGTACACATCAGAGCATTCCAGCTTCAAAACCCCTAAACGTCAGCAATTGGGTCGCAGAAGCTTTCCTTCAGAGGACCAAAAAACCACAATAAGGGGTTCTCGAAACAGCAAGAAGTGAAGGAAGAGGGAGGGGAGGGGGGCCGGG |
| **CERAMIDASE (ACER)**:  GGAATGTGCAGATAAAAAGTAATGCTTTGTGCAAGGGTGTAGAAGCTTTAAACTAGTCAAAAAATTCAGATATCCACTTGAAAAAACCCTTCTTATCACTCTTTCTCATGTACATTGCATAGCCAATGAATAAAACATTCAACAGAACTATTGCTGGAAGTCTGCTATCTACTCGTGTAGAGACGTGATATGCAGTCACATCTTGTGGAAACTGTCGATTTTACTTCTTGTAGGAAGGGGACACTTCTTTCAGCCACACGTGGAACACCCAGCTTACTCAAGGTTCACTAACATTTGCAGTGGCCCAGATCTAAGTTCAACAAACCAGTCCAATTTAATAGGTCGACGGTAAGGCAAAAAATGAAAGAGATCATGTAGTAATAAAGACATCTCTAAAACACAGCAAGCATCTAGATTTACGAACCTTTTTGCACGCCCTGTACAGGACCTGAATCAGAGATTATACAGCAAAGAGATTAAATTTAAGGCATAAGAAAAAAAAAAAAAACAAATCCCATCAAATTTGTCATAGGCCTAGGCCAAATACTAATACCAGCATGTACAATGACCTTTCATCACTGTTGTTTGGGTTTGACCACCTTCACGTAAGGCAATCCACAGAAATAATGTAGCTGGGGACTCCAGTTAAGTTGCTGGGCGCGGCAAAACTGCAGGTATGTGTTGGCAAAGAAGGCGTCGAGCCCAATGAAGAAATGCCACCATGCATGCCCATGAGGGTTAATCGCCCATGTCACTATTGTGTCGCAAAAAGCCCAATCCAACACCCAACAAGTGCATCCTAACACCATTGTGAGTATGTACATATGTGCCAGCCACTTGGCATGCCGATCTGTAGTGTGAATGTAGTATTTATACATTCTGGGCAAGCAAAGTAACCCCAAAAAAAAGTAATGAATTTGATAGCTTAAAATGAACCGAAGTTGCGAGTGGATGATAGCAAAGATGGAACCATAGATAAAAAGCACTGTAGGCATTGTGCTTCGATAATGCCAGTCTGGGGAGTAAAGCACATAGAAATACATCAGCATCAGCCACACCATTGGGGTTTCTTCACTCTGCTGATGAACATGCTGCAATGTGCCATGGAAGAACATACTCCCCAGACCAACCATCATTGTCGCAAGATTTAATGAACTGAACCTCTTTTCAAACCTTTGCCTCATTGAATTCACTAAAACTAAAAAAGCTAGAAGTATGCCAGGCCCATTCGAGATAGTATTGTAGAATTCTGCTACATATGCAGAAACAGTGTAGTGACTTTCACACGTTGTGCTTGAAGTAATAGGTCCCCAGTACCCATTGATGTCAGCTGAATCTGCCATTACTCCCCTTTGAAATATTAATAACAGACTCCAAATCTTTACTGCTCACATTTGACCATTTTTGTAGAGGTAGAACCTCCTTCACAATGTCGGTGCAGAGGCAGTAACCCTAAACCAAGACATGATGAAGACCCTGTAGGAAGCCGGTGGAAGGACTTTGAATCGAAATCGAAATTAGGGTTTTTTTTATTCGCGTCGACAAGCTTATGTCTGTGTACGCGCGCAAGTGCGTGCGTGCGTGTGTATGTGAAAGTGAGAGAGAGGGGGCTATGTGGCAC |
| **AMINOTRANSFERASE ALD1 (ALD1)**:  GAGAGAGAGAGAGAGAGAGTTCTCGTAGAAAATGGCCGAGCTGGTGCCGGAGAAGAAAATGGCCACTGGCTTTTTTTATTTTGCTGAAAAAAAGAAATATTGGTGGTGGTTTTTTTTTTTATGCGGCTCGCCTTAAAATTATATAAAAGTTAACTTAACTTACTGAAACACTTGAGATGCTTGTAATATGGCTGGACTTTATTATGATTAATGAGAAGATGTGACTTTTCAAAAAAATCTTATTTTGCATGCAGGCAAAGGAGTACTCATGGTGCTGTCATACAAAAAGCATGCAGGCAAAGGAGTACGGAATTGTAGTTGGAAAATTAAAAATCTCACTTTATTTTGCTGTTGGCTCGTTGAGCTTATCAGAAAGTCCAGCTGACACCAATCATTAACTGCATCAACGCCATGGAACGAGGTTTTACGACCGGCGTTCAGCGCAATGACAATCTAACACACTGTGAATCTAATTTGTTTTTTCAAACGGCTTACGTTCGGGGTTTGCTTTTAAGGGGTTCTAGATTCGTGTGGAGCTTGATGCATACCTTAAAGCCCATCCGAGTGCAAAGCTGATAAGTCTTTCTGTGGGAGATGCAACTGAACCCATTCCACAAATCGTCACATCTGCCATGGAGCAGTATGCACGTGGTTTGTCCACGCTTGAAGGTTTCTCTGGTTACGGTACGCATCAAGGGATAGAGTCCCTGCGAAATCGGATTGTGGAACTGCTCTACAAAGATCTTGGACTAAAGGCATCGGAGATTTTTGTTTCAGATGGAGCAAAAGGGTGCTTTGCACGTCTTCTGATGTTATTTGGATCTGATGTTACTGTGGCTGTTCAGGATCCATCTTATCCAGTTATTGCCCAGATCTGCAATCTATTTGGCCCATCAATTCAAGATAAAAGTCGAGTTTTTTATTGGAAGAGTGAAGCTGAGAATAACTTCTTCCCAGATCTATCGTCTGTACCACGCACAGATTTGATTTATTTGTGTTCTCCAAACAATCCAACAGGAATAGCAGCCACAAGGCAACAACTGGAAGAACTGGTTGCGTTTGCCAGAAAGAATGGGTCCATTATACTGCATGATTCTGTTTATTCTGCCTTTGTAAATGATGACTGTCCTAAATCGATCTATGAAATTCCTGGAGCAAAAGAGGTTGCTATAGAGGTTGGATCCTTTTCAAAGCTAGCAGGGTTCACTGGAGTGCGTTTAGGATGGGCTATTGTTCCTGAATCACTTACCTTTGCTAATGGGCAACCAGTTCTTAAGGACTACGGTAAAGTCGTGTTGCTAACAGCGCCAGCTGGTCCTTCAAACATTGTGCAAGCTGGTGGTCTTGCTTGTCTTACTCCGGAAGGTTTAAAGGTGAGTAACCTTGTAAGGACCTATATATAGATATGGTTGGGCGGTTAATCACATGGGTTCTTCCCTCTACTGCTTACAAACCTTATGAGCATCAACAACAAGAAGATATGCGATCCTACACTGTTCACGTTCCAAGGTAAAAAGGGTTGCTCGAAAGTGCTTTATGGCTTGTTTCTTTTGCAGGAATTGATGAAAAGAATTGAGCATTATAGGGAGAATGCAAAGATTCTTTTGGAGGCATTTGCTTCCTTTGGACTTACAGCATCAGGAGGTAGAAACTCACCATATATTTGGGTTGAGTTTCCAGGGCGGAGCTCTGATGATGCTTTTAAGGAATGGTTAGAGATTGCCAATGTCATGACTTGTCCAGGGGTCTTGTTTGGACCTTCAGGGGAAGGCTACCTCAGGGTCAGTGCTTTTGGACATAGGGAGAACATCCTCGAGGCAGTAGAACGACTGAAATTAATTTATTCTTCATGAGCAAACACAAAAAGAAAAGATGTTAACATTCATTATTTTACGAAGAGGGCCTTCTGAGCACTAAAGTGCTCTTTTCACATCCTCTTGTTGTTATGAACATGTGAGAGAGAAGACTATCCTTATGTGAGAGCCTCACATTATCACTCCCATTGTGAGGGGCAAGTTTTTTGTGCAATTCTTTAACC |
| **β-GLUCOSIDASE 42 (BGLU42)**:  GGGCAGCTGTTTTGTGCGTGCGTTGTAGGAATAGATCTGTGTGTGCGCGCGCGTGTTATTTTGTGCGTGTGTGTGTGTGATTTGTGCGTGCGCGCGAACTTGTGCTCGTGGGTTTTGGGTGTGTGCGCGCCGCTTGTGTGTGTTTTTCATGGCGCCTCCCTTTGGGTCGTACCAGGAAGATGAGGTATACGAGGTCTACGAAAGCCCTGCTGCTGTTGCGCCTCTCCTCTCCAGATCCCACTTCCCCCACTCCTTCATCTTTGGAACCTCCACTTCTGCTTATCAGGTTGAAGGTGCCACAAATGAGGGCGGCCGAGGCTGTAGCATTTGGGATACATTCACTCAATTACCAAATAAGATTGCAGATGGAACGACTGGAGATATTGCAACAGATCAATACCATCTGTATGAGGAGGATGCTACATTAATGCAACAATTGGGCTTCGATTCATATCGATTTTCCATCTCTTGGCCAAGAATTTTTCCAGATGGAAGAAAAACCTCATTAAACAAAGAGGGCATTGCATATTACAACAGATTGATCGATGCTTTGTTAAGGAAAGGAATCAAGCCTTTTGTAACCTTGTATCATTGGGATCTCCCACAAGCACTTCAGGACACAATTGGAGGGTGGCTTCACCCTGAGATAGTAGAACATTTTTCAGATTTTGCAGAGACATGTTTTAATGAGTTTGGGGATCGTGTGAAGCACTGGAATACTCTCAATGAACCGCTAAGGTTTGCTTTCTTCGGGCATGGTATAGGTATACATGCGCCCGGAAGAACTTCAAATAGAGCAAGGTCTGCTGAGGGAGATTCGTCCATGGAACCCTACCTAGTTGGGCATCATGCTTTGCTAGCTCATGCTTCAGCTGTCCACATTTACAACCAAAAATTCAAGGCGCAGCAAGGTGGGGTGATTGGCATTGCTGTTGACTCAGAGTGGGGGGAACCTCTTACAAACACGAAGGCAGACATAGAGGCAGCACAAAGGCACCTTGAATACCACCTTGGATGGTTTTTGGATCCTATTTTCTTTGGAGACTATCCTTCTTCAATGAGAGAAACAGCTGGTGATAGGCTGCCAACATTTACTCTTGATGAGCAAGCCCTCTTGAAAAACTCTGTAGACTTTGTTGGAATCAATCATTACACCACAAGATATGTAAGCCCAGCGGACCCAGATGCAAAGCCGACCAATGGTGGCTGGTTTGATGATATCAAAACAAAGAGAATAGCCGAAGTGGATGGAATACCAATTGGAGATAAGGGTGCATCTCAATGGATGTACATTGTGCCATGGGGATTTAGAAATCTCGTGAATTGGGTGACTAAGAGATACAACAGGCCTCCAATCTACATTACCGAGAATGGTATGGATGATGAAAATTGCCCTTCGAAATCGATTGAGGATTTTTTGCACGACACAAAGAGGGTGCATTACCATCAAGATTACTTAGCAGCACTTGCCCAATCAATAAGGGAGGGTGCCGATGTCCGTGGCTATTTTGCATGGTCTTTGATGGACAATCTTGAATGGGAGTCTGGATTCTCGAAGAGATTCGGGCTGATCTTTGTGGATTACAGCAATCTCAAAAGGTATCCAAAGGATTCCGCCCATTGGTTCAGCTCATTTCTAAAACACAAGCCATCTGGGAAGCAGACTCACCTTTATGACTTCATGATAAACCATGCACATATGAAACTTGCAAGCCCACAAGATATGGACCGCATAACAGTCATCAGTTAAAAAGCATGGTTTTTTTGGAATGAAGTGGATACACAAGATATGAAGAGCTAAGCTTCGAATTGGTGCCAGCTAGAGAGTAGACAATTGATGTGTGGGGATTGCTAAATGCCATCAGAATTGGGGGGAAATATCTCTACAGTTCTTTTCTCCACTTGCTATAGTTTATTTACCATTGTGATGGGTGAAAATTCACTTATTAATCAGCATTAACTATCTTGATTAATATTGTATATGCTGCACAAATTTGTAAAATGTGCGCGATCGATGGGAATCTTAATGCGAGAAAATTGGACGTCCGGGGGCATTACAGCGGAAAGCAAAGGAAGAGGATGGGAAGAACCATCAGTCCAGGGTAAAGCTCTTGCCCCCCACTCTGCAAGCAAAGAGGGGTTGACTTCAAAGTGCTGTTTATACATTAATGATACCTATGCAAAAAAAACTTGCATCCCACCTACACTTAAATTATCCCAATCAACAATGGCCCCTCTTGTAAATTAAATTACAAAATTTGTAATCAAGAATAATTATAGTTCTATGTAAATCTCTGTGTGTGTCTCCCTCTGCGCGCACACATGCCTCACACACACACACAATTTCACAAAAATATACCTTGTATAAATGAGATTTATTATAATCCACAGCCCCACAAGCCCTTTTTTTTTTGTGAAAATGAAAAATTTAAACAAAATAAATTTAA |
| **L-TYPE LECTIN RECEPTOR KINASE S.4 (LECRK-S.4):**  TTTAACTTTGAGTACCCTTGATTACATTGTTAGCAAATCCCTATTCCCAAAAACCATATGAGCAAAATGTGATATACCACAAAAAACACTTTGGGTATGTCTAGAAATATCAGATTGATCATAAAATCTAAAGGAACACAATCACACATGTTTCCAAGAAGCCACATCCATGTAAACACTAAGAGAAAAGATGAGCATAGCTGCTAAAAGAGACCTCATTAGGAATTTGGCATGCTAAAGTTCATGAAGAATATATTAAGGCAACTTCTTTGCCTTTGCGCTATAAAACTGCTAGACTCATAATTAATGTATGTGGCAAGTCTTAGCATTACATGCAGTTGCAAGTCATATGTTGCATCCTTTTTTTTTTTTCTTTTACCAATTGCGAAAGTAAACCCTCTCATACCCCCACAACACAAACCCTCTCAGATCCATAAACTAATGCTGAGAACACACTCAAGGGGGGGCAAGGATAGGCCATGAAACACTCATGGATGGACATGCCAAATAGGAGTCCGTGATGCACACAACCTTGTTAAGGTAGCTGAGAGCTACAAGGCAAGTTTTCTAAATATAATTATTTGTCTTATGGGGTTTGAACTGAAAACCTCATACTTATAAGCTTCTACCTTGGGCCTGAAAGATCATCGTAGTCTATTGTTGATGAAGAAGCATCATAAGCACTTGAAAGTGGCTTAGATGTGAATACTCCACTTCTATACACCCTATTGGTTTCAACCTGCACATATATGGCCACGGGCCTAGACATGGGCAACTCCGGCAGCTCTGTTTCTCCCCTCAATATCTGCAACACTTGCTGCGTCGGAAGCCTCGACTTGGGATCTGGGTGTGTGCATAAAAGCCCTATGTGCAACATGCATCTCATCTCATCCACATCAAACTCACCTTGCATTTGCCGATCAGCTACATCCATCAGCTCCCCCTCCTCATGCTTCCTCCACACGAAGTCCAAAAGCGGCTCATCAGTGTTTGAAAAAGGGTGTCGCCCGCATGCTACTTCTAATGCCAGAACTCCAAAGCTGAAAATGTCTGACTCCGGGGTAACTCTGCCGGACATGGCATATTCGGGTGCCATGTAACCGAATGTGCCCGCTACTCCGGTTTCCGAAGCTTGCGTGCAATATTGATCATGATCGAAAAATCTAGCAAGACCGAAATCACCAAGCCTTGCATTTAGATCAGCATCCAGCAGCACATTGCTAGCTTTAATGTCTCTATGTACAATCATCTTCTCCCAATCCAAATGTAGATAAACCAGAGCAGAAGCTACTCCTTTGACAATATTGAACCTCAAAGGCCAGCTCAAAAAATGAGGGCTACTTGAATACAAGAGCTTTTCCAAGCTCCCATTTGGCATGAATTGGTACACAAGCAAGAGCTGTCCTCTGTCACTACACCAACCCAACAAATGCACAAGATTCCTATGCCTTAGCTTCCCTATTGTCATGACCTCTGATTTGAACTCTTTCTCCCCTTGTTTTGACGCCTTGACAATCCTCTTCACTGCTACATGCTCCACCCCTGCGTTCTTAGTCGTGATCACACCTTTGTATACGTCCCCCGAACCCCCATGACCGAGCATCTCCTTGAAGTCTCCGGTTGCCATTTGGAGTTCTCTGTATGTGAATTTTTGAGGAGCGGTCACTAGGTCGACATCAAGGCGAAGACCTGTAGACATCCTTCGTTTCCATCCAATCAAGAGAATCACCAGAAGAACTATACCAGAACCTATGCTTATACAAGCTATAATCAGGTTCCTTTTCCTGTTGGATGATGGTGGTGAAGGCGAGGATAAGGGTGATAACGATGGTGTTGGCACCGGAGGAATGGGAACCGACACAAGTTGGCTTGAAAAATTCCAATCATGAATTGCATTCCTCTCTTGGAAAACCCCTGTACCTGCTGTGAAGCCAACATAGCAGCTACTATTTACATAATCCCAAATGCTTAATTTGGAGTAATTCAGAACTTTTGTTGCGGATGCCTTTTCTGCTGGTGCCACGGCAAGATACACATCCAGTAGCTGTTGTGCAGCATCATAGTCTATCCATGTGGTGAGGCGGCGGCTAAAATTGGTGGTTTTCAAGACCAATTCTGAAGGCAAGCTTCTAGCTAAAGTGGAAGTGAGGCCATTGATATCCAAGCCAACATGATGGTCATCGGGGTCACCATAGTCGGGGTTCAGGAAAGTATCGTATTCGACAGCAACAATGTGAACGAGGGATGCATTAGAGCCCTTGTATAGGTCCACATCGAAGAGGCCCAAGGCGCCTGCGGTGGCAGATCGGGTATGTGGGAGGAGGTTATTGGGCGCTAGTAAGAAGGTGAAGCCATCACCGGAGATGTCGGTCTGATTGGTAGCAATGGAGAAGGTAAAGGACGTCGAAAATGAGGCGGCGAGGCCTTGTGAAAGGTTGTGCATGAGGACAGGGGAGCTGTGCAGGACTCTTGAAATGAAATAAGGGCCAGTAGCTCCAGTACTCTTATTGTAGGTCATGTATAGCGTTCCCTCGTCGCTGACGACCGCTTCTCCGAGGATGAGGAGATCATTGGCAGAGGAGAAATTATTGAATGTAAAGCTCACATTTTGGGAGTAAAGGGGCTTAGCAAGGGCTAGAGTAAGCAACAGGAATAATGCTTGCATCTCTCTCTTATTGGGTAATGCTTGCATCTCTCTCTCTCTAGTCTCTCAGGTTGCTTGCATTCAGCTTGTTTATCTTTGGTGTACATCAGTGTGTTTGTGTGTGAGAGAGAG |
| **GUANINE NUCLEOTIDE-BINDING PROTEIN SUBUNIT β (AGB1):**  AGAGAGAGAGAGAGAGAGAGCTCTTTCAGCAAAATGTGTTGTTTGAATCTACAAGCAGGCAATGGTACCTGCATGGAAGCCATCAATTCAGGGGGCCTTGCAAAGCAAGCCTCTGTGTATTCGTTGAAGAGATAATTGCAAGGGTTTTCTTCTTTGTGCGCATGCGCCACTGGATATGGGGAGCAAGATTGGGAGTGTCTACGAGTGGCATTAACAACACTGATCCAGATTGCAGGCACGCGTCTGTAGAGAGTGCGCATGTGCGTCCACAGAGGAAAAGCAGGAACAGGATCAATCTCGCACACATGCTGTATAGGAAACACGAGAACAGCATTGAGGTTGTGCAAATATGCGGCACTAGAGGAACAGAGGAGGAGGATTGAAAATGACCTTCTGATTTGGCTTGAACATCTTTTCTTTGCGCTTGCAAAGCTTCTTCACTTGCAAACACTTGGATACCTTCAAGCAAAAGCAAAGGTTTTTGAAGTCACGCGCTCGAAATGACGTCTATGGCAGAGCTGAGAGAAGAGCTCAAGCAGGCAACTGAACAGGTCAACCTTCGGAGAGAAACAGTGCTACAGAAGCGCATGCGGCTTCTTGATACTAATGTTGCAGCATATGCTCGGCAGAATGGACATACAAACACCATTCGCCTGCGTCATCAGGATTTTGGCTGCTGTAGAACCCTTCAAGGACATTTAGGCAAAATTTACTCATTGGATTGGGCACAAACGATGGATCAAATTGTGAGTGCATCACAGGATGGCTATCTTATTGTTTGGAATGCTTTGACGAGCCAAAAGATACATGCAATCAAACTAGCTTGCTCTTGGATAATGACATGTGCATTTTCGCCCAGTGGACAGGCAGTGGCTTGTGGGGGGCTTGACAATGTGTGCACCGTCTATCCGTTGAGCTCTCAACAAGGGTCTGCTCGTCCCGAACCCAAGGTGCTAAGCGGGCATAAAGGGTACATTTCCTGCTGCAAATTCATACCCGATAAAGGCACCCAAATTCTAACAAGCTCTGGGGATCGAACTTGCGCTTTGTGGGACTTAGAAGGCTTCCAGAAAATCTCTGTATTTGGTGGGGATACATCATCAGGTCATAATGCAGATGTAATGAGTTTATCTATCAGCTCAGCAAATACGCAGCAATTCGTGTCGGGATCGTGTGACAAGACAGCACGATTATGGGACATGCGTAGCCCAGGCAGAGCAGCCCAATCTTATCAAGGTCATGAAGGGGATGTTAATACGGTGCAGTATTTTCGTGATGGTCTGAGATTTGGGACAGGATCTGATGACAGTACTTGCAGAATTTTTGACACTCGAACCGGACATCAGCTACAGCAGTATAAACATCCCGATCAAAGTGTTAAAGCTAACTCGATAGCCTTTTCACATTCAGGGCGCCTTCTTTTTGCATCATATTCAAATGGAGATTGCTGTGCATGGGACACTCTAACTGCCCAGGAGGTGGTTAATTTAAAAAGCCTACCAGGTGCACACACGGAACTTGTAAGCTGCCTAGGTTTAGTTCCTGATGGAAGCGCTCTGTGCACAGGAAGCTGGGACCGAAATTTGAAGATTTGGGCCCATGATGGGATAAACCAACACATTTCTTGACTCGTGGTCTTTGCAGTCAACATAAGCTATGCCTGTATTCTTTGTTAGCAAGTCCCTTGCTTGTCTCGTTGCCTCAGCATTACTTTCTAATGTCAACAGGAAAGACAGACTGTAAGAAAGATCCTAGAGTTCACCAATCTTGCTTCTAGTGGAGCTTAGTTTAATAAGCCATGAAATTACTCCCTGAAAGATGTGCGCATACGTACAAGGGTGCTAACCTTTGGAGTTTTCTCAAAGCTTGTCGATCTTGTATTGAAGAATTGGATTTAGGCTTATCAAGAGTTGTACCTCGTATGAACGGATGTAATGATTCTTGATTGTTTTACGATTCTCACGTTAGCTAATCACATGTCATCAGCTTTCATTCATAAAATCTCTGATACATGGAACTTATTTCTGTTTGAGGTATGAAGAGTACCAAACACGGCTGATTCATGTACCGTATTCAAAACTTTTTACTCGCGTGGTTTTCATCATGTCATCAACTTTGGAAATTCAAGCGATTTATTTGAGATTTCAGTCTA |
| **HISTONE MONO-UBIQUITINATION 1 (HUB1)**:  CAAAGTGTAGCAGCGACCTTTTTTTGGCTCGAACCCTCGTTCTCAGCCTAGTAGCGTTTTTCCTGTATTGTGTGCGCGCGCGCGAGCGAGCGAGCTGCTGCGGAGATAGAGAGAACGTGCGCTAACCCTAACTCTGTGTTTACCCTCCTCCTCCCTCCTTCCCCTCTCTCGTGAGCAGCGAACTGGAGTCTGTGGGCAAGTATCATGCCCCTTTACCGCACCGGGGCAGCAGCATCATGGGAAGCACAGAAGAGCCCGAGCGCAAGCGACGCCATCTCAACCATAGCTCCATCTCTCCTGCTCTTAAGAAGCAGGCTACCTTACCTTCTGCAGACGAGAAAAAGGTGGATGCAGCAATGCTGCAATACCAAAATCAGAAGTTGGAGCAGCAGCTTGATGTTCATAAAAGTGAAATCAGTGCACTAGAGAGCAAATGCAGTCAGCTCAAGAACAAACAAGCTTCTCATGAAAGTTCTTTGCAGTCAGTTCGGAATGCATGGGGCATGTTGTTGGAAAAGGTTGAGCATCTTGCAGTCCGAGCTGCCCATTCAAGTAGAGGAGAAGCATCAGATCACTGCATCTTGTCAAAAGATGCTACTAGTACCCGTGCTCCAGCAGAGGAAGCTTTCCTTGAAAGGTTACTTGAGACTGGTGCAACTGAGAGCAGCAATGAGAGCAATGACACTGCTTCTGCCGAGCTAACTTTGAAATCGTGCAAAGTGGCCACACTGAAAAGTGTAGAGCATCTCGTTCGTGCGATTGATTCCCAGAGAGCCCGCAGAGAGGAACTTTTTCTGGTGCTCAAGGGCAAGCTGCGAAATGATGATAGACTGCCAGTGCAACAGATTGATGAAAGTATAAGTGAAGTTGTTGCATTGAGGTCTGCTATGGATACTATACATTTGAAGCACAAGGATCTAGCATCACAAGTTCGCTTGTGGTGGAAGAACACAGCACGGGATCAAGCCGAAATAAAGCTTTTAACTGGCGAACTGGAAGAAACGATCATGGACCTGGACAGCACTAGGCAGAAGATTGCAGCTTTAAGAAATGAAAAGGATACAACTTCAGGAAAGCCTCTTCCAGTAGTGGGGGTCAAATGTGAGGCTAGTGAAAAAATGGAAGAGAAGCCTTTCCAGGATACTAAGGCCTTGGAAGGTGCATTGGAAGAGGCCAAAAGTTTAGCTTCGTTGAGGTTGAAAGAGCTAGAGGAGGTACAAAGAGAGAAAAGTCGTCTGGCTGAACAGCTCCAGAAAGTGCAGGAGGCACTAAATGGTGATAGGCATATAACAATGTCGCACCTGTATATTATGTTGAACGAGCAAGTCGAGGGCCTGAAAAAAGAATTGGAACAGTATAAGTCTCTTATGGCTAATTCAATGATAGAACAAGATAGCGTTTCAAGGGCTAATGGTGACACAGATGTAAAAGCTGAGGCCAGTGAAGCTGGGGAGGATGGAAACACAGTGTGTGAACAGAAGCTGTTGGAGTTGCAGTCAAAGTTGCTGGATAGCATATCGAAGAGGAACAACCTGAATATCAGAATGGATGAAACATCTCATGCCTTGGAGCGACAAGATGAAGTCGCGGAGTTTAAAGTCATGGTATCAACCTTAGAGAAGGAGATGGGCATGATGCAGCAACAGCTGGACAAATACAAAGAAGCTGCCTGTGGAGCTGAGTTGCTTAGGGCTGAAGTGGAGTCAACAAGCTTGTCTTTGGAAAGCAAGACAAGCGAATGCAAGTTCTACTCTGATACAATTGCAGACCAGCTTCTGGAAGTCAAGTCTCTTCGAGATGAGGCAAGGCTACTGCGTGAAAGTGAACAGGAGCTCAAGCTTATTCTTGACATGTATGGTAGCGAATCAACAGATTCTAGGGACTTAATGGAATTGAAAGAAGCAGAATGTTGTGCATGGGCTGAAGTGGAAAAGCTGAAAGCCGCTCTGGATGATCATGGTCTTGAGCTAAGAGTGAGAGTTGCAAATGAAGCAGAGACAGCTTGCCAACAACGGCTTGCAACAGCAGAAGCAGAAATTTCTGATTTTAGGCAAAGATTGGATGCATCTGAAAGGGTTGTGATGGAGTTAAAAGAGGCTGCAAATATGAAGAGCGAGGAGCGTGATGCTTACCTTGCAGAAATTGAGACGATTGGACAAGCTTATGAAGATATGCAAACACAGAACCAACGGCTTTTGCAGCAGATTTCTAAGCGAGATGATTATAACATAAAGCTTGTTTCTGAGAGTGTTAAATCAAAGCAACTTTACGCCACATTGAGCGAAGAGAAGCATGCCCTTCTAGAGTATATACAGCATGCGTCTAATTTTGGAGAAAGCCACAAACAAAGAGTGGCGAGGTTGGAACAGCAGGTTAAGTTGCATCTGGATCAGCTTAATAAGACTACAGAAGATGGAAGGCAAAATGCCAGCGCATTGGAGGTCTTGAAAAGAAGGCTAGCTGATGCTGATAAAGAGTGTCTTTCGACTAAAGTCTCTCTGGAAGCTGTTCAGAAAGAGATTGAACAACGCAAGGGTAAGACTGGAGATATACAGGCACAGCTGGAGAAGGAAAGGGTGGCAAAGAAAAAAGTTCAGGAAGATCTAGCATTATTAAAGTCAAAATTGGCACGCACTACTCCACAAAATGACGGGAGCTCCCTGATAGAGAAGCTTCAGGATGAAGTCAAAGAGTATAAAGCAATTTTGAAGTGTAGTGTATGTCATGACCGCCCCAAAGAAGTGGTCATTACAAAGTGCTATCACTTATTTTGCAACCCATGCATTCAGAGAAATCTGGAAATCCGACATCGTAAATGTCCAGGTTGTGGCATCACTTTTGGACAGAGCGATGTGCGAGCAGTTTACATCTAAGTGGGGCATTTGATTGAAGCTTGGATGCATCAAATTTCATGGGTTTTGCCACCCATTAAACTCTAGAGTCCAAAGAGACTTTTGGGTAGGAGTTTACCGTGCAAGATATCCTCGAACATTTGTCATGGCATGGTAGTGGCTCCATTTGGCATGGCACGGTAGCGTCCCACGCAGCTTTGTCCTGCTTTGGAGATCAGCGGGACTTGTATATTAATGATGGATCAAGGTTTTGGCTCCACTTTTGGGGAAGTCTCCTTGTAGCTATTAGGTGCACATTGAGTGTAGAAGCAGGAAATTTTGCTGGTGCGATACAATTCTCTCAGGTGATTACTCAAAGATGCGGCTCCACGATCATTGCCCAGCATGCAGCCGCGTGCATGTTTCTGCCTGAGCTGCTTGCTGTACAAAATTTTTCTGAGTGTTGAAAGGCACTTTAGTACCTTTTACAGGTGTATCACTCCAGTGAGCCTTCTTCAAATCAATTTAAAGTTGATTCATTTACGAAAGCCATCCCTTTGGCCCATTTCCAGCATGCAGCTCCACACGGGTGTGTATGTGCGTGTGTGCTTGCTTTTGTGTTCTTGTGTGACAAGCTGTTGTACATAATTGTTGTGGAGTGTAACAATCGATATTGTCTAACAGGCCTTAAGAAAAACTGCTCACAGCTCTCTGATTCTTCAGGGTTTACCACTAGAAGAGGCAGTTTTTTGTGTAAAACTGATGTGGGTATCAATCTTATACTGAAAAGGGAAATGAATAGAATATTCTGGCAAAAAAA |
| **INTEGRIN-LINKED KINASE1 (ILK1)**:  GGACTCGGGAGCTTTCATTTTCTGTCTCTGGAACCTGCAACAGCCCACCCACCCTCCATTTTTGAGGCGGCCTATGGTGGTCTTCGTCTTCTTCTCCTGGCGCCTCCTCCCGCTGCATCCTCTCCTGAGCTCGTGAACTCCATCGCCCTTCTGCATTTCCTGGCTCGCATTCTCCATCGCAGGCTTGGATACTGCATTTTGAGAATTCCTGGTTTCAAGAAGGCCAGTAAATCAGCACAGTGTCCATCCTTCAGAAATAAGAACCTCCATGGATTCAGCTAAGCAGAGATTCACTCTGGGAAGGCAGTCTTCTTTGGCGCCTCCCAACAAAGATGGTGACACAGATTCATCAAGCACAGTTTCACTCCCAGAGACATTGGACTTGGCCATGCAGCTACTGTTTCTTGCCAGCAAAGGGGATGAGGATGGCATTAGGGCTCTACTTTCCCAAGGTGTTGATGTGAATATTGCTGACTTTGATGATCGCACGGCTTTGCATGTGGCTGCCTGCGAAGGCCATGCCAAGGTTGTCAATCTGTTGCTGAAAAAAGGAGCAAATGGTAATGCACGAGATCGATGGGGCAGCACTCCACTTTCAGATGCGAAACATTATGGCAACAAGGAGGTGTGCGAACTCTTGGAAAAGGCTGGTGCTAAACTTCCAGAAAGTTCTAAGAAGGCTCCGATGAAAGTTGCAGATCCAGCTGATGTGCCAGAATATGAAGTCCGTCCAGAAGCTTTAACACACGTGAGGAGGGACCTGAAGATGCCTGAGTATATGGTTGCTACCTGGCATGGAATAGATGTTTCTGTGAAGGAGATTCCAAGGGAGTTATCAACTCAGCCCCAAATTGTTGCTGTTTTCCGAGAGGAGTTGGCTTTGTTGCAAAAGCTGCGGCATCCAAACATCGTGCAATTTCTAGGGGCCGTAACTCAAAGCACTCCAATGCGTATCATTTTGGAGTACTGTGAAGGGGGGGATTTGCATAGCTACTTGCAGAGGAAGAAACGACTTGAGCTTGGCAAAGCAGTGAGATATGCTCTTGACATAGCAAGGGGTTTGAATTACCTACACGAGTGGAAGCCTGAATCCATTGTGCATCGTGAATTGAAACCAAGTAAATTGTCAGGAGCATTCTACGAGATAGAGTTGGACGTTTGAAGGTTGCTAACTTTCACTTGAATCAGATTCTGCATGGAGCCTCTGAAGCTCGTTCAGATGCCAGTTTATGTGGTCCCTCTCGTTACATTGCTCCAGAAGTATTGCGAGGAGTTGCCTTCGACAAAAGTGTGGATGTGTATTCATTTTCCATGATCTTGTACCAGATGATTGAGGGCTCTGCTCCATTTGCGGACAAGAGTGAAGATCAAGTGCTTCTTGTTGTTACTCAGAAGAAAAATGAGAGGCCACCTTTCAAACTCAAGGCTAAGCACTACCCAGAAGGATTAAAAGAGTTGATCCAGGCTTGTTGGCATGAGAATCCGTCACAAAGACCAACGTTTGGAGTTATCATTGATGCCTTGGAAACATTGAAGCCTTTGTGCGACAAGAAGAGCTTTTGGAAGCGCATTTTTAAATCACCTAAAAGATCTCTCAGTATAAGGTCTCTGAGCCTTCAGTAAGTTTTGCTGCTGGTTGGTGTATAATAAGGCTGATGGCACCTACAGGAAGTGGGAAGAATGGTTCTAGTTTGGGATTTACTGTAGAACACACAAAACGCAACAAAGATTTTGCGCATGGCTATACATTCAACCTGTCATCATCAAGGGTTGATTAGGACACTTGCTGCCTCATTTTTGGAAAAACCACACATTCCCTATACCGTCATTTTTAGCTTAGTCTGAGTCGAAAACTGAGCTCAATCAATGTAAAGGTTTTACTGCTTCAATACTTTCAAGGTCGACATTCAGGTTCTGAGATATTGCAAAGCTAGTCTAGTACATTTCTTGTCTTATTCTATGCATAACAGAAGCAGTGGTTTGTGCTAGGTGGATA |
| **FLAGELLIN-SENSITIVE 2 (FLS2):**  GAAAAAATGTCAAAAAATCAAATTGAACTATATTATGGGAGTGATACATTAATATACTTTGTGGCCGCGAAGCGGCCACTAAAAAGAGTGGACCAGGCTGACCGGTAGGCCGGCCCCGGCCTCGGCCACTCGTGAATTTATAACGAAAGGCTTGTTATGGTCGATGTTAAAGAGAAATGCACGCACTTCTTGCATTGTGGGGCGGTCATTGGGGTGGTCTTGTGTACATGCCACACCCATTCTTAGGAGCTGCACTGCCTGCATGCGGGCATTATCAACATTAATGACACTCGATGATGATGATGATGTCTCACAATCTGAGATGGAGGCGTTGAGCAACTCCTCATAATTTAAATCTACCCCATAGTTGGGGAGCTTGGCTTTGACCCATTCATGGAGGCTTGTTGATCCAGGCAGTTGTGTAGGCTTTCTCCCCGTCACCATCTCTAGGACCACCACTCCAAAGCTGTAGACATCCACCTTAGTTGTGATTCGTGACTCATATGCATACTCTAGCAGCCAAAACCAGCATTAAACGACTAAAATTAAGAATGTGATGTCTATATATCATTACTAATTAGAATGTATTTACATATTTCTTCAGCAAACTCAACGAAATCATTGAGTTTCGAGGGGTCAGCTCCCCTCAGCTTTATCTCCCACGGGATGGCATGCATGGGATCAAGGGACCTTATGAAAAGGCGGCCTCCACGCCTTATTGGGGCCGTTGATCTCAAAATTAATCTCGGGATAAAAAATTAATCTTAGGATCCTGAGATTAAATTCCATTCCGAGATTAATTATAGGGGAAAACAATGTCCGGACTCCAAAACTTGTGGTGATATTATCGCATTTGAGCTATCAAAAGACAGACTTTAGTACCTACCTGGTGCCATGTACCCAATTGATCCCTTGAAGTTGGAAGTTAAAGAGACAGCTCCCTCTTTAACAAGCTTTGCGAGCCCAAAATCTGCAAGATGTGCCTCGAGAGCAGAGTCTAGAAGAATGTTGTTGGGCTTGACATCCCCATGAATAATGGGTACACCATACTCGTGATGCAAGTAGGTCAAAGCATTGGCAACACCCAGTGCTATATTTGTGAGACTCATGAACCCATAAGATTGATGCCCATCATGATGATGCAGATATTGCTCCAGGTTCCCATTGGGTACATATTCTAGCACCAAGGCATTCACCTCTAGGTTGAGGACACACCCCAAGATTTGAACAAGATTTCTGTGCCTTAGTTTGCCAAGTATCTGCACCTCTTGTAGCAATGCTTCACGGAAACAGACCTCCTTGAGCTTTTTCACAGCAACAACCTTGCCATTTGACAACACTCCCTTGTACACAGAGGCGAGCGCACCTTGTCCGACAAGGTTGGCCTCCGAATACCCTTGGGTGGCATTTATAAGCTCCTCCGCTGTGTATCGTTTTGTTTCTGCCAACAACTTGATCTCTTTGGGCACCACTTGAAGACATGATTGACTCCATTTTGAGCAATAACACAATGCCAATAGTATCAAAGACCCGGCTATGGCTGACGAGGTTAAGACAATACCGAGAGTTGCTTTCCAGCTGATCTGACCACCATGGTGATGTTTCTTCGAGGAATATTCATGAATGCATATCCTGTGAATGACAGGGCCGCAAAGCCCAGGATTTCCTAGAAAGGAGCTTGCATTAAGGTGCTTGAAGACCCCAATAAGAGGGATGGTGCCAGTGAAGTTGTTGAAGGAGACATTGAGAAATTGTAGGCGATGTAATTGACTCCCCAGGACTGATGCAGGTAGCACCCCTGTAAGGTTATTGCTAGAAACATCGAGCTTTTCGAGGTTGACTAGCTTGCCTAAGTGCTCTGGGAGCCCTCCAGAGAGGTGGTTGTGAGACAAGATGAGAGCAGTAAGCCCTACACAATCACCAAGGCTGTCTGGTATGGTGCCAACAAAGTGATTGTGGGACAAATTCAAACTCTCCACCTGTACTAGCTGCTTTCCTAACCAAGAGGGTAAAGCCCCAAAGAATTCATTGTGGGACAAGTCCAGATCTTTTACCGTGCGCAGCGCTTGAGCAAGACTTGATGGCAAGGAGCCATTTAGTCGATTGAAAGACAAGTCTACTTCAAGCAAGCTAAGGGATTCAGAAGACTCAAGCTCCGGAATACTGCCCTGAAGCAGGTTGCCGTGCAGATATAGCACTTGCAACATTTGGAGCATTGTAAGACTGCTTGGGATTCCACCAGTTAGGCGATTATTGACTAAGCTAAGATAATATAGAGAGCTACAGTTGTACAAGGAACCCCATGGTATCTCATTTGAAAAGTTATTGTCTCCAAGGTCTAGAGCTTGAAGCTGTTGCACTCGCCCCAGCTCTATTGGTATAGAGCCAGTTAGGTGATTATGGTGCAAGACTAATTCAAATAGACTAGTGAAGTTGCTGAAGTGGAGCAGCCTGAAGCTGGACAGATGATTTTCACTTAAAAGAAGGTATTTTAAATTTCCCAGCATTGAGAGCTGGGTGGGAATGACTCCTGTAAGTTGATTAATTCCAAGGTTAAGGTTAAAGAGATGTGTGCAGTTTCCTAGGCTGGATGGGATGGTTCCCCTCAGGTTGTTTCCCCATGCAATTATCCTCTTGAGGCCAGATAGCGAGCCAAGCTCTGTGGGGATAGGACCGCTAAACTGGTTGGATTCCACATCCAGAATGATGAGGTTTGTGCAGTTGCCCAAACCCCCAATAATGGCTCCTGTAAGGATGTTCTCATTCAAGCTTAGCCTTTCAAGCTTACGCAGTGAACCGAGCTCCATGGGCATGGCACCAGTGAGCTGATTGTAGCTGAGCTCGAGGTCGGTGAGATGTGCACAATCTCCCAGACTTCGTGGAATGGATCCGCTCAGGTTGTTTTGCCACAACCATAAGCCGGATAGATTGCTTAAAGATCCCAGCTCTGATGGGATGCTGCCACTGAGCTGGTTGGAGCTGAGATCCAGCTGTAAGAGATGAGTGCAGTTTCCTATGCTCCGAGGTATGCTAAATCTGAGGTTGTTTTCCCGCAAAAGTAGCGTTAGGAGATGGGTTAGCAATCCTAGCTCCCAGGGGATAGAACCAGGCGTCAGCGGGTTAGAGTAGATCTGAAGATCAACGAGGTTTGTGCAGTTGCCGATGCTCGGAGGGATGACTCCTGTGAGGTTGTTAGTGTACAGGAGTAGTCGCTGAAGATGAATGAGCAAGCCAACCTCGGAGGGGATGGGACCGCTAAGCCAATTGGACGAGAGCTCAAGGCCGATGAGGCCAGTGCAGTTGCTGAGCAAGGTGGAAGGGATGGCTCCACTGAGGTTGTTACCCCACAGAAGTAGCTGCTGAAGAGGACTAGCGATGCTCGCTGGGGCTGGGATGGAGCCTGTGAACAAATTGTTGCATAGACCCAGACTTCCGAGAGAGGTGCAATTTGTGAGTAGGGTGTGAGGGATGTGACCGCGGAGGAGGTTGTTGCAGAGATCCAGAGCTATGAGAGAAGAGAGCGAGCTGAGGGATGAAGGGATGAAGCCGGAGAGGCTGTTGGTGTTGAGATCCAGCACTTTGAGAGAAGCACAGGCAGAGAGCTGCGGGGGTATGGAGCCGGTGAAAGAGTTGGAGACGAGAAAGAGGGCGCGCATGGAGGTGAGGTTGCCGAGGTGGGGCGCGAGAGAGCCTGCCAGCCCAAAGCCTGTGAGGTTCAATATATCGACGTGAAGCTGGCCAGCAAGTGAGCTGCTGCTGCTGCATGTGATCCCCACCCAGGATTCACAAACGCTCCGTGTGTTGTTTGGATCCCAGGTGCTGAGCAGCGCCCGTGATTGTGTGGAGAGGTGAGCCTTGAACTGCAACAGAGCATCCACTTCCTCTGATGGAATATTTAGCGGCACTGAAGTGGAGTACGCCGGCTGCATTACCAAGCTTAGCTGGCAGATGAGAATCAGAATGAGAGCAGCTCCCTGCTCCATGGCTGATGTTCTTGCGCAG |
| **HOPW1-1-INTERACTING 1 (WIN1):**  TTAGAACCTCCTCTTCTTCTAGCTGCCAGAATGATGCGTTGCAAAGTCAATTGATTGTTTGCATTGGCGAAACAAGTTTAAAACATGCGATAAATCTAGTTCTGATTGCTAGGTAACGAACACCCGGGCAGGCAGTCACCTGCAAGACTGAAGAACTAGAAGCATGATAACTAGTTCCTCACATGTATAAGAGATGCTAATGTTTATTTTGTTGGCTTCATGCAAGTAGGTGCCCTCGTAATAACATAAGCACTTGAGGTTTATACTAGAAATCTTGTTAATTACCTAAACATGCATACACAAGAAGTTTTGGGCATGCTACACCGACCCCCCTCCCCACAACCGCACCTAGCTAGGTATGCTACACCGGCTCGCCTGCTAAAGCTCAAGATGCTGTTGTAATCCGTAAAGGGGGAATTACAGTGGGAAAATGTTTAAAACTTCTTGTGGCACAACCAAACTTCCTTGGTTCTGTCAACTTCTGTGGAAGAGACGTGCCATTCTTTTTAAACTCTGGATGCCGCAAAAGTGAGTAGTGGGCGCGAGTCTGCACGTTGTTAAAATTTAGAAATTAGGGTTTAAGGCTTCAACTGTGCATCTTTTACATGGCTGCCCTGCAAACTTCATTGTGCCATGTCTCAAGCCGCCCATCAACAGAGAGCTTTTCCTACAGCCCCATTAAGCCTCCATGGCTTCCCAAGATTCCATCCATTTCATCTGCTAAGGCCATGGCTTCTCAGCACCCACATGCCATTGCAGACATTGACGCTCGCACAGAAGAAGGAGAACAACAACAGCATGCAGCTGAATTGGCGGCTGCCGTCTTATCTGTGCAACCCACAATGCATGCCTCCACCCAGGATATCATCAATGCTGAGTCGCGCTTGTTTGTCAAGACTTATGCTCGGTGTCCCGTTGTGTTCGTGAAAGGTCACGGATGCAAGCTTTATGATGCAGAGGGTAAAGAGTATCTAGACATGACGGCGGGCATCGCTGTGAATGCACTGGGCCATGGTGATGAAAGCTGGGTCAAAGCTGTTGTAGAACAAGCATCAGTTTTGGCCCATGTCAGTAACCTTTATCATTCAGAACCACAGGTGAAACTAGCCAAACGTTTGGTGGAATCATCATTTGCTGACCGCGTGTTTTTTTGTAATTCTGGTACGGAGGCAAATGAAGCTGCTTTGAAGTTTGCTCGAAAGTACCAACGATACAAGGCAAAGGAGAAGGGTGAGTCACAGTGGTTCAAACTTGGACAAGATCATCCAGCCACAGAGTTTGTAGCTTTTTCCAATTGTTTTCATGGGCGGACAATGGGGGCACTTGCTCTCACCAGCAAAGAGAAATATCGTGAGCCATTTGAGCCCATCATGCCAGGGGTGCAATTTGTAGAATTTGGAAACTTACAGGCAGCACAAGTAGCCATTGAACGAGGGAAAACAGCAGCAGTCTTTGTGGAACCAGTGCAAGGAGAGGGCGGAATCTATCCAGTGATGGTTTCTTTTATCAGAGGCCTTCGAAAATTTTGCGATGAAAGTGGAGCTCTTCTTGTTTTTGATGAGGTGCAATGTGGCCTTGGTCGCACAGGTCGATTATGGGCACATGAAGCTTATGGAGTTCAACCGGACATATTGACTGTAGCTAAGCCACTTGCAGGTGGCCTTCCGATTGGTGCGGTTCTAGTAACAGAGGCAGTAGCCTCTACTATTGAGTTTGGTGATCATGGAAGCACATTTGCTGGTGGGCCTCTGGTATGCAATGCGGCACTCGCAGTTTTGAACAGGATACAAGAGCCAGGATTTTTGGAAAGCGTTGCAGCAAAAGGAGACCTATTGCGAAGTTTATTAAGTGAGAAGCTTGGCAGTAATGAGCATGTCAAAGAGGTTCGTGGAATGGGTCTTCTTGTTGGCGTTGAGCTTGATGTGTCTGCTTCACCTTTGGTGAAAGCGGCGCTTAATAAGGGGCTCCTAGTCTTAACAGCAGGTAAGGGAAACATTGTCAGGTTTGTGCCACCTTTGATTATATCAGAGCAAGAGATTAGGCAAGGGGTGGAGATTTTGTTGCAGTGTATGCCTGCCCTTGAGGAGACATCTTAGAAGATTTAATAAACTTGGCCTGATTGTGATGGTTAACGAGGTTCAAAATATATATAACATGCAGCGGTGCCGAGCTTTTTGGAAAGAGTAAATTATGAATGATGCACTAGGCAACTCACATTTCGTAGAGTTGTCTTGCATGAATTTTCGATTATGCCCGTTGCTTTTTAAAATTTACGCTTCACAAATAAGTAATTACCAGAAAATTTGACAGAAAAGTGTGCATGCACATGTTTTATTATAGCTTCAAAAGCTAGGTTGCAGGTGGTGCACACTAGGTGTTCAAGCACTCCCCTCAAATATGCATCCAATAGAAACCCTCTTTCTTTATCAATTATCTTTCTTTTGCTATATTTCTTCTTTCAAAGCACTGCAATGGGACCTCCTTGCAAGCCATTCCCCCTACCAATACATCTGGGATACAACTTTTTTATTGACCTTTG |
| **HOPW1-1-INTERACTING 2 (WIN2):**  GAAGAAATCACATTTTGAACTCCACTGATATTGATTGCACTCCCTCAGGCCACATGCAAAGCAAACTTAAAGTCTTGTGCACTCATACAAACACTCTTTTGGTCTCTTTGAGGGAGCATCGAAAGGTAACCCCCCCTTTGTCCATGTGTGCGATATCTGTCTCTTTCTCCACCTTTTTCTCCTCGTGGTAATAGATTTCCAAAAAAAAAGCACATTTTTGTCTATCAATGAATCTTCCAAGAAGTGTAACAATTGCATCTATAAATTGCACGGTGGCAAGTCCTACATCCAGATGATAGAGCACGGGAATAGCAATAAGCAATCCCAGCTAGAGAACACAAAAGTGATGTAAGCTCAAATAATGATATGATCTTTCCTCAGCCTTCCCTTATTACTACTCGAACTGCTTTTGAAAAGGGGAAGGCCTGTCTATGCAGGTTTAGTGTTATGATATAAAATGAGAGCACAAATGCCGTGGGGCTCCGCTCTTTAGACGCTTCCAGCAAAGCATAATAGGAACCTCCCTTTTGAAAAGGCTCCATCCCTGTTCAAAGCTTAGAAATAGACTCCATCCCTGTTAAAAACTAAAAAATAGGCAGCATCCATGTTAAAAGCTAACATTACTCCAATTTTTAGGCTGTGTCAATATTAAACCGCACTACAATGCATGTGATGTTGTCTGCGCTTCCTTTCCGTAAAGCCTCTTCAGTAAGCTTTCTTGCTGCTTCTTCTGCATCAGGAATAGACTGAACCATTGTAACTGCATCCTGATTGGTCACAACATCCCATAAACCATCACTAGCAAGAACCAGAAATTCAACCTCATCATTGATGATCTCCTCCTACAAACCATTCGACATGAGCTAAAAACAGGCAGACCTTCCACAAAAAGTTAGTCAGGTAGTACAAAAATCCTTACTTGTCACCACAATTAACACGCGAACTAACAAAATTTGTTACTAGAACAATCCCCTACTTTAATTTTCACAATGTCATATTTGTAATCTCTATATGCCTAGGTTTTCAAACTTAAAAGGCCAGAAGATGCTCACTATCATAAAAGAAAATATCACACCTACTGTTTCAGCAACAAAGTACCAATATGACATAGCCCTGAGAATTATCTTTCCCAGGGCAAAGAGACATCTGCCTTACCTGAAGTTCAGGTTCCGCTACCACATACTGTTTTAGCAACCGATCACCAAAAGCTCGAGAAACAGCAAGCACCCCTCCCACTCTCCAAGTGCCAGCCCACATCACAACTCCACCAGCTTTTTCAATCCGCTGACGTTCATCCTTGCGATTGGGTTTATGATCAGTTGATAATGCAAAAGCTTTCCCAGCCCTGCAAATAACTGCTCTCGAATCACCCACGTTTGCAACTAGTAGACGGTCGCCCACCAGCACTGCAGTTGACGCAGTCGAGCCAGCATCTCTGTGTTGGCTGTTCTCGGCTTTTAAATACTCTGAATCCGTCTGTTGGTATGTTTCAACTATTGCACATCTTGTATCAGTTAAGAATTTGGGATGCTTGATCAGGTTCTCAAAAAGGTGTTTTTGCACATAATCTGCAGCACGAGAGCCACCATGACCATCGAAAACGCCAAAAAGGCCAACCGTAGAATCTCCAACTTGAGCAAATCGAGCCTCGTAAAAGTCTTCCATAGAAGCTCTTTTTCCACGCAAGCTTGAATATCCAAAGCTACATTTTCCATCATGACTTTGCCCCCCACCGCTTGCTTCAATATTTTGGCACTCACTAGTCATTGTTTTGATGAGAGCGTAGTTATTCCAACAGCATTTCTGGCAAGAGGCGTTGGACCTTAAACTGGCGATTGAATCCACACCTGATAAGCCCGAGTCTTTCAAGCTGAAGGCTTACATTTGATCTGGAAGAGGAAGAGGAGAGGTTGACCACAGAAGAGGGTAGGAAACCCTAATCGAAAACCTAGCTTTAATGGAAACTTGAGCCGACAACAAATTCGCGCCAAGCGTTCCCTGTGACTGCGAAGATGCTCTCACAACTCTGCTCAAACACTAAAATTGAGATGATCCCCAGCCGTTCGATCCCTACCCCATCCAACGGCTCTTACGATGCCGAGCTCTTTCGTAATCTTG |
| **LYSM-CONTAINING RECEPTOR-LIKE KINASE 1 (LYK1):**  CAGACATGCAAAAGTGGTACACAATCATGCTGATCAAAGCAATCCCACATGAAAGCTAAGCAAACATGCAAAAGTGGTACACCTTTCCTATCACCATAATACGAATGGAGCCTGTATGTGAGCTGAGTAGCATAATTACACAAGAAAACGAATTGAAAACAGCATTGTAGTGTATCAGAAAGCATTAATGAGAAGCAGCTAGAAGAGGAGCTTAATTTTTCCCTAAGCTTGCAACTCTCTTTATTGTTTAAGCTTGCAATCCTCTTCATTGTTTATGACACTTTCCAAGTCTCCCTGGGTATGTAACTACTTGCGACCTCTTCACAAGGAAGCGCGTGTTACTTGACCTATCATTGTACAGAGGCTCAAGCTTTACTTATTTGTGTGAGCACTTGAAAACACCAGGGGTGCCTGAGGGTGGCTTTAAAGTTTGATGAAATTTTAAGGTAGAGCAGGATGATTAGCTCAACCCAGGCACGCACCTCAGCCACGCTCTTGATTTGTCAAAGAGACGCCCGAACCAACAGCATCCACAGAAAAATTGCATTGCACATCCACTGGCGTCGAGAAGTAATCCAAAAACCAATGTGTGCAGGAGACTTTGAAAGGTGTGGTCACGAGAAATTATAAGTAGGCTTTTCCTCCTTTTTTGTTGGGCAAAATTCGATCGATGAATTCAAGCATATACAAGAAATATCTAGAGAAATACAAGTGAGCCATCAACGATAATAGATGGATGGGTAAATAGTAAATCTTCCTCGTTTCATTTCATTTCTGTCTACATCTGAAATATTCTGTACCTATATGCTGCCTTAGCTAAGCTCTTCTCGACAGGAGATTTCTCCAATATTTGAAAACTTTATATGTTAGTATTACTGATACAAATTTGGCATTAGAACAAGCTGCCGTGTTCCAGGCATAGATTTCCATGACGGTGTCCAAGGCCTGGAAGCTGCCAGTGTGGAATTTGTGGTTAGAAACCCAAAATCTCTTCTTCAAAACTCAGCTACCACATGGGGCACACACGAAACAGTCCGAACCAGCCCTTCATCATTTGAGCTTTCTCAAACTCCTGCTATTATTTTGAGGCTGCGAAAACAGCCTACAAAAAGAAGCCATAGCCTTATTCGTTTACATAGCAGCCCCCTCATGTTTCCACTTTACAAATGGCGGGCCGTCAATTTCACCTTGCCATCAAGACCCCCTCCATGCCATCATGATCTGCATCCCATTCCTGTGTTGAAGCGGATAGTGTCATGAGGGCCACCACCACTACCCTCATGTTGGGTCGCAAAAGAGGCTCTTCTCTGGTGCAAGCGCCTGCCAAAGTTGCCATCTTCCACACAGACTCCAAAGGGTAGTCATCTCCAAGTGCTGGATCTACTAGACTTCGAAGTTTCTCTTTTCCTTTGACTGAATCACTCAAGACCCCCTCGAACAATGTAACAAGCCCATGAGACATTGCTCTTGGACCCTGGGTCGTTGATACTTGGTCAACGTGATGTACGATTGCATCTTTGGCAGAAATGATCTCAAACAAAACAACACCAAAGGAATAAACGTCGGATTTTGCTGAAATATCTCCAAAGCGTGCATACTCTGGAGCCATGTATCCAAATGTACCCACTAATCTTGATGGGATAGTACTTGAACCAGTTCCAGATTCCGTTAGTTTAGTAAGCCCAAAGTCAGCAACCTTAGCACGGCAACTGTTGTCCAGTAGAATGTTGCTTGATTTAATATCACGGTGGATATAAGTAGGCGTTGTATGTTCATGTATATATTCCAAACCTCTAGCAGAATCAAGGGCTACCTGAATTCTAGCTTCCCAAGACAAAGGTGTGGTCCCTTCTCTTCCTGAGTATTTCAAGTGCTGGCTTAGGGTTCCATTTTCCACAAACTCGTAAACAAGAAAGAGAAATTCATGTGTACAAAAGCCAACAAGGCGGACCAGATTTGTATGATGAACGCGTGTCAACACGTGCAATTCAGCCAAAAACTCTTTGGTGGCCTGCATATTCATCATTTTGATTGCTAGCTTCTGCCCATGTAACTCTCCATAAAAAACAGAGCCATAGCCTCCTTGCCCTATCTTGTTGGCAGTACTAAAGTTGTCAGTGGCATCAGAAAGCTCCTTGTAAGAAAATTCGACAGACCTGTCTGGGCTGTAATATGAAAGCCCCGAGGACACTGTAGTATTTGAATATGCACTCCCTTCCGAAAAAATCCTTGGTGCTCCGGGTGACACAGTAGCAGTCTGAGGTGTTGCAGGATACTTAACCATCTCAGTGGCTTCTCTGTGTTTCTTGGGGCGATAGATACACACATAGAACAGAAAAGCTCCTGTCATTGCTAGGAAGAACACAACTGCACCGACCGTTGCTCCTACAATGGCTTTTGTATTACGGTGGCTCCCAAGTCCCGTGCTGTTGAAAGGTGGGTACACACCATTTCCATCTTGTGCTGGCACAAAAAGTATGCTGACATATTGCTGAAGAAGATTGAGGTTGAGGTTTTGATTATATCTCTGCAACAAATCAACAGAGATATTGAACTTCTTTGAAAGCGCTGCAGCATTGTCATTCTCCACGGCAACATAGGTAAGAAAGAGTCCGTATGATGAGTTGATATTAGGGTCACCACAGGAGCAATTAACAGGGATAGTGAGTACGTTCTGGGGATAGATAGCGCTCAAATCCTTGTCGTTGTTGACGCGCAACATTGCATTGTAGGTGGTGAGGAACCCATACTTGTCATTAGCTATTTCTATGGCCGTGTCACCGGTAACCACTGTGTATGAAAAGTTGTGCCAAAGGAAGTTGTCTGCGCATCCACAAGCAAAGGGGATGCGAAGCGGTTGGTCCGAGAGTATTGCAGACGATGCATTGAGCTGGCTGTACCAACGAATGTCCCTCTCATTTGCCCCAAATCTCTTCGCTACATTGGACAAGTTTCCATCAGCAGCTGAAACAAAGGTGTAGTATGCTAATGCGACACTACATCCACTTGGGGGCATGCAATCAGCATGTGCAAATCTAAACATTCCTGGTAACAAAACCACTAACAAGAGGCAAACAAGGTTCATCCTTCCACCCTTAAGCATCTCAATAGTCCTTACTAAGGGCACCAGCTTATGATTTAGCCCTTTCGCGCTCACATTAAATCCGTTTGTAGAGGGTCAATTTCTCCCTGCCTGAAAATTATTCAGAGGCCCTGCTTGTTTGGCTGCCAATGTGCAGCTACATCATAGCCATGACCTCCATCTAAGAATGCGAGAAATCTACTGCTGAATCACAAGATTTCAAGGTGCCCATATTTGATCAATGCGCTGCAACTTGCTAGATTGAGCAGTAATTCGAATAAAGTGATGGGTATCTGCAAAGCCTTCTTGTAGAAGCTCGTCTGTATCAAGAAGAAATGGAAAACCCACAAGAACCTGCTCAACTTCGCAGAATGAAGCACCCAAATTAGAGCTTCTGAGGCCTCGATTAAACAAGGAAGAGCTTGACTATGGCGATGAAGAAGATGAAGATGATGGGGAGACGCGATTGCTGAAAGCGCCGGCGTGACGACGAAGACCCTGAAGAAAGAAGAGGCCAATTCGAAATAAAAGTCAATATCTGTAGGCAAG |
| **RNA-DEPENDENT RNA POLYMERASE 1 (RDR1)**:  TTTTGAATTGCAACATCAATAAATGTGATTAGAACAATAATGTCTCTATATTTTTATAATTACATTTTCCTGAATAAGGTGTTTGAGATGATCAAATAATTACATAGGGATAGTATATATGTAGTTTTGATCGCACGGGCTTCATTTGATGTATGATAAATACAAGGTACATTTCCAATGTTTCTCTTAAGCTTTAAGTTAGTAAAGGAGCAAGATGACAGCAGGAAGCCAGAGGCCATGGGCTGGGGATTTTCCTCGCCAGTCCCCGTCCCCATCGCGCCTAACTAGTTATGATGTGCCCCTTCTACAGAAGCTCATGATGTCGAAGTTTTCTCACCCTTGCAGCCAAGCCTCTAGGCTATGCTTACACTGGATAAGCATGAGCTCAATTTGCATGCTTGCACTGTGCCTTGGGTTTTCTAATATTCCGAAAAAGGGGTTCTTGTGCATGTTCACAAACATGGTCTTCCCTACTATGCCAAGAAAGGGCTCGCTGACACGACACGGGCCTTAACTGTGCCAACTAAGCCCATTCAGATGAGCATAGCCCTATTTCACTATTCAGCAACTCCCATGTTGCTAGCAATTCGGCAATTCAGCACTTGCCTGCAAGTGGCCCTTTCAAAAACCAATCTAGTTGCTCTTGCTTTACCATCTTATGTCCGGATCGTACATTACAATGCCACAAAGTGGCTTTTCATATTATACAAAATATCATCGAACGGTGTGATGTTTTTGATTCCACCCTTTAGCAGATTGTCATCTGCAATCTGTATCCCTTTTTGATGGCTGAGAGCCTGTCATGTACCACCCAAGGGAAGCTGAGAAGATGCTCGTGTTCAAATCCATCATAAACATTGGACTCAATAACATAATCTGGATGATAGGTCACATGATACCAAGCTGAGGCTTTTGCCAACTCTTCATGAGTATACTCTGGGGAAACATCATCATGATTATCATGCATACTCACTCGGTGACTCCTTAACCAGCTTCTCGCCTCCTTCTTTAAAGAATTCATGCTTTTTTGGATCCTTTCTTTTACTTCTCCGGGTCTTTTCTGATAGAACCTAGACAAGCTACGGATGTTTCCGGTAAAGATTTCCGCCTCGCTTTTCACATCGTATTGATACATCAAAGTTAGAAGCTGTTCATCATAATAGCCTTTCTGTGCATGTGCTTCTTCCACATACTGCTCGAATCCACATATTTCTAGTTCTCTGTCATAGAATTTTGCTGCTTCATGCTTAGTAAAAGGTACTATCATTTTGGCATCACAGTCTTCTGCCACTGCCCTATAAAGCTTTCCAAGCACCCTCTCTGATGTATACGTGGTTTTATCATCCTTTTCCATAAAATCAGGGTATGTCCTTGGCCGAAGCTCAACAGGTAATTTTGCAGGAACTCCAGTCTTTGGAAAGTCAACAGCTATAGAGCATAACTTTGCAAGGGCCAAACACTTCATATCATAGGCCTGTGCTTCTTCAGTATCGGCAAAAACTGTGTGCGCATTTGATATGAGACCTAGGCTGTCATTTGTCATGAAATCCACAAAGTATTCTTGGATTTCCTGGATTGTCACTGGATGATCTTGCACTTGTGTTGGGGATGCCTGGTAATCCATTGGTGGAGCTGCTACTGGGGGGATCAGCTCCTTGTCCCAGCTCACAAAATACAAATCTCCATCAAGATCACTGCCTGAACATTCATTTGGATGAGGCCTGTGACCCCGTTGTGGGAATACAATGCAGTCAACAAGATGATGCAAAGCTGGAACATTGACGGCAGCCAGCACTCGCACATCTCCAGGATGAAGACAGGGATTCTTTGCCACAATTACCTTGCCTTCTACAATGCACACATTTCGAGTTGCCCCATTCATCCCATGAACAGTTATGGGACGAAGTCCATCATCAAAATACTTGTAGGGGCATCCAGCCCTGGGTGAAACACTCACAAATACTTCCCCATAATTCAAGACTGCTGCCTCATCCAAGCAACCCATTAAAAGCCGACCTTTCGCAACAAATATGCGTGTCTTTCTACGAAGCTGCATTAGTTGTACCACTTTAAAAGCATACAACATCCTCTTTAGGAAGGGCTCCGAACTAGGTTCATAACCCGCAGAAATCATGTCCAGTATAACCCTTTGAGTATCACCTCGGCAAAAGGTCTGCATAATATCCATAGCCACCTCACCATCCTCTAGCATTTCATCTAACCGTTGCATTACCTTCAGCTGCATTCTTTCAAAAACCAAGTCATTGACGCCTAGCGTGGACAAAAGAGTGATGATTTGGCGATTAAGGTAGCTTGGTATAAAGTGGCTCCAGTTAAGAATATCAAGACCAATTTGTTTAGAAGGAAACTTTTCCATACTATCCCGCAATGACAGTTTGTAAGTGCTACTGGGATCAACAGCTACGACTCCTTTGTAACCACTATATCGCACCTGATATAATGATGGCATTTCTCTGTTGAGTCTTTTTAGCTTGCACTTTTTGGCCAACTGTGTAGCAAAATCTTCTGAGATTTTTCCTATGCCATCAGAGAAGCAGTATGTACATGGGTCATCCCAAATATCAGGGATAGTTTCAACTTCATTTGGGTACACATCCACTGCTTTTGTTGAAGAACTGAAAGATTGCCCCATTCTGGCTGCACATTTTGCCACATTTCTTATACCTGAAAAATCCCCCATCCATTCTCGAATGTTGGTTGCTGATGTTTTGCCATCAGATGCAAACATCCATATGCTATTTTCCCGTAGTTGACTGCTAGAAAATGCCAGAAATTCAAATCTTTTGCTGCCTATACTGATACCATCCCTGAGAATAGCAATGATGCGCTCATACACCTTTGTGTGCTGCTTCTGCTCAGAGAATGGCCATTCCCATGACTTTGATTTTTTTAAAATCATAAGCACACTGGAAGAGAGACTGTCATAGTTCTCTTCAACAAAAGAAACTCTGAGAAAGTTCTCAATGCTGTCAATAAATTGCCGGGTTACTCGATTTGATACAACTGCTTCTGGTCCCAAAAAATAGACTCTTGAGGGAGTCACATAAACCCTTCGAACCTCTACGAGGGCATCATTTGACCAGCTCTTCTTTGTTCTTACCTGATACTTTTTCCTTAAAAGTTGATGGGTTTGTTTCTTGAACCATACCTCTGGATTAAAGCAGGTGTCTTCTCTCAGATTTAACTTACTCAACACATGTATGACATGCTTTAGTGGCAACTTGTCAGAAGGTTGGATTAGCTCAAAGAATGTCTGATTGAGGTTAGGCCCACTTAAAAATCCTTGCTGCACAAGCGAATTCACCAGGAAAATCAGTTGAAAAGGAAGACTACAAGGTAAGTTGAGTATGGGAACATTGATATTGGAAACACTGTAGGTAGCCCCCTGTTTTATTGACAAATATTTCTCCTTCGACGAAAGATCTCTAAGCTCTGAAAGCTTTCGTAGCAAAGTCTTCAACTCCTTCCCACGTTTTTCAAACATTTCTACACAATAACTGAAAGATTGGCCAATGCTAGCATCAAGAGAGAAGTCAGTTGTTCGAGCCCATGCAATCTTGGCACCCTTGCCAAAGAGCTCAAATGCATCCTCAAAAAATATATCAGATGCACATGGAAGCTGTTCGTATATTTGTGGTGCAAGCCATACCTTAAGAAGTAGGCCTTGGCTGTTTTTCTTGTCTTTGATCTTGCATGGATGGATATCGAAGATGTCACGGAGGCGCCATTCAAGCTTATAATTATTGCCAGACAAATGCAACATGATTGCAAGCTTTTTAGTGCTATCATCCACTGTGAGTTTCACATTCTCAGCTGTCCACAATTCATGGAGCACATCATGGCTGACAAGACAGCCCGCATGAAGAGTTGAGTTAGCAGCAAGGGTTGCATTGTCCTGTCTTATATGAATTGGGTTTTCCCTTTTCCTGTGAGCGGGCTTGATGGCAAGCTTGGTGCCCATGAAGCCTAACCGCTTGAAGCTTGCAAGGTCACATGCCCTCCTTGCTGCTGTCTCTGTTGTAAACTCCACTACGGCTGAACCCCTCAGTTTCCCGGCTCTTGTGATGGACAGGAAACGACAATCTGTAACTGTCCCTTCCCCAACAGCATTCTCCAGAAAGGCAGTGAGTTGCTCAACTCTGTCGATCTCTGGAACACGATGCACATGTACAGTGCATCCATGCTTGATTTCGCTAGAAAGGATGTTACTGTTTTCAGCATGCGAGAGCTTGAAGAGCTCCTGAAGAAGAGAGTAGCCCTGCCCTCCTTCATGTTCCAACGTGTTCGCACCTTGAAGTAGCTCTGTAAGCTCTGCATAACCTGTGGGCTCCATGCGCAAGCACGCTATTTTACTGTCTATGTATGAAAAGCATCATCAAGAATGAGAGCACTGACTGTACACTAGTCAAGGCGCGAGTCAAGCAGCCTGCCCACTCCAT |
| **SUPPRESSOR OF GENE SILENCING 3 (SGS3)**:  GAAAATATAAACAGTACCAAGCCTATCAAGTGTCATGTACCAATGGTACCATACTAGAACTGAAGACAGGTATGCTTTACATGTTGGCCCCAGACAATATGAGGTGCTCATTTGGTAATTGATGCAAACAATTAAGTGAGCCCAGAACATTAAAGAAGGCCTAAAGCTTCAAACAAGACCCAAGAGCAGCACTTTAGCGAACTAGTATGACTGAAGTTTTCAAAATTGTGTTATCCCAAAGCTCCCTTTTGGCAGGACACACACGTCATACAAGATCAATTCCCACAGATTGATGTACTCAATAAAGACCTACAAAAGGGTCTTACCTAACATTCCACCAAACATGCAGGAAAAATAAAAAAATAAAATAAGGCGATTGGGCACATGTAGGGGATCCTTATTGCTTCCATGGCTTAGATGTCTGATGAGAGTCTAAAACTTTAAAATCCACCTATTCTCTAAATAATCGTGGATATTCAAGCTTGACAAGCATGCTCACTATACTTGTCTAGCAACTGTTGCCTCTCTTCCTCAAGTCCTTTCTCAAATTCAAGAGCTTCTTCATACTGCTTCCTCATAAACTCCCTCTTTCTAATGTGTTGCTGCTTCAAAAGTTCTCGCTTACTGCACTCATAATCCTCGGACTCCCGCAAACTCGATTCAAGAATCTGAGTCTGGTGTGCAATCGCTTCTTCCACTTTGGCCTGCTTGGGCTGTTGTTCTTCACCGAGCTTCTTCTCAAGCTGTTGACAGCGCTCTATGTGCTCTTGCTTGAACTCTTCTTGTTTTACCTGAATCTCTTTTTCTCTTCTTGCACTGTTTTTCTGGAGCTGAATTATTTGGCTCTTGTATGAGTTTTCAAGTTCATCCATTTCTCTTTGATTCTCCTCGTGCTGTTCTTTAGCTCGCTGTCGTACAACAGAAATTTCGTCCTCTCTCAGCTCCAGCTTCCTCGTGAACATGCTCATAGATTTTTCCAAAGTTTTACTATGTTCCTTCTGTTTCTGCACTTTAATTTTATAATAATGGAGTTGTTGATTATCCTCATCCATTTGCCTCATGGGCTGGGCAACAGCCTCATGGTATTTTTTCAGATCCCACTTGAGCTTGGATTTACCTGAGCTGTGCCTGTTAAAAATCTCCAAGTCTTCAACAGTTGCCATGTATCCATACAAGATTCGGTCACCTCCTGGGTGGAAAATGCTTTTGCTCGGTTGATCCCAATGCTGCCTTCCTTTACGAGCATCCTTGAAATTCTTCACCAAACGTTCAGCCGAATAATATCCTGCTGGTGAGTCTGCAAATATGACGATACTCATTCCACGATGGCCTTGAGGACCATATGCATGTCTGGCTTTCAATGGGTTATATTCCTGAAACATATCTAGCAGCTCCTTGTTTCCCATCCCAATCCACTTTTCTTGCTCATCTATCTCAAGTTGGGTATTTTGTATTACCACCATAGGAGGCCAAACAATCATCAAATCTCTAGTAGCATCGTCGTTGTGCAGCCCTTTCCACTTTCCAAACTTAGTTTCACCCATAGATCCTGTCCCTGCTTTTCGCCTTTCAAGATCCTCTTCCAATACTTTGGCAAACTCTCTATGCAGCCCAATTCGTTTTGTTCTATGAGTTTTTGCATGAGCTATGAGTGGTTGCAAGCCTCTGTACCAATCAATTGCACCAACACCGCCATGGCAGGCAGGACAATGCCACTGACGATCATGCTCTACAATCTGCTCATTGGTGAAATCATCGAGCGTGTCAAAGAAGGACTGAAACCACTTATTCCGCTTTCTAGTATCGAGGCTTTTCACACTTGCATCAGAATCACAAGGGTCACTTCCAATCCAGTCACTGTCATCATCCAGATCAGCATCCGATAGCGCACTGTCGGAATCAGCTCTACCTGGTACCTCATCAAGGTCCGGAGGAGGATAAGAAACTCTACTCTCTGTTCTTGGACCTGAATTTCCTGATGTACTAGTGCTTGCAAGTTTTGAAATTTCTCTTTTCTCAGAGGGCAAAAGTTGTGACAAGATGCTGTCAGTTGCCTCCTGTCCGTTCTTCACTACTTTGGCCACAGAGGGCATACCCCACGCTTTAACCTGAATCTGTCCTTGAGCATTTTCTGTCAAATTCTTTCTGTTCATTCCCTCACCGTGATTGAGAATTTGAGGAGCAAATCTAGAGTTGTCCTGAAAGTTTCTCGGTCTTTGAGCAGCCACATCGCTAATCCTCCATTGTTGAGTGCTGCTACTCATGCATCCAAAACCAGCTCCTTCACTATGCCCGCCTGTGCTGGATGTGCCAGAATAACCAGCTCGATCGCCTTGTCCATTAAAGGAGCCTGTTTTCTCATATCTATGAGTAGGAGAGAGGTGGCCTGTTCTACTGGGTGAGGAGGGGAAACCATGGTTAAGCGAAGCTGATAGATGATTGGTGGGTGGAGGCGGATTAGGGTTCAATGAGACCTGCCTAGACTTCCGAGAGCTTGCAACTTGCCACCCGTCGTCATGATGCATTGTTGCATGTGAGCTATGGCCGGGCATTGGGCCTGCTCCTATGTTGAGGTTCTTGAACTCGCCTTCAAAATGGGCTCTCCCCATACTATCTTGCCTTGCTGGTACGCTGCCATTACTCTTGTTCTTCTTCTTCTTCTTGATCTTTCTTGGCTTTGATGGGCCTTCGGGATATGTAGGCATGGAGATGCCACCAGTAGGACCATCTTGCTGTGAGCAACCTGTTGCCTCGTCGTCATCTTCTACCTCGCTTGCCCATGAAGGCTTCCTGTCACTTACCGAGTCATGGGCCGCCATGGGAGCCTGCAAGCTTTTCTGGGAAGACCTGATACAAACTTCAAAGTGCACACGAGAAAGAAGAAAGCATACTCACAGCTAATGAAGCTCGCCATACATTATAAGAACGTGGCTAACTACCTGAAGTTTCATCTTCTCAACTACTTCATCCGCCGCGGTGTGTAGAAGTGTAAGCGCGCGCCTACAGAGAGAGAGAGAGAGAGAG |
| **EMBRYO DEFECTIVE 2728 (EMB2728)**:  GAACACAATAACGGAACCACGTGTGACAATACCGCATGTGTATATGGCAAGGATGAGGCCATGTCAGCATCCAGCGCGTGGCATAGTATGAAAGGTGGGATAAGGCATAGGAGGTTTTCAACCAGGAGATGGGGAAGCCACGTGGCAGAATGAGAGGCTGAAAGAAGCCTTTGGAGAGCACACTCTTGCGATCAGAAGAGGAGAGCTTCGACCGCATCCTTCGCTCCTCCATCTTCTGATCGCTCCTCCATCTGCAAGCAGGCAAGCAAATTAGCAATGGCGGCGGCCCTCTCCTCCTCCTCCTCCATGGCTGTCTCAGTCCCTTCGCGGAGTTCTTTCCTCGGAAGCAAGGAGCAGCTCTGTAGTCCCTCCTCCGTCTCCATCTCTTCAAGTAAGATATCTCTCCCTATCGTGAGAGCAACATCCCGTGTTGACAAATGCTCAAAGTCAGACATCATTGTGTCTCCTTCCATTTTGTCTGCAAATTTTGCCAAGCTGGGCGAGCAGGTGAAAGCTGTGGAAGATGCTGGATGTGATTGGATTCATGTTGATGTGATGGATGGGAGATTTGTACCAAACATTACAATTGGCCCACTGGTGGTGGATGCATTGAGGCCTATAACTGACTTACCCCTTGATGTGCATCTTATGATTGTTGAGCCAGAGCAAAGAGTTCCAGATTTTGTGAAGGCGGGCGCAGATATTGTCAGCGTGCATTGTGAGCAGTCATCCACCATTCATCTTCATAGGTCTATTGGTCAGATCAAGAGTTTGGGCGCCAAAGCAGGAGTCGTGCTAAACCCTGGTACCCCTCTGACTGCCATTGAGTATGTCTTGGATGTTGTGGATTTGATACTCATCATGTCTGTGAACCCGGGATTTGGAGGGCAAAGTTTTATTGAGAGTCAAGTAAAGAAGATCTCGGACTTGAGACGGATGTGTGCAGAGAGAGGCGTGAATCCCTGGATCGAGGTTGATGGTGGGGTGACACCTTTGAATGCTTACAAGGTGATTGAAGCTGGAGCTAATGCGCTGGTTGCTGGGTCTGCAGTATTTGGTGCGAAAAGCTATGCAGAAGCAATCAAAGGTATCAAAACTAGCAAGAGGCCAGCTGCCGTGGCTGCTTGAAGTAATATACAGGCGTCATGTTTGCAGTGCACATGTTCCTAAGTTTTCCAGTGAAAGGCGATGTCTTCGTTTTGCATATTCCCAAGCTGTAGGCTGGATGGTCTACCTTGAGCTTCTTCCCCCTCGGAGGGGGACTCCTGAAAAACAGAGGATATAGATTGGCAGCTTGGAAATTTTCAGATGGGTGATTGTCAGAGGTAGAGATATGGTCATTTTTAGGCTGCCTGGATCTTGAGAGTATTTTTTCTCGAGTATTTGTAATAATACCAAAACAAGCAACACCCTCATCCCTGTACACAATCAATTTTGTGCTTTAAGTAAGAAATGCCGTGCCTGTCGATGTATGTTTGTCATTAAAGTATGCCTGTTGTTACTCTCCAAAAA |
| **BRASSINOSTEROID-SIGNALING KINASE 1 (BSK1)**:  GAGAGAGAGAGAGAGAGAGGTTAAATCTGTGCTTCCTCAGTTCCGGAAGTTTTTCCTGCTTTTTCTGCTTGGATACAATCAAAGGTTTCTTCCGCCAAAGTCAAACTTGTGATGAGCTGACAAGTTTCTGCTTGTGCTATCTTCCTAAGCGATGGGCTGTTGTTTTTCACGGCTCCAAGTCTTGCAACATTCTGATGTTGATGCGACACCCCCGGAGTCAGATACTGTTGGTGCCACGGAAGGTCGTTCTGTGCCAGCATTTCGCGAATTTTCTATAGATCAATTGAAGGCTGCAACAGATGATTTTAGCCATGAAAATATAGTGTCGGAAGGAGGTGACAGAGCACCAAACATGGTTTTTAAAGGATGTTTGGATAACAAATATTGGATTGCAGTAAAGAGGTTTCCAAAAACTGCATGGCCAGATCCCAGACAATTTGCAGAAGAGGCTTGGGGTGTTGGCCAGATTCGCTCTAATAAAGTCGTCAATCTTATTGGGTGCTGCTTTGAGGGCGATGAACGGTTCTTGGTATCTGAATATATGCCCAACGAAACCCTTGCCAGGCATCTCTTTCATTGGGATCAGCGCCCAATGGAATGGGCAATGCGGTCAAGGGTTGCCTATTATATTGCTCAAGGGCTGGAACAGTGCAGCAATAACGGCCGCCCACTGTACCATGATTTGAATGCGTATCGTGTTCTTTTTGATCAGGATGGCAATCCACGTCTTTCATGCTTCGGTCTTATGAAGAATAGCAGGGATGGGAAAAGCTACAGTACAAATTTAGCATACACACCTCCTGAATTTATGAGGACTGGAAGAGTGACTCCCGAAAGTGTCGTTTTTAGTTTTGGTACAGTCCTCTTGGACCTGTTGAGTGGCAAGCACATACCTCCGAGTCATGCTTTGGACCTGATAAAAGGGAAGAATATGCTGTCATTGATGGACTCACATTTAGATGGTCAATTCACAACAGAGGAAGGAACGGAACTTATACGCCTGGCTTCACGCTGTCTCCAATATGAACCAAGGGAGAGACCAAGTGTAAGAGCTCTTGTGGCATCGTTGTTGCCCCTTCAGAGGAAAGTTGAGGTACCTTCCTATGTAATGCTTGGTGTACGAAGAGAGCCACCTTCTCCACCCCCACCTGTTGTTACTCGTCCTTCGGCACTGCGGGATGCTTGTTCAAGGATGGATCTTACTGCAATACATGAATTCATGGTGAAACTACACTACAAAGATGATTCTGGTGAGAGCGAGGTAAAGTCAATGGCATCCTTAGTAACCTTTTTCTGTGCAAGCTCTTGGTTTCTGTTTCTTGATTGCTCAAATGTTTTCTGACTAAACAACGTTTGTTGCTTCTGTATACATATGATATGTTTTGTGCGCTTTCTAGTAATAAACTAAAGAAGACTATGGAACGGCAAGGGCTTGAGAAAGACCATAACCCTCTCAATAGCATCAATTTTCACATTTTCAATATATCTTTCTTAGCTGTTAGGAGTCTCTCTGATTAATGATTTATATATCCGGCCCGTCTAGTCGTTGGATGTAATTGAAGTTGTGCTTTTTGGTCAGCTTTCTTTTCAAATGTGGACAAAGGAAATGCAGGACATGCTGAACTCCCGGAAAAAGGGCGATCTAGCTTTTCGCGAGAAACATTTTACGACAGCTATTGAGCGGTATTCCGAGTTTGTACAAGGAGGTGCCATGGTGTCTCCAACGGTGCTTGCAAGGCGTAGCTTGGCTTATCTTCTGACAGATCAGCCTAACCCAGCTCTTCGGGATGCAATGCAAGCCCAGTATATCAATCCAGAATGGCCAATAGCATTTTACCTGCAGTCCGTTGCGCTAGCGAAGCTCAACATGGAGAAAGAAGCAACAGACATGCTCGAGGAGGGAGCAAGTTTGGAGGCAAATAGGCAGAGCAGGACGTAGTTGTGTAGTGTTTTTTGAAAGCAAATCATAGTTGTGTGTATTATCTCCTTGTGTACAATGTCAATAGAGTTTCGATTGCCATGCAGATAAAGCCTTGTGTGACCACAGCATTTCGTGGTCGCAAAGAGTCGATGCGCGAGAGCAAAGCTAAATCTTTATGCAGGTTTATACCCATTCTTTGGAATTGTGTAGGTACGATGCATTGCAAACAAGCTGTTAGCTAAAGACATTCCAACCAGGCCTCTCTCCCTCTCTCTCTCTCT |
| **NON-RESPONDING TO OXYLIPINS 7 (NOXY7)**:  CGCAACAAAAGAGATTTAAGCAGCAGCAGCGACGACATGGCTTAGCTACACAAGCTCGGATCTCTGCAGAGTTTTAGTTTACAGAAAGAAGAAGAGCAGAGTTTCCCAGCAGCTTAGATCTTCATGGCGCTCACTTTGCAGGCTGCATCTCAGAAATTAAGTACCTCCTCCACCAAGTTGCGTGTTGCCATTTTTAGGGCCAGCGTTGTCTCTCTTCTCGATAACCCAGGTGAGAGTATTACAGAGTATGCTGCATCCCTGGCAGACTTGATCTTTGACACACTGCACCTATACAATGATCGGGCTTCTCAGTCAGCAGTTGAAGTTGTTCTTGTTAGAGCCTTGAAAGAACCATCATTTGTAAAAGTATTTACCGGGATGCTGGTACAAACAGCAGATAAAGCTACAAAAGCTGGAACCTTCTCTGTATATTACAAACTGTTAAGGTGGTCTTGTCTATTATTGAGATGGAATCCTGGGATCTTAACAGCAAAGGTAGCATTCTCAAAACTGGCTGCAGTACAGGGGGCTCTACTTTCCCCTCTGCTTCAGGCTGTTTTTCGAGTAAAAAGAGCAACTAGGCGAATATTTTTCCATACATTGACAGAGGTTCAAAGCCTTTTTGAGCTTTACATGAATGAGTTGAAGGGATCACATCTTAGCACAGAGTCTTTATCTGGATTGATCGCAATCTTGCTAGACTATTGCTCTTCAAAGTCAACAGAACTTTTTAACAACCATAAGGACCTGTTTTTAGACCTCTATATTAAAACTGTGCTAAATTCGAAGGAGAAGCCTTCGACTGTTTTAAGCTATGCATTTACACCTTTGTTGAAGAAACTGGCACATGACGACTTCGGAAAAGTTCTTGTACCAACAGCTGTAAAAATGTTAAAGAGAAACCCAGAACTGGTTCTGGAGGCAGTTGGTATTCTTTTGCAGTTGACAATCCTAGACCTGAGTAAATATGTTGGTGATCTTTTACCCGTCTTGCTTGTTCAAGCACGGCACAATGATGAAAGCAGGAGAAAAGAATCGGTGGTGGTAATTGGGAATCTTGCTTTGCAGTCTAGTGATCCAGATGCAATATTATCAATGTTTCAGATCATAAAGTCGGTCATTGGGGGGTCTGAAGGAAAGCTTTCTTTTCCTTATCAGAGGGATGGAATGATCAATTCTTTGCGTGCCTTATCCAATGCGCCTGGTGGAAAGACACTGACTCAACTGGCTGCAACCATATGTCTTTTCCTTATGTCCTACTATAAAGAAGATGGAAACGAAGAGGTGCGCACATCTGTACTTCTAGCTTTAGGAGTGTGGCTTTCCCGAACAGGAGACTTGGTCCCTGAAGGTGCACCAGCGTTTTTCTTAGCTGGGTTAAAAGAAAAAGAAACCTTACGCCGCTTTCATTTGCGATCCCTTCGTTTGGGCTTTAGAAATTCACACTTTTGTTTGAAGATGCATTCGTTGTCAGAGACTCTACTTACTCTCAGTAAGAATTGGGCAACGAAGTCTTCTCAGCGAGTGGACAGTATTTATGCTCTCTTGATTTTGTTCCAGATTGCTTCAGTTGATATCAAAGCTGATGATAGGATAGCAAAGGAAAAGCTTTGGGCATCCGTTTTACAGAAAGATTCTATCATTTTTTCTACATCCTTGATAGGAAAAGTGCAAGTTGAAGACTGTGTTGCCCTTGTAGAGCTGATTGAAGTGATCATTCTTAAGCATTCTTCAAGATTGTCGGAATACGAAATGGGGAGCCAGCAGCTTTTTCAGCTCATCGTCCACTTTCTATGGCATTCGTCAGGGGATACAAGAAGACTCGCTTTTGAAGCTGTTCGTCACATTCACTCTGCTTCTGCAAAGTTTTCGGAAAGCCTGTTTGATGGCTTTCTATCATGGCTTACTTTGTTTGAAGATCAGATAGGGGTTTTTAAAATGAGCGAAACAGAGAACACAACAGATGGATCGTTACCTCATAGTGAAGCAATAGTGAAGGCTTTGATTGCTTTAGCTGTGCCAACCATGTTCAAGGATTGCAAACTGAGTGCCCGAATTTTGCTGGCCTGTCATCATCCTTGTGTTGTGAGAGGTCGCCAAGCAAACGCAGTTTGGAAGGTGCTTCTCAGAAGGCTGAAGGGACAAGGTTTTAATGCTGTTGATGCTCTAGTCCGTGACACAAGCTCTTTGTGTGAGGTATTGTTGGGACATAATGGGTTACACAGTGAGAAGTTATTTGAGTCACAAGCTTCACTTCGTACGCTTCATACTATCATGCAGACTATTCCTATCGAGTTCTTTCCGAAGTTTCTAAATGCTTTTGAAGGTCTAATTGATAGGGGTGCTCATGATGGACTCAGTGAAACTGATATTAAGATCTTCAAAACAGAATCGGGAACCCTTTCAACGGAACAAGGTGTGTATATTGCAGAAGTTGTCACAGACAAGAATGTAAAGCAAGCAAAAGGACGTTTCAAAATGTATGAGGATGATGATCAGGAGCCTGTCAAGACTATTCTTCAACCCCGACAAGCATCCTTGAAGGAAGCACCAGGTCCTGGAAAGAAGGATGCTTCTAAAGCTCCAAAAAGGCCTGGTGAAGCTGAAAAAACAAAGTCAGCAAAGGAAGAAGCAAGAGAGTTGCAGCTCAAAGAAGAGGCGGTAATACGGGAAAAGGTTGGCTATATCAAACAGAATTTGTCCTTGGGTCTCAAAGCTCTTGGTGAAGTGGTTTCAGGGAACCCGGTTATCGCCCATGAGCAGCTTCCCTGCCTGGCAGAAAAAGTTGCACCATTGTTGAAGTCTCAAATTGTCAGCATAGAGGCATATGAAGCAATGGTAGGGCTTGCAGGTTGTGTTGCACCCTCATTACGACACCTGGCAACTGATTTGGCAGCATCTTTAACTATCATATCCACATCTCACATTTCCATTCTTCAAGATCTCGTCAATGTTTCCAAAGGACCTGATTCACAGAAGAGAAAGCCAACTGTCATAGAACGTGTTGTTGCTGGTTTAGTTGTTGCCTGCAAAGAAGGTCCTCTACCCGCGCCTTCTTTTGCCTTTGTATTCCCGATCATGGAGCAAGTTTTGGGATCACTTAAAAAGACAAATCTTCATGATGATCTGCTGGAAGTTATTTCTCTCCACACCTCCCCTGTCACGACCTTACCAAGGATTAGGATGCTGGAGGTGTTATATCATGTACTTGGGTGCATACCCACATATCAAAACGATATCCAGCCAGTGCTGTGTGAACTGTGTGCAGGTTTAAAGCAAGAACATGTTGTACAGGCACTGATAGGGATATACTCTCAGCATGCACATGTTCGAGCGGCATGCCTGTTTGCGATTAAGTTTGTGCCAGCTTTGAAGAAACGCGCAGTGTCACATGATCCAGTTTTGGCAACCACCCTATGGATTACACTTCATGACCCTGAGCAGTCAAATGCAGAGGCAGCAGAAGAGATATGGGATTTATACAATCATGAATTGGGCACTGAGTTCAGTGGCCTTTTCACAGCTTTAGCTCATGTTAACTACAATGTAAGACTGGCTGCTTCGCAAGGCTTGACTTCTGCTATGGATGACTTTCCCAGCTGTGTGCAGGAAACCCTATCTACATTGTTTTCCCTTTATGTGAAGTACCTGCCCTCTATTTATGGTGAATCAGATCCATTTTGGACGGCTAGGCAAGGGGTAGCTCTTGCCTTAAGTGCAGCTGCAGATGTTCTGACCATGAAGGATCTTCCTGTGGTGGCAACATTTCTGATCTCGCGCGCTCTGGGTGATCCGAACCTGGAGGTGAGGGCAAGAATGGTAGATGCTGGCATTGCAATTATTGACAAGCAGGGAAAAGACAATGTTGGGCTTCTGTTTCCCATTTTTGAGAATTATTTGGACAAGAAGGCTGCTGATGAGGAGCAATACGATTTGGTTCGAGAGGGTGTGGTTGTTTTTATGGGTGCACTTGCCAAGCATCTGTCAATGGATGATCCAAAAATTTCAGTGATTATCGAGAAGCTTTTGGAAGTTTTAAAAACTCCATCAGAATCTGTACAACGTGCTGTGTCGGACTGCTTACCTCCTCTTATGCAGTCTCAACAGGAAAATGCTCAGGTTCTTCTTTCAAGGTTGTTGAAACAAATGATGCAAAGTGAGAAATATGGTGAGCGTCGTGGCGCGGCTTTTGGTTTGGCTGGAGTAGTGAAAGGTTTAGGCCTTCCCAGCCTCAAGAAATATGGTGTAATGGATGCACTCAAAGCTGGAGTTGAAGACAGAAACTCAGCTAAGGCACGCGAAGGAGCCCTGTTTGGCTTTGAATGCTTGTGCGAAAAGCTTGGAAGATTATTTGAACCGTATGTTATCTATATCTTGCCTCTCCTGTTGGTTTGCTTCTCTGACCAGGTAGTTGCGGTTCGTGAAGCAGCTGATTCCGCTGCACGAGTAATAATGGCTCATCTTAGTGGGCAAGGGGTGAAGCTTATCCTGCCAGCACTACTTAAGGGACTTGAAGACAAAGCTTGGCGCACAAAGCAAGGCAGTGTGCAACTGCTCGGAGCGATGGCATTTTGTGCTCCTCGTCAGTTATCTCAGTGTCTGCCATTAATCGTCCCTAAGCTGACCGAGGTTCTGACAGATACACATCCAAAGGTACAGGCTGCTGCACAAACTGCATTGCAGCAGATTGGAAGCGTTATACGAAATCCTGAGATTTCAGCGCTTGTCGCAACTCTACTTTTGGGGATCTCAGATCCTAATGAGAATACAAAGCACTCTCTGGATGTCCTTTTGCAGACAACATTTGTCAATACAGTTGATGCACCATCATTGGCCTTGATAGTTCCTATAGTGCATAGAGGACTGAGAGAACGAAGCTCTGAGACAAAGAAAAAGGGGGCACAAATTGTTGGAAATATGTGCTCTCTTGTCACTGAGCCGAAAGATATGCTTCCTTATCTTCGATTGCTACTTCCGGAAGTTAAAAAGGTTCTCGTAGATCCAATCCCCGAAGTACGCACTGTTGCAGCTAAAGCATTGGGTTCACTCATCAAAGGCATGGGAGAGGATAATTTCAAGGATCTGGTACCGTGGTTACTTGAAACTTTGAAGTCAGAAGCAAGCGGTGTAGAAAGGTCTGGAGCTGCCCAAGGATTAAGTGAGGTACTTGCAGCATTAGGTACAACACAGTTTGAATCCTTGCTTCCAGAAATAATCCAGAATTGCTCTCACCAACGAGCTGCTGTTAGAGATGGATATTTGACACTGTTTAAGTATCTGCCAACTGCTTTGGGGCCTATGTTTCAGAAGTATTTACAACGTGTTCTGCCTGCCATTTTGGATGGGCTGGCCGATGAGAATGAGTCAGTAAGAGATGCTGCATTAGGTGCTGGCCATGTTCTTGTCGAGCATTATGCAACCACATCACTTCCCCTGCTTCTACCTGCTGTGGAAGAAGGCATTTTTAATGACAATTGGCGTATTAGGCAAAGCTCAGTAGAGCTATTGGGTGACCTACTGTTCAAGGTTGCAGGAACTTCTGGGAAAGTTGTTTTGGAAGGTGGCAGTGATGATGAGGGCGCTAGCACTGAAGCACAAGGACGTGCCATTGTGGATGTGCTTGGTAAAGATAGGCGTAATGAAGTTCTTGCTGCAGTGTACATGGTTCGATCTGATGTAAGCCTTACAGTCAGACAGGCTGCCTTGCATGTATGGAAAACTGTAGTAGCTAACACTCCTAAGACCTTAAAAGAGATTATGCCAGTTTTGATGAGTACCCTTATCTCCTCCCTTGCATCTACTTCATCAGAACGTCGGCAGGTTGCCGGTCGATCCCTTGGTGAACTTGTCCGTAAATTAGGAGGCAGAGTGCTCCCATCAATCATTCCTATCCTCTCTGAAGGATTGCAAAAAGGAAACGAAAGTACTCGGCAGGGTGTTTGCGTTGGTTTGAGTGAAGTGCTGTCTAGTGCTGGGAAAGACCAGCTCTTTGCTTACATGAGTAGTCTGATACCAACTATTCGGGATGCTCTTTGTGATAGTGTTCCCGAAGTGCGTGAAGCAGCAGGGTTAGCTTTTAGCACTCTTTTTAAGAGTGCAGGAATGCAGGCAGTGGATGAAATTGTTCCTAATCTCTTGAATGCTCTAGAGAAGGATGAAACCTCAGAGACAGCTCTTGATGGCTTGAAGCAAATATTGAGTGTCCGTACAGCAGCTGTGCTTCCTCACATATTGCCAAAGTTGGTGAAACCACCTCTAACATCCTTGAACGCACATGCTTTAGGAGCCTTGGCAGAAGTTGCTGGCACTGGGCTAAATTCTCACTTAGCCACAATACTACCACCTTTGATATCTGCAATGGGTGACAAAGAACAGAGCATAGAGCCCATTGCAAGAAAAGCTGCGGAAACAGTTGTCATGGTCATAGATGAAGAAGGTCTTTACCTTCTTATTTCAGAACTTGTGCGAGGTCTTAGTGACACACAGGTGTCAGTAAGAAGAGGCAGCGCATATTTGGTTGGGTTTCTGTTCAAAAATAGTAAGATGGACCTTTCTGAGGAGGCTCCAAACCTGATCACAATGTTGGTGGTCATGTTGACGGATCCAGATAGCCTAACAGTGACAGCTGCTTGGGAGGCTTTGTCTAGTGTAACTGGCTCGATAGCAAAGGAAAATCTTCCCAGTCATGTCAAAGTTTTAAGAGATGCTGTGTCAACAGCCAGAGATAAGGAGCGACGAAAGCGGAAGGGAATGCCTATTACCATTCCAGGTTTTTGTCTCCCGAAGGCATTGCAGCCCGTGCTTCCAATTTTCTTGCAGGGCCTGATGAGCGGATCAGCTGAGTTGAGAGAGCAGGCAGCGGAAGGGTTGGGAGAGTTGATTGATGTGACAAGCCCTGAAGCATTGAAGCCATTTGTTGTTCCCGTGACTGGTCCTTTGATTCGCATCATAGGAGACAGATTCCCTTGGCAAGTGAAAAGTGCAATCCTAGCAACCCTAGGAATCATCATAAGCAAAGGTGGTATTGCGCTCAAACCATTTCTTCCCCAGCTGCAAACGACTTTCATTAAATGCCTTCAGGATAATTCAAGACCTGTCCGATCTAGGTCAGCGTGGGCATTAGGGAAGCTGGCATCTTTAAGCACCCGAGTAGATCCCTTAGTAGGCGACCTTGTGAATGGACTACAGGGATCAGAAGGAGGTGTGAAGGAGGCCATGCTTATTGCTTTGAAGGGTGTATTAAAATATGCAGGGAAGAGCCTGAGTGCACCAGTTTTATCTCGAGTAGTTTTGACCCTGCAGGAATTTCTTCCATCTGACGATGATGAAGTGAGAGGGTCGGCAGCAAGAGCTCTAGGCATGGTTTCACAGTTTCTTAAAGAGGAGGACCTCAGAACATTGCTAGGTGGTTTGTCAACAATGGGGCAAGCTCAAGGATGGGCATTACGACATGGTGCTATTCTTGCAATATCCTCAGTATTGCGTCATACTGCTACTCAGATTTTTTCATCATCATTATTGCTGTCAACAACAGTGGATGTAATTAAAAGCAGAAGTCGGGATGATAAGGTACCTGTTCGTGACTGCGCTGCTAAGGCATTAGGCAGGCTCATGGTTCATCAGGCAAAGACACATCATCCTGGACCTTCATTCACAGACTTGATGCCTCTTATTGTGACTTTTCTGAAGGATGAGTCAAGTGATGTGCGAAGACGAGCTTTAAGTAGCTTGAAATGGATTGCAAAGGCAAATGTAGATATGGTCAACCCCTTCATGAACTACTTAGGTCCAGTTCTTGGAGAGCTAATAAAAGATGGCAGTACTCCGGTTCGAATGGCTGCAGAGCGCTGCGTTTTCCATGTCATGCAACTCAGTAAAGGACCGGATGCTGTGGCAGCATCTCAGAAATATCTAACAGGTCTTGATGCCCGGCGCATCTCTAAGCAGCAAGAGCAAAGTGATGCGAGTGAAGACAGTGAAGATGATACTCCAAGCTAGTTAGTCATTTGATACAGAGCTTTGGTGACTATATTTTTGCCTTGTGGATCGGCTTTGCATCAAATAGGTCAAGCAGCAGCTTTAACTCCTTTGCTGTACATACACAGCAAGCTCTTGACATACGAGTTCTTCAATTCAGAGAACATAAGAGGGCTCAAGGAAAATGGCAGGAACAGTAGAACCCCATAAGAACGAATGCGTACTCCCTACAGCTGGTCATTGAGCTGGAGTATAGCTTCCATATCATAAAGATGCCTGCAAACTGCTGTCATTGCCCGAGTATTCATGGCGAAGAGCACCTCTGCTTCTCTAGAAAGGCAAAGCTGCAGTATGGGGAAACCCTCTCCTCGGGTAATTCACAATCGCTGGTACGAATTTTGTTGGCAGAGTGTAATTCAGCTAGACTATTTACAAGCTTCTACATCTATCAGTTTTTCAGAGATTTCTTGATCTGGTAGTAGGAGGCTGTAATATACTGGCTAGGTCGATTTTCTTCAACAGTCTTATAGTGGAGGCCATGGCATTTGTGCCATTGAGGTTTTGTGACTAATGTTGGTTGCACTTATGGTCGTTTGTATCATATGAGGCTATACGGTAATGGTGAGGAGTTGTTGATTGACTTAATCTTATTCAATGCTTGTAATGTCTCAAGGGGATGCACTCACAAATTATGGAGTAAGTTAAAACTGGAACAATGTATCTAGTGTCTTTCTGTTTTAAAAATCATTGAATAAATGCATACATGAGGGGGGCTTGCTAGTCTCCACCTCATAGCCGGAGAGTTGTATCTCCAGTAAAGACTTTTTCCCTTGATCATTTTTGGAAGGTACAAGATGATTAACCTTTTACCCTAGTGTGCAAAGCAAGCAATCGGAATATGTTATTACCAATTAGATGTTTAATGTTGTGAAACGTGGATCGGTGTATTACCATATATGTCCCATAAGGT |
| **SERINE/THREONINE-PROTEIN KINASE/ENDORIBONUCLEASE IRE1A (IRE1A):**  AGAGAGAGAGAGAGAGAGTTGATCACCGCCGTCTTCTACGCTTACAGAGAAAAAGAAGGCATAGCAGAAAAGAAGACGAAGTAGCAGCACCAGCAGGAGAAGAACAAGCACAAGCAGCAGCAGCAGACTTGGACGAAAGCTTCTCAAAGCCCAATTTCATCCCAATCTAGCAGAGAAATGCAGAACAAGGTTCATTAGAAAAGAGGCAGACATGGGCAAATTCTTCCGCAAGCCCTTTGTGCCTGCATTTTTTCTTGCATTTTTCTGCTTCACAGCATCGTTCACTGCAGCTCAGCCCGTCTCCGAATCTTCTGATGCATCACCATCTTCATTGCCTCCACCATCCCTGCCTCTCCCTCTTGGAGAAGATCCTGACAAATTTCAGGTGACTTTGGAGGTTTTGTGGGATGGAATGGTGACTGCTCGAGATTCTCTTACAAAAGAAGTGAGGTGGTCATTTTTTTCAGGAAATCCTCTAAGCTCAGCTCATGGGATTTTGCTGGATGCTTATGAGGGTACAAACTCATCCATCGGTGTAACAGGCGATACTCTTATTTCTGAGGACGAGTTTCTTTTCTGTGGCACAGACTGGAAACTCTACTCTTTTGACAAACAGAACGGCATAGAGGACCTTCCCATCCCACCTCATGAGCTCATACAAAACACTCCCACCATCCTGAATGGGGATCTCATTCTTGGCACCATGTCAACTTCTGTGTTTCTTTTGGATGCAAAGTCTGGGAATCTGGTACGCACGTTTGAATCAAGGAATGAATCGTTTTCAGCTGATCACTTTGGCGAAGAAGACATATGGCGCTTTTTAGAACTTAATTTTGAAGAGCGAAGAAACTCAGACTACCTCTTCGTATTTAGGAAGGATTACACAATTAAGTCTGTGTCAATGGCATCAGGAGCACTTTTGTGGAACGTAAGTGTGGCAGAGGTTCAGCTGCATCACATCAATTCTGATGGCATTCTTCGTCTTCCAGGAGGAGGGGAGAGAAGCAAAGAGACATTCAGTTTGTTAAGCCAAGCTGTTCCACCACCCGTTGCGTTGCCAGCCAGCTATGAAAGGAATGATCGGTTTCTTCCAGCTCAAGTGCAGGTATCTCAAGATAGTGCATTGCCCTTGGCACCAGCTCAAGTGCACACATCGCAGAATAGTGCATTGCGGTGGCAAATTGGACTTGGATTTACTGTCCTGACGACCATGGTATGCGTATTTGTCACACGTTTCTTCTGGAAAAGATCTACACGAAAGCAAAATGAGGAGGAAAAGCAGGCTCCAAGGAAACGGAAGGCCAGGAAAACAAAGGCAGTGGCCGGAGTGACAGCACAAGAGCCTCCACAAGGTGAGATTGGTCCTCTTCAAGAAAATACTAATAGCTTGCAATCTCATTCAAAAGCAGATCCACTCATGGATATAAATCAGCCAAATGTCAAGTATCATTTTTTAGGGGGCCTGTGTGTGACTGATAAGACTATTGGTTGTGGAAGCAATGGAACCATTGTATTTGATGGTTATTTGGAGAAGCGACCTGTTGCTGTCAAGAGGATGCTTACGCAATATTATGATAAAGCTCAGAAGGAGATAAACCACTTGATAAAGTCTGATGAACATCCTAATATCCTGCGCTATTTCCATGTGGAATCAGATGCACATTTTGTCTATGTTGCCTTGGAACGTTGCCGGTTCAGCTTGAATGATCTAGTTCTTGCCCAAAGTGCTCAACACTTAGGAGCATACGAAATCAATGTTATGCCCGGAGAACATAGCAGGGAGGAGTTGAAAGTTGTTCTAGAAAAGGTTGGAGACACCAAAGATTGTCAACTATGGGATGAATGGGCTCGTCCATCTGCAAAACTTTTGCAGTTCATGAGGGATATTTTGGCGGGACTTTCTCACTTGCACGAGGTGGGCATAGTGCATCGTGATCTGAAACCCCATAATGTGTTGATAAGCGGTGGGCGACTGTCACAAGCAAAACTATCTGACATGGGGATTAGCAAAGAGTTGGCTGATGGAATAACCTGTCTAGACACGCAGTCTACAGGTTCGGGAAGTTCTGGCTGGCAAGCTCCTGAACAGCTTATGCGGCAGGGACCACAAACGAGGAGTGTAGACTTGTTTAGTCTTGGCTGTATACTGTTTTTCAGTATAAGTGGAGGCTACCATCCATTTGGTTCACGTTTGGAACGAGATTTTAATATTGTCAATGAGAAACTTGACCTTTTTCGAGTTGAGCATGTGCCTGAGGCGACAGATTTAATATCAAAATTACTTCAGCATGATCCACATAAGAGACCCCAGATGAGTACAGTGAGGATCCATCCTCTTTTCTGGAGTTCTGATATACGATTAAAGTTTCTATGTGATGCTAGTGACCGCGTGGAACTAGAGGATAAGGAAAACCAGTCGCCTATTTTAGAAGATCTTGAGGAGGTATCACAGCTGGCTCTTAGTTGTTCCTGGGCTGACAAACTAGATGCTGTTTTTCTACAGAATCTTGGAAAGTATAGGAAGTATAACTACAATAGTGTTCGAGATCTGCTTCGAGTCATCCGTAACAAGTCCAGTCATTTCAGAGAGCTACCTCAAGAAGTTCAACAATTATTCAATTCATATCCAGAAGGCTTTGAGACTTATTTTAGATCCAGGTTTCCCAGGCTTTTGCTTGAGGTGTTCAAAATTTTGTACAGACATTGCGGCAATGAGGATGGATTCAGAAAATATTTCTCATATGATTTGTCACTTCTGTGAGGGGATGCAGTATCATATTGTTATCGCTTGAGATTCTGATACTCTTTGTAAACTACAGCAGGTATCAAATTAGACAGCTCAAAATACCTCTCTTTTCATTGCTAGCCTGTCATGTCTGTTGTTACTCTTGTGAAGCATATCATTGATCGCTGTCCTTTTTTTGCTAGAGCGAAGACTCTACCTCCTGGGACCCTCAGAAAGTCACATGTTTAATGTGACGAGGACGTTTAAGTTAAGTTGTGCGTTAAGCTCCATGTGTCCAAGGATGTCCTTTGAAAGATAACATGACTAGTGGGAGCAAGTTGCATGATACTTACTAGTGCTGGCTTTGGCAGTATTTGATCTCTGAAGTCACCCATTCCTTCCATTCTCATTGCCCATGGCAGCACCAGTAGCAATGGTTGTATAACAATCTGCTCATGGAGCCTTGAAATCAGCTTCTGTTCGCAGTTTTATTAGTGACACAGGAAAACGGTTAAATTTGTGTTTGTGTGTGTGTGTGTTTGTGTGTG |
| **PLANT U-BOX 59 (PUB59):**  TGCTGCTTGCAGGGTTATTGCAAGATTGAAGAAAGAAAGGGATGAAGCACATAGCTTACTTGCTCAGGCAGAGAGGCTTTTACCTGCTCCGTCTCCTATGCCAACTACACTAGCACTGAGCAATGGAAAACGAGCTGCTCCAGAGAGTGATCAGGAATCTGCAGCTGCCAAACGGGCTCGGCAAGGAATTACTCCTGAAATGATCAAGGAGCTGACCGATTGCAATACCAGGCTATCAGCGCAAAGAAAAAAGCGCCAGGTTTCTCAAGATTTGGCACCCCCAGAAGCTCTGGAGACCTATACACTACTCTCCAGTCATCCTCTTCACAAGACAAACAAGCCTGGCATTTTGTCAGTGGATGTCCACCAATCAAAGGATCTAGTCTTGAGTGGTGGAGTAGATGCCAATGCTATAGTGTTTGACCGATCTTCTGGAGAGATAGTATCAACCCTGAGCGGACATAGCAAACGGGTCAATAGTGTTAAGTTTGTTCCTCAGGGTGATTATGTTTTGACTGGATCGGCTGACAAGACAGTCAAAATCTGGAAAGCAAACGAGGATGGAGTTTATGAGTGCAGGCACACTGGTCGAGATCACACTGGAGAGGTCCGTGCTGTGACTGTACATGCAACTCACAACTATTTTGTAACGGCATCATCTGACAAAAGCTGGTGCTTCTATGATCTTACCTATGGAGATTGTTTGGTTCAGGTGGCCGAAAACACAATGCAGGAGGGCTATACATCAGCTGCATTTCACCCTGACGGGCTTATTTTAGGCATGGGAACAGCAGAATCCTTGGTACGAATTTGGGATGTCAAGTCTCAGGCCAACGTTGCACAATTTGAAGGGCATAGTGGACCTGTGACTGATATATCTTTCTCGGAAAATGGCTATTTTCTTGCTACAGCTGCTCAGGATGGTGTGAAGCTGTGGGATTTAAGAAAGCTGAAGAATTTCCGCTCCTTCTCACCATATGATGCTGATACACCGACAAATGCAGTGGAGTTCGACTTCAGTGGAAACTATCTTGCGATAGCTGGATCAGACGTAAGGATTTATCAAGTTGCAGGTGTGAAACAGGATTGGAACACCATCAAGGTCTTACCTGATCTGTCTGGGAGAGGAAAAGTAACATCTATCAGATTTGGGCCACTCGCGAGCTACATGGCGGTTGGGACGGAGGACCGGAATTTAAGGGTACTTGGTGTCCCCATTGCATCAGTGGAGTCTTGAACTGTAAGGCACACATTGACTGGTGTTTGGGAAGAGCTATTTGCTTACTTTGTTGGAAGGCCTTTCGTGTATGGGTCACTGACCATGGGGAGGACATCGTGCGTGTGGGGACTGTAGAGACTTGTTTAAGGCTTAAAAGCTCCTTGATGGTTTGCGTTAACTTGGTGAGGGCAGTCCAAATCTCCTCCTCCTATCAGTTAAGAGATCTGAGTTTGCTCATCTAAAAAGTGCTCTTTCACTAAATTTTGTGAGCTAGTCTCGTACGAAGTGAACCAGTTTGAAACCTAAAACCTTGGCGACGTACTGCTTTCAATCATCAGTTTAACAGATCCCATTGCAGCAATAGAATGCATGTACGATTATTTGACTATTTGAACTAGATGGCACAAGCGATAGAGTGGATGTACTAGCGAACTGGTCCAATTCTTGTAATTCAATTCAAAAGTTTACCTCCACTTCATTATAGTGGAGGCTCTCTCTATTAGCACTGCTAATTCTTGACACTAAAATGCTGCAGCTTGTGCCATCTACCGTTTCTTCTCTCTTGGATCTTTGCTTGAGCTTTGGCCTTGGGTATGTGATATTCATGCGGAGGATCAATGCATAATTTGTTTGAAATCTTCAAAGGGGGAATTGAATGCAGCAGTTCCCACGCTCTTCATGATACAAGCTTTAAGCTCCTTGCTCAGCACATGTTGCTTGAGAAGAACTGCTTGTGTCAGAACAGAGGTAGTGATATTACTATCGTCCAAAGGTAGGTTAATTTACTATGGCCTTTACAAACATCAATTCTAGGTGGCGAGCTTGTTGATACAGCTGCTCTGGCTACCTTTTTCAAGTGGTAGTATATCCTTTCATTCACCAGGGTACATCTATTCTGGGTGGCAAGCTTGTTGATACAGCTACTCTGGCTACTTTTTTGCGTGTGCATGTGCGTACGTGTTCATGCAGATACACACAGTAAGTTGCTGGAATGGTTGAGACCAAGTATGACATTGGAATACTGATATGAAAAAGTTCATTATTCTGGAGGATGTTTGACCGACACATGTCGAGGTAATAGGCTTGGAGAACTTTGTGGGCCCTAGGCACATCCACCAGATGGAGTTCAGCTGCCAACAAGACCCAAGAACACGTGTCTGGCATTCATGTTGTTCACCTTCTTATGGAGGAATACCTCTTTTGGCAATGAGCTGATTGAGTTGCTTACGCTTCGTTGATGGAACATTTTTATTCTCAGTCAGCTGATCTGTTGATGAGGTTAATCTTTTGATGTATCTCTATATGATGAGATAATATTACACCCTGGATGATGCCAATGTAAAGACAGACTAATTTTTTTTATTGTTTTTGGCTGAGCCAGAAAAGGTTGGGTGATTTACATGGCCCACATATTTACCTTATTTTATCGGCAGAAACAGGCCCTTCTGTTATGATTTTTGTACTTGAGATGGTCCATAGTTGCGTTAGCTGCTATTTTGAAAGATGATGAATACTTTGAGGCTCCTCCAGGAGAGATTTTTA |
| **SUPPRESSOR OF CPR5 44 (SCPR44):**  TTAAGTAGTAAAGATCGTACATTAGGTGAAATATGAGAAAAATAGAACAAAGAGTAGCAGAGCAGGAGACGTAGAGGATGCCGGTGTCTGTAGAGAACGCGCAGCCCGTAGAGCCTCAATCGCTCAAGAAGCTCACCCTCAAGTCCCTTAAGAGATCCTTCGACCTCTTTGCCTCCTGCCATTCCCTTCGGCCTCCTCCCAACCCCGACAGTATCAGGATTCGAAAAGCTTGCAAGATTCTTGAAGAATATAAGTCTGTTAAAGATTCAACAGTCTATCCCATACACGATGGGGCGAGTGCTACCCCTCACACAACTGCAGATGGTGGTCCTCCACTTGCTCTACCTGCACCAGCTGAGGCAGACAACAAGGTTTCAGAATTTGCTTTGGCTATCGTTCCTTCTCAACCTTCAGGAAGGGCTGATGGTGCAGTGGAGTCTTTGGCTGCACCGACATCGTCCACACTGTCAGAATACAAGCCCCCAGAAAGGTATCAACCAAGTGCTGCAGTTATGAGAAGGCTTCCAAGCAAGTGGCCTCGTCCTGTGTGGCATCCTCCTTGGAAGAATTATCGGGTTATCAGTGGCCATCTTGGGTGGGTCAGGTCAGTAGCATTTGATCCCGGAAATGAGTGGTTCTGCACTGGATCGGCTGATAGAACCATAAAGATATGGGATCTTGGAACAGGGCAGCTGAAGCTGACTTTAACAGGGCATATTGAACAAGTTCGAGGCCTTGCAGTCAGTCCAAGGTTTCCATATATGTTCTCTGCTGGAGACGATAAACAAGTGAAGTGCTGGGATTTGGAATATAATAAGGTCATACGCTCATACCATGGACATCTTAGTGGAGTTTACTGCTTAACCTTACACCCGACCTTGGACATTCTCTTGACTGGGGGACGTGACTCTGTTTGTCGAGTCTGGGATATGCGGACAAAAGCACAAGTCCACGCTTTATCTGGGCATGAGAATACTGTTTGTTCAGTTATTACTCAAGCTATGGACCCTCAGGTTGTAACTGGGTCACATGATACAACCATTAAGCTTTGGGATCTTGCTGCAGGAAAGTCCATGTCGACCCTCACGTTCCATAAGAAGTCGGTCCGAGCACTAGCAATGCATCCTTTTGAGCATTCTTTTGCATCTGCATCTGCTGACAACATCAAAAAGTTCAGACTCCCGAGGGGAGATTTTCTGCATAACATGCTGTCTCAACAACGGACAATAGTGAATTGCATGGCAATAAATGAGGAGAATGTGATGGTTTCAGGAGGTGATAATGGAAGCATATGGTTCTGGGATTGGAAAAGTGGCCATAACTTCCAGCAAACACAGACAATCGTTCAGCCTGGATCTCTTGACAGCGAAGCGGGGATATATGCCTCGTCCTATGATATTACAGGGACTAGGCTTGTCACATGTGAGGCTGATAAAACAATCAAAATGTGGAAGGAGGACGAAAATGCAACCCCTGAGACGCATCCAATTAACTTCAAGCCTCCCAAAGAAATGCGGCGGTTCTAAACAGAGACGGCGCTTTTGCTTAAGGATTGCGATGTACGATTCTTTTGCCTGCTGCGTGAAGAATGTTAGAAATGGAGTCTCCGCAAGGGATATAGTCTAAATTTCAAAGCTTTGGATTAGTGGAAAGTCGGCTCATGAAAATACTTGGCTGTGTAAAGGCACCAGCAAAGGCACTTGAGGATTTTTCTTTCTGCAAGTTTGTGTTCATAGTCTAATAGGCAATGGCAAAAGACTTTGAGATGTTTCTTCTAGTGCTTGCAGTGTGGGTATTAATATGGGATTACGACACTTACTTTACAACGATATGGGTCCACATGCAGATTAATCTGCATAAAATGCAGCAGCAGTCTCTGTGGATGCTGGATTTCTATTTTTGATTTTTTTTTTTTTAAATGTGGGCAGCATAATATATTAGAGAGAAGCATACAACCATGAGAAGCATACAACACTGAGTTCTAGCTCAGTTGGTAAGGTGTTTGACTGGTTATTCCCAGGTCTTGGGTTCAAGCACCGGCTACGCTCAGAAAGTTACCTTACCCCTGCCTTGTGGGATTTTTTTGGGGGGGGGGTGTCCCATCCTTGTGGTCATTTTGAGAAGTGTTATGCCAAATTTACATACTTTTGACTAACAGGTTTTCATTACATTAACTTTCGGAAGATCACCAAAATTTTCGACATCTGTATTATCGATAATATGCTGTTATTATTTCCAAGTCAGATTGGTTTTCATCGAAGCAAATATTGAAAGAACGACTTGTATTATGTTCAATTCAAGTATGGGTGTATGAAGTCTTAGATTAAGGGGCCTTAAGACCCTGCTTTTATGTTTGCTGAAACAACTTTAGCTTTTTAACCTGCTCTTCTAAATTAAA |
| **ASPARTYL PROTEASE APCB1 (APCB1):**  CGTGAATTAGAATTGCCAGTCAGCCTCCCGAGGGCGAGGAGGAGCGCGGGGGAGATGGCGCACTCTGAATGCAGCTCTACAATATTGTAACCCTCTGCTTCTTTCTGAGTTGTACTCTTCGTGTAATCACGATTCACGCTTACATTTTCCTCTTCATGAAGGAACCCATTTTTTCAGCCTAGATTTTCTGCTCATTTTGCCCCGCTATGGAGGATGGGGGTAACATTAAAGGCATCTTTATCATCAAGCTGCCACCGCCTAATGATCCCTCTCAGAAGAAGACGATCACAGGAGCTTTAACCTTTGCGGAAAACCCTCATACTGAGCTAAATCCGTATCACCCTAGTCTGAATCCACCTGATGTAGGCGATGACGAAGACTACAGGCTTCCTTTGCACACAAACCATGAAACCTCAACACCTCTTCGACCTGCAAGGCGAGGGTTCCGCTTTCTGAAAAGGAAAGGGCTCGCTTCGGTTCTGTTTGTAGCTGCAGTTGCTTACTTCCTATGGCAGTATGGACCTTCAACTCTCAAGGAAGAAGTAGAACTTGACTCTGATAACACAGAGGAGTCGCAGCGAGCTATGGTTTACAGCATCTACTCCAAGGTTGCGTTCTACCCCAATTCAAACTCTTCTTGGGCACCTTCTATTCCTGCTTACCCCAGCAACACCACCCCCATTTCTCCGTCTGCCATATCCAAGCGCGCCGAGAGGGATATTGTTCGTAGCAGTACCAGGGTTGGCAGTGCAGCAGAAGCAGCGCCTTCTGCCGATTCTAAGGAAACATCCACCACCATTTTTCCTCTGCGGGGCAACATATATCCTGATGGGTTGTACTATGTATTGGCTAAGATTGGCAATCCTCCACGGGAATACTTTTTGGATTTGGACACAGGAAGTGATCTTACTTGGTTACAGTGTGACGCCCCTTGCTCCAATTGTGCCAAGGGACCTCATCCCCTTTACAAACCAAGGAAAGCCAATCTTGTGGACTGTAGTGAAGCAACTTGTGCATCAGTGCAAGCAGGAAGTAAGTTTGGGTGCGGTCAGGGCTCTGGCCAATGTGATTATGAAATCATGTATGCAGATGGGGGGTATTCCTTGGGCGTTCTTGTCCGCGATCAACTGGCCATGATGCTTACCAATCGCAGCTTGGGTTACACAAAAGCTGTTTTCGGGTGCGCTTATAACCAGCAAGGTTCTCTAGCTAAGTCTCCGACTTCCACCGATGGTGTGTTGGGCCTGAGCTCTGCAGCAGTATCTCTTCCATCTCAATTGGCAGAACAAGGACTTATTAAGAACATTTTTGCACATTGTATTGCTGGAGATGGTGGGGATGGAGGTTATATCTTTTTAGGTGACAAGCTGCTGCCGTCGCGCGGCCTAACGTGGGCACCCTTGCTTGGGAAACCAGCAATGAAGAGTTACATGTTAGCAATTGAGGATGTCCAGGTTGGAGATACCTCGATACGTTTGGGTTCTAATGGCTTTGGAACAGCCATCTTTGATAGTGGCACTTCTTACACTTACCTGATCTCCTCCTTGTATACAGCCATTGCCACAGCTATCCAAAACAGCTTAGTTGGCAGTGGCTTTAAGCATGATTTGTCAGACAACACTCTACCGCTTTGCTGGAAACATGGTGTTCCTGTCAGTGCACTCAACGATGTGCTGCACATTTTTAAACCTATCATATTTGAGTTTAGAAACAGTGGTGGCTGGTTCAGGAGAAACAGTAAAATGCAGTTAACACCGGAAGGATATCTGATAGTCAATTCTAAAGGAAATGTCTGCCTTGGGCTCCTAGATGCAAATGTTATGGGCAATCATGGGTCAAGCATAATAGGCGATATTTCAATGCGGGGAAGCTTGGTGGTCTATGACAATGAGAACAATCGATTGGGCTGGATGAAACAAGATTGTAGGAAGATCCCGAAAGATGCTGTTTTGTCTCCATCAGTTTGACAGTGGTCGTAAGTTTTCATGGTCTTTTGCTGAGTTGTTGGGTGTTTGCTATTTTTCATGAGAAGATAAAAGACCTTGTCAAGAAAGTGGATTGCTTTTTTACCTTCATAAACTATTCAAAGGATGGATACTCGAGCATTGGTAGGTTGGGTTGGTTATTGGAATAGCCACCAACGATTTCATGTTTGCAGGCCTTTTTAACACATGGCTGACATAATGCAGGTCCGTTTTGGATGCCATACATTTGGCAATGCTATTTGAGATGACATTTACTGTTTCTTTGCCTGAACGCTCCTGCTGACGAGGGGCTGCCTAGGTATGGTGCTACAGACTCACCAGCTTCTTACAGTGGTCCTTGATGGGTGTTTTTTGTCAACCAGGGGGTCTATTATTAGAATATACACGCTCGAGTATATCACTTCATAAGTAGCAAAGATTTGTGTGTGAATATTAGCCTTGGGCTCAGGAGGTGCTTATTTGATTTTACTTTTGGCAATTTGAAGAAAGGCACATGAATATTTGTATTGAGTACTGTACTATCATGAACCAAAATATGATGTATGATATATGTTATATGATGTCCATATACAATGAGTGAGTTTCTTGTATGATATATGACATATGATGTCCATATACAATGAGTTTCTTTTAACTATCTTTACCAGGTG |
| **ASYMMETRIC LEAVES ENHANCER 3 (AE3)**:  TCCCAGACTATGCTAAATTGAAAAAAGGACCTAGAGACCAGGTAGAGAAACAAAAATATGGTGCTCGTCACTATAATTGGCATCATTTTTTGAATAAAATCTTCAAGGGCTTCAAGCAAAAGGAGCCAAGTATTACAATCCATAGCCAACCTGTTCCATACCTCCGATACACCTTGCTTGGATGTTAATGCAACTTCAATGGTAGACTTGGCCTAACATACTTTTTCTAGTCCTCTTGAAATATCTTCATCTACACCATAAGTATAGCTTTGCACCATTGTATTGAGACGAATAAAGACTACCTAGCACATAAACCCAAAAATTTGCTTGCTGCACTTTTCAAACCCTTCCCCATCAAATTACATCTTTAGACATGCAGGAGAAGCTTCGCAGAGAAGCTTCGCAGAGTTGTGATACAGGCATGCACAAGAGCAATCACGTTTCTTTTCAAATTAAGGCATTCATATAGAGTATCTAGTCTTGTTGTGAACAACACTCATCCTATTTTCATATCAACATTATTCATCGCAAAGTTTCCAGTGCAGGGTTAAACACTGCAATCTGCACCTAGAAAAAAAAACCTCAACCGCTGCCAGCATGCACTGGACAAGTGTTCATTGCATTCACTATCAAGATGAATAGACTACATTCTCAACTCATAGGTGACAACAGATCTGTTGTGAAAACAAAGGTTAAATTCATCTATACCAGCCAAACACAGATGATGCATGTGTAAAGAAGCATGCAATCTGGAAAATGGCTTACAAAAAAGGTAATCTGTGGTTTTAGTGTGGCTTTGCTACCCAGCAGCTGAAATGGCGGACCCTGAAGATCCATCTGCAAGCTTCTCATGCTCCTTGTTCAACACCTTGTTGTTGATGAGATTGTGCAACGCGATGACGCTTCGAATAAGTGAAGCCAGATAAATGACCAGCATCATGTCATTTGTTTTCACTGCGAAGGACTTAACAAGCTCATTGACATTCAAGTTTGGCAGTAGATTGAACACATCCTGTAAATGGTAAAGAATTTCATGATTCAGAGGCAACTTTCCATCTATAACGTAGTCCAAGTACGAATGAATCTCCTTCAAACGTGACTCAAGACCCTTCAAAGCAGTCAATTTTCCACTAACCTCTGTTGCAAGCGTGCTTATAGTTGTGTCCTTCACATCTCTCAAAAGATGTTCAACACCAATTTCTTCTGCCTCATATGCACCAATCTCAGAAGCTACATGCACAAAAACTTTTTGGCTTTTCTGAGTGGAATCCTCCTTAACTTCTTCAACTGCATAGTAAGCCTTAGTTGGAATTCCGAGCTCTTTAGGCTGAACATCAATGATTACGAGCACTGGATTGGGGACATAGTCTCTAAAAAGCTCGTGTACATTTAAATCGTTCTCGCGCAACTTAGGCCCGGTACTATACCAGCCTACAACGTGTTCTTTGGCATTGATTCTTTTGAACATGTCAAACATAGCCTCATGGTAATTGTGGTCCAGGAACCAAATGCTGGAATCCTTATCATCCTCCTCAAAAGGAACTGCATAGCTGTTGGTAACATCGACACGGCCACGAAAGACAGCTCCAAGAAGAACGCCAACAACGCGCTTGCGAGTCTCCTTGGCCACACGATTGTAGTTATCAACAATGCTGAGCAGAACGAGAGGGTGAACGACGACCTTCTCGATGGTTCTCTCCCCTATGTGGCTCGATGTAACCACGTCCATCTCCACCTGCTCCTTCTTCTTCTCTTCTGCGCTTCTCTTTCTTCGTCGTCTCCTCGCGCTCTGTGTGCGTGCGTTCGTTTAGCTCCCCCCAAAAGCACGCAACAAAGAAATGTGGAGTTGTTGAAGCAACACGCCTTCTCTGTACAGACCTTACTTCACTTCCCAATGTTGCCCTTTATTTGCTCACCCGGACAACCTTCGTCTTCAAAAGCTAGATTCCTA |
| **NATB CATALYTIC SUBUNIT (NAA20)**:  TTTTGAGTTACGCATCAGTATGCTCCTCCGCAAAAACGGCCAAATCCCACATTGCTTACTCCCGTAAAGAAAGAAAGAATGACGACCATCCGGCGTTTCTGCTGCGAGGACCTCCTTCGTTTCAGCTCCGTTAATCTCGATCACCTCACAGAGACTTTCAACATGTCATTCTACCTCACATACTTAGCCAGATGGCCAGACTTTTTTCATGTGGCAGAAGGGCCAGGCAATCACATCATGGGCTATATTATGGGAAAAGTAGAGGGACAAGGAGAATCTTGGCATGGTCATGTTACTGCGGTAACTGTAGCACCGGAGTATAGGAGGCAACAACTTGCAAAGAAGCTAATGAATCTTCTGGAAAACATCAGTGAGAAGACGTACAATGCATTTTTTGTGGATTTGTTTGTCAGAGCCTCTAATGCACCGGCTATAAAGATGTATGAGAAGCTTGGATATGTCATATATAGGCGCGTGCTAAAATATTATTCCGGTGAAGAAGACGGCTTAGATATGAGGAAAGCTTTACCTAGAGATGTCGACAAAAAGTCGATTATACCATTAAAAAAGCCAGTCACTCCTGAAGAGCTGGAGTATGACTAGACACTATGTTGGCTAAATATATAGAGACTGCTGGTCATAATACTCTGGCAGTATGGTTCTTTTCTACGAGCTTATGGCATTAAGTTTTATGACCTTGTCATAAAAAACATTTGCTTAGAAACCTGTGTGTATACTTGCAGCTGCTCTATAGTTTTGTGAGTGTGAGTATTCTCTCTTAGGCTACATATACTTTGCTCTGTAATACAAGCAGCCTACCACCATTCATTGATTTCACCTTGCCATCTTTACTCTTCGCAACTGCTTCCGATATATACGAGCTTTCTGGTTCTCAACTCCACAAATAGTTAATGATATGCATCATGATGGCAGGGAGATGAGTTTTTATAAGTTGTTCGTTTTCAACAAGGACAATTAGAGCTTTAACTTCTTTCATGCAAAAAAA |
| **MITOGEN-ACTIVATED PROTEIN KINASE KINASE KINASE 1 (ARAKIN)**:  TCTCTCTCTCTCTCTGTGTCTCTCCTGTGTGCGCGTCTTCTCTCTCTACCACGAACCCAGTCCTTGCTCCTGAAGGCGCAACAGCTTCGACCATCGGGATTCATGGTCGCCTGCACAGAATTCCCTCTCCTTTTGAAGCTTGCTAGCCATGGCTTCCTTATCCAAGCAATCCTCCGCAGGTAAACCCAAGCTTGAAAGACGCAATGCAAGGAAAATCTCTGATTATGAGCCCTCAGATTCTCCACGTACAGCAGCTGTTCCCTCTCCCTTCAGAGCTCTTGACAAGGGCTCTTCTAAAAGCTTCAGGGTCTTAGGGATTGACAGTCAAGGGGAGATCGACAAGATATGTGAAGAGTTGGGCATTGACGGTGGCGCTGATGCATTCAGCATAACGCCAGACGCTTGGGAAGCAGGAAGGGCAAAATCAGGCTCGCTCGATCGCTTCATCCTAGAGCACAAAACTCGTTCGAGGTCCTTTGATGAGCCGCCGGGCAGCTTCTTAGGTCACCGTGCCACAGGAGCTGGGGATGGTGAGCTTGCCAGCTCCGTCCTGGCAAGCATGCGCAGCCTTAGCCCCAGACGGACCAGCCCATTTTACAACTCAATGTCTTCTTCATCTGGGGACTCGTTCGCTTCCGACAGCAGCCTTGTCACAGGGGAAAAGGGTTTTTTTGGATCTCTCGATACGCCAAGAGAATTGGTGCCAGTTATGGTTGTTAGTGAGACTCGGCATCATAATGATCGCCAGCAGCCTGGCAATGTGATTCAACGCATGCACAACCATGGCATACATGAGACACAACATCTCGATGATTGCAAGCAGACTGGCAATGTTGCCCGTGACACCATTCATGAGACACGGCCTCAAGATAATCGTCAGACTCGCACACACCTTGGGAGTGGCCATGACGCGCATGAGGCACAGCATTTAGTTGATCGCAAGCGGACTGACAATATTGCTCACGACCTCTCCATTAATGAGACACGGCGTTGCGACAATAGTCAGACTGGCAATGAAATGGAAAGGGTTTCAAGAGTGTTAGAGCAAGCGGCTCGCTTAACGATTGAGACTAATCGACAAACGTTACTACCTCCACCTGGATTTCGGGTAAAGTCGTACCTTCCTTCTCTCTCAACTCAGGAGCTGATTGCGAGCTTCGGGCCAGATGAAAGTGATAACAATGACCGAGCAAGCGATCATGATGACGCATCCCATAGTGATCCTGAAGACTATGAAGCTGATGTAATAGAAGACAAAGCAAGAGAAGAAGTTGACTTTGTGTCAGAAGTAGTGCAACAGCACGGGGTTTTGGCCAAAGAGCAGATCCTTGTGGAAGACACAGTGGCTACGGTTCCCTCCACACCGGAACCTGCCAATATGATAAGCATTCAGTCTTGGAGAAAGCTTGACTTGCTGGGCAGTGGCTCATTTGGAACGGTATATGAGGGGATGTCTGAGGACGGAGTATATTTTGCAGTGAAAGAAGTGTCTTTGTCCGAACATGATAGCAAAGCGCAGCAATGTGTTTTACAGCTTGAGCAGGAAATCGAGTTTTTGAGCAAATTTCAACATGAGAACATTGTACGATATATGGGTACTCAGAAGGAATCTGATAAGCTGTACATTTTCCTCGAACTTGTCACCAAAGGCTCACTTTCTTCACTTTATCAAAAATATACTTTATTCGAGTCACAAATACGATCCTATACACGGCAAATTTTGAATGGTTTGAAGTATCTGCATGATCGGAAAGTTATGCATAGAGATATTAAATGTGCCAATATATTGGTGGATGTCACCGGAAAGATCAAGGTTGCAGATTTTGGATTAGCAAAGCAGATATCTCAACTAGACGAACTTAAGTCCTGCAAGGGAAGTGCCTACTGGATGGCGCCAGAGGTCATTGACCCAAAGAAGACGTACAGTTTTCCAGCAGACATATGGAGTCTGGGATGCACAGTACTCGAAATGGAGACAAGGCGTCCTCCTTTTGGTGACATGGAATGGCATCGTGCATTATGGAAGGTTGGGCATGGGGAAGCACCTCCAATACCTGCGACTCTTTCTGAAGATTCTAAGGATTTCATCAGAAGGTGCCTAGAAGTTAATCCTGCCAGACGGCCCACAGCCAGGCAGCTTTTGGATCATCCTTTTGTGCAGTATGTAGGTGGAACAGGCCTTACACCTAGAAATTCCTTCACTCAGGACACTCCGGAGCTTCCAATCATTGCAGAAGACAAGACTTTTGATGGTTGACCATGAGTCCTGAATGTGCCAAGTTATGGCCTACAGGTTTTTTTTTTCCAGAGGTGATTGAGATGTGTGAAGTGCTGTGGTTAATGTGTTCGATCATGCTTTGGAGACGAGCTCTGCAAAAGTACAAGTGCACAGGCCGTAGTCGCAATGCCGAAGTCTGCATTGGATAGGAGGAAGATGCATGAGCTAAAGGAGCAGCAGCATCTCTTCACAGAGACCATTTGTACAAAAGCTTGCAGGCCTGTTCTGCAAGAGATGAAACTGTGGAAACAGCATGACTTTGTACTTAAGCCTGGTCATTTATCCAAGCCCAATTCATGGTAATTTCGGACTTATAGCTGATGCTCTGATTGCTTTTATGGAGGTCTTGTTTACCAAATAAGATGACCGTACATCTTTCTAGATTCTTTAAGGAACTATCGAGCCATAATACTTGGTCATATATGTATTCAGAAGGATTTGAGATGCGACTTTTGTACGAGTGTTGTTAGGGAATGAGAGCATTTCTCTTTGGCAAACCTGTGCCTTGTATAGAATTGATTGAGCAGTAAATGGCTCCGCCTGGAAAATCCATCAACTGGGCAGAAGTGAGGCAGTACGGATGTCTTGTTTGCACATTCTGTATATCTGGTTTTCTGTGACAAAGCTGCACGATTTCTCTTGTAATATTTTTGATTGGCCAAGAGCACTCCAAGCAGTTTATGGTAGTAACGGTGTGAAGAAGAAGTTGGAGATTAATACGGCCAAGTCACGCTGTGGAAAGCGGTTATCAGTCATTAAGCTTAACAGCCGGTAGTTCCTAGTTCAGGAAACTTGCAATAATGAGAACTGTTCATAACAGCATGCAGACATTTTTTAGAGACATGGCAATGTAATTTTGGTATTCTTTCTTTAAATCTCTACTTCATAACGCTGCTGCGAAGGTCATGTGCATAGCAGTTCCAAAGATGCATGGTATGAAGGCAAGAGAGACTCGACATTCAATCTGTATGAAAAGAGTGTATCTATTTCTAGCACCTTTTATTGTATTCTATTGTATATACCAGCTCTTGCAATAGTTGGCTACTACTTACTAGCAGCAATACAATCAGCAATGTCTTTCTTTGGAAAAAATAAATGTGTATCTTTGGAGTTGACATGCATCTTTAGAGTTTACAGGTTTACAGATGAAAGACTCCTTCAGAGACCCCCTCTACTTCAGCTCATCCACCTTCTTCTAGCTTGGAGCCGGATCAATAGCAAATTAGCACAAGTGCAAATGGAGATAGTTCCTCATATGAGAAACTATTTCTTACTTTATTAGAAGCCTATAGTGTGCCTCCTGTTAAGGAGTTGAGAAGCTCTGCCAAGAATAAATGTAAAATATAGTTCTGTATTTAGGCAATCCCTTAAGAGCTTCGAGCCCGGGATTGCCTTTTTTTCTTTTGTTGGTGATACCTCTTGGTTACTTTCCTCTACATTGTAACCCCTTTTGTGTATTTTACCTTGGGTCTTGCCATCGAGGTAAAATAGAATGATTTATTCTCTTGGGAAAAAAAAATTACATTGATATAACGTATCCAATACCCTACTGTTCAGAGTCAAATTACCTACGAACCAAGTGCAAGACAAAATAGGTCAAGGGTGATGAAGAACCTTTCACAAGCCCCAAGTGTGATACATTTTAGCAATAATTAGACCAAGACAATCAAGTTCAGGAATTTGGAAAACATTCAAGTAACATAATAAGGCTAAAAGACACAACTGCTTGTCACACCCGTAATTTCCTTAGCTAAATCCATAAAAAATAACAAACCTGGAAGTATTTAAAAACATCTCAGATCTGTGACCTACATCAGCTTCTTACAACACTCAGCATGCAACTATCAACAGAATCTCAGAGTCATCAGCTGTGGTTAACACCGTCTAGAAATAAAGGTACTCCAATGACACTTATAGATCATATAGTAAAACTTTTCGTATTTGAGATTTGCTATTAAAGTAACCCGATCTAAACAGAAAGGGAGATTTACAGACTGCTTGCCACACCCATATAGGGCTAACTTCAGCCATAAACGGCAAAATTACAAGCATACATGGCATAGCAGTGTATGTTCGCACACAAAATGCAGATATGATAGCCTTCTATGCCAAAATCTTACATCAAAGCATGCCAATGCTCTGAAAAGAAAGTTTTGGTCTATCAACCACGACTCTTATGTGCACAGCAAAAAAATAAATCATAAATAAAGTATATCCAGGCGTAAGTACTTATACCGACCTTATTTAAGAGCCTTCCAATCGAGCCTTAAGCCGGACATGAAACAGAAAAAAAAAGATCCCGATGCCCTTCTTACCTGAAGATAATATCCCATAGCGGCATGCTATATTTAATCAAAGTGTTCTTGCCTTGCTTCAGACATATCAGTATCCCCATCTTCATCTGGCCTGGAACCCGTAAGAACTTGCCCGCTAGCCTCATTAGCCAACCCACCAGGACCACTAGAAACTGTTTCCGCACTATTGGATTGGCTAGTATTCCCAGCTTGTGCATTGGCAGGCGACATGAAGGTGGTCGTAATCCCTCTAAACCATGGAAACGTGATTGAGAACCGTCTTCCCGTTCCTTGCACCCCCGCTTCCCTGCCCCTGGTGTTACTATCTTGTGAGACAAGGGTCTGTTGTTCCTGCTGCTGCGAGGCAGCATTGGTGTCTGTAGGAAACCTCCCCACAAGGAACTGCCTTGGAATACCTTGGATCGAAAAACCACCAGGCCCTCTTTCACCCCCTCCCTGCACACCTCTAGCCATTGCAACATCAGAAGTGGAGCCTGTTCTTTGTCCGCGGGTACACCCTTGCTCGTAGTCAGGATCATCTGTGGGCAATTCAAATCGACACACAGGACAAGAATTGTGCTGTGCCAACCATGGCAAAATACAATCTTGGTGATATAAATGCTTACATGGCATCTGCTTTGCTTTGGAATGCAGTTCAAACTCATCCTTGCACACTGCACATTGGGCAGCATCCGTTCCTAGGTGTTCTTCAGATATAGCAATAGTAGGCAAGGCTTCAACAGCTGATTTTGAAGCCGGGGGAGCTCCATATCTGTTTGGGTCATTTTCAGCAAGCTGTTGGATGAGCTGTTCAAAACCTGGTCCAATGAAATAATCACCAATGCTACCAGGCAAGCGGTGAGGTGTGCCACCTGCAACATTGTCAAGCAGAAATTCACCATTGCGCATGTTGAGGAGGTTTTGTATTCGACCTCGTAGGAGAAGTATGGGATTGATGTTTCCAGGTTCAGTGCCGAGGCTTATATGAGCCCCTGAGCCTCCACCTTCTGCTGCCTGAACCATGTGCATGTGGGTGAGGAAAGATGACATGTCTTCGAGCAGCTGGCCAAAGCCGGGAGCCATGTAGTCCCATGCATTCAAATCAATGCCGGGGGCATTGGTGGCCAAAGGAGGCGCATCGGCTGCAGGGCCGGACCATTCCTCAAGGAAATCACCATTACAAGTTGGGCAGATCAACTCCCCGGGATTCGTGGGTCGTACAGCCTGGGAGCACTGATGGCAATAGTAAAGCTGCCCAATATCAGATGCCATAGAGAAGCGGCGGAGTTGGTCGCCGGTTGCAAGCTACTGAATCGATCTGTACATAGAGATGTGGCAGTTTACTACCCTAACCCTAGGAAAGACCGTCGTGTGCAAGTGATCCTGAAAAATGTGAGAGAGACACTTGCCTTATCGATCCTTAGGAGTAGTGGGAAGGGTTATTCTGTGCAGAAACGAGAGTTTTGGCGATGGCGGGTGTAGAAAGCAGCGATCCAAGGCCCCGCGTGAGGGGCTAGGAGGCACCCATTTCGTGAAACGACATATGCTCGCCATGGCTCATTATAATCCAGTACAGCTTTATGGGCGCGTGCACGTGTGATACGTTGGCCACGCCTTTGGCCGCCCACGCCTCTGCTCTCGATTTGATTTTATCTGATTTCCTCCTAGGCTAGCCTCTTT |
| **PBS1-LIKE 39 (PBL39)**:  AATTGATCCAACATATTTCTGCCATGCTATGATGTGTACTTGGTGAAATCTCCAATCTAGAAAAATATATTTCCCTCTTAAAATACCTCATTCAAATGGTTCCACGTAGTGGCCCCGGTAGAAATCACAGCAGAGGTTATTGTTTTGCATCTAAAGTGAAGGCACTTATACCTCTATGACAGCTATCGACATAACCTTTACATTGAATTATAGACATTGTTTGTGATCTCCATAGAGTCTATGCCTCACTGTAAGAATAACATATGGGTGTAATAATCTGGGATTCTAGTTTGTTCACACACACATCAAAATTATCTATGCTTATGAGTCATAACTGGTTCATAAACATCTCACATCAGCTCTTTGACAGGGCCATTCAAGCAGGAATAGGTTCTGAAGCCCACTCTCTTTTTCTGACATCTTCACCAAAAAACCCCCTTTTCTTTGAAGGCTTCTTGTGCTTGGATTTCGAACCACTCTTTGCCTCAACACTCAGGTGTGCATCACTGGCATGGCTCTCGCCTCCCTCGAGTATATGTTTCAAACTCCCCACCACAACACTCATTGATGGGCGTGCTTTTGGAGCTCTATGAGAACAATGGAGAGCTAAATCCACTATGTGTTGTGCTTGAATCAAAGGGTAATCTCCTTCAAGTCTGGGATCCATGATAGCGTACACTTTCTTCTTACCATGCAGGTAAGGTCTGACCCACTCAAGCAGATGTTGCTCGCTTTTTGGACGATTTCGATCCACAGACCTCCGTCCTGTAAGAACTTCAAATAGCACCACCCCAAAGCTCCAAACATCACTTTTCAATGTAAGACGGCCTGTCTGTACGTATTCTGGAGCAGCATAGCCTATTGTCCCAACCACCGAAGTTGAAACATGGCTTGCCCCTATCTCTGGACCCTGTCTGGCTAGCCCAAAATCCGACAATTTTGGAGTCCAGTCGTCGGCTAGCAAGACATTCGACGTTTTAAAATCACGAAATATGACCTGAATACCTTCTATCTCTTCATGCAAGTAAGCCAAACCGTGGGCAGCACCAAGCATGATGTGAAGCCGCTGTTCCCACGTGAGAACAGGATATTCTGTGCGAAAAAGATAATCCTCGAGGCTTCCCCTTACCATATACTCATACACAAGCAGGCGCTGTATTCCCCTCTCATCATCTTCTGCACAATATCCCACCAGCTTCACCAAGTTGGGATGCTCTACCAGCCCAAGAAAGCGAACTTCTGCCAGCCACTCCTTGTGCCCCTGTTGGCCATTTCTATTCAAAAGCTTCACAGCCACTTCCTTTGAAGATTGTGGGTCGTTTGGATTGCTGCCCTTGAGAGTGCCTTTGTAGACACACCCGAACCCACCCTCGCCCAGTAGATTGGAACGCGCGAAGTTGCCAGCAACCGCCCGTAGCTCCGCATACGTGAACACCTGAAGCTCCAATGCCGTCCCCGACTTGCTCTGCTCCAAAGACGAAGTCTCTTCGCCTTGGCGCATTTGCTTTAATTGAGACGATGCTTGTTGCTTTGCATGTGATGATGAAGAAGGCGATTGTTTCACTGCATTGGCTTGTAACGAGGAAGAAGGAGGGGCTGATTTTGATTTTGAGGATCTCTTGCCCTCTGAAGATGAGCCATTGCTGAAGAAGCCCCAGGAAAATCTGTGCTTTGAATCAGGCCCGCATGATTTAGAAGAGAAAGGAAAACACCTCATGGCACGAGCCAAGAGAGAGAGAGAGAGAGAGA |
| **TRANSCRIPTION FACTOR TGA2 (TGA2):**  TTTTTTTTTAGGAGAAGCAAGCTTAGCATTAGGAGAAAAACAAAGAGCTACATGTAGAGAGCAAGGAGCTACTAATTTGATGACAAATTCTCCTACAAATGGCATGGTGAAGCCTTTTCAAGAGCAAAGATTTTTGTGCTAGTATGCCCTTGCAAAGACTCTTAATCATAAGCATAGAGAGAGAAGAAATAGACATGGTGAGAGCTTAGCATTTAGATGAGATATATGCATAGGAATTTTGGGGGGGGAGGGGCAAAGAGAGTGATGATGGTGTCTAATTCAAGATCTAAATGAGTGCTAAATTACTCTAAGGTGAAGAGAAAGGAAGCTTTACTAGAAGAGAGTGGGAGAATAGTGAGAGTTAAGCATGGAGAGCTTCATGGCAAGAGAGGGAGGAGAGTGGCACTTCTTCTTCATAGTGGGCAACATGAGAGGCTCAAGAGGGAGAAGGGAGAGGGCAAGAAAAGAGGGTAAGAAGAAGGCCCCAAACTCGTGGAAGTGGGGGGTATTTATACAAAAAGATGGAGGGGTGAGGTGTGAGTGAGTGTGTGTAGTGAGGATTAAATTGAGCACATGGTGTGGGTGGATTGCAAGGGTAGGGTGAGGTGGAAGGACTAATGTGATGTGATTAGGGTGAGGTGGAGGGACTAGCCATGTCATGGCTAGAGAGTGAAAATAATTACAACATTGGCTATGCAAAGCCATGCATGGGCATTCCATCTACAAGATGTGATGATGTGATAATTACAAGGGGTGATTTTTGTTGTCTTCACTCACTGCTGGCGTCAATACTTTGCTCCCGCTGCTGCCACTAAGGGTGGATGCACACGCTTTATGTACAACTACTCATGCCACGAAGCTTTATAACATTTCTCATCATATTGAAGATGTATGCATATGGTGTGAGAATGTGAGTGCCCAAGTATGCTTGCAAGAGTGCACATAAGTGTATGTGCCCGTGTGTGCATGAACTTGCAAGTGCCAAGTGTATTCATGTTTCAAATAAAAATTATTATGGGTGCATGGTGGCATGCAATAGTATGCATGTAAACATGTCTATGGGTGTGCATGCTTAAAACACAAAGAAATGTGTGGTCGACCTTGCTGGGATGTCGTTCCAAAAGATCAAAGAGGGGTTAGTGGAAATGGGTGTGTGTACATGTGTATGCTTGGCATGTGTGTGATTAAAGGAAGAGAATATGTGTGCCGTGTGTACACATATTCATGTATGGTTGCGTGTATGTTCATATTCATGCGGGGGTGTGTGTGCATATAAGTATGTGCATGTACTTGTGCACATGCGTGTGTGTTTGTAGACGAGCAACTAGTGTGTGTGTGTGTTTGTGTGTGTAGACCCATTCCATGTCACTTTGGGCTTTCTGCCTCTGCGCGTGATAGGGTGTTTGCGGTGTGGATCAAGTTGCGGGCGCTACAGCTGGTGATTCAAGCTGCCATTGATCTTCTTTTCATGTTTTTGCTTGTATAGCACTCTCAGGACTGAGGTGAAGCAGTCCAATGGCTGACAGCAGGCACAATCCCGGGCTTCCGAGTGTCCTTGGTCACGGCATGCAGAGCTTTCTCCAACCATCCGTAGAATTCAGAGACACCAAGGGTTCAGATATAGTTAGCCTTGCAAAGATCAATCAGCCTGTGAATGCAGGCTTGAATGAAGGAGTAAGCTTTTTTGACAAAGGTTTCTTTCCAACACCTTATGTGGGCAATTCTAACGCACTGCCTGCCATTCCTCTTCAGTACAACTGTCGGCAAGTGGACAAACAGCAAGCCTCTCACTCGAGCTCCTTATCGGAAGCCAGCTCAGAGTCAGAATCTGCACAGAACCTGAACAGACATATGGGCTTTGATCCACCACCAGGTCGGCCCTTCCAAAACTGGGCTGATCGTAGTCCTAGAGGAGAGACTTCCACGAGTATGGAAGGAGATGCCAAAGAAAATGACAAAATGGAGAATAGGGTAGTGGCAGCTTCTGGTTCTTCTGACCATGATCGTGGGAAGATTACAGATTCTAAGGTTCTGCGTCGCTTGGCACAAAATCGTGAAGCAGCTCGTAAAAGCCGCTTGAGGAAGAAGGCTTATGTTCAACAGCTGGAGTCGAGCCGTGTGAAGCTCAATCAAATGGAGCAAGAGCTTGATCGAGTGAGGCAACAAGGAGTGTTCATGGGAGGTTCCTCTGGAGATCACAGCCATCCAGGTGTTTTTGCCTTTGATATGGACCATGGACGGTGGGTCGAGGAGCAAAATCGGCAAATATCTGAGCTACGGTCTGCTTTAGCTGCACATGTGACTGATAATGATTTACGGGTGCTTGTGGACAATGGTGTTACACATTACGATGAGCTTTTTCGACTGAAAGGAGTGGCTGTGAAAGCAGATGTGTTTCATATCATGTCTGGCATGTGGAAGACGCCAGCTGAGCGTTGCTTCATGTGGATGGGTGGTTTTCGCCCTTCCGAACTTTTGAAGATCTTAAGTCCGCAGCTGGAGCCACTTACGGAGCAGCAGCTTATAGCAGTGTGCAATCTGCAGCAATCCTCACAACAGGCGGAGGATGCTCTATCTCAGGGTATGGAAGCTCTACAGCAAAATCTGGCTGACACGTTGGCTGGTGGGTCACTTGGAAATTCGAATGTGGCAAATTATATGGGACAGATGGCCATGGCTATGGGCAAACTCGGCACGCTGGAGAATTTTGTGCGCCAGGCTGATCACCTTCGGCAGCAGACTCTTCAGCAAATGAACCGGATTCTTACTACACGCCAGGCTGCAAGGGGTCTTCTTGCCATGGGGGACTATTTCTCACGCCTTCGGGCTTTAAGCTCTTTGTGGGTAGCCAGGCCACGAGAATGAGAAACTTACAGGTCTGTGGTGAAGTTTAAGAGGCTAGTGGGTTTCTGGTTTCTGAAATGTTGGGAAGGAAGTCATGGGTCACAAGATCAAGGGTTGTCTATAGATGTAGAATGGGGTTCATGTAGACTACAGGGGGGATATTATGCTGGTTGGTCATGTTCATAATATTGGATATATGTTACATGGGGCTGTAAATGAACTGAAGTTACTGCAAATCCATGAAGGGCAAAATTTGTATCCAAGAAACTGCATTATTGTAGTGTAGTACTTGCCCATCCCTGTTGGTTGTCTCAGTGTAACCCTGAGCACTTGTACTACAATGTGCTTCAGTAAACATGCTAGGAGACTATAAGACTTCATCTAACATAAAGAGGTGCCCAGGTTTAGACGAAACAGACATGCTGTCTGTTTCCTCGATTGCATGATTCTTATGACTTCTATATTGAGCATTTGTTGTACCTTTATCGGAGAGTTTTCGGACTCTTTGGTGGTAACAGGCCTTGTACTTACTAGTTTCATGGGTGCCAGTCTAAAAGGTCAGCTACCATTACATTCATGGATGATTTGCCCAATGAATTTCGCCTCCATCATGGTCACTTGTCTTGCAGATCCTTGGTTGCATGATTCTTATTTCTACTGGAGAGTTTTTTTTGACTCTTTTGAGCAAAAAAACCTTGTTTTTGTGGGTGCCAGTCTAAAAGGTCAGCTACCATTACATTCATGGATGATTTGCCCAATGAATTTCGCCTCCATCATGGTCACTTGTCTTGCAGATCCTTGGTTGCATGATTCTTATTTCTACTGGAGAGTTTTTTTTGACTCTTTTGAGCAAAAAAACCTTGTTTTTG |
| **FLAVIN-DEPENDENT MONOOXYGENASE 1 (FMO1):**  GTGGCTAAGGATAAGAAAAGAAAGTGAAGAGAAGGGTTAGCAAAAGTTAAGGAGAGAATTGAGTGCTAATCCTTTTCATCTTTTTCCTTGTCAATTTTTCCCATCTTAAGTCATTCATTTACATAGGCTACAAAAGCTACATGTTTCAAGTTGGTAGCATGTCCATTTAAGAAAAAAGCTATAAATTTGAGACCTCTGAGAACAACATAATTAGGCATTGCACTGTCATGTGAACACCATTACAGTCTTGCTTGTGTGAATGATTTCTTCATCAGCACAAACTTGTTTTATGACTAACTCGCTATTGCCGAACTTGATGAAGATACATCTCAGAAGCGTAATGTACATCGGATGGGTTATAGAGCTGCAACAAGCAAAGAATGTCTGCATACTCATAGATGGCCAAAATACATCGATAAACGGGTAATATATACCAGATAGGTTACAAAACTGCAATGCACTCATTTAGCAAAGGATGAGGGCATATTGATAGTGAATATGCACAATTACATAGAATGTGTAGACACCACTTGTAAGCTGTTTTAGTGAGCCTCATCTTTGTAATCCATATTACTATATGGAGCAAGAAACTCCTGAAGGAAATTGTTTTTCCTTTTCGGATTCCATCCGAGGTCCTGGCACACTTGATCTGAATGCCATATGCTAACTGCACCTATACAGGATTTGTGATAAAAGGGGGTTGAATTCTTCATGTAGTCTATCCACTTCTGTGTGATTTTTTCCATTTTGTCAATGCTTGGAAGAGTGATTTTTTGAGAAAGCAAGTGAGCCAGCCATCGTGCGCCCATTTCAGACGAATGAAGGTTCGAAAGGTTCTCATGAAACCCCATGATTGCCAAGTCGGGAATCCGAGGATGGATCACACCTCTGTAAAGAGGTAAAACATTTCCCAGACCTTGCAGTTCCCCGCATTCTCGCTGTAATAGTGATCTGAGCTTTTTTTCCCCATCGTATCCTGTGCCTAGAATTATAACATCAGCTTCTATGTTAGTTCCATCTGCCAGTACCACTCCAGTTTTTGAAAAGCTCCAATTTGCTGCCTTGTGCAAATTGATGTGGCCAGTTTTCACTCGTTTGAAAAACGCTTTGGGCAATAGAGGAACCTGGCAAGAAGCAAACTGCTCAAAAAAGGTCTGGTTTGGTATAAGGCCAAGCTCTCTGAGAGGGAGGTTAAAGAGAAGGTAAAGCTCGACAAACTTAGAGATCGCCCATCGCGCTGGTGTCAAGAGAGTTGAAATGACACTGAGCAGAAACCCCTGATCAGGCTTTGGAATCATCAATTCAGAAAGCCTCGTTGCATAAAGGTATGACAAAGGCAAGCCGAAAGGTTTGTGATGAGGGAGCATCCAATGAGCACTTCTGAATATTACGGTGCACGGGTGACCATGGACACCTTGGTTTGCATTTGAAGCCTCCATGGCAACGTCGAGTGCTGATTTCATCATTCCAACAACCACAACACGCTTGTCTTTGAGCAATTCTCTAGCTGCCCAATCATCCAGCATAGCGTACTCCATGGAATGCAACACTTTGCCTTCGAAAATTTCAGGCCCTTTGCTTGGTGGGAAAATTGGCAGCTTGGGAATGTCTCCATATCGACCAATGCATAATATAAGAAAGTCAAAGTAAAGCCACTGCAAGCACCAAGGATATCAATCTGGTAATCCTTTTCTGAAGCTTCCTGTTTAAAGTGAAATAATACATGCATCACACCCGCTCGTGCACAAGACCCAACAACTGAAAGGGAGCAATGCCCTTCCAATATTGGCCTTTCCTACAAAGGAAAATGTAAAATTATTTGATTTGTGCTCAATAAACTAGAAGTTCAGTAAATATAATTCACATCTCAGAAAATGCATATGTTGCACAAAAATGGAGGGCAATCAGAGCTGCAAAATCCATTAAAAAAAATCTATTTTTCCCTCTTTCACAATTTCAAGACTTCCAATTGCTGAATAATGAAAGAAAAAGTTAACATTCCAGCGAAATCTCTTCTCCATAGAGTTTCGACAAGACTCAAGCAAAGAAGATCCGAAGAAAGGATCCTTCAAGAAGACTGTCACCAGATGGAATAGAAAAAAAACCTTTCCATTGAATAACTAATCTTTCCTTACTAAAAGACATTGGCAGACAAGCAGAAACAGGGTGACAATTGAGTTGCCCTAGAATTGATACGTGATGTTCTCCTGGCGGTTGTGACCGTGAAGAGTGTGTATGCACGGCCATTTAGAGCATTTCCAAAGCTTCAATGTCCTTGCAAATTCCACTACTTGTGCTTCGTAGCGCATTCTGTCCGCTAAAACTCTCTACTTCGAAAACTCTACACATATTTGAAAGTTGGAAACTCCATTCCGCGGCATACTTACAAGTTACATACCACCCTGCCATCATGTAAAGAAGAAAACAAAGCTTCCCTGCATCCTTTGGTTTCCAAATATTCAGGCAAGGTCCCTCGAAATGTAACTAATGTGATGAAGCATCAATTCAATCTAGCCAAATGGCATGGTATCGTCATGTCGAATTTAAACCTGCCCATTGTCTATATAGAAAAAATATGATAGGTTGCAAAGTCTAAAGAAGAGAAGGCCAATCAATGATTGGTGGTCAAGAAAACTACCTCTGTATCATCATCGTGGTTAACATGCGGGGGCCTCTTGTCAAGGGAACCCTTTCGAATGCGTACAGACCAACGAGAACCTTTGCTGATTTGTTCACCATCATAATCAGCATCATCACTTTGATTATCATAATGGTCATGCTGTCGTCGAATGTCGATCACTTTGCAGTTGAATCTGATGCGATCCATGACATGATATTTGCATGCATAGCTATGGAGGTACTCCATCACATCTGTGTGGGAGGGATAATCAGGGGTTCCCGGGGGCCACGAGTAATCCGAGAATTGGTAGGCGTCCCGGGGGGTCTGCAGCTTGGTGGTTGCAAAGGTGTGCCTCCAGACACCGCCGACTCCCGGTTGCGCTTCAAGGACAACTGGCTGGAAGCCATGCTGCAGAAGGTACTTGCATGCACAAATGCCGGTCATGCCGGCGCCTACAACGCAAATGCGAGGGCTCTTTGTGTCATGACAGGAAGGGGGAGAACCCAATTCGGAGATGGGAGGTGGGCTGTGTGTGTATATGTCCATGCTTGAAGTTTAGCGAGGTTTGTCTGTGCTTTTCTGCGTGGGTGAATCCATAGCAGAGACAATGTTGAATGGAGCCTTTGACAAAGGAGGATTTTAGAGGATTTTAAATTCAAATATCCTTTTGTTCACTTTTGTTTGATATTTG |
| **SUPPRESSOR OF FATTY ACID DESATURASE DEFICIENCY 1 (SFD1):**  GCTGCTTCTTTGGATAGAGTAAAGACCACCTTGCTTCAAACTGTTTAAAGGGGAGCGATGGCTGCATGTCCTCCTCCCCTCTTCCCTCGCCTTCAGCTGCGGGCCATCTACTGTGCTACTTCACGCAGCTTGCCTCGCCCCTTCACTCCCTGCGACCACATTCAACTCCTCTGTCAAACTTCCTCCTCAAGATCCTTCGTTCCTGCCTCCTCAAGCTCCAACGTTTGCATGCACGAGGGCTCTCCTGTTGAAATTAGGGTTTCCGAGCTCTCCTCGAGGGTCATTGAACCGTCCATTTCTTCAGATTTCATAGCACGGGAAGCTTCCTCTGCAGAATGTAGGCTTGATTGCTCAGCTGGATATGAGAGCCAGCGGACTTCTGCAGAATCTAGGGTTGAAGATGTTGCAGATAGAAAGGTCAGCGACACTTTTCTTTCTGATGAGGCATCCACAACCTGCTCCATAACGGACACACATGCTTTATCTTTGGCTGGAGCCAGGTTGCTAGGGGAAGCTTCTCCTTCCAATGAGATATACAGAACAAGCTACTCTATGCCCCAAGAAAAGGCGTCATCATTGCGGGCTTCCTCGGATGCTGTAGAGAGCTCACAGAGTTTGTCATCTGCATTGGCTGCATCTACACAGACTCGAGATCGGAGTAAAGTTGTAAGAACTGCATGGAAGGCCCTTGTGCGATGGTCCAGGTCATGGCAGCTCCTGAATGCGCGCAAGGCCACCAACGTGCTGCAGAAAACAAGAAAGGTTGTCGTGATTGGTGGAGGCTCTTTTGGAACAGCCATGGCTGTATTATTAGCAAGGAATAAAGCTGAGATGCAGGTCAGCTTACTTCTTAGGGATTCCTCTTTATGTGAATCAATAAACAATGATCATATTAACAGGAAATATTTTCCGAAGCACATTTTACCACACAATATTGTTGCAACTATCTATCCACAAGAGGCGTTCAAAGATGCTGAGTATTGCATTCATGCTGTTCCAGTCCAGTACAGTGCAGAATTCTTGAAAAGCATATCAGAACATGTTCCTCCCAGTCTTCCATTCTTTTCAGTCAGCAAAGGTTTGGAGTTATCCTCTTTGGAAATGATGTCACAGGTCATCCCGCGAGCGCTTGGCAATCAGCGGCAGCCTGTAGCAGTAATTTCTGGGCCTTCCTTCTCAATTGAACTTATGGATGAGCTTCCTACTGCAATGGTTGCTGCTTCAAAAGACAAGGAACTTGCAGAAGCTGCACAGCAACTTCTGGCATCTCGATATTTAAGAATTAACACTTCCAGTGATGTTGTTGGTGTGGAAATTGCTGGAGCACTGAAAAATGTGCTTGCAATTGCTGCTGGTATTGTGGAGGGTATGAATCTTGGAAATAATTGCATGGCTGCTCTTGTTGCCCAAGGTTGCTCTGAAATCCGATGGTTGGCTGAAAAGATGGGTGCAAAATCAACAACTCTTGCAGGGTTGTCCGGTACAGGGGATATAATGCTTACATGTTTTGTGAACCTATCAAGAAACCGGAGTGTAGGAGTAAGGCTTGGTTCTGGAGAATCACTAAGTCATATCCTTTCCTCAATGAATCAGGTCGCTGAGGGTGTGGCAACTGCAGGAGCAGTGATTGCCCTTGCTCGTAAGTATCGTGTTCAAATGCCTGTTCTGACGGCAGTGGCACGTATACTTGACAATGAGCTAACACCAAAAAAGGCTGTTCTTGAGCTGATGAGTCTTCCGCAGGTGGAGGAAGTATAGCCAGCTGGTTTGAAAAGAAATGAGTGCTATATGGAAGGGTTGGGTTCTGAAAGTCCTCTGGGTCAAAAGAGACCTGTTGTGCAAGGGGCTGCATCTGTTGTATGAGCTGACCTATGGCTCACTTCTGCGTCACAACATCATTTTGGCAGAAAATCCTGAGAGGAAGATAGGGGACTGTGAGTTACTGACTGACCATACACTCATTTCCAATATAAACCGTTCCACATCAACATCCCTTCAATCAAAACAATCACCGAGGTACTTCAACTGCTGTATCTCCTTGGAGAGGTCTAACACATTTTCTGGTGGATTTTGGTACCACTAGTATCAAGCTTTACAGAAATTTCGCAACTCAGTCTAAGAACCCCTCGTTCTGGAGGTCCAAAATAACTTGTAACTATCAGTGTAACCAAGTTGTGAAAATTTTCTATGTGAGGCTCTGTTGTAACTTGTAAGTGTGCCTTAAAGCATCATCCACTTCTCACCAGTGTAACCAAGATTGGGATGTGAGAGAGCACCAAGATTGGGATGTGAGGCTCTCTGCTCTTCCTTCGACGCGTTATTTATTTCTGTGATGTCATCTTTGCACACGGTTGCAAACATCATAAGCATTTGTCTCCGAAATTGAAAAGAGTATTTACCAAATTGCCATCATTTTTCTTGTACAAAAAGGA |
[truncated: 164,305 more chars]
